# Supplementary material
Source: PubMed Central journal article supplement (PMC3322228)
Supplement: mmc1.pdf [file mmc1.pdf]

## Supplemental Data

### Identification of *IRF8*, *TMEM39A*, and *IKZF3-ZPBP2* as Susceptibility Loci for Systemic Lupus Erythematosus in a Large-Scale Multiracial Replication Study

Christopher J. Lessard, Indra Adrianto, John A. Ice, Graham B. Wiley, Jennifer A. Kelly, Stuart B. Glenn, Adam J. Adler, He Li, Astrid Rasmussen, Adrienne H. Williams, Julie Ziegler, Mary E. Comeau, Miranda Marion, Benjamin E. Wakeland, Chaoying Liang, Paula S. Ramos, Kiely M. Grundahl, Caroline J. Gallant, Marta E. Alarcón-Riquelme for the BIOLUPUS, and GENLES Networks, Graciela S. Alarcón, Juan-Manuel Anaya, Sang-Cheol Bae, Susan A. Boackle, Elizabeth E. Brown, Deh-Ming Chang Soo-Kyung Cho, Lindsey A. Criswell, Jeffrey C. Edberg, Barry I. Freedman, Gary S. Gilkeson, Chaim O. Jacob, Judith A. James, Diane L. Kamen, Robert P. Kimberly, Jae-Hoon Kim, Javier Martin, Joan T. Merrill, Timothy B. Niewold, So-Yeon Park, Michelle A. Petri, Bernardo A. Pons-Estel, Rosalind Ramsey-Goldman, John D. Reville, R. Hal Scofield, Yeong Wook Song, Anne M. Stevens, Betty P. Tsao, Luis M. Vila, Timothy J. Vyse, Chack-Yung Yu, Joel M. Guthridge, Kenneth M. Kaufman, John B. Harley, Edward K. Wakeland, Carl D. Langefeld, Patrick M. Gaffney, Courtney G. Montgomery, and Kathy L. Moser

## Supplemental Acknowledgments

Support for this work was obtained from the US National Institutes of Health grants: R01 AI063274 (P.M.G.), R01 AI070983 (S.A.B.), N01 AR62277 (K.L.M and J.B.H.), R3724717 (J.B.H.), AR042460 (J.B.H.), R01 AR043274 (K.L.M.), P01 AR49084 (R.P.K. and E.E.B), P01 AI083194 (J.B.H.), R01 AR33062 (R.P.K.), P30 AR055385 (E.E.B), LRP AI071651 (T.B.N.), R01 CA141700 (M.E.A.R.), RC1 AR058621 (M.E.A.R.), P20 RR020143 (J.B.H.), R01 AR051545-01A2 (A.M.S.), UL1 RR024999 (T.B.N.), K24 AR002138 (R.R.G.), P60 2 AR30692 (R.R.G.), P01 AR49084 (R.R.G.), UL1 RR025741 (R.R.G.), P30 RR031152 (J.A.J. and J.M.G.), P30 AR053483 (J.A.J and J.M.G), N01 AI50026 (J.A.J and J.M.G), K08 AI083790 (T.B.N.), R21 AI070304 (S.A.B.), 1U54 RR23417-01 (J.D.R.), R01 AR43814 (B.P.T.), P20 RR015577 (J.A.J), P60 AR053308 (L.A.C.), M01 RR-00079 (L.A.C.), R01 AR054459 (C.Y.Y), P60 AR049459 (G.S.G. and D.L.K.), and UL1 RR029882 (G.S.G. and D.L.K.). This study was also supported by grants from Lupus Research Institute (T.B.N.), The Alliance for Lupus Research (K.L.M., T.B.N., L.A.C., M.E.A.R., and C.O.J.), the Korea Healthcare Technology R&D Project, Ministry for Health and Welfare, Republic of Korea (A080588; S.C.B.), the Arthritis National Research Foundation Eng Tan Scholar Award (T.B.N.), the Merit Award from the US Department of Veterans Affairs (J.B.H. and G.S.G.), and the Arthritis Foundation (A.M.S and P.M.G.). Additional funding was awarded from the Swedish Research Council, Swedish Association Against Rheumatism, the King Gustaf Vth 80<sup>th</sup> Jubilee Foundation, the Fundación Instituto de Salud Carlos III PS0900129 PS0900129 co-financed by FEDER funds of the European Union, the Consejería de Salud de Andalucía PI-0012, the Wenner Gren Foundation for support (C.G.), Arthritis Research UK (T.J.V.), the Wellcome Trust (T.J.V.), CTSA Grant Number I ULI RR025014-02 (A.M.S.) from the National Center for Research Resources (NCRR), Kirkland Scholar Award (L.A.C. and

J.A.J.), and Wake Forest University Health Sciences Center for Public Health Genomics (C.D.L., M.C.C., M.C.M, and P.S.R). The work reported on in this publication has been in part financially supported by the ESF, in the framework of the Research Networking Programme European Science Foundation - The Identification of Novel Genes and Biomarkers for Systemic Lupus Erythematosus (BIOLUPUS)" 07-RNP-083. Work was supported by the Federico Wilhelm Agricola Foundation Research grant (B.P.E.). Support was also obtained by a grant from Korean R&D program of MKE/KEIT (10035615; Y.W.S.) and the Oklahoma Medical Research Foundation Barrett Award Predoctoral Scholarship Fund award (C.J.L.).

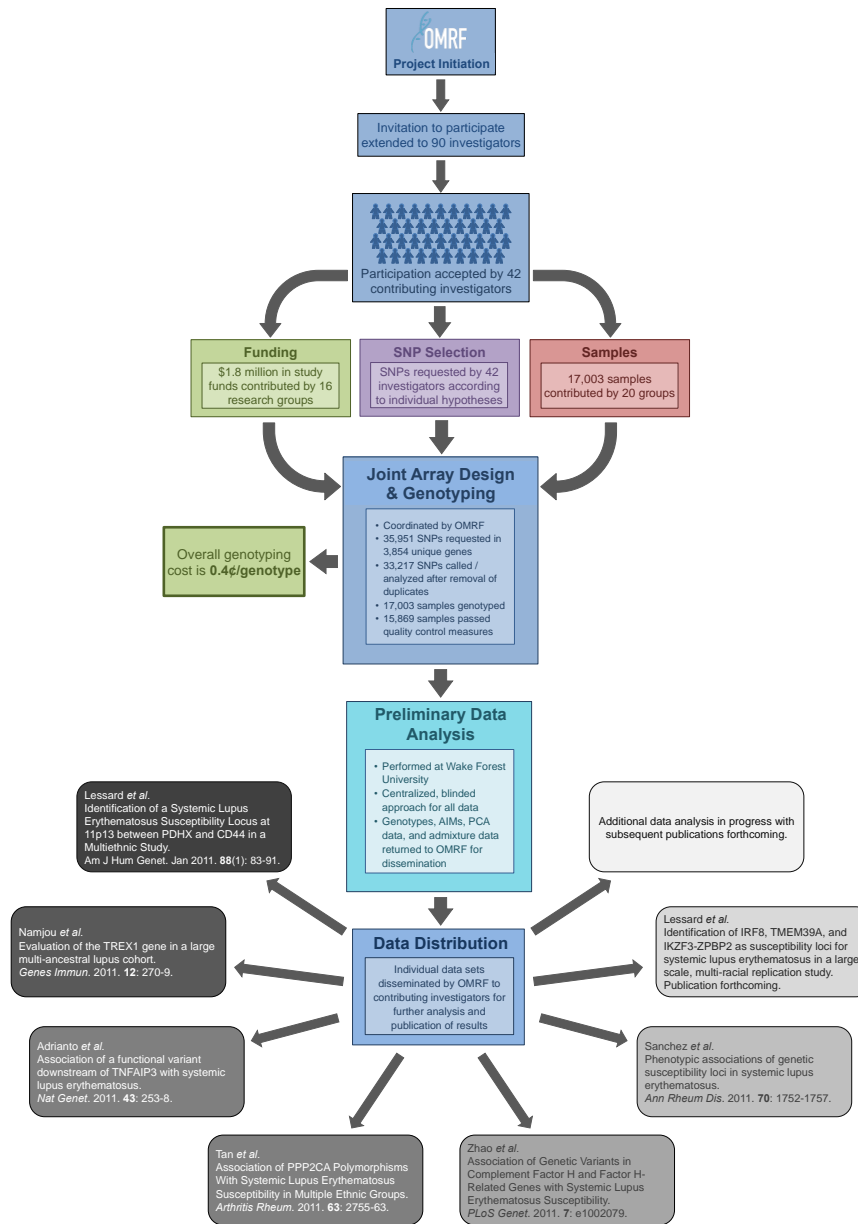

**Figure S1. Study Design for the Large Lupus Association Study 2 (LLAS2)**

This flow-chart diagrams the study design for LLAS2, a consortium in which resources, samples, and funds were pooled to create a custom genotyping array that allowed 42 independent investigators to test individual scientific hypotheses in a large cohort of shared SLE patients. As a result, this collaborative effort resulted in significant reductions in the cost per genotype while preserving the autonomy of the investigators.

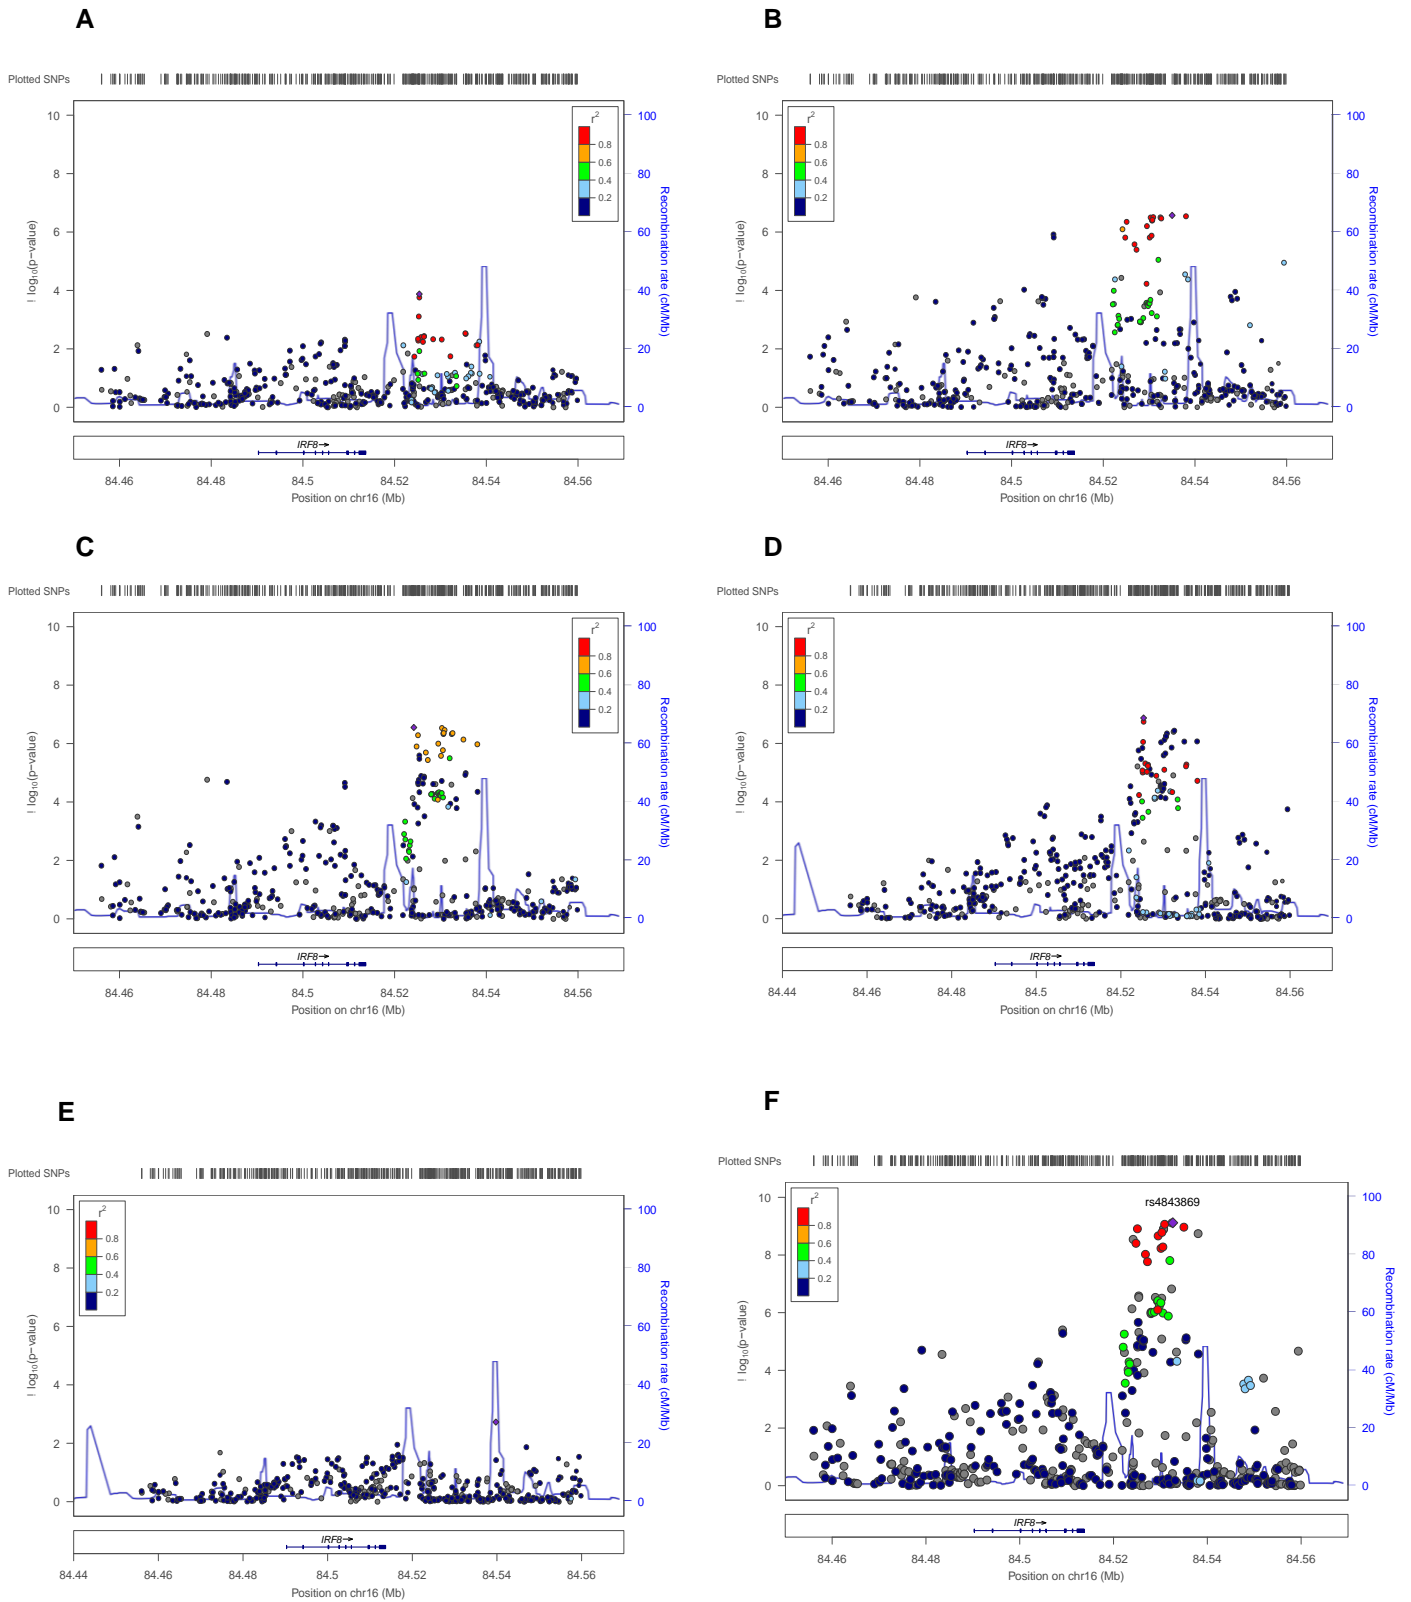

**Figure S2. Summary of Results after Conditional Analyses**

European associations with *IRF8* and SLE after adjusting for rs4843869 (A); rs450443 (B); rs11117427 (C); rs8046526 (D); rs4843869, rs450443, and rs8046526 (E); and unadjusted (F).

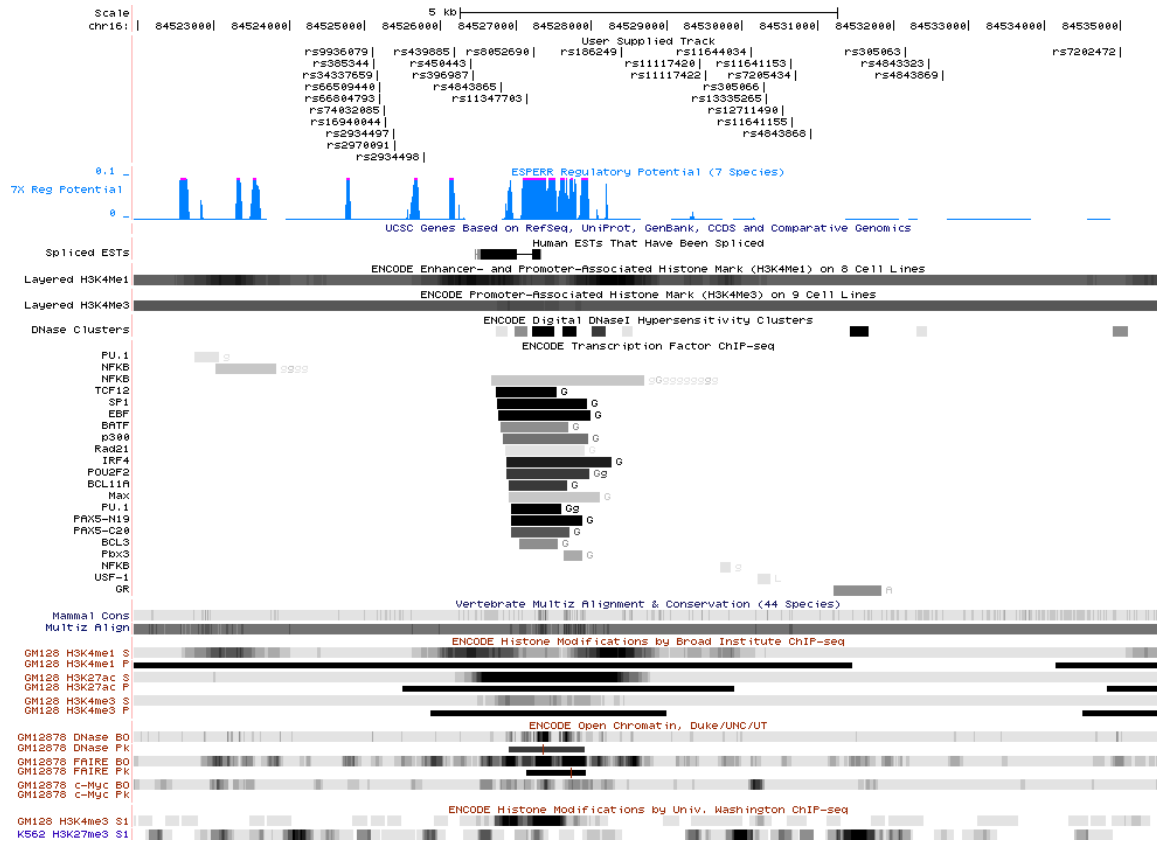

**Figure S3. Genomic Features in the *IRF8* Region of Association Bound by rs9936079 and rs7202472 Demonstrating Association with SLE**

Note that EST stands for expressed sequence tag. For the ENCODE Histone Modification by Broad Institute ChIP-seq and Univ. Washington ChIP-seq, the first abbreviation stands for the cell line (e.g. GM128=GM12878 cell line), the second abbreviation stands for the antibody used (e.g. H3K4me1=histone H3, monomethyl K4), and the third abbreviations stands for signal (S or S1) or peak (P). For the ENCODE Open Chromatin, Duke/UNC/UT, the first abbreviation stands for the cell line (GM12878=GM12878 *Tier 1* cell line), the second abbreviation stands for the experimant (e.g. DNase=DNase-seq), and the third abbreviation stands for signal (BO=base overlap) or peak (Pk).

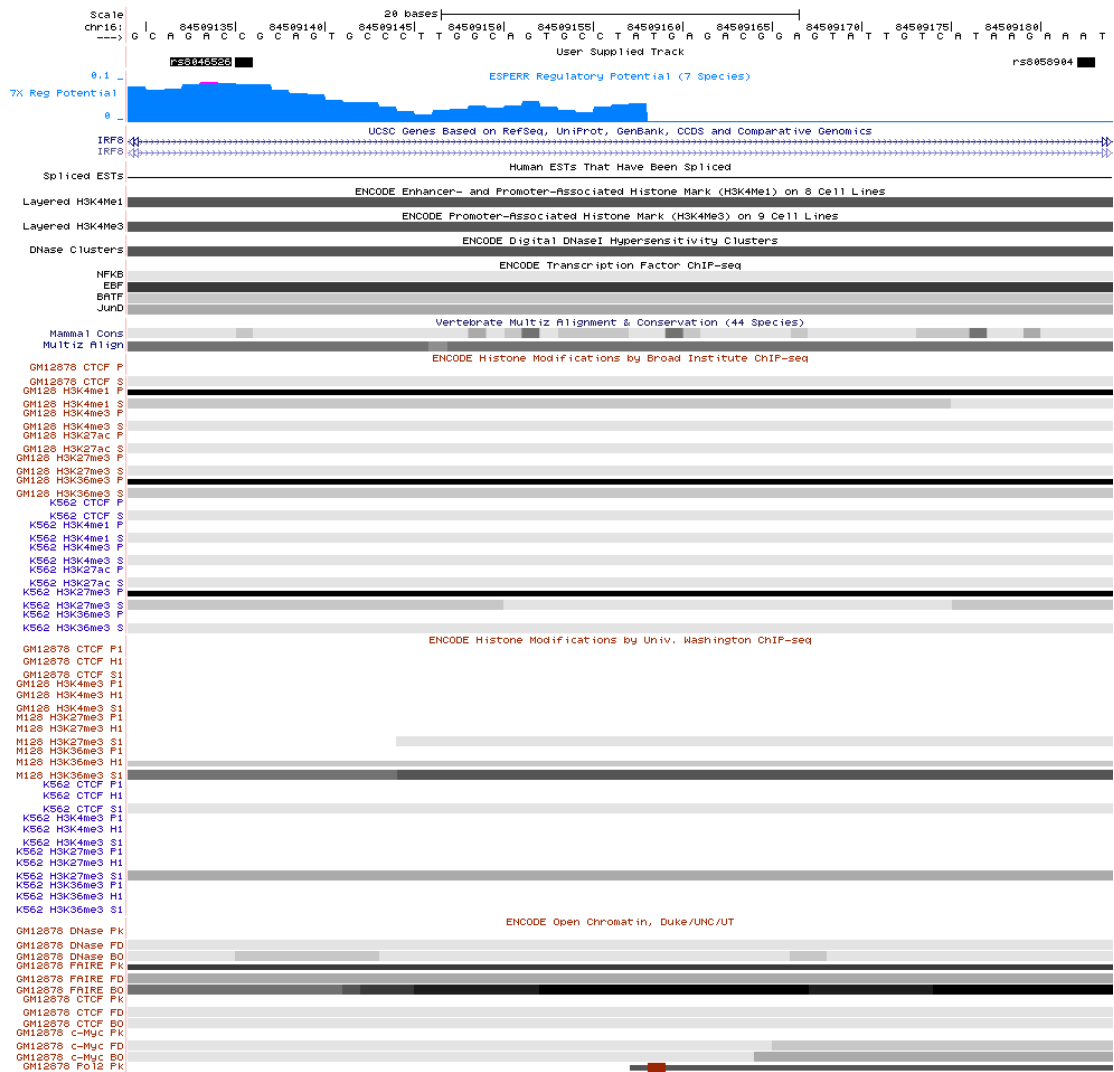

**Figure S4. Genomic Features in the *IRF8* Region Bound by rs8046526 and rs8058904**

Note that EST stands for expressed sequence tag. For the ENCODE Histone Modification by Broad Institute ChIP-seq and Univ. Washington ChIP-seq, the first abbreviation stands for the cell line (e.g. GM128=GM12878 cell line), the second abbreviation stands for the antibody used (e.g. H3K4me1=histone H3, monomethyl K4), and the third abbreviations stands for signal (S or S), peak (P), or hotspot (H). The number following S, P, or H refers to the rank (1<sup>st</sup> or 2<sup>nd</sup>). For the ENCODE Open Chromatin, Duke/UNC/UT, the first abbreviation stands for the cell line (GM12878=GM12878 *Tier 1* cell line), the second abbreviation stands for the experiment (e.g. DNase=DNase-seq), and the third abbreviation stands for signal (BO=base overlap) or peak (Pk).



A

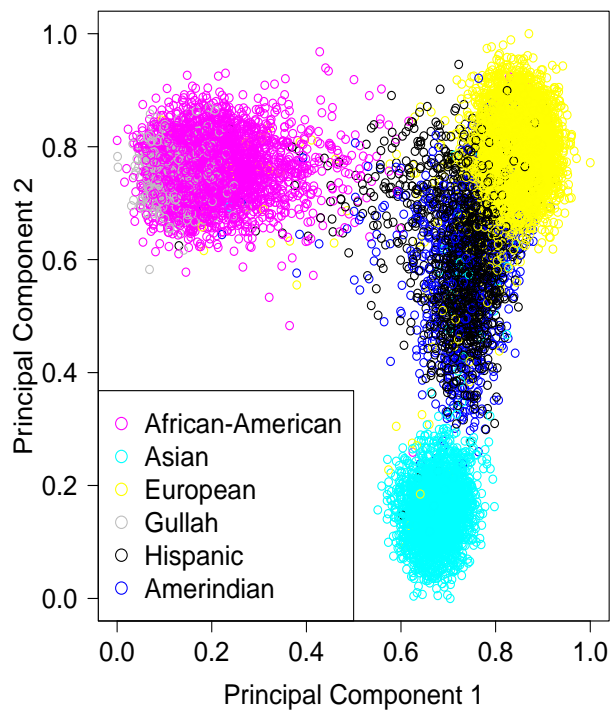

B

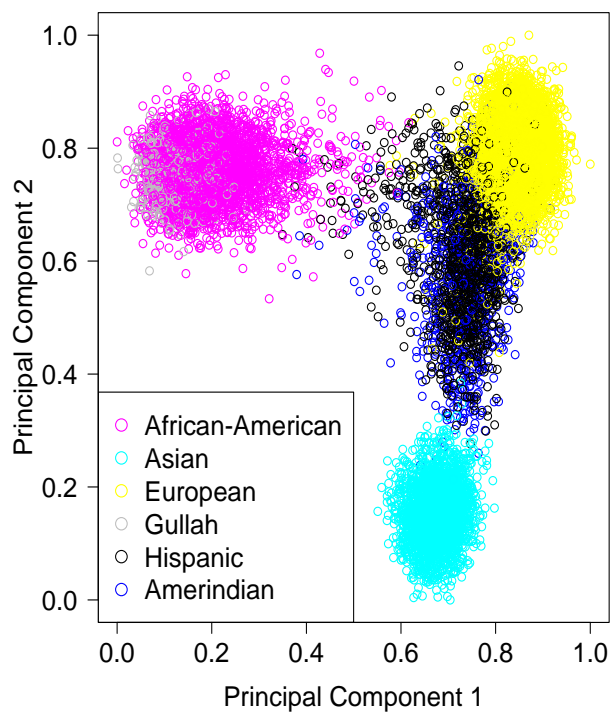

**Figure S6. Plots of the First Two Principal Components before (A) and after (B) Quality Control**



**Table S1. Summary of Samples Genotyped**

| Populations       | Number of Samples | Case  | Control | Unknown Disease Status | Male  | Female | Unknown Gender |
|-------------------|-------------------|-------|---------|------------------------|-------|--------|----------------|
| African-Americans | 3,462             | 1,569 | 1,893   | 0                      | 723   | 2,733  | 6              |
| Asians            | 2,676             | 1,328 | 1,348   | 0                      | 296   | 2,380  | 0              |
| Europeans         | 8,066             | 4,248 | 3,818   | 0                      | 1,642 | 6,403  | 21             |
| Gullah            | 286               | 155   | 131     | 0                      | 34    | 252    | 0              |
| Hispanics         | 1,383             | 1,033 | 350     | 0                      | 160   | 1,222  | 1              |
| Amerindians       | 1,126             | 589   | 537     | 0                      | 67    | 1,057  | 2              |
| Unknown           | 4                 | 0     | 0       | 4                      | 0     | 4      | 0              |
| Total             | 17,003            | 8,922 | 8,077   | 4                      | 2,922 | 14,051 | 30             |

**Table S2. Summary of Dropped Samples after Quality Control**

| Population        | PC or ADMIXMAP Outlier | Relative or Duplicate | Heterozygosity Outlier | Unknown Disease Status | Low Call Rate | Gender Discrepancy | Total |
|-------------------|------------------------|-----------------------|------------------------|------------------------|---------------|--------------------|-------|
| European-ancestry | 51                     | 138                   | 4                      | 0                      | 335           | 111                | 639   |
| Asian             | 39                     | 50                    | 2                      | 0                      | 43            | 17                 | 151   |
| African-American  | 30                     | 57                    | 4                      | 0                      | 17            | 16                 | 124   |
| Gullah            | 1                      | 8                     | 1                      | 0                      | 1             | 0                  | 11    |
| Hispanic          | 9                      | 21                    | 0                      | 0                      | 45            | 11                 | 86    |
| Amerindian        | 8                      | 65                    | 1                      | 0                      | 40            | 10                 | 124   |
| Unknown           | 0                      | 0                     | 0                      | 4                      | 0             | 0                  | 4     |
| Total             | 138                    | 339                   | 12                     | 4                      | 481           | 165                | 1139  |

**Table S3. Summary of Samples Remaining after Quality Control for Analysis**

| Populations       | Number of Samples               | Case                          | Control | Unknown Disease Status | Male  | Female | Unknown Gender |
|-------------------|---------------------------------|-------------------------------|---------|------------------------|-------|--------|----------------|
| African-Americans | 3,338                           | 1,527                         | 1,811   | 0                      | 695   | 2643   | 0              |
| Asians            | 2,525                           | 1,265                         | 1,260   | 0                      | 253   | 2,272  | 0              |
| Europeans         | 7,053<br>(7,427) <sup>a</sup>   | 3,562<br>(3,936) <sup>a</sup> | 3,491   | 0                      | 1,495 | 5,932  | 0              |
| Gullah            | 275                             | 152                           | 123     | 0                      | 33    | 242    | 0              |
| Hispanics         | 1,297                           | 961                           | 336     | 0                      | 149   | 1,148  | 0              |
| Amerindians       | 1,002                           | 531                           | 471     | 0                      | 58    | 944    | 0              |
| Unknown           | 0                               | 0                             | 0       | 0                      | 0     | 0      | 0              |
| Total             | 15,490<br>(15,864) <sup>a</sup> | 7,998<br>(8,372) <sup>a</sup> | 7,492   | 0                      | 2,683 | 13,181 | 0              |

<sup>a</sup>Number of European cases before removing 374 samples to render replication independent from GWAS

Table S4. IRF8—Observed Data for All Races

| SNP        | Position (bp) | European          |                  |          |                         | African-American  |                  |          |                         | Asian             |                  |          |                         | Gullah            |                  |          |                         | Hispanic          |                  |          |                         | Amerindian        |                  |          |                         |
|------------|---------------|-------------------|------------------|----------|-------------------------|-------------------|------------------|----------|-------------------------|-------------------|------------------|----------|-------------------------|-------------------|------------------|----------|-------------------------|-------------------|------------------|----------|-------------------------|-------------------|------------------|----------|-------------------------|
|            |               | alleles (maj/min) | MAF case/control | P        | OR (95%CI) <sup>b</sup> | alleles (maj/min) | MAF case/control | P        | OR (95%CI) <sup>b</sup> | alleles (maj/min) | MAF case/control | P        | OR (95%CI) <sup>b</sup> | alleles (maj/min) | MAF case/control | P        | OR (95%CI) <sup>b</sup> | alleles (maj/min) | MAF case/control | P        | OR (95%CI) <sup>b</sup> | alleles (maj/min) | MAF case/control | P        | OR (95%CI) <sup>b</sup> |
| rs305082   | 84494479      | A/G               | 0.170/1.27       | 2.37E-01 | 0.95 (0.86-1.04)        | G/A               | 0.470/0.48       | 3.77E-01 | 0.96 (0.86-1.06)        | A/G               | 0.110/1.20       | 2.84E-01 | 1.1 (0.92-1.32)         | G/A               | 0.440/0.47       | 4.01E-01 | 0.86 (0.6-1.23)         | A/G               | 0.190/1.19       | 9.11E-01 | 0.99 (0.83-1.18)        | A/G               | 0.170/1.14       | 5.40E-01 | 1.13 (0.77-1.64)        |
| rs11862450 | 84494534      | -                 | -                | -        | -                       | G/C               | 0.030/0.02       | 1.71E-01 | 1.25 (0.91-1.72)        | -                 | -                | -        | -                       | G/C               | 0.030/0.04       | 3.55E-01 | 0.63 (0.24-1.67)        | -                 | -                | -        | -                       | -                 | -                | -        | -                       |
| rs13300375 | 84495083      | -                 | -                | -        | -                       | A/G               | 0.070/0.07       | 8.04E-01 | 0.97 (0.81-1.19)        | -                 | -                | -        | -                       | A/G               | 0.080/0.07       | 6.14E-01 | 1.18 (0.62-2.27)        | -                 | -                | -        | -                       | -                 | -                | -        | -                       |
| rs11865854 | 84495152      | -                 | -                | -        | -                       | G/A               | 0.090/0.09       | 7.52E-01 | 0.97 (0.81-1.16)        | -                 | -                | -        | -                       | G/A               | 0.100/0.10       | 9.61E-01 | 0.99 (0.56-1.75)        | -                 | -                | -        | -                       | -                 | -                | -        | -                       |
| rs1182511  | 84495157      | C/G               | 0.020/0.02       | 2.26E-01 | 1.17 (0.91-1.51)        | C/G               | 0.090/0.10       | 2.56E-01 | 0.9 (0.76-1.08)         | C/G               | 0.420/0.44       | 4.21E-01 | 0.95 (0.85-1.07)        | C/G               | 0.080/0.10       | 4.43E-01 | 0.79 (0.43-1.45)        | C/G               | 0.260/0.18       | 1.84E-02 | 1.25 (1.04-1.5)         | C/G               | 0.300/0.35       | 9.64E-01 | 0.99 (0.72-1.36)        |
| rs11642583 | 84496096      | A/G               | 0.120/0.14       | 9.94E-04 | 0.84 (0.76-0.93)        | A/C               | 0.220/0.22       | 8.21E-01 | 1.01 (0.9-1.14)         | -                 | -                | -        | -                       | A/C               | 0.250/0.21       | 1.20E-01 | 1.29 (0.87-1.93)        | A/C               | 0.120/0.12       | 3.89E-01 | 0.91 (0.73-1.13)        | A/C               | 0.100/0.11       | 4.62E-01 | 0.85 (0.55-1.31)        |
| rs9940980  | 84496182      | G/A               | 0.120/0.14       | 2.22E-03 | 0.85 (0.77-0.94)        | G/A               | 0.300/0.30       | 9.67E-01 | 1 (0.9-1.12)            | -                 | -                | -        | -                       | A/G               | 0.330/0.29       | 2.21E-01 | 1.26 (0.87-1.82)        | G/A               | 0.120/0.13       | 2.92E-01 | 0.89 (0.73-1.1)         | G/A               | 0.120/0.12       | 6.22E-01 | 0.9 (0.59-1.39)         |
| rs928664   | 84496256      | A/G               | 0.120/0.14       | 2.16E-03 | 0.85 (0.77-0.94)        | A/G               | 0.300/0.30       | 9.71E-01 | 1.01 (0.9-1.13)         | -                 | -                | -        | -                       | A/G               | 0.320/0.29       | 2.97E-01 | 1.22 (0.84-1.77)        | A/G               | 0.120/0.13       | 2.96E-01 | 0.89 (0.73-1.1)         | A/G               | 0.120/0.12       | 6.07E-01 | 0.89 (0.58-1.37)        |
| rs3794661  | 84497167      | G/A               | 0.040/0.03       | 3.07E-03 | 1.32 (1.11-1.59)        | G/A               | 0.020/0.02       | 1.47E-01 | 1.31 (0.91-1.9)         | G/A               | 0.100/0.10       | 6.28E-01 | 1.05 (0.87-1.26)        | G/A               | 0.020/0.02       | 4.81E-01 | 0.64 (0.19-2.2)         | G/A               | 0.050/0.04       | 3.50E-01 | 1.17 (0.84-1.62)        | G/A               | 0.030/0.01       | 8.16E-02 | 2.35 (0.9-6.16)         |
| rs9938084  | 84497454      | -                 | -                | -        | -                       | -                 | -                | -        | -                       | -                 | -                | -        | -                       | C/A               | 0.080/0.08       | 9.15E-01 | 0.97 (0.51-1.82)        | -                 | -                | -        | -                       | -                 | -                | -        | -                       |
| rs305081   | 84498831      | -                 | -                | -        | -                       | A/C               | 0.050/0.05       | 8.92E-01 | 1.02 (0.8-1.3)          | -                 | -                | -        | -                       | A/C               | 0.050/0.05       | 7.98E-01 | 0.9 (0.41-1.99)         | -                 | -                | -        | -                       | -                 | -                | -        | -                       |
| rs305080   | 84499275      | G/A               | 0.350/0.35       | 4.66E-01 | 1.03 (0.96-1.11)        | A/G               | 0.380/0.38       | 5.68E-01 | 0.97 (0.87-1.08)        | G/A               | 0.310/0.31       | 9.68E-01 | 1 (0.88-1.13)           | A/G               | 0.360/0.38       | 6.07E-01 | 0.91 (0.64-1.3)         | G/A               | 0.370/0.37       | 8.69E-01 | 1.01 (0.88-1.17)        | G/A               | 0.360/0.33       | 5.55E-01 | 1.09 (0.81-1.47)        |
| rs10514610 | 84499676      | G/C               | 0.050/0.04       | 1.97E-03 | 1.32 (1.11-1.57)        | G/C               | 0.310/0.30       | 3.54E-01 | 1.05 (0.94-1.18)        | G/C               | 0.090/0.09       | 4.98E-01 | 1.07 (0.88-1.3)         | G/C               | 0.360/0.34       | 4.96E-01 | 1.14 (0.79-1.64)        | G/C               | 0.080/0.07       | 3.82E-01 | 1.12 (0.87-1.46)        | G/C               | 0.080/0.04       | 3.86E-02 | 1.93 (1.04-3.61)        |
| rs11693917 | 84499921      | T/A               | 0.050/0.04       | 1.59E-03 | 1.33 (1.11-1.58)        | T/A               | 0.320/0.30       | 1.86E-01 | 1.08 (0.96-1.21)        | T/A               | 0.090/0.09       | 4.65E-01 | 1.07 (0.89-1.3)         | T/A               | 0.330/0.37       | 3.35E-01 | 0.84 (0.59-1.2)         | T/A               | 0.080/0.07       | 5.93E-01 | 1.07 (0.83-1.4)         | T/A               | 0.080/0.04       | 6.89E-02 | 1.79 (0.9-3.34)         |
| rs305079   | 84499997      | -                 | -                | -        | -                       | A/G               | 0.340/0.33       | 7.60E-01 | 1.02 (0.92-1.14)        | A/G               | 0.100/0.10       | 5.56E-01 | 1.06 (0.88-1.27)        | A/G               | 0.380/0.38       | 7.98E-01 | 1.05 (0.73-1.5)         | A/G               | 0.080/0.08       | 5.01E-01 | 1.09 (0.84-1.42)        | A/G               | 0.080/0.03       | 4.57E-03 | 2.7 (1.36-5.35)         |
| rs11545564 | 84500222      | -                 | -                | -        | -                       | A/G               | 0.200/0.20       | 6.83E-01 | 0.98 (0.87-1.12)        | A/G               | 0.010/0.01       | 2.34E-01 | 0.74 (0.45-1.21)        | A/G               | 0.220/0.22       | 8.09E-01 | 1.05 (0.7-1.59)         | A/G               | 0.110/0.08       | 5.00E-01 | 1.09 (0.85-1.4)         | A/G               | 0.100/0.13       | 3.85E-01 | 0.82 (0.54-1.25)        |
| rs305078   | 84500644      | -                 | -                | -        | -                       | A/G               | 0.060/0.07       | 1.42E-01 | 0.86 (0.7-1.05)         | -                 | -                | -        | -                       | A/G               | 0.060/0.09       | 2.05E-01 | 0.66 (0.34-1.26)        | -                 | -                | -        | -                       | -                 | -                | -        | -                       |
| rs172573   | 84500925      | -                 | -                | -        | -                       | A/G               | 0.040/0.04       | 6.90E-01 | 1.02 (0.92-1.13)        | A/G               | 0.290/0.28       | 3.67E-01 | 1.06 (0.94-1.2)         | A/G               | 0.340/0.37       | 3.99E-01 | 0.86 (0.59-1.23)        | A/G               | 0.320/0.31       | 4.29E-01 | 1.06 (0.92-1.23)        | A/G               | 0.280/0.24       | 3.26E-01 | 1.17 (0.85-1.61)        |
| rs305077   | 84500967      | A/G               | 0.360/0.34       | 2.06E-01 | 1.05 (0.97-1.13)        | G/A               | 0.400/0.40       | 1.40E-01 | 1.02 (0.92-1.13)        | A/G               | 0.290/0.28       | 3.67E-01 | 1.06 (0.94-1.2)         | A/G               | 0.340/0.37       | 3.99E-01 | 0.86 (0.59-1.23)        | A/G               | 0.320/0.31       | 4.29E-01 | 1.06 (0.92-1.23)        | A/G               | 0.280/0.24       | 3.26E-01 | 1.17 (0.85-1.61)        |
| rs11693930 | 84501600      | -                 | -                | -        | -                       | T/A               | 0.050/0.04       | 1.94E-02 | 1.33 (1.05-1.69)        | -                 | -                | -        | -                       | T/A               | 0.040/0.05       | 7.98E-01 | 0.9 (0.39-2.06)         | -                 | -                | -        | -                       | -                 | -                | -        | -                       |
| rs440222   | 84501917      | -                 | -                | -        | -                       | G/A               | 0.130/0.14       | 6.95E-01 | 0.97 (0.84-1.12)        | -                 | -                | -        | -                       | A/G               | 0.160/0.20       | 2.87E-01 | 0.78 (0.5-1.23)         | -                 | -                | -        | -                       | -                 | -                | -        | -                       |
| rs391525   | 84501940      | A/G               | 0.360/0.34       | 2.09E-01 | 1.05 (0.97-1.13)        | A/G               | 0.390/0.40       | 6.51E-01 | 0.98 (0.88-1.08)        | A/G               | 0.300/0.29       | 5.13E-01 | 1.04 (0.92-1.18)        | A/G               | 0.410/0.36       | 1.72E-01 | 1.29 (0.9-1.85)         | A/G               | 0.300/0.29       | 2.84E-01 | 1.09 (0.93-1.27)        | A/G               | 0.250/0.23       | 9.43E-01 | 1.01 (0.73-1.4)         |
| rs366304   | 84502301      | -                 | -                | -        | -                       | C/A               | 0.090/0.11       | 2.23E-01 | 0.9 (0.76-1.07)         | -                 | -                | -        | -                       | C/A               | 0.130/0.13       | 9.87E-01 | 1 (0.58-1.72)           | -                 | -                | -        | -                       | -                 | -                | -        | -                       |
| rs2292982  | 84502324      | A/C               | 0.360/0.34       | 1.59E-01 | 1.05 (0.98-1.13)        | C/A               | 0.410/0.41       | 8.16E-01 | 1.01 (0.91-1.12)        | A/C               | 0.340/0.33       | 9.36E-01 | 1 (0.88-1.12)           | C/A               | 0.370/0.38       | 6.45E-01 | 0.92 (0.64-1.32)        | A/C               | 0.370/0.36       | 5.28E-01 | 1.05 (0.91-1.21)        | A/C               | 0.340/0.31       | 3.60E-01 | 1.15 (0.85-1.55)        |
| rs2292980  | 84502377      | A/G               | 0.360/0.34       | 1.48E-01 | 1.05 (0.98-1.13)        | A/G               | 0.490/0.49       | 8.30E-01 | 0.99 (0.89-1.1)         | A/G               | 0.470/0.45       | 3.11E-01 | 1.06 (0.95-1.18)        | A/G               | 0.470/0.45       | 3.11E-01 | 1.06 (0.95-1.18)        | A/G               | 0.360/0.35       | 7.55E-01 | 1.02 (0.89-1.18)        | A/G               | 0.330/0.30       | 4.07E-01 | 1.13 (0.84-1.53)        |
| rs10939941 | 84502705      | -                 | -                | -        | -                       | G/A               | 0.050/0.04       | 2.33E-02 | 1.32 (1.04-1.68)        | -                 | -                | -        | -                       | G/A               | 0.040/0.04       | 8.61E-01 | 0.93 (0.39-2.19)        | -                 | -                | -        | -                       | -                 | -                | -        | -                       |
| rs8052064  | 84502732      | G/A               | 0.120/0.13       | 3.13E-04 | 0.83 (0.74-0.92)        | G/A               | 0.050/0.04       | 2.33E-02 | 1.32 (1.04-1.68)        | -                 | -                | -        | -                       | G/A               | 0.130/0.15       | 5.67E-01 | 0.86 (0.52-1.43)        | A/G               | 0.110/0.11       | 3.90E-01 | 0.91 (0.72-1.13)        | G/A               | 0.080/0.10       | 1.65E-01 | 0.72 (0.45-1.15)        |
| rs11693945 | 84502750      | G/A               | 0.020/0.03       | 1.70E-01 | 0.86 (0.7-1.07)         | G/A               | 0.030/0.03       | 7.63E-02 | 0.77 (0.57-1.03)        | -                 | -                | -        | -                       | G/A               | 0.030/0.03       | 7.10E-01 | 0.83 (0.32-2.19)        | -                 | -                | -        | -                       | -                 | -                | -        | -                       |
| rs147968   | 84503340      | A/G               | 0.450/0.44       | 3.25E-01 | 1.04 (0.97-1.11)        | G/A               | 0.330/0.32       | 3.84E-01 | 1.05 (0.94-1.17)        | G/A               | 0.450/0.47       | 2.65E-01 | 0.94 (0.84-1.05)        | G/A               | 0.300/0.26       | 4.52E-01 | 1.16 (0.79-1.69)        | A/G               | 0.450/0.44       | 4.13E-01 | 1.06 (0.92-1.22)        | A/G               | 0.430/0.38       | 2.91E-01 | 1.16 (0.88-1.54)        |
| rs4503518  | 84503518      | C/A               | 0.040/0.03       | 1.55E-03 | 1.34 (1.12-1.56)        | C/A               | 0.140/0.13       | 1.69E-01 | 1.11 (0.96-1.29)        | G/A               | 0.230/0.21       | 3.66E-02 | 1.16 (1.01-1.32)        | G/A               | 0.180/0.13       | 1.49E-01 | 1.44 (0.88-2.36)        | C/A               | 0.060/0.05       | 9.32E-02 | 1.32 (0.96-1.81)        | C/A               | 0.040/0.03       | 3.03E-01 | 1.49 (0.7-3.61)         |
| rs242971   | 84503951      | A/G               | 0.450/0.44       | 3.76E-01 | 1.03 (0.96-1.11)        | G/A               | 0.260/0.26       | 6.11E-01 | 0.99 (0.88-1.1)         | G/A               | 0.480/0.50       | 2.32E-01 | 0.93 (0.84-1.05)        | G/A               | 0.230/0.21       | 8.92E-01 | 1.03 (0.68-1.56)        | A/G               | 0.450/0.44       | 5.23E-01 | 1.05 (0.91-1.21)        | A/G               | 0.440/0.40       | 4.05E-01 | 1.13 (0.85-1.49)        |
| rs11649318 | 84503982      | C/G               | 0.400/0.39       | 3.77E-01 | 1.03 (0.96-1.11)        | G/C               | 0.460/0.46       | 9.04E-01 | 1.01 (0.91-1.12)        | C/G               | 0.450/0.43       | 1.75E-01 | 1.08 (0.97-1.21)        | G/C               | 0.440/0.44       | 7.93E-01 | 0.95 (0.66-1.36)        | C/G               | 0.340/0.34       | 9.94E-01 | 1 (0.86-1.16)           | C/G               | 0.290/0.26       | 4.65E-01 | 1.13 (0.82-1.54)        |
| rs8051462  | 84504828      | A/G               | 0.470/0.46       | 2.59E-01 | 1.04 (0.97-1.11)        | G/A               | 0.450/0.44       | 2.56E-01 | 1.06 (0.96-1.18)        | A/G               | 0.490/0.46       | 5.28E-02 | 1.12 (1.02-1.25)        | G/A               | 0.430/0.44       | 7.01E-01 | 0.93 (0.65-1.34)        | A/G               | 0.400/0.40       | 4.71E-01 | 1.05 (0.91-1.22)        | A/G               | 0.360/0.31       | 2.37E-01 | 1.2 (0.89-1.61)         |
| rs8450528  | 84505028      | C/G               | 0.470/0.46       | 3.16E-01 | 1.04 (0.97-1.11)        | C/G               | 0.480/0.50       | 2.28E-01 | 0.94 (0.85-1.04)        | C/G               | 0.480/0.46       | 6.94E-02 | 1.11 (0.99-1.24)        | -                 | -                | -        | -                       | -                 | -                | -        | -                       | -                 | -                | -        | -                       |
| rs1331970  | 84505479      | -                 | -                | -        | -                       | G/A               | 0.070/0.08       | 3.92E-02 | 0.81 (0.67-0.99)        | -                 | -                | -        | -                       | G/A               | 0.100/0.08       | 5.17E-01 | 1.21 (0.68-2.17)        | -                 | -                | -        | -                       | -                 | -                | -        | -                       |
| rs17444416 | 84505699      | G/A               | 0.060/0.08       | 9.79E-01 | 1 (0.87-1.16)           | G/A               | 0.060/0.07       | 7.51E-02 | 0.84 (0.69-1.02)        | G/A               | 0.050/0.05       | 8.70E-01 | 1.02 (0.79-1.32)        | G/A               | 0.100/0.08       | 5.17E-01 | 1.21 (0.68-2.17)        | G/A               | 0.060/0.06       | 6.04E-01 | 1.08 (0.8-1.46)         | G/A               | 0.070/0.05       | 4.25E-01 | 1.27 (0.71-2.28)        |
| rs400338   | 84506572      | G/A               | 0.120/0.14       | 6.08E-04 | 0.84 (0.76-0.93)        | G/A               | 0.060/0.07       | 7.51E-02 | 0.84 (0.69-1.02)        | G/A               | 0.040/0.05       | 8.79E-02 | 0.79 (0.61-1.04)        | G/A               | 0.050/0.05       | 6.62E-01 | 1.19 (0.55-2.53)        | G/A               | 0.160/0.15       | 5.13E-01 | 0.94 (0.77-1.14)        | G/A               | 0                |          |                         |

| SNP        | Position (bp) | European          |               |          |                         | African-American  |               |          |                         | Asian             |               |          |                         | Gullah            |               |          |                         | Hispanic          |               |          |                         | Amerindian        |               |                 |                         |
|------------|---------------|-------------------|---------------|----------|-------------------------|-------------------|---------------|----------|-------------------------|-------------------|---------------|----------|-------------------------|-------------------|---------------|----------|-------------------------|-------------------|---------------|----------|-------------------------|-------------------|---------------|-----------------|-------------------------|
|            |               | alleles (maj/min) | MAF case/ctrl | P        | OR (95%CI) <sup>b</sup> | alleles (maj/min) | MAF case/ctrl | P        | OR (95%CI) <sup>b</sup> | alleles (maj/min) | MAF case/ctrl | P        | OR (95%CI) <sup>b</sup> | alleles (maj/min) | MAF case/ctrl | P        | OR (95%CI) <sup>b</sup> | alleles (maj/min) | MAF case/ctrl | P        | OR (95%CI) <sup>b</sup> | alleles (maj/min) | MAF case/ctrl | P               | OR (95%CI) <sup>b</sup> |
| rs2172625  | 84522286      | A/G               | 0.11/0.14     | 1.22E-05 | 0.79 (0.71-0.88)        | A/G               | 0.12/0.12     | 6.36E-01 | 1.04 (0.89-1.22)        | A/G               | 0.13/0.15     | 3.24E-02 | 0.84 (0.71-0.99)        | A/G               | 0.13/0.14     | 6.15E-01 | 0.88 (0.53-1.46)        | A/G               | 0.17/0.16     | 7.20E-01 | 0.96 (0.79-1.17)        | A/G               | 0.15/0.21     | 1.76E-02        | 0.64 (0.45-0.93)        |
| rs2970094  | 84522327      | A/G               | 0.12/0.15     | 7.27E-05 | 0.81 (0.73-0.9)         | -                 | -             | -        | -                       | G/A               | 0.14/0.16     | 1.18E-01 | 0.88 (0.75-1.03)        | A/G               | 0.15/0.16     | 6.20E-01 | 0.99 (0.6-1.62)         | G/C               | 0.19/0.17     | 6.05E-01 | 0.95 (0.78-1.16)        | G/C               | 0.15/0.21     | 2.99E-02        | 0.67 (0.47-0.96)        |
| rs39280    | 84522499      | G/C               | 0.12/0.14     | 3.74E-04 | 0.83 (0.75-0.92)        | G/C               | 0.13/0.13     | 6.95E-01 | 1.03 (0.88-1.2)         | G/C               | 0.14/0.16     | 5.39E-02 | 0.86 (0.73-1.0)         | G/C               | 0.13/0.14     | 9.38E-01 | 0.98 (0.59-1.62)        | G/C               | 0.17/0.16     | 5.78E-01 | 0.95 (0.78-1.15)        | G/C               | 0.15/0.20     | 7.48E-02        | 0.72 (0.51-1.03)        |
| rs383425   | 84522540      | A/G               | 0.50/0.47     | 1.56E-03 | 1.12 (1.04-1.2)         | G/A               | 0.47/0.48     | 6.75E-01 | 0.98 (0.88-1.09)        | G/A               | 0.45/0.46     | 8.47E-01 | 0.99 (0.89-1.1)         | -                 | -             | -        | -                       | G/C               | 0.43/0.47     | 2.91E-01 | 0.93 (0.81-1.07)        | G/C               | 0.43/0.39     | 4.89E-01        | 1.1 (0.84-1.44)         |
| rs2709092  | 84522649      | -                 | -             | -        | -                       | G/A               | 0.04/0.04     | 7.25E-01 | 1.05 (0.82-1.34)        | -                 | -             | -        | -                       | G/A               | 0.06/0.04     | 2.97E-01 | 1.67 (0.71-3.91)        | -                 | -             | -        | -                       | -                 | -             | -               | -                       |
| rs524432   | 84523155      | A/G               | 0.11/0.14     | 2.90E-04 | 0.83 (0.75-0.92)        | A/G               | 0.13/0.13     | 6.93E-01 | 1.03 (0.89-1.2)         | A/G               | 0.14/0.17     | 5.09E-02 | 0.86 (0.74-1.0)         | A/G               | 0.13/0.14     | 6.75E-01 | 0.9 (0.55-1.48)         | A/G               | 0.17/0.16     | 4.93E-01 | 0.94 (0.77-1.13)        | A/G               | 0.16/0.21     | 5.99E-02        | 0.71 (0.51-1.01)        |
| rs38898    | 84523302      | C/A               | 0.11/0.14     | 1.23E-04 | 0.82 (0.74-0.91)        | C/A               | 0.13/0.13     | 7.05E-01 | 1.01 (0.87-1.17)        | C/A               | 0.14/0.16     | 6.89E-02 | 0.86 (0.74-1.0)         | C/A               | 0.13/0.14     | 7.91E-01 | 0.93 (0.57-1.54)        | C/A               | 0.17/0.16     | 4.64E-01 | 0.93 (0.77-1.13)        | C/A               | 0.15/0.20     | 4.89E-02        | 0.7 (0.49-1)            |
| rs411221   | 84523460      | C/G               | 0.11/0.13     | 1.43E-04 | 0.82 (0.74-0.91)        | C/G               | 0.16/0.16     | 6.22E-01 | 1.06 (0.92-1.22)        | C/G               | 0.13/0.15     | 4.07E-02 | 0.85 (0.72-0.99)        | C/G               | 0.16/0.17     | 9.18E-01 | 0.98 (0.62-1.55)        | C/G               | 0.17/0.16     | 4.22E-01 | 0.92 (0.76-1.12)        | C/G               | 0.15/0.19     | 1.32E-01        | 0.75 (0.52-1.09)        |
| rsR78453   | 84523664      | A/G               | 0.37/0.38     | 7.31E-01 | 0.99 (0.92-1.06)        | A/G               | 0.37/0.38     | 6.42E-01 | 0.98 (0.87-1.09)        | A/G               | 0.40/0.38     | 1.25E-01 | 0.9 (0.98-1.22)         | A/G               | 0.25/0.32     | 5.53E-02 | 0.69 (0.47-1.01)        | A/G               | 0.39/0.35     | 2.42E-02 | 1.19 (1.02-1.38)        | A/G               | 0.40/0.38     | 2.42E-01        | 1.18 (0.91-1.55)        |
| rsR78454   | 84523673      | A/G               | 0.24/0.24     | 9.76E-01 | 1 (0.92-1.08)           | A/G               | 0.06/0.05     | 2.85E-01 | 1.13 (0.9-1.42)         | A/G               | 0.09/0.09     | 6.62E-01 | 1.06 (0.79-1.16)        | A/G               | 0.03/0.03     | 9.03E-01 | 0.94 (0.33-2.65)        | A/G               | 0.18/0.16     | 2.82E-01 | 1.11 (0.92-1.34)        | A/G               | 0.15/0.14     | 7.94E-01        | 1.05 (0.73-1.52)        |
| rs11860480 | 84523959      | A/C               | 0.25/0.28     | 3.66E-04 | 0.87 (0.8-0.94)         | A/C               | 0.32/0.33     | 2.32E-01 | 0.94 (0.84-1.04)        | A/C               | 0.45/0.45     | 7.71E-01 | 1.02 (0.91-1.14)        | A/C               | 0.29/0.37     | 6.94E-02 | 0.71 (0.49-1.03)        | A/C               | 0.37/0.33     | 2.44E-01 | 1.09 (0.94-1.27)        | A/C               | 0.40/0.44     | 0.9 (0.69-1.19) |                         |
| rs11860517 | 84524000      | A/G               | 0.13/0.13     | 8.09E-01 | 0.99 (0.89-1.09)        | A/G               | 0.22/0.23     | 3.56E-01 | 0.94 (0.84-1.07)        | A/G               | 0.30/0.29     | 1.11E-01 | 1.1 (0.98-1.25)         | A/G               | 0.20/0.27     | 7.44E-02 | 0.68 (0.45-1.04)        | A/G               | 0.20/0.17     | 5.06E-02 | 1.2 (1.1-1.45)          | A/G               | 0.25/0.24     | 4.36E-01        | 1.13 (0.83-1.54)        |
| rs1117418  | 84524028      | A/G               | 0.14/0.15     | 3.24E-01 | 0.95 (0.86-1.05)        | A/G               | 0.22/0.23     | 4.13E-01 | 0.95 (0.84-1.07)        | A/C               | 0.31/0.29     | 7.70E-02 | 1.11 (0.99-1.25)        | A/C               | 0.19/0.26     | 7.09E-02 | 0.68 (0.45-1.03)        | A/C               | 0.20/0.17     | 1.36E-01 | 1.15 (0.96-1.38)        | A/C               | 0.25/0.24     | 3.55E-01        | 1.16 (0.85-1.57)        |
| rs12051539 | 84524038      | G/C               | 0.01/0.01     | 3.26E-01 | 1.16 (0.86-1.56)        | G/C               | 0.14/0.15     | 4.57E-01 | 0.95 (0.82-1.09)        | G/C               | 0.12/0.13     | 5.80E-01 | 0.95 (0.81-1.13)        | G/C               | 0.12/0.20     | 2.18E-02 | 0.58 (0.36-0.92)        | G/C               | 0.12/0.09     | 1.70E-01 | 1.18 (0.93-1.51)        | G/C               | 0.16/0.16     | 5.14E-01        | 1.13 (0.79-1.61)        |
| rsR78529   | 84524187      | G/C               | 0.13/0.13     | 7.28E-01 | 0.96 (0.89-1.09)        | G/C               | 0.22/0.23     | 3.57E-01 | 0.94 (0.84-1.07)        | G/C               | 0.31/0.28     | 4.36E-02 | 1.13 (1.0-1.28)         | G/C               | 0.20/0.26     | 6.88E-02 | 0.68 (0.46-1.03)        | G/C               | 0.20/0.17     | 1.16E-01 | 1.16 (0.96-1.4)         | G/C               | 0.25/0.23     | 2.19E-01        | 1.22 (0.89-1.67)        |
| rsR78528   | 84524211      | G/A               | 0.02/0.01     | 1.91E-01 | 1.22 (0.91-1.63)        | -                 | -             | -        | -                       | G/A               | 0.13/0.13     | 5.88E-01 | 0.96 (0.81-1.13)        | G/A               | 0.17/0.24     | 6.55E-02 | 0.67 (0.44-1.03)        | G/A               | 0.12/0.09     | 1.16E-01 | 1.21 (0.95-1.53)        | G/A               | 0.16/0.17     | 8.14E-01        | 1.05 (0.72-1.51)        |
| rsR78527   | 84524231      | G/A               | 0.02/0.01     | 1.70E-01 | 1.23 (0.92-1.65)        | G/A               | 0.15/0.16     | 4.24E-01 | 0.94 (0.82-1.09)        | G/A               | 0.13/0.13     | 7.43E-01 | 0.97 (0.83-1.15)        | G/A               | 0.13/0.22     | 1.18E-02 | 0.55 (0.35-0.88)        | G/A               | 0.12/0.09     | 1.33E-01 | 1.2 (0.95-1.51)         | G/A               | 0.16/0.17     | 8.94E-01        | 1.03 (0.71-1.48)        |
| rs119030   | 84524302      | G/A               | 0.30/0.27     | 8.59E-05 | 1.17 (1.08-1.26)        | A/G               | 0.41/0.45     | 6.85E-01 | 0.84 (0.75-0.93)        | G/A               | 0.40/0.38     | 3.20E-01 | 1.06 (0.95-1.19)        | A/G               | 0.35/0.39     | 3.69E-01 | 0.85 (0.59-1.21)        | A/G               | 0.35/0.31     | 7.20E-02 | 1.15 (0.99-1.33)        | G/A               | 0.34/0.28     | 1.29E-01        | 1.25 (0.94-1.66)        |
| rs1298341  | 84524541      | C/A               | 0.10/0.11     | 2.87E-01 | 0.94 (0.84-1.05)        | C/A               | 0.02/0.02     | 6.43E-02 | 0.7 (0.48-1.02)         | C/A               | 0.18/0.15     | 4.85E-03 | 1.24 (1.07-1.44)        | -                 | -             | -        | -                       | C/A               | 0.07/0.07     | 6.95E-01 | 1.06 (0.81-1.39)        | C/A               | 0.08/0.07     | 4.50E-01        | 1.21 (0.74-2)           |
| rs9936079  | 84525095      | G/A               | 0.17/0.22     | 3.96E-09 | 0.77 (0.7-0.84)         | -                 | -             | -        | -                       | G/A               | 0.07/0.09     | 2.95E-03 | 0.73 (0.59-0.9)         | -                 | -             | -        | -                       | G/A               | 0.18/0.18     | 6.97E-01 | 0.96 (0.8-1.16)         | G/A               | 0.18/0.23     | 1.67E-01        | 0.79 (0.56-1.1)         |
| rs447632   | 84525141      | A/G               | 0.42/0.39     | 2.65E-04 | 1.14 (1.06-1.22)        | G/A               | 0.41/0.44     | 3.71E-03 | 0.86 (0.78-0.95)        | G/A               | 0.42/0.47     | 9.43E-04 | 0.83 (0.74-0.92)        | G/A               | 0.38/0.43     | 1.87E-01 | 0.79 (0.56-1.12)        | A/G               | 0.42/0.39     | 4.66E-02 | 1.16 (1.1-1.33)         | A/G               | 0.42/0.34     | 6.32E-02        | 1.29 (0.99-1.69)        |
| rs2934498  | 84525783      | A/G               | 0.31/0.27     | 5.96E-06 | 1.19 (1.11-1.29)        | G/A               | 0.44/0.48     | 3.92E-04 | 0.83 (0.75-0.92)        | A/G               | 0.40/0.38     | 2.09E-01 | 1.08 (0.96-1.21)        | G/A               | 0.39/0.44     | 1.96E-01 | 0.79 (0.55-1.13)        | A/G               | 0.39/0.31     | 6.15E-02 | 1.15 (0.99-1.33)        | A/G               | 0.33/0.27     | 1.23E-01        | 1.25 (0.94-1.66)        |
| rs419749   | 84526058      | G/A               | 0.39/0.39     | 5.34E-01 | 1.02 (0.95-1.1)         | G/A               | 0.09/0.11     | 0.74E-01 | 0.73 (0.63-0.83)        | G/A               | 0.22/0.24     | 1.69E-01 | 0.91 (0.8-1.04)         | G/A               | 0.06/0.05     | 7.54E-01 | 1.13 (0.53-2.41)        | G/A               | 0.27/0.34     | 1.49E-03 | 0.78 (0.67-0.91)        | G/A               | 0.24/0.26     | 1.95E-01        | 0.8 (0.58-1.12)         |
| rs439885   | 84526175      | G/A               | 0.31/0.27     | 1.16E-05 | 1.19 (1.1-1.28)         | A/G               | 0.43/0.47     | 5.59E-04 | 0.83 (0.75-0.92)        | G/A               | 0.40/0.38     | 1.98E-01 | 1.08 (0.96-1.21)        | A/G               | 0.38/0.44     | 1.70E-01 | 0.78 (0.54-1.1)         | G/A               | 0.35/0.31     | 6.44E-02 | 1.15 (0.99-1.33)        | G/A               | 0.33/0.28     | 1.93E-01        | 1.24 (0.93-1.64)        |
| rs4843865  | 84526806      | T/A               | 0.17/0.21     | 2.93E-08 | 0.78 (0.72-0.85)        | T/A               | 0.13/0.13     | 6.64E-01 | 0.97 (0.83-1.13)        | T/A               | 0.07/0.09     | 1.46E-02 | 0.78 (0.63-0.95)        | T/A               | 0.13/0.12     | 8.22E-01 | 1.06 (0.63-1.79)        | T/A               | 0.19/0.18     | 9.15E-01 | 1.01 (0.84-1.21)        | T/A               | 0.19/0.24     | 2.16E-01        | 0.77 (0.55-1.07)        |
| rs8052690  | 84527239      | A/G               | 0.18/0.21     | 5.69E-06 | 0.79 (0.72-0.86)        | A/G               | 0.15/0.15     | 6.58E-01 | 1.07 (0.84-1.32)        | A/G               | 0.07/0.09     | 5.28E-03 | 0.74 (0.61-0.92)        | A/G               | 0.14/0.15     | 8.60E-01 | 0.96 (0.59-1.56)        | A/G               | 0.19/0.18     | 9.52E-01 | 1.01 (0.84-1.21)        | A/G               | 0.19/0.24     | 1.75E-01        | 0.8 (0.58-1.1)          |
| rs186249   | 84528397      | G/C               | 0.30/0.26     | 1.68E-05 | 1.19 (1.1-1.28)         | G/C               | 0.30/0.27     | 6.83E-02 | 1.15 (1.03-1.29)        | G/C               | 0.31/0.30     | 9.37E-01 | 1.01 (0.89-1.13)        | G/C               | 0.30/0.26     | 3.42E-01 | 1.21 (0.82-1.78)        | G/C               | 0.30/0.26     | 2.29E-02 | 1.2 (1.03-1.4)          | G/C               | 0.28/0.25     | 2.48E-01        | 1.19 (0.89-1.61)        |
| rs12149636 | 84528721      | C/G               | 0.29/0.33     | 9.02E-07 | 0.83 (0.77-0.89)        | C/G               | 0.30/0.32     | 5.56E-02 | 0.9 (0.8-1.0)           | C/G               | 0.38/0.38     | 8.25E-01 | 1.01 (0.9-1.13)         | C/G               | 0.27/0.35     | 3.26E-02 | 0.65 (0.44-0.96)        | C/G               | 0.38/0.34     | 1.87E-01 | 1.11 (0.95-1.29)        | C/G               | 0.43/0.46     | 7.68E-01        | 0.96 (0.73-1.26)        |
| rs305067   | 84529341      | G/C               | 0.36/0.36     | 7.55E-01 | 1.01 (0.94-1.09)        | G/C               | 0.08/0.09     | 4.14E-02 | 0.79 (0.66-0.91)        | G/C               | 0.12/0.12     | 5.59E-01 | 0.95 (0.8-1.13)         | G/C               | 0.05/0.05     | 9.95E-02 | 1.02 (0.44-2.37)        | G/C               | 0.21/0.28     | 2.40E-02 | 0.82 (0.69-0.97)        | G/C               | 0.18/0.19     | 2.29E-01        | 0.8 (0.55-1.15)         |
| rs1117420  | 84529423      | -                 | -             | -        | -                       | C/G               | 0.19/0.19     | 6.81E-01 | 0.97 (0.85-1.1)         | C/G               | 0.07/0.09     | 7.47E-03 | 0.75 (0.61-0.93)        | C/G               | 0.21/0.19     | 4.47E-01 | 1.19 (0.76-1.85)        | C/G               | 0.18/0.17     | 8.63E-01 | 1.02 (0.84-1.23)        | C/G               | 0.19/0.21     | 3.65E-01        | 0.85 (0.6-1.2)          |
| rs1117422  | 84529514      | G/C               | 0.17/0.21     | 9.37E-09 | 0.77 (0.71-0.84)        | G/C               | 0.13/0.13     | 6.76E-01 | 0.97 (0.83-1.13)        | G/C               | 0.07/0.09     | 1.32E-02 | 0.77 (0.63-0.94)        | G/C               | 0.13/0.13     | 9.73E-01 | 0.99 (0.59-1.66)        | G/C               | 0.18/0.17     | 6.99E-01 | 1.04 (0.86-1.25)        | G/C               | 0.19/0.23     | 2.43E-01        | 0.82 (0.59-1.14)        |
| rs1117425  | 84529772      | G/A               | 0.27/0.30     | 1.24E-06 | 0.83 (0.77-0.89)        | A/G               | 0.29/0.32     | 6.32E-02 | 0.9 (0.81-1.0)          | A/G               | 0.38/0.38     | 7.53E-01 | 1.02 (0.91-1.14)        | A/G               | 0.27/0.35     | 3.26E-02 | 0.65 (0.44-0.96)        | A/G               | 0.36/0.32     | 1.79E-01 | 1.11 (0.95-1.29)        | A/G               | 0.40/0.44     | 6.03E-01        | 0.93 (0.71-1.22)        |
| rs11648084 | 84530099      | G/A               | 0.27/0.30     | 9.35E-07 | 0.83 (0.77-0.89)        | A/G               | 0.29/0.32     | 6.33E-02 | 0.9 (0.81-1.0)          | A/G               | 0.38/0.38     | 7.53E-01 | 1.02 (0.91-1.14)        | A/G               | 0.27/0.35     | 3.26E-02 | 0.65 (0.44-0.96)        | A/G               | 0.36/0.32     | 1.88E-01 | 1.11 (0.95-1.29)        | A/G               | 0.40/0.45     | 5.68E-01        | 0.93 (0.71-1.22)        |
| rs11644034 | 84530113      | G/A               | 0.17/0.20     | 2.36E-08 | 0.78 (0.71-0.85)        | A/G               | 0.12/0.13     | 5.10E-01 | 0.95 (0.81-1.1)         | A/G               | 0.07/0.09     |          |                         |                   |               |          |                         |                   |               |          |                         |                   |               |                 |                         |

| SNP        | Position (bp) | European          |               |          |                         | African-American  |               |          |                         | Asian             |               |          |                         | Gullah            |               |          |                         | Hispanic          |               |          |                         | Amerindian        |               |          |                         |
|------------|---------------|-------------------|---------------|----------|-------------------------|-------------------|---------------|----------|-------------------------|-------------------|---------------|----------|-------------------------|-------------------|---------------|----------|-------------------------|-------------------|---------------|----------|-------------------------|-------------------|---------------|----------|-------------------------|
|            |               | alleles (maj/min) | MAF case/ctrl | P        | OR (95%CI) <sup>b</sup> | alleles (maj/min) | MAF case/ctrl | P        | OR (95%CI) <sup>b</sup> | alleles (maj/min) | MAF case/ctrl | P        | OR (95%CI) <sup>b</sup> | alleles (maj/min) | MAF case/ctrl | P        | OR (95%CI) <sup>b</sup> | alleles (maj/min) | MAF case/ctrl | P        | OR (95%CI) <sup>b</sup> | alleles (maj/min) | MAF case/ctrl | P        | OR (95%CI) <sup>b</sup> |
| rs4843877  | 84550733      | -                 | -             | -        | -                       | G/C               | 0.10/0.11     | 1.79E-01 | 0.89 (0.76-1.05)        | G/C               | 0.08/0.07     | 5.51E-01 | 1.07 (0.86-1.32)        | G/C               | 0.07/0.09     | 4.90E-01 | 0.81 (0.44-1.48)        | G/C               | 0.20/0.24     | 2.57E-01 | 0.91 (0.77-1.07)        | G/C               | 0.18/0.18     | 4.37E-01 | 0.87 (0.6-1.24)         |
| rs908983   | 84552021      | A/G               | 0.31/0.31     | 5.27E-01 | 1.02 (0.95-1.1)         | A/G               | 0.14/0.16     | 9.75E-02 | 0.89 (0.77-1.02)        | A/G               | 0.08/0.07     | 7.05E-01 | 1.04 (0.85-1.28)        | A/G               | 0.17/0.14     | 2.43E-01 | 1.33 (0.82-2.14)        | A/G               | 0.21/0.25     | 5.48E-01 | 0.95 (0.81-1.12)        | A/G               | 0.20/0.19     | 6.15E-01 | 0.92 (0.65-1.29)        |
| rs11859063 | 84552197      | -                 | -             | -        | -                       | A/C               | 0.05/0.06     | 1.22E-01 | 0.83 (0.66-1.05)        | -                 | -             | -        | -                       | A/C               | 0.10/0.05     | 2.55E-02 | 2.28 (1.11-4.69)        | -                 | -             | -        | -                       | -                 | -             | -        | -                       |
| rs883332   | 84552225      | -                 | -             | -        | -                       | A/G               | 0.03/0.03     | 2.50E-01 | 1.18 (0.89-1.57)        | A/G               | 0.17/0.16     | 3.79E-01 | 1.07 (0.92-1.24)        | A/G               | 0.04/0.07     | 8.12E-02 | 0.48 (0.21-1.1)         | A/G               | 0.05/0.04     | 2.52E-01 | 1.23 (0.86-1.75)        | A/G               | 0.07/0.06     | 4.04E-01 | 1.27 (0.73-2.22)        |
| rs8044852  | 84552728      | G/A               | 0.32/0.32     | 9.71E-01 | 1 (0.93-1.08)           | G/A               | 0.14/0.16     | 7.54E-02 | 0.88 (0.76-1.01)        | G/A               | 0.08/0.08     | 5.87E-01 | 1.06 (0.86-1.3)         | G/A               | 0.17/0.14     | 2.48E-01 | 1.33 (0.82-2.14)        | G/A               | 0.22/0.25     | 6.12E-01 | 0.96 (0.82-1.13)        | G/A               | 0.21/0.19     | 9.54E-01 | 0.99 (0.7-1.4)          |

Table S4. IRF8—Imputed Data for Europeans

| SNP        | Position (bp) | A2_major | A1_minor | MAF_case | MAF_ctrl | P        | OR     | L95    | U95    |
|------------|---------------|----------|----------|----------|----------|----------|--------|--------|--------|
| rs4843869  | 84532642      | G        | A        | 0.1625   | 0.2018   | 7.61E-10 | 0.76   | 0.6964 | 0.8295 |
| rs4843323  | 84532462      | C        | T        | 0.162    | 0.2012   | 7.71E-10 | 0.7598 | 0.6961 | 0.8293 |
| rs4843868  | 84530902      | C        | T        | 0.1627   | 0.2022   | 8.57E-10 | 0.761  | 0.6974 | 0.8304 |
| rs7202472  | 84535003      | G        | T        | 0.1541   | 0.1919   | 1.08E-09 | 0.7571 | 0.6924 | 0.828  |
| rs11641155 | 84530653      | A        | G        | 0.1633   | 0.2023   | 1.23E-09 | 0.7632 | 0.6995 | 0.8327 |
| rs7205434  | 84530696      | C        | G        | 0.1633   | 0.2023   | 1.23E-09 | 0.7632 | 0.6995 | 0.8327 |
| rs9936079  | 84525095      | G        | A        | 0.1752   | 0.2174   | 1.23E-09 | 0.7646 | 0.7012 | 0.8338 |
| rs11641153 | 84530641      | A        | G        | 0.1633   | 0.2023   | 1.31E-09 | 0.7636 | 0.6998 | 0.8331 |
| rs13335265 | 84530311      | G        | C        | 0.1564   | 0.1962   | 1.64E-09 | 0.7586 | 0.6934 | 0.8299 |
| rs731708   | 84538035      | C        | A        | 0.1555   | 0.1924   | 1.81E-09 | 0.76   | 0.695  | 0.8311 |
| rs11117422 | 84529514      | G        | C        | 0.1663   | 0.2059   | 2.17E-09 | 0.7658 | 0.7017 | 0.8357 |
| rs12444221 | 84524786      | C        | T        | 0.1736   | 0.2131   | 3.92E-09 | 0.7742 | 0.711  | 0.8431 |
| rs12711490 | 84530529      | T        | C        | 0.1665   | 0.2044   | 5.25E-09 | 0.7725 | 0.7084 | 0.8424 |
| rs11644034 | 84530113      | G        | A        | 0.1664   | 0.2041   | 5.85E-09 | 0.7724 | 0.708  | 0.8425 |
| rs4843865  | 84526806      | A        | T        | 0.175    | 0.2137   | 9.45E-09 | 0.7795 | 0.716  | 0.8487 |
| 84527141   | 84527141      | A        | C        | 0.175    | 0.2133   | 1.11E-08 | 0.7807 | 0.7172 | 0.8499 |
| rs13330932 | 84532008      | C        | T        | 0.2502   | 0.2915   | 1.55E-08 | 0.8016 | 0.7425 | 0.8655 |
| rs8052690  | 84527239      | A        | G        | 0.1762   | 0.2139   | 1.70E-08 | 0.7834 | 0.7196 | 0.8527 |
| rs4843322  | 84532386      | A        | G        | 0.2634   | 0.3014   | 1.50E-07 | 0.8181 | 0.7591 | 0.8818 |
| rs2934497  | 84525379      | C        | T        | 0.2714   | 0.231    | 2.62E-07 | 1.242  | 1.144  | 1.349  |
| rs12149642 | 84528922      | C        | T        | 0.2637   | 0.3038   | 2.94E-07 | 0.8198 | 0.7599 | 0.8845 |
| rs2970091  | 84525387      | G        | A        | 0.2765   | 0.2363   | 2.96E-07 | 1.238  | 1.141  | 1.343  |
| rs12600127 | 84530280      | C        | G        | 0.2649   | 0.3018   | 3.14E-07 | 0.8222 | 0.7628 | 0.8862 |
| 84529029   | 84529029      | A        | C        | 0.2739   | 0.3129   | 3.27E-07 | 0.8161 | 0.7549 | 0.8823 |
| 84529030   | 84529030      | A        | C        | 0.2739   | 0.3129   | 3.27E-07 | 0.8161 | 0.7549 | 0.8823 |
| rs11643999 | 84530070      | G        | A        | 0.2651   | 0.3016   | 3.66E-07 | 0.8235 | 0.7641 | 0.8875 |
| rs11117423 | 84529682      | T        | C        | 0.2626   | 0.2993   | 3.76E-07 | 0.8228 | 0.7632 | 0.8871 |
| rs11117421 | 84529461      | G        | A        | 0.2645   | 0.3009   | 3.83E-07 | 0.8236 | 0.7642 | 0.8877 |
| rs11117419 | 84529383      | C        | G        | 0.2645   | 0.3008   | 3.99E-07 | 0.8239 | 0.7644 | 0.888  |
| rs11648012 | 84529908      | C        | T        | 0.2651   | 0.3013   | 4.47E-07 | 0.8248 | 0.7653 | 0.8888 |
| rs11117424 | 84529738      | A        | G        | 0.2653   | 0.3016   | 4.49E-07 | 0.8248 | 0.7653 | 0.8888 |
| rs11648084 | 84530099      | C        | T        | 0.2653   | 0.3016   | 4.53E-07 | 0.8247 | 0.7652 | 0.8888 |
| rs11117425 | 84529772      | C        | T        | 0.2655   | 0.3016   | 5.81E-07 | 0.826  | 0.7663 | 0.8903 |
| 84524049   | 84524049      | A        | G        | 0.104    | 0.1319   | 7.08E-07 | 0.7668 | 0.6904 | 0.8516 |
| rs58980382 | 84523934      | C        | T        | 0.09778  | 0.1244   | 7.31E-07 | 0.7597 | 0.6814 | 0.8469 |
| rs12149636 | 84528721      | C        | G        | 0.2927   | 0.3297   | 9.52E-07 | 0.8337 | 0.7752 | 0.8966 |
| rs8059144  | 84527977      | T        | C        | 0.3019   | 0.3392   | 9.62E-07 | 0.8352 | 0.7771 | 0.8976 |
| rs4843867  | 84528219      | C        | G        | 0.3021   | 0.3396   | 9.88E-07 | 0.8354 | 0.7774 | 0.8978 |
| rs4843866  | 84528151      | C        | T        | 0.3022   | 0.3396   | 9.99E-07 | 0.8355 | 0.7774 | 0.8979 |
| rs12598434 | 84530560      | G        | T        | 0.2644   | 0.2999   | 1.03E-06 | 0.8294 | 0.7694 | 0.894  |
| rs8045825  | 84527979      | C        | G        | 0.3022   | 0.3393   | 1.08E-06 | 0.8359 | 0.7778 | 0.8983 |
| rs9927123  | 84531682      | A        | G        | 0.3079   | 0.3429   | 1.31E-06 | 0.8362 | 0.7777 | 0.899  |
| 84528857   | 84528857      | A        | C        | 0.2709   | 0.307    | 1.69E-06 | 0.8316 | 0.7712 | 0.8968 |
| rs16940044 | 84525266      | A        | G        | 0.2745   | 0.2372   | 2.16E-06 | 1.218  | 1.123  | 1.322  |
| rs74032085 | 84525245      | T        | C        | 0.276    | 0.2384   | 2.25E-06 | 1.217  | 1.122  | 1.32   |
| rs8046526  | 84509136      | C        | T        | 0.1372   | 0.1624   | 3.96E-06 | 0.8019 | 0.7301 | 0.8807 |
| rs2970090  | 84525392      | G        | A        | 0.4098   | 0.3685   | 4.82E-06 | 1.186  | 1.102  | 1.276  |
| rs8058904  | 84509183      | A        | G        | 0.1367   | 0.1616   | 5.19E-06 | 0.8037 | 0.7316 | 0.8829 |
| rs2172625  | 84522286      | T        | C        | 0.1125   | 0.1384   | 5.52E-06 | 0.7875 | 0.7105 | 0.873  |
| rs66804793 | 84525190      | G        | A        | 0.2831   | 0.2471   | 6.16E-06 | 1.202  | 1.11   | 1.302  |
| rs66509440 | 84525182      | C        | T        | 0.2831   | 0.2471   | 6.36E-06 | 1.201  | 1.109  | 1.301  |
| rs305095   | 84535500      | C        | T        | 0.3155   | 0.2804   | 7.44E-06 | 1.186  | 1.101  | 1.278  |
| rs2934498  | 84525783      | A        | G        | 0.3066   | 0.2725   | 7.90E-06 | 1.186  | 1.101  | 1.279  |
| rs305066   | 84530277      | C        | T        | 0.3283   | 0.2937   | 8.18E-06 | 1.183  | 1.099  | 1.274  |
| rs305097   | 84535412      | G        | A        | 0.3158   | 0.2806   | 8.78E-06 | 1.185  | 1.1    | 1.277  |
| rs396987   | 84526435      | A        | G        | 0.3048   | 0.2706   | 8.89E-06 | 1.185  | 1.1    | 1.278  |
| rs450443   | 84526392      | T        | G        | 0.3048   | 0.2707   | 9.73E-06 | 1.184  | 1.099  | 1.277  |
| rs385344   | 84525105      | C        | G        | 0.3042   | 0.2708   | 1.37E-05 | 1.181  | 1.096  | 1.273  |
| rs439885   | 84526175      | G        | A        | 0.3054   | 0.2726   | 1.50E-05 | 1.18   | 1.095  | 1.272  |
| rs34337659 | 84525158      | T        | C        | 0.3054   | 0.2723   | 1.55E-05 | 1.179  | 1.094  | 1.271  |
| rs366078   | 84522064      | T        | C        | 0.1156   | 0.1406   | 1.57E-05 | 0.8009 | 0.7241 | 0.8858 |
| rs11642286 | 84479110      | A        | G        | 0.05236  | 0.0675   | 1.99E-05 | 0.7313 | 0.6333 | 0.8444 |
| rs34912238 | 84559404      | C        | T        | 0.1589   | 0.189    | 2.15E-05 | 0.8177 | 0.7453 | 0.8973 |
| rs305060   | 84533417      | T        | C        | 0.4858   | 0.4467   | 2.32E-05 | 1.158  | 1.082  | 1.239  |
| rs186249   | 84528397      | G        | C        | 0.2954   | 0.2624   | 2.37E-05 | 1.179  | 1.092  | 1.273  |

| SNP        | Position (bp) | A2_major | A1_minor | MAF_case | MAF_ctrl | P         | OR     | L95    | U95    |
|------------|---------------|----------|----------|----------|----------|-----------|--------|--------|--------|
| rs2970094  | 84522327      | G        | A        | 0.1229   | 0.148    | 2.41E-05  | 0.8012 | 0.7229 | 0.888  |
| 84476754   | 84476754      | A        | C        | 0.04983  | 0.06441  | 2.68E-05  | 0.7294 | 0.6295 | 0.8451 |
| rs731709   | 84538088      | T        | C        | 0.316    | 0.2832   | 2.70E-05  | 1.173  | 1.089  | 1.263  |
| rs11117411 | 84483439      | C        | T        | 0.05095  | 0.06545  | 2.79E-05  | 0.731  | 0.6314 | 0.8464 |
| rs305059   | 84533519      | G        | A        | 0.4891   | 0.4509   | 4.83E-05  | 1.153  | 1.076  | 1.235  |
| rs388988   | 84523302      | G        | T        | 0.1143   | 0.1382   | 5.09E-05  | 0.8102 | 0.7317 | 0.897  |
| rs11863590 | 84503995      | A        | G        | 0.2332   | 0.2053   | 5.11E-05  | 1.187  | 1.092  | 1.289  |
| rs305063   | 84532158      | G        | T        | 0.3184   | 0.2877   | 5.15E-05  | 1.168  | 1.083  | 1.258  |
| rs437291   | 84525009      | T        | C        | 0.4359   | 0.4011   | 5.33E-05  | 1.153  | 1.076  | 1.236  |
| rs12923978 | 84503825      | T        | C        | 0.2326   | 0.2051   | 5.87E-05  | 1.185  | 1.091  | 1.288  |
| 84522577   | 84522577      | A        | C        | 0.1118   | 0.1347   | 8.20E-05  | 0.8141 | 0.735  | 0.9019 |
| 84523433   | 84523433      | A        | C        | 0.1029   | 0.1243   | 8.60E-05  | 0.8059 | 0.7236 | 0.8975 |
| rs523642   | 84523096      | G        | A        | 0.1119   | 0.1346   | 9.48E-05  | 0.8155 | 0.7362 | 0.9035 |
| rs419030   | 84524302      | G        | A        | 0.299    | 0.2685   | 9.97E-05  | 1.161  | 1.077  | 1.252  |
| rs524432   | 84523155      | T        | C        | 0.1143   | 0.1368   | 0.0001164 | 0.819  | 0.7399 | 0.9065 |
| rs385989   | 84526509      | T        | G        | 0.4413   | 0.4086   | 0.0001214 | 1.145  | 1.069  | 1.227  |
| rs447632   | 84525141      | A        | G        | 0.4186   | 0.3876   | 0.0001484 | 1.144  | 1.067  | 1.226  |
| 84524750   | 84524750      | C        | T        | 0.01843  | 0.02731  | 0.0001692 | 0.642  | 0.5096 | 0.8088 |
| 84524668   | 84524668      | A        | C        | 0.4204   | 0.389    | 0.0001723 | 1.144  | 1.066  | 1.226  |
| rs35929052 | 84551985      | C        | T        | 0.09222  | 0.1127   | 0.0001863 | 0.8041 | 0.7173 | 0.9015 |
| rs12445476 | 84548770      | T        | G        | 0.1571   | 0.1825   | 0.0002197 | 0.8432 | 0.7703 | 0.9231 |
| 84524665   | 84524665      | A        | C        | 0.4214   | 0.3905   | 0.00022   | 1.141  | 1.064  | 1.223  |
| 84524666   | 84524666      | A        | C        | 0.4214   | 0.3905   | 0.00022   | 1.141  | 1.064  | 1.223  |
| rs399280   | 84522499      | C        | G        | 0.1153   | 0.1369   | 0.0002784 | 0.8274 | 0.747  | 0.9164 |
| rs11117426 | 84547768      | T        | C        | 0.1601   | 0.1864   | 0.0002989 | 0.8468 | 0.7738 | 0.9266 |
| 84524664   | 84524664      | A        | C        | 0.4053   | 0.3747   | 0.0003198 | 1.141  | 1.062  | 1.227  |
| rs8052064  | 84502732      | C        | T        | 0.1174   | 0.1342   | 0.0003288 | 0.8294 | 0.7489 | 0.9185 |
| rs11642873 | 84549206      | A        | C        | 0.1538   | 0.1786   | 0.0003345 | 0.8451 | 0.7709 | 0.9265 |
| rs62052474 | 84463910      | G        | A        | 0.0688   | 0.08125  | 0.0003501 | 0.7911 | 0.6957 | 0.8996 |
| rs376783   | 84475324      | G        | A        | 0.2531   | 0.2266   | 0.0004293 | 1.153  | 1.065  | 1.248  |
| rs11117427 | 84548058      | G        | A        | 0.1591   | 0.1842   | 0.0004352 | 0.849  | 0.775  | 0.9301 |
| rs11860480 | 84523959      | A        | C        | 0.2534   | 0.2793   | 0.0004983 | 0.8731 | 0.8088 | 0.9424 |
| rs403038   | 84506572      | G        | A        | 0.1209   | 0.1364   | 0.0005822 | 0.8394 | 0.7597 | 0.9274 |
| rs8054513  | 84506608      | C        | G        | 0.1185   | 0.1342   | 0.0006321 | 0.8387 | 0.7582 | 0.9277 |
| rs305068   | 84507397      | A        | G        | 0.1184   | 0.1335   | 0.0007412 | 0.8404 | 0.7597 | 0.9297 |
| rs11648716 | 84464117      | A        | G        | 0.07127  | 0.08309  | 0.000747  | 0.8044 | 0.7088 | 0.9129 |
| rs8045988  | 84521891      | G        | A        | 0.08755  | 0.07153  | 0.0007637 | 1.243  | 1.095  | 1.411  |
| rs62052556 | 84497511      | C        | T        | 0.118    | 0.1336   | 0.0008416 | 0.8412 | 0.76   | 0.9311 |
| rs11649271 | 84505830      | T        | C        | 0.1171   | 0.1321   | 0.0008825 | 0.8419 | 0.7606 | 0.9317 |
| rs305070   | 84506925      | A        | G        | 0.1283   | 0.144    | 0.0009334 | 0.8477 | 0.7687 | 0.9348 |
| rs903203   | 84506142      | G        | A        | 0.3647   | 0.3387   | 0.001278  | 1.126  | 1.048  | 1.211  |
| rs11642583 | 84496096      | T        | G        | 0.1229   | 0.1375   | 0.001379  | 0.8501 | 0.7695 | 0.939  |
| rs305071   | 84506772      | G        | A        | 0.1075   | 0.1234   | 0.001382  | 0.8395 | 0.7542 | 0.9345 |
| rs2270501  | 84490489      | C        | T        | 0.2055   | 0.1834   | 0.001638  | 1.148  | 1.054  | 1.252  |
| rs28368112 | 84488458      | G        | C        | 0.2159   | 0.1925   | 0.0021    | 1.144  | 1.05   | 1.247  |
| rs9924484  | 84509239      | C        | G        | 0.08303  | 0.06649  | 0.002323  | 1.225  | 1.075  | 1.395  |
| rs9931687  | 84473282      | G        | A        | 0.2098   | 0.1877   | 0.002578  | 1.138  | 1.046  | 1.238  |
| rs3794662  | 84497151      | T        | A        | 0.04147  | 0.0332   | 0.002599  | 1.322  | 1.103  | 1.586  |
| rs9926664  | 84496256      | A        | G        | 0.1235   | 0.1374   | 0.002692  | 0.8585 | 0.7771 | 0.9485 |
| rs873616   | 84485667      | C        | G        | 0.2082   | 0.1861   | 0.002737  | 1.143  | 1.047  | 1.248  |
| rs9940980  | 84496182      | C        | T        | 0.1243   | 0.1379   | 0.002767  | 0.8593 | 0.7781 | 0.949  |
| rs11646550 | 84496336      | G        | A        | 0.1218   | 0.1355   | 0.0028    | 0.8586 | 0.7769 | 0.9489 |
| 84459157   | 84459157      | T        | G        | 0.06255  | 0.07265  | 0.002852  | 0.8112 | 0.707  | 0.9307 |
| rs16940005 | 84511183      | G        | C        | 0.1807   | 0.162    | 0.00299   | 1.145  | 1.047  | 1.253  |
| rs11117415 | 84508187      | A        | G        | 0.06527  | 0.05225  | 0.002993  | 1.247  | 1.078  | 1.442  |
| rs383425   | 84522540      | C        | T        | 0.4962   | 0.4722   | 0.003004  | 1.108  | 1.035  | 1.185  |
| rs16939967 | 84506974      | G        | T        | 0.1849   | 0.1666   | 0.003103  | 1.144  | 1.046  | 1.251  |
| rs12924316 | 84493764      | C        | T        | 0.2082   | 0.1871   | 0.003151  | 1.137  | 1.044  | 1.239  |
| rs925994   | 84503518      | C        | A        | 0.04251  | 0.03316  | 0.003239  | 1.31   | 1.095  | 1.569  |
| 84494863   | 84494863      | G        | C        | 0.04111  | 0.03297  | 0.00347   | 1.313  | 1.094  | 1.576  |
| rs60241040 | 84486065      | A        | G        | 0.2068   | 0.1852   | 0.00377   | 1.135  | 1.042  | 1.237  |
| rs9934699  | 84509137      | G        | A        | 0.0825   | 0.06676  | 0.004115  | 1.21   | 1.062  | 1.379  |
| rs9934701  | 84509148      | G        | A        | 0.0825   | 0.06676  | 0.004115  | 1.21   | 1.062  | 1.379  |
| rs16939917 | 84499921      | T        | A        | 0.04387  | 0.03603  | 0.004798  | 1.288  | 1.08   | 1.536  |
| rs10514610 | 84499676      | G        | C        | 0.04423  | 0.03609  | 0.005045  | 1.285  | 1.078  | 1.531  |

| SNP        | Position (bp) | A2_major | A1_minor | MAF_case | MAF_ctrl | P        | OR     | L95    | U95    |
|------------|---------------|----------|----------|----------|----------|----------|--------|--------|--------|
| rs35593615 | 84511410      | A        | G        | 0.1835   | 0.166    | 0.005064 | 1.136  | 1.039  | 1.241  |
| rs4843859  | 84489457      | C        | G        | 0.2229   | 0.2019   | 0.006057 | 1.124  | 1.034  | 1.221  |
| rs62051025 | 84537707      | C        | T        | 0.2224   | 0.201    | 0.006537 | 1.125  | 1.033  | 1.224  |
| rs3794661  | 84497167      | G        | A        | 0.04049  | 0.03345  | 0.007449 | 1.284  | 1.069  | 1.543  |
| rs11859433 | 84458903      | T        | C        | 0.06354  | 0.0718   | 0.008399 | 0.8343 | 0.7291 | 0.9546 |
| rs12929551 | 84510511      | C        | T        | 0.1836   | 0.1676   | 0.008597 | 1.126  | 1.031  | 1.231  |
| 84491082   | 84491082      | C        | A        | 0.03884  | 0.03146  | 0.009131 | 1.283  | 1.064  | 1.548  |
| rs9931862  | 84472878      | C        | T        | 0.21     | 0.1912   | 0.009514 | 1.119  | 1.028  | 1.218  |
| rs4843854  | 84460016      | G        | C        | 0.4532   | 0.4327   | 0.01052  | 1.093  | 1.021  | 1.17   |
| rs3794660  | 84500669      | G        | C        | 0.03818  | 0.03064  | 0.01088  | 1.277  | 1.058  | 1.542  |
| rs8064111  | 84504976      | C        | T        | 0.1106   | 0.121    | 0.01165  | 0.873  | 0.7855 | 0.9702 |
| rs12444486 | 84550150      | T        | C        | 0.4635   | 0.487    | 0.01169  | 0.9159 | 0.8554 | 0.9806 |
| rs11861580 | 84456048      | C        | G        | 0.06682  | 0.07468  | 0.01199  | 0.8433 | 0.7383 | 0.9632 |
| rs305084   | 84491669      | T        | C        | 0.1068   | 0.09728  | 0.01279  | 1.155  | 1.031  | 1.294  |
| rs4843320  | 84498514      | C        | T        | 0.1891   | 0.1717   | 0.01284  | 1.12   | 1.024  | 1.225  |
| rs56239618 | 84525421      | A        | G        | 0.1769   | 0.1595   | 0.01483  | 1.124  | 1.023  | 1.234  |
| rs10514611 | 84512743      | C        | T        | 0.2017   | 0.2144   | 0.01726  | 0.9036 | 0.8313 | 0.9822 |
| rs56250418 | 84530999      | G        | T        | 0.1969   | 0.1801   | 0.01811  | 1.111  | 1.018  | 1.212  |
| rs896263   | 84485020      | C        | G        | 0.2858   | 0.2661   | 0.01919  | 1.095  | 1.015  | 1.182  |
| rs62051024 | 84535456      | A        | C        | 0.199    | 0.1823   | 0.01992  | 1.109  | 1.016  | 1.21   |
| rs305087   | 84539747      | T        | C        | 0.1185   | 0.1345   | 0.02237  | 0.8831 | 0.7938 | 0.9825 |
| rs8064189  | 84509297      | T        | G        | 0.2202   | 0.2304   | 0.02383  | 0.9106 | 0.8396 | 0.9877 |
| rs11646027 | 84513898      | T        | C        | 0.2059   | 0.2171   | 0.02736  | 0.9111 | 0.8389 | 0.9897 |
| rs371800   | 84475621      | G        | T        | 0.04204  | 0.03645  | 0.03074  | 1.215  | 1.018  | 1.451  |
| rs401528   | 84482872      | C        | G        | 0.04459  | 0.03832  | 0.03346  | 1.206  | 1.015  | 1.433  |
| rs62052470 | 84461723      | G        | A        | 0.03543  | 0.04001  | 0.03366  | 0.8195 | 0.682  | 0.9847 |
| rs7204286  | 84514422      | C        | T        | 0.2077   | 0.2185   | 0.03458  | 0.9142 | 0.8412 | 0.9935 |
| 84478601   | 84478601      | A        | C        | 0.03841  | 0.03288  | 0.0346   | 1.22   | 1.015  | 1.467  |
| rs11117416 | 84515825      | C        | G        | 0.2076   | 0.2181   | 0.03496  | 0.915  | 0.8426 | 0.9938 |
| rs9923975  | 84469936      | A        | G        | 0.2024   | 0.186    | 0.03625  | 1.095  | 1.006  | 1.191  |
| rs9932835  | 84515425      | C        | G        | 0.2063   | 0.217    | 0.03713  | 0.9159 | 0.8432 | 0.9948 |
| rs12926601 | 84459167      | C        | T        | 0.2101   | 0.2014   | 0.04309  | 1.092  | 1.003  | 1.189  |
| rs438323   | 84483902      | T        | C        | 0.04006  | 0.03478  | 0.04499  | 1.202  | 1.004  | 1.44   |
| rs452532   | 84484267      | T        | G        | 0.04007  | 0.03479  | 0.04524  | 1.202  | 1.004  | 1.439  |
| rs428530   | 84480360      | A        | G        | 0.04118  | 0.03586  | 0.04593  | 1.199  | 1.003  | 1.433  |
| rs11648480 | 84517780      | C        | T        | 0.206    | 0.2158   | 0.04646  | 0.9193 | 0.8462 | 0.9987 |
| rs191022   | 84489633      | C        | G        | 0.2879   | 0.2709   | 0.04655  | 1.08   | 1.001  | 1.165  |
| rs4843860  | 84508422      | A        | G        | 0.2976   | 0.2837   | 0.04817  | 1.077  | 1.001  | 1.16   |
| rs4843861  | 84508477      | A        | T        | 0.3006   | 0.2869   | 0.04825  | 1.077  | 1.001  | 1.159  |
| rs437740   | 84483537      | T        | C        | 0.04005  | 0.03491  | 0.04838  | 1.199  | 1.001  | 1.435  |
| rs452478   | 84484245      | T        | G        | 0.04007  | 0.03492  | 0.05082  | 1.196  | 0.9994 | 1.432  |
| 84465151   | 84465151      | A        | C        | 0.2178   | 0.2092   | 0.05335  | 1.086  | 0.9988 | 1.18   |
| rs8052521  | 84516230      | G        | A        | 0.2295   | 0.2373   | 0.05544  | 0.9248 | 0.8537 | 1.002  |
| rs880365   | 84516863      | C        | T        | 0.2287   | 0.2364   | 0.06064  | 0.9262 | 0.8548 | 1.003  |
| rs384915   | 84477113      | G        | A        | 0.03858  | 0.03479  | 0.06272  | 1.189  | 0.9909 | 1.426  |
| 84552937   | 84552937      | T        | C        | 0.05107  | 0.05915  | 0.06621  | 0.8665 | 0.7436 | 1.01   |
| rs1021481  | 84516521      | G        | A        | 0.2305   | 0.2377   | 0.07053  | 0.9287 | 0.8572 | 1.006  |
| rs880366   | 84516939      | T        | C        | 0.2308   | 0.2377   | 0.0748   | 0.9299 | 0.8584 | 1.007  |
| rs8058349  | 84489530      | C        | G        | 0.06282  | 0.07001  | 0.0835   | 0.8848 | 0.7702 | 1.016  |
| rs880364   | 84516666      | A        | G        | 0.2314   | 0.238    | 0.08553  | 0.9322 | 0.8606 | 1.01   |
| rs1021480  | 84516471      | A        | G        | 0.228    | 0.2348   | 0.08786  | 0.9323 | 0.8602 | 1.01   |
| rs8056522  | 84464397      | T        | C        | 0.2068   | 0.1923   | 0.08917  | 1.076  | 0.9889 | 1.17   |
| rs1809094  | 84484727      | G        | A        | 0.2375   | 0.2232   | 0.1059   | 1.072  | 0.9854 | 1.166  |
| rs12930347 | 84461177      | T        | C        | 0.2337   | 0.2265   | 0.1093   | 1.068  | 0.9854 | 1.158  |
| rs394100   | 84484220      | G        | A        | 0.04359  | 0.03912  | 0.11     | 1.152  | 0.9685 | 1.37   |
| 84517870   | 84517870      | G        | A        | 0.0207   | 0.01589  | 0.1123   | 1.233  | 0.9521 | 1.597  |
| rs305086   | 84540022      | G        | A        | 0.1656   | 0.1569   | 0.1144   | 1.078  | 0.982  | 1.183  |
| rs16939945 | 84502750      | C        | T        | 0.02441  | 0.02835  | 0.1192   | 0.8464 | 0.6862 | 1.044  |
| rs305083   | 84493379      | A        | G        | 0.1623   | 0.169    | 0.1221   | 0.9298 | 0.8479 | 1.02   |
| rs750669   | 84470371      | A        | G        | 0.4971   | 0.4829   | 0.1226   | 1.055  | 0.9857 | 1.129  |
| rs4843856  | 84460058      | A        | C        | 0.5065   | 0.4924   | 0.124    | 1.054  | 0.9856 | 1.128  |
| rs391023   | 84485315      | C        | T        | 0.3903   | 0.3754   | 0.1261   | 1.056  | 0.9848 | 1.133  |
| rs2292980  | 84502577      | T        | C        | 0.3594   | 0.3446   | 0.1352   | 1.056  | 0.9832 | 1.133  |
| rs16939877 | 84475320      | T        | A        | 0.02443  | 0.02783  | 0.1421   | 0.8493 | 0.6829 | 1.056  |
| rs305062   | 84533003      | A        | G        | 0.01132  | 0.009026 | 0.1437   | 1.291  | 0.9167 | 1.819  |



| SNP        | Position (bp) | A2_major | A1_minor | MAF_case | MAF_ctrl | P      | OR     | L95    | U95   |
|------------|---------------|----------|----------|----------|----------|--------|--------|--------|-------|
| rs2292982  | 84502324      | T        | G        | 0.359    | 0.3451   | 0.1478 | 1.054  | 0.9816 | 1.132 |
| rs875527   | 84524231      | G        | A        | 0.01627  | 0.01189  | 0.1554 | 1.234  | 0.9235 | 1.648 |
| 84470606   | 84470606      | C        | A        | 0.4974   | 0.4845   | 0.1592 | 1.05   | 0.9812 | 1.123 |
| rs11640143 | 84546965      | T        | C        | 0.05975  | 0.06593  | 0.1697 | 0.9065 | 0.7881 | 1.043 |
| rs11649549 | 84493298      | T        | C        | 0.1662   | 0.1727   | 0.1745 | 0.9393 | 0.8582 | 1.028 |
| rs34318854 | 84472707      | T        | C        | 0.4917   | 0.4789   | 0.1793 | 1.048  | 0.9787 | 1.122 |
| rs34723871 | 84472711      | T        | C        | 0.4917   | 0.4789   | 0.1793 | 1.048  | 0.9787 | 1.122 |
| rs56143130 | 84472719      | T        | C        | 0.4917   | 0.4789   | 0.1793 | 1.048  | 0.9787 | 1.122 |
| rs55967832 | 84472469      | T        | C        | 0.4916   | 0.4787   | 0.1814 | 1.048  | 0.9785 | 1.122 |
| rs305077   | 84500967      | T        | C        | 0.3574   | 0.3447   | 0.1877 | 1.049  | 0.977  | 1.126 |
| rs7185918  | 84458566      | C        | T        | 0.2102   | 0.1983   | 0.1921 | 1.057  | 0.9725 | 1.149 |
| rs2361763  | 84550635      | C        | T        | 0.4442   | 0.4535   | 0.1936 | 0.9558 | 0.8928 | 1.023 |
| rs391525   | 84501940      | A        | G        | 0.3574   | 0.3452   | 0.194  | 1.048  | 0.9763 | 1.125 |
| rs16882    | 84493074      | T        | C        | 0.1676   | 0.1734   | 0.1948 | 0.9421 | 0.8608 | 1.031 |
| rs875528   | 84524211      | G        | A        | 0.01649  | 0.01228  | 0.1948 | 1.21   | 0.907  | 1.615 |
| 84529014   | 84529014      | C        | G        | 0.01615  | 0.01738  | 0.1964 | 0.8371 | 0.6392 | 1.096 |
| rs2270502  | 84490539      | C        | T        | 0.054    | 0.0591   | 0.2038 | 0.909  | 0.7846 | 1.053 |
| rs305082   | 84494479      | T        | C        | 0.1697   | 0.1748   | 0.2109 | 0.9443 | 0.8632 | 1.033 |
| rs1519978  | 84492712      | A        | T        | 0.166    | 0.1714   | 0.2304 | 0.9461 | 0.8643 | 1.036 |
| rs393512   | 84488072      | G        | C        | 0.06715  | 0.07252  | 0.2314 | 0.9219 | 0.807  | 1.053 |
| rs62051023 | 84530439      | C        | T        | 0.01304  | 0.009358 | 0.2341 | 1.217  | 0.8807 | 1.682 |
| rs11117428 | 84550330      | T        | C        | 0.2332   | 0.2261   | 0.2428 | 1.05   | 0.9672 | 1.141 |
| rs395922   | 84478180      | G        | C        | 0.03868  | 0.03717  | 0.2514 | 1.114  | 0.9265 | 1.339 |
| rs422186   | 84489971      | G        | A        | 0.06311  | 0.06764  | 0.2594 | 0.9241 | 0.8057 | 1.06  |
| rs8051462  | 84504828      | A        | G        | 0.4726   | 0.4607   | 0.2663 | 1.039  | 0.9712 | 1.112 |
| rs1472235  | 84518468      | G        | A        | 0.2758   | 0.2822   | 0.2813 | 0.9593 | 0.8895 | 1.035 |
| rs768410   | 84503229      | T        | G        | 0.4526   | 0.4414   | 0.2819 | 1.038  | 0.9699 | 1.111 |
| rs1519976  | 84503176      | T        | G        | 0.4526   | 0.4414   | 0.2834 | 1.038  | 0.9698 | 1.11  |
| rs428578   | 84475445      | A        | G        | 0.3722   | 0.3619   | 0.2937 | 1.038  | 0.9678 | 1.114 |
| rs147968   | 84503340      | T        | C        | 0.4533   | 0.4422   | 0.2972 | 1.037  | 0.9688 | 1.109 |
| rs395498   | 84484222      | A        | G        | 0.3798   | 0.3685   | 0.2995 | 1.038  | 0.9676 | 1.113 |
| rs305069   | 84507059      | T        | C        | 0.4833   | 0.47     | 0.3067 | 1.036  | 0.968  | 1.109 |
| rs16940103 | 84535710      | G        | T        | 0.1035   | 0.1085   | 0.3177 | 0.9455 | 0.847  | 1.055 |
| rs6540231  | 84473561      | C        | G        | 0.4857   | 0.4767   | 0.323  | 1.035  | 0.9671 | 1.107 |
| rs447377   | 84476336      | T        | G        | 0.3751   | 0.365    | 0.3248 | 1.036  | 0.9657 | 1.111 |
| rs57670691 | 84542583      | G        | A        | 0.02432  | 0.02682  | 0.3265 | 0.8978 | 0.7239 | 1.113 |
| rs58189590 | 84543560      | G        | A        | 0.02368  | 0.02626  | 0.328  | 0.897  | 0.7215 | 1.115 |
| rs57426547 | 84543596      | C        | T        | 0.02368  | 0.02626  | 0.328  | 0.897  | 0.7215 | 1.115 |
| rs182511   | 84495157      | C        | G        | 0.0211   | 0.01619  | 0.3281 | 1.134  | 0.8815 | 1.458 |
| rs8057456  | 84510697      | C        | T        | 0.4018   | 0.3889   | 0.3347 | 1.035  | 0.9648 | 1.111 |
| rs8047999  | 84505028      | G        | C        | 0.4708   | 0.4601   | 0.336  | 1.034  | 0.9662 | 1.106 |
| rs424971   | 84503951      | T        | C        | 0.4534   | 0.4433   | 0.3474 | 1.033  | 0.9652 | 1.106 |
| rs391855   | 84486122      | A        | T        | 0.4421   | 0.4301   | 0.3532 | 1.033  | 0.9646 | 1.106 |
| rs398114   | 84486785      | A        | C        | 0.448    | 0.4362   | 0.359  | 1.033  | 0.9639 | 1.107 |
| rs9924391  | 84487331      | G        | T        | 0.06471  | 0.06913  | 0.3604 | 0.9387 | 0.8197 | 1.075 |
| rs58073431 | 84543416      | G        | C        | 0.02366  | 0.02609  | 0.3605 | 0.9032 | 0.7262 | 1.123 |
| rs59821663 | 84543420      | A        | A        | 0.02366  | 0.02609  | 0.3605 | 0.9032 | 0.7262 | 1.123 |
| rs73268906 | 84544188      | A        | G        | 0.02368  | 0.0261   | 0.3611 | 0.9034 | 0.7263 | 1.124 |
| rs370703   | 84477981      | C        | T        | 0.3765   | 0.3666   | 0.3646 | 1.033  | 0.9632 | 1.108 |
| rs12596295 | 84532576      | G        | A        | 0.08159  | 0.08545  | 0.3788 | 0.9464 | 0.8372 | 1.07  |
| rs388405   | 84487398      | G        | A        | 0.06771  | 0.0718   | 0.3826 | 0.9425 | 0.825  | 1.077 |
| rs438968   | 84477729      | T        | C        | 0.3783   | 0.3688   | 0.386  | 1.031  | 0.9618 | 1.106 |
| rs903202   | 84505280      | T        | C        | 0.4854   | 0.4748   | 0.3912 | 1.03   | 0.9626 | 1.102 |
| rs73268908 | 84544290      | C        | A        | 0.02364  | 0.02594  | 0.392  | 0.909  | 0.7306 | 1.131 |
| rs416515   | 84488175      | G        | C        | 0.06441  | 0.06839  | 0.3941 | 0.9424 | 0.8223 | 1.08  |
| rs398229   | 84488191      | G        | A        | 0.06441  | 0.06839  | 0.3941 | 0.9424 | 0.8223 | 1.08  |
| rs305080   | 84499275      | C        | T        | 0.3562   | 0.3459   | 0.3953 | 1.032  | 0.9602 | 1.108 |
| rs72807020 | 84535618      | C        | G        | 0.1041   | 0.1086   | 0.399  | 0.9538 | 0.8546 | 1.065 |
| 84546359   | 84546359      | G        | A        | 0.02379  | 0.02594  | 0.4004 | 0.9107 | 0.7323 | 1.133 |
| rs11649318 | 84503982      | G        | C        | 0.3957   | 0.3859   | 0.4043 | 1.03   | 0.9609 | 1.104 |
| rs433322   | 84482073      | A        | G        | 0.3796   | 0.3699   | 0.406  | 1.03   | 0.9606 | 1.105 |
| rs454128   | 84485236      | C        | G        | 0.2769   | 0.2658   | 0.4132 | 1.033  | 0.9557 | 1.117 |
| rs434216   | 84484514      | T        | C        | 0.3849   | 0.3747   | 0.4144 | 1.03   | 0.9597 | 1.105 |
| rs9932449  | 84487333      | C        | A        | 0.06705  | 0.071    | 0.4147 | 0.9459 | 0.8276 | 1.081 |
| rs57278440 | 84544999      | G        | C        | 0.02375  | 0.02593  | 0.4157 | 0.9134 | 0.7343 | 1.136 |

| SNP        | Position (bp) | A2_major | A1_minor | MAF_case | MAF_ctrl | P      | OR     | L95    | U95   |
|------------|---------------|----------|----------|----------|----------|--------|--------|--------|-------|
| rs12596341 | 84524541      | C        | A        | 0.1055   | 0.1096   | 0.4167 | 0.9557 | 0.8568 | 1.066 |
| rs59120392 | 84544797      | C        | T        | 0.02375  | 0.02593  | 0.4169 | 0.9136 | 0.7345 | 1.136 |
| rs12149363 | 84486206      | C        | G        | 0.06313  | 0.06733  | 0.4188 | 0.9448 | 0.8235 | 1.084 |
| 84492016   | 84492016      | A        | C        | 0.05804  | 0.06149  | 0.4217 | 0.9427 | 0.8162 | 1.089 |
| rs57396687 | 84542701      | G        | A        | 0.02391  | 0.0261   | 0.4306 | 0.9162 | 0.737  | 1.139 |
| rs426900   | 84474799      | T        | C        | 0.0597   | 0.06392  | 0.4337 | 0.9428 | 0.8135 | 1.093 |
| rs908983   | 84552021      | T        | C        | 0.3153   | 0.3095   | 0.4376 | 1.029  | 0.9567 | 1.108 |
| rs73268912 | 84544401      | C        | A        | 0.02391  | 0.02596  | 0.4392 | 0.9176 | 0.7379 | 1.141 |
| rs305088   | 84539102      | C        | T        | 0.3453   | 0.3404   | 0.4407 | 1.029  | 0.9575 | 1.105 |
| rs12922615 | 84484196      | C        | T        | 0.06277  | 0.06633  | 0.4419 | 0.9473 | 0.8253 | 1.087 |
| rs421710   | 84481015      | G        | C        | 0.3795   | 0.3702   | 0.4433 | 1.028  | 0.9584 | 1.102 |
| rs305073   | 84515294      | C        | T        | 0.4165   | 0.4052   | 0.4454 | 1.028  | 0.9583 | 1.102 |
| rs305074   | 84515321      | T        | C        | 0.4147   | 0.4034   | 0.4474 | 1.027  | 0.9584 | 1.101 |
| 84538025   | 84538025      | C        | G        | 0.03716  | 0.03301  | 0.4596 | 1.072  | 0.8921 | 1.287 |
| rs403605   | 84485129      | G        | A        | 0.08845  | 0.09241  | 0.4599 | 0.9569 | 0.8513 | 1.076 |
| rs391821   | 84479528      | G        | T        | 0.03772  | 0.03625  | 0.4637 | 1.072  | 0.8907 | 1.289 |
| rs73268923 | 84546268      | C        | T        | 0.02374  | 0.02566  | 0.4686 | 0.9223 | 0.7411 | 1.148 |
| rs369597   | 84486935      | T        | C        | 0.06761  | 0.0712   | 0.4716 | 0.9521 | 0.8329 | 1.088 |
| 84524043   | 84524043      | G        | A        | 0.02197  | 0.01965  | 0.4806 | 1.091  | 0.8565 | 1.39  |
| rs369173   | 84486783      | T        | G        | 0.4557   | 0.4451   | 0.4833 | 1.025  | 0.9573 | 1.097 |
| rs375288   | 84485372      | G        | A        | 0.3529   | 0.3428   | 0.4848 | 1.026  | 0.9548 | 1.102 |
| rs11117418 | 84524028      | T        | G        | 0.1428   | 0.1457   | 0.4999 | 0.9675 | 0.8789 | 1.065 |
| rs305090   | 84536847      | C        | T        | 0.3906   | 0.3878   | 0.5007 | 1.024  | 0.9554 | 1.098 |
| rs7185022  | 84510430      | C        | A        | 0.4803   | 0.49     | 0.507  | 0.9772 | 0.9129 | 1.046 |
| rs447919   | 84526058      | C        | T        | 0.3903   | 0.3866   | 0.509  | 1.024  | 0.9552 | 1.097 |
| rs386098   | 84486701      | G        | A        | 0.06847  | 0.07177  | 0.51   | 0.9558 | 0.8355 | 1.093 |
| rs55739703 | 84541492      | C        | G        | 0.02243  | 0.024    | 0.5223 | 0.9291 | 0.7416 | 1.164 |
| rs6540236  | 84548591      | G        | A        | 0.2891   | 0.2844   | 0.5261 | 1.025  | 0.9502 | 1.105 |
| rs371391   | 84487395      | T        | C        | 0.06749  | 0.07051  | 0.5265 | 0.9576 | 0.8374 | 1.095 |
| rs11864884 | 84458540      | C        | T        | 0.2834   | 0.2804   | 0.5359 | 1.024  | 0.9502 | 1.103 |
| rs8057009  | 84548424      | T        | G        | 0.2527   | 0.2491   | 0.5364 | 1.025  | 0.948  | 1.108 |
| rs305092   | 84536618      | G        | A        | 0.3834   | 0.3817   | 0.5385 | 1.022  | 0.9532 | 1.096 |
| rs6540238  | 84549328      | G        | A        | 0.2913   | 0.2866   | 0.5394 | 1.024  | 0.9495 | 1.104 |
| rs9925859  | 84525223      | G        | C        | 0.3904   | 0.3867   | 0.5537 | 1.021  | 0.953  | 1.094 |
| rs4843873  | 84547276      | G        | A        | 0.2947   | 0.2896   | 0.5539 | 1.023  | 0.9491 | 1.102 |
| rs305064   | 84531643      | C        | T        | 0.3619   | 0.3609   | 0.5568 | 1.021  | 0.952  | 1.096 |
| rs73268928 | 84547653      | C        | G        | 0.02316  | 0.02443  | 0.5663 | 0.937  | 0.75   | 1.17  |
| rs2017161  | 84470594      | A        | C        | 0.2891   | 0.2953   | 0.5676 | 0.9786 | 0.9085 | 1.054 |
| 84504605   | 84504605      | A        | C        | 0.09743  | 0.1001   | 0.5925 | 0.9689 | 0.8631 | 1.088 |
| rs2361764  | 84550459      | C        | G        | 0.3036   | 0.299    | 0.5926 | 1.021  | 0.9472 | 1.1   |
| rs439390   | 84476707      | A        | G        | 0.37     | 0.3637   | 0.5968 | 1.019  | 0.9493 | 1.095 |
| rs305094   | 84535606      | T        | C        | 0.3475   | 0.3477   | 0.6147 | 1.018  | 0.9486 | 1.093 |
| rs4240807  | 84542862      | C        | A        | 0.2805   | 0.275    | 0.6175 | 1.02   | 0.945  | 1.1   |
| rs8062669  | 84530493      | C        | T        | 0.04224  | 0.03877  | 0.6177 | 1.045  | 0.8802 | 1.24  |
| rs305091   | 84536744      | G        | A        | 0.388    | 0.387    | 0.6211 | 1.018  | 0.9495 | 1.091 |
| rs305093   | 84536086      | C        | T        | 0.3467   | 0.3471   | 0.6224 | 1.018  | 0.9482 | 1.093 |
| rs4843876  | 84550233      | A        | T        | 0.3022   | 0.2986   | 0.6267 | 1.019  | 0.9458 | 1.097 |
| rs11117412 | 84484343      | C        | A        | 0.2625   | 0.2545   | 0.6319 | 1.019  | 0.9421 | 1.103 |
| rs2885364  | 84550691      | T        | A        | 0.3028   | 0.2995   | 0.639  | 1.018  | 0.9449 | 1.097 |
| rs305067   | 84529341      | G        | C        | 0.3578   | 0.3581   | 0.64   | 1.018  | 0.9449 | 1.097 |
| 84553110   | 84553110      | G        | C        | 0.02192  | 0.02263  | 0.6432 | 0.9472 | 0.7532 | 1.191 |
| rs305061   | 84533160      | T        | C        | 0.3504   | 0.3506   | 0.6554 | 1.016  | 0.9468 | 1.091 |
| rs1915034  | 84542858      | G        | A        | 0.2814   | 0.2761   | 0.6559 | 1.017  | 0.9431 | 1.098 |
| rs13338943 | 84510452      | G        | T        | 0.1155   | 0.1189   | 0.6613 | 0.977  | 0.8805 | 1.084 |
| rs965773   | 84537847      | C        | A        | 0.4731   | 0.4738   | 0.665  | 0.9852 | 0.9207 | 1.054 |
| rs2049086  | 84552380      | G        | T        | 0.3056   | 0.3027   | 0.6684 | 1.017  | 0.9431 | 1.096 |
| rs925992   | 84548081      | C        | T        | 0.294    | 0.2898   | 0.6693 | 1.017  | 0.9422 | 1.097 |
| rs4843855  | 84460047      | C        | T        | 0.3032   | 0.294    | 0.6704 | 1.017  | 0.9421 | 1.097 |
| rs305065   | 84531367      | C        | G        | 0.3622   | 0.3623   | 0.6806 | 1.015  | 0.9462 | 1.088 |
| rs908982   | 84552384      | C        | A        | 0.3072   | 0.3043   | 0.6811 | 1.016  | 0.9427 | 1.094 |
| rs731707   | 84538469      | T        | C        | 0.4757   | 0.4772   | 0.683  | 0.986  | 0.9216 | 1.055 |
| rs11645398 | 84553796      | A        | G        | 0.3129   | 0.3091   | 0.6947 | 1.015  | 0.9427 | 1.093 |
| rs7200396  | 84469798      | T        | C        | 0.2926   | 0.2968   | 0.7056 | 0.9859 | 0.9156 | 1.061 |
| rs9936199  | 84470118      | A        | G        | 0.2927   | 0.2968   | 0.7079 | 0.986  | 0.9157 | 1.062 |
| rs305089   | 84538531      | C        | T        | 0.3447   | 0.3467   | 0.7166 | 1.013  | 0.9436 | 1.088 |

| SNP        | Position (bp) | A2_major | A1_minor | MAF_case | MAF_ctrl | P      | OR     | L95    | U95   |
|------------|---------------|----------|----------|----------|----------|--------|--------|--------|-------|
| rs4843874  | 84547399      | T        | C        | 0.2954   | 0.2918   | 0.7207 | 1.014  | 0.9408 | 1.092 |
| 84476544   | 84476544      | A        | C        | 0.06579  | 0.06798  | 0.7245 | 0.9759 | 0.852  | 1.118 |
| 84462539   | 84462539      | T        | C        | 0.0236   | 0.02524  | 0.728  | 0.9607 | 0.7664 | 1.204 |
| 84533939   | 84533939      | A        | C        | 0.0425   | 0.03961  | 0.7387 | 1.03   | 0.867  | 1.223 |
| rs8048151  | 84546099      | T        | C        | 0.2904   | 0.286    | 0.7387 | 1.013  | 0.9394 | 1.092 |
| rs9932159  | 84470103      | C        | T        | 0.2922   | 0.2962   | 0.7422 | 0.9876 | 0.9171 | 1.064 |
| rs448136   | 84478848      | A        | C        | 0.3779   | 0.3736   | 0.7578 | 1.011  | 0.9426 | 1.085 |
| rs16940100 | 84533460      | C        | T        | 0.04162  | 0.03924  | 0.7617 | 1.027  | 0.8652 | 1.219 |
| 84533672   | 84533672      | C        | T        | 0.04162  | 0.03924  | 0.7617 | 1.027  | 0.8652 | 1.219 |
| 84533804   | 84533804      | T        | C        | 0.04162  | 0.03925  | 0.7628 | 1.027  | 0.8651 | 1.219 |
| rs878454   | 84523673      | G        | A        | 0.2455   | 0.2425   | 0.7653 | 1.012  | 0.9356 | 1.095 |
| rs6540235  | 84546396      | C        | T        | 0.3186   | 0.3145   | 0.7691 | 1.011  | 0.9395 | 1.088 |
| rs572967   | 84484995      | A        | G        | 0.3492   | 0.3426   | 0.7706 | 1.011  | 0.9411 | 1.085 |
| rs11642456 | 84553581      | G        | T        | 0.3195   | 0.3172   | 0.777  | 1.011  | 0.9398 | 1.087 |
| 84498477   | 84498477      | T        | G        | 0.01833  | 0.01927  | 0.7832 | 0.9651 | 0.7494 | 1.243 |
| rs908981   | 84552926      | C        | T        | 0.3195   | 0.3172   | 0.7834 | 1.01   | 0.9395 | 1.086 |
| rs12446139 | 84553085      | A        | G        | 0.3195   | 0.3172   | 0.7834 | 1.01   | 0.9395 | 1.086 |
| rs12919427 | 84553160      | G        | A        | 0.3195   | 0.3172   | 0.7834 | 1.01   | 0.9395 | 1.086 |
| rs12930405 | 84553163      | G        | C        | 0.3195   | 0.3172   | 0.7834 | 1.01   | 0.9395 | 1.086 |
| rs908984   | 84542530      | A        | T        | 0.3066   | 0.3022   | 0.7841 | 1.01   | 0.9384 | 1.088 |
| rs1915033  | 84542932      | G        | A        | 0.3065   | 0.3024   | 0.7847 | 1.01   | 0.9383 | 1.088 |
| rs11861479 | 84523794      | T        | G        | 0.1257   | 0.1258   | 0.7869 | 0.986  | 0.8901 | 1.092 |
| rs908986   | 84542429      | C        | G        | 0.3056   | 0.3016   | 0.7886 | 1.01   | 0.9382 | 1.088 |
| rs8054065  | 84508855      | G        | A        | 0.4987   | 0.4994   | 0.7895 | 1.009  | 0.943  | 1.08  |
| rs903201   | 84523785      | T        | C        | 0.1258   | 0.1258   | 0.7947 | 0.9865 | 0.8906 | 1.093 |
| rs10863202 | 84545499      | G        | A        | 0.3177   | 0.3143   | 0.7982 | 1.01   | 0.938  | 1.087 |
| rs17444416 | 84505599      | G        | A        | 0.05992  | 0.05924  | 0.8002 | 1.019  | 0.8826 | 1.176 |
| rs9929675  | 84464599      | G        | A        | 0.2883   | 0.2917   | 0.8127 | 0.991  | 0.9199 | 1.068 |
| rs9929701  | 84464675      | G        | C        | 0.2884   | 0.2917   | 0.8174 | 0.9913 | 0.9201 | 1.068 |
| rs9930043  | 84465079      | G        | C        | 0.2884   | 0.2912   | 0.8235 | 0.9916 | 0.9204 | 1.068 |
| rs908985   | 84542503      | C        | T        | 0.3059   | 0.3021   | 0.827  | 1.008  | 0.9365 | 1.086 |
| rs1879213  | 84530977      | C        | T        | 0.09826  | 0.09787  | 0.8327 | 0.9878 | 0.8817 | 1.107 |
| rs1044873  | 84513172      | G        | A        | 0.3889   | 0.384    | 0.8352 | 1.008  | 0.939  | 1.081 |
| rs4843321  | 84511577      | T        | C        | 0.3858   | 0.3807   | 0.8364 | 1.007  | 0.9389 | 1.081 |
| rs11117417 | 84523830      | A        | T        | 0.1257   | 0.1255   | 0.8433 | 0.9897 | 0.8934 | 1.096 |
| rs9937847  | 84475052      | T        | C        | 0.07238  | 0.0744   | 0.8442 | 0.987  | 0.8667 | 1.124 |
| rs16940099 | 84533441      | T        | C        | 0.04044  | 0.03844  | 0.8448 | 1.017  | 0.8554 | 1.21  |
| rs4843872  | 84543172      | G        | A        | 0.3063   | 0.3029   | 0.8461 | 1.007  | 0.9357 | 1.085 |
| rs11649461 | 84553758      | T        | C        | 0.3363   | 0.3334   | 0.8465 | 1.007  | 0.9364 | 1.083 |
| rs9924234  | 84465076      | T        | C        | 0.2886   | 0.2915   | 0.849  | 0.9928 | 0.9216 | 1.07  |
| rs7186247  | 84546570      | G        | T        | 0.3179   | 0.3147   | 0.8505 | 1.007  | 0.9358 | 1.084 |
| rs12596291 | 84532538      | G        | C        | 0.09795  | 0.0974   | 0.8506 | 0.9891 | 0.8826 | 1.108 |
| rs9932359  | 84465411      | G        | A        | 0.2886   | 0.2915   | 0.8525 | 0.993  | 0.9217 | 1.07  |
| rs3751712  | 84511456      | T        | C        | 0.4038   | 0.4026   | 0.8527 | 0.9932 | 0.9238 | 1.068 |
| rs305072   | 84513164      | A        | G        | 0.02012  | 0.01779  | 0.8541 | 1.023  | 0.7997 | 1.31  |
| rs59403904 | 84543458      | C        | T        | 0.01783  | 0.01769  | 0.8544 | 1.025  | 0.7897 | 1.33  |
| 84513230   | 84513230      | C        | A        | 0.4888   | 0.4949   | 0.8663 | 0.9941 | 0.9274 | 1.066 |
| rs16940088 | 84531870      | C        | T        | 0.09818  | 0.09763  | 0.8685 | 0.9904 | 0.8839 | 1.11  |
| rs13336885 | 84469034      | T        | C        | 0.2913   | 0.294    | 0.8727 | 0.9939 | 0.9223 | 1.071 |
| rs56834409 | 84532277      | A        | G        | 0.09816  | 0.09749  | 0.8785 | 0.9912 | 0.8845 | 1.111 |
| rs16940101 | 84535626      | A        | G        | 0.04295  | 0.04113  | 0.8815 | 1.013  | 0.856  | 1.198 |
| rs8050476  | 84530705      | A        | G        | 0.04358  | 0.04155  | 0.8827 | 1.013  | 0.8566 | 1.197 |
| rs17444745 | 84519063      | G        | A        | 0.1673   | 0.1694   | 0.893  | 0.9939 | 0.9086 | 1.087 |
| rs8044852  | 84552728      | G        | A        | 0.3209   | 0.3194   | 0.8935 | 1.005  | 0.9343 | 1.081 |
| rs1568391  | 84512805      | T        | G        | 0.4735   | 0.4791   | 0.9043 | 0.9958 | 0.9291 | 1.067 |
| 84529220   | 84529220      | C        | T        | 0.01522  | 0.01471  | 0.914  | 1.016  | 0.7635 | 1.352 |
| rs4843871  | 84543036      | A        | G        | 0.3149   | 0.3124   | 0.915  | 1.004  | 0.933  | 1.08  |
| rs11639990 | 84536305      | C        | G        | 0.128    | 0.1266   | 0.916  | 1.005  | 0.9086 | 1.113 |
| rs305075   | 84517136      | G        | T        | 0.4716   | 0.4768   | 0.9178 | 0.9964 | 0.9307 | 1.067 |
| rs16940104 | 84535711      | G        | T        | 0.04127  | 0.03964  | 0.9204 | 1.009  | 0.85   | 1.197 |
| rs878453   | 84523664      | T        | C        | 0.3784   | 0.3766   | 0.9243 | 1.003  | 0.9355 | 1.076 |
| rs7190319  | 84536046      | A        | G        | 0.1277   | 0.1262   | 0.9253 | 1.005  | 0.9079 | 1.112 |
| rs10863201 | 84543272      | T        | C        | 0.3216   | 0.3191   | 0.9271 | 1.003  | 0.9318 | 1.081 |
| rs908988   | 84542101      | A        | G        | 0.3234   | 0.3221   | 0.9304 | 0.9968 | 0.9266 | 1.072 |
| 84530967   | 84530967      | C        | T        | 0.02664  | 0.02759  | 0.9305 | 0.9908 | 0.804  | 1.221 |

| SNP        | Position (bp) | A2_major | A1_minor | MAF_case | MAF_ctrl | P      | OR     | L95    | U95   |
|------------|---------------|----------|----------|----------|----------|--------|--------|--------|-------|
| rs875529   | 84524187      | G        | C        | 0.1277   | 0.127    | 0.9307 | 0.9955 | 0.8995 | 1.102 |
| rs6540232  | 84478303      | T        | C        | 0.3338   | 0.3297   | 0.9326 | 1.003  | 0.933  | 1.079 |
| rs7185692  | 84527553      | C        | G        | 0.1263   | 0.1255   | 0.9353 | 0.9958 | 0.8993 | 1.103 |
| rs9308363  | 84481566      | T        | C        | 0.3379   | 0.3345   | 0.9453 | 0.9975 | 0.9286 | 1.072 |
| 84510896   | 84510896      | G        | A        | 0.01774  | 0.01825  | 0.957  | 1.007  | 0.7767 | 1.306 |
| rs12596376 | 84477898      | A        | C        | 0.2675   | 0.2626   | 0.9578 | 1.002  | 0.9274 | 1.083 |
| rs6540234  | 84540557      | C        | T        | 0.3039   | 0.3039   | 0.9695 | 0.9986 | 0.9275 | 1.075 |
| rs7193803  | 84483174      | T        | G        | 0.338    | 0.3344   | 0.97   | 0.9986 | 0.9295 | 1.073 |
| rs12598785 | 84521809      | A        | G        | 0.1328   | 0.1335   | 0.9776 | 1.001  | 0.9061 | 1.107 |
| rs11860517 | 84524000      | A        | G        | 0.1284   | 0.1275   | 0.9794 | 0.9987 | 0.9024 | 1.105 |
| rs7199472  | 84546685      | T        | G        | 0.3179   | 0.316    | 0.982  | 1.001  | 0.9302 | 1.077 |
| rs6638     | 84513545      | T        | A        | 0.4889   | 0.494    | 0.9925 | 0.9997 | 0.9326 | 1.072 |
| rs7186094  | 84535988      | G        | T        | 0.127    | 0.1261   | 0.9943 | 1      | 0.9039 | 1.107 |
| rs10400953 | 84526344      | C        | T        | 0.127    | 0.1258   | 0.9969 | 1      | 0.9034 | 1.107 |
| rs9936406  | 84476343      | C        | T        | 0.3316   | 0.328    | 0.997  | 1      | 0.9305 | 1.075 |
| 84482479   | 84482479      | A        | C        | 0.3381   | 0.3345   | 0.9983 | 0.9999 | 0.9307 | 1.074 |

Table S4: IRF8—Imputed Data for African Americans

| SNP      | Position (bp) | A2_major | A1_minor | MAF_case | MAF_ctrl | P        | OR     | L95    | U95    |
|----------|---------------|----------|----------|----------|----------|----------|--------|--------|--------|
| 84489106 | 84489106      | A        | T        | 0.02376  | 0.01835  | 0.1516   | 1.308  | 0.9063 | 1.887  |
| 84491140 | 84491140      | A        | T        | 0.02387  | 0.02115  | 0.273    | 1.211  | 0.86   | 1.705  |
| 84492643 | 84492643      | T        | G        | 0.01186  | 0.01719  | 0.04563  | 0.6358 | 0.4078 | 0.9912 |
| 84492921 | 84492921      | T        | G        | 0.0112   | 0.01697  | 0.02834  | 0.6143 | 0.3974 | 0.9496 |
| 84494602 | 84494602      | C        | T        | 0.03973  | 0.03598  | 0.4987   | 1.1    | 0.8349 | 1.449  |
| 84496333 | 84496333      | C        | T        | 0.07199  | 0.0772   | 0.5764   | 0.946  | 0.7786 | 1.149  |
| 84497036 | 84497036      | A        | C        | 0.02536  | 0.0214   | 0.1964   | 1.247  | 0.8921 | 1.743  |
| 84497964 | 84497964      | C        | T        | 0.01492  | 0.008114 | 0.01952  | 1.8    | 1.099  | 2.949  |
| 84498106 | 84498106      | A        | C        | 0.04145  | 0.03628  | 0.3056   | 1.156  | 0.8759 | 1.526  |
| 84499982 | 84499982      | G        | A        | 0.01693  | 0.008718 | 0.007347 | 1.908  | 1.19   | 3.061  |
| 84500960 | 84500960      | T        | G        | 0.0146   | 0.01607  | 0.5292   | 0.8728 | 0.5714 | 1.333  |
| 84503190 | 84503190      | C        | G        | 0.03179  | 0.03563  | 0.6407   | 0.9342 | 0.7021 | 1.243  |
| 84504395 | 84504395      | G        | A        | 0.03232  | 0.03513  | 0.7711   | 0.9582 | 0.7188 | 1.277  |
| 84504557 | 84504557      | C        | T        | 0.03138  | 0.03486  | 0.6754   | 0.9398 | 0.703  | 1.257  |
| 84504944 | 84504944      | A        | C        | 0.03378  | 0.02745  | 0.13     | 1.27   | 0.932  | 1.731  |
| 84505029 | 84505029      | G        | A        | 0.03197  | 0.03488  | 0.8021   | 0.9637 | 0.7218 | 1.287  |
| 84505413 | 84505413      | G        | A        | 0.03347  | 0.02994  | 0.3068   | 1.163  | 0.8709 | 1.552  |
| 84505809 | 84505809      | C        | T        | 0.01474  | 0.01834  | 0.1756   | 0.7546 | 0.5022 | 1.134  |
| 84505873 | 84505873      | C        | T        | 0.02907  | 0.03301  | 0.5581   | 0.9141 | 0.6768 | 1.235  |
| 84505978 | 84505978      | A        | C        | 0.135    | 0.1384   | 0.845    | 1.015  | 0.8719 | 1.182  |
| 84505981 | 84505981      | T        | A        | 0.135    | 0.1386   | 0.8523   | 1.015  | 0.8713 | 1.181  |
| 84507124 | 84507124      | A        | C        | 0.01722  | 0.009565 | 0.01459  | 1.787  | 1.122  | 2.848  |
| 84508158 | 84508158      | T        | A        | 0.02704  | 0.0248   | 0.3071   | 1.183  | 0.857  | 1.632  |
| 84509238 | 84509238      | C        | T        | 0.01854  | 0.01028  | 0.005359 | 1.879  | 1.205  | 2.93   |
| 84510613 | 84510613      | G        | T        | 0.1109   | 0.1138   | 0.5313   | 0.9483 | 0.8031 | 1.12   |
| 84511805 | 84511805      | C        | T        | 0.08487  | 0.08515  | 0.5975   | 1.051  | 0.8737 | 1.264  |
| 84511839 | 84511839      | A        | C        | 0.04969  | 0.05347  | 0.5002   | 0.9219 | 0.7278 | 1.168  |
| 84512383 | 84512383      | C        | T        | 0.04662  | 0.03659  | 0.0962   | 1.241  | 0.9622 | 1.601  |
| 84513118 | 84513118      | A        | C        | 0.02111  | 0.02314  | 0.793    | 0.9526 | 0.6629 | 1.369  |
| 84513759 | 84513759      | A        | C        | 0.02209  | 0.02375  | 0.8566   | 0.9675 | 0.6764 | 1.384  |
| 84514732 | 84514732      | A        | C        | 0.02101  | 0.02295  | 0.7814   | 0.9503 | 0.6632 | 1.362  |
| 84515002 | 84515002      | C        | T        | 0.06564  | 0.05994  | 0.2166   | 1.142  | 0.9252 | 1.409  |
| 84515682 | 84515682      | A        | G        | 0.0382   | 0.03129  | 0.2042   | 1.198  | 0.9063 | 1.584  |
| 84515779 | 84515779      | A        | C        | 0.0225   | 0.02232  | 0.7888   | 1.05   | 0.7342 | 1.502  |
| 84515848 | 84515848      | A        | C        | 0.02101  | 0.02295  | 0.779    | 0.9498 | 0.6628 | 1.361  |
| 84515863 | 84515863      | A        | C        | 0.02139  | 0.02297  | 0.8462   | 0.9652 | 0.6746 | 1.381  |
| 84515870 | 84515870      | A        | C        | 0.02104  | 0.02301  | 0.7817   | 0.9504 | 0.6631 | 1.362  |
| 84516377 | 84516377      | A        | C        | 0.02172  | 0.02281  | 0.9701   | 1.007  | 0.7027 | 1.443  |
| 84517309 | 84517309      | A        | C        | 0.008054 | 0.01266  | 0.01694  | 0.5378 | 0.3233 | 0.8948 |
| 84518037 | 84518037      | A        | C        | 0.01735  | 0.00981  | 0.01437  | 1.81   | 1.126  | 2.911  |
| 84519589 | 84519589      | G        | A        | 0.0137   | 0.007295 | 0.0172   | 1.935  | 1.124  | 3.33   |
| 84520866 | 84520866      | G        | A        | 0.0102   | 0.01343  | 0.1295   | 0.6876 | 0.4236 | 1.116  |
| 84521073 | 84521073      | G        | A        | 0.02835  | 0.03107  | 0.4035   | 0.879  | 0.6496 | 1.19   |
| 84522279 | 84522279      | G        | A        | 0.03976  | 0.03244  | 0.2169   | 1.189  | 0.9035 | 1.564  |
| 84523106 | 84523106      | A        | C        | 0.02092  | 0.01812  | 0.7174   | 1.069  | 0.7435 | 1.538  |
| 84523433 | 84523433      | A        | C        | 0.1664   | 0.1595   | 0.4485   | 1.055  | 0.9187 | 1.211  |
| 84523564 | 84523564      | G        | A        | 0.03774  | 0.03533  | 0.9366   | 1.011  | 0.7729 | 1.322  |
| 84524648 | 84524648      | G        | A        | 0.03197  | 0.02781  | 0.4639   | 1.118  | 0.8299 | 1.505  |
| 84524665 | 84524665      | C        | A        | 0.3823   | 0.4128   | 0.005096 | 0.8623 | 0.7774 | 0.9565 |
| 84524668 | 84524668      | C        | A        | 0.3795   | 0.4098   | 0.006223 | 0.8645 | 0.7789 | 0.9596 |
| 84524720 | 84524720      | C        | A        | 0.0889   | 0.1097   | 0.001085 | 0.7537 | 0.6361 | 0.893  |
| 84525116 | 84525116      | C        | T        | 0.009929 | 0.01081  | 0.5265   | 0.8465 | 0.5054 | 1.418  |
| 84525893 | 84525893      | G        | A        | 0.03259  | 0.03224  | 0.9921   | 0.9986 | 0.7512 | 1.327  |
| 84527141 | 84527141      | A        | C        | 0.1251   | 0.1296   | 0.5725   | 0.9572 | 0.8224 | 1.114  |
| 84528054 | 84528054      | T        | C        | 0.03163  | 0.03286  | 0.6542   | 0.9353 | 0.698  | 1.253  |
| 84528467 | 84528467      | C        | G        | 0.02133  | 0.01883  | 0.8174   | 1.043  | 0.7301 | 1.49   |
| 84529195 | 84529195      | C        | T        | 0.02131  | 0.01858  | 0.7545   | 1.059  | 0.7402 | 1.514  |
| 84530056 | 84530056      | G        | T        | 0.02102  | 0.01834  | 0.7497   | 1.06   | 0.7394 | 1.521  |
| 84531120 | 84531120      | C        | A        | 0.01385  | 0.01729  | 0.295    | 0.805  | 0.5365 | 1.208  |
| 84531157 | 84531157      | C        | T        | 0.03666  | 0.03532  | 0.922    | 0.9867 | 0.7547 | 1.29   |

| SNP        | Position (bp) | A2_major | A1_minor | MAF_case | MAF_ctrl | P       | OR     | L95    | U95   |
|------------|---------------|----------|----------|----------|----------|---------|--------|--------|-------|
| 84532153   | 84532153      | G        | A        | 0.0363   | 0.03532  | 0.8585  | 0.9759 | 0.7461 | 1.276 |
| 84532251   | 84532251      | C        | A        | 0.05191  | 0.06114  | 0.2422  | 0.8746 | 0.6987 | 1.095 |
| 84532751   | 84532751      | C        | A        | 0.05191  | 0.06111  | 0.2443  | 0.8751 | 0.6991 | 1.095 |
| 84532869   | 84532869      | C        | T        | 0.03441  | 0.03422  | 0.7791  | 0.9615 | 0.731  | 1.265 |
| 84533672   | 84533672      | C        | T        | 0.01283  | 0.01505  | 0.3773  | 0.8263 | 0.5409 | 1.262 |
| 84533804   | 84533804      | T        | C        | 0.01283  | 0.01505  | 0.3773  | 0.8263 | 0.5409 | 1.262 |
| 84534005   | 84534005      | G        | C        | 0.04136  | 0.03171  | 0.01947 | 1.396  | 1.055  | 1.847 |
| 84535351   | 84535351      | A        | T        | 0.04221  | 0.0367   | 0.3851  | 1.123  | 0.864  | 1.461 |
| 84535387   | 84535387      | C        | T        | 0.04221  | 0.0367   | 0.3851  | 1.123  | 0.864  | 1.461 |
| 84535501   | 84535501      | C        | T        | 0.03663  | 0.03547  | 0.7184  | 1.052  | 0.7984 | 1.386 |
| 84536862   | 84536862      | G        | A        | 0.04134  | 0.04599  | 0.329   | 0.8834 | 0.6888 | 1.133 |
| 84537377   | 84537377      | G        | A        | 0.04521  | 0.04157  | 0.742   | 1.043  | 0.8103 | 1.344 |
| 84537750   | 84537750      | C        | A        | 0.03717  | 0.03587  | 0.6271  | 1.07   | 0.8136 | 1.408 |
| 84541385   | 84541385      | C        | A        | 0.05253  | 0.0532   | 0.4831  | 1.086  | 0.8627 | 1.367 |
| 84542243   | 84542243      | C        | T        | 0.01951  | 0.01893  | 0.8213  | 1.045  | 0.7156 | 1.525 |
| 84542469   | 84542469      | C        | A        | 0.02741  | 0.0244   | 0.3337  | 1.173  | 0.8485 | 1.622 |
| 84542720   | 84542720      | A        | C        | 0.06008  | 0.06156  | 0.5566  | 1.066  | 0.8611 | 1.32  |
| 84542848   | 84542848      | T        | C        | 0.02419  | 0.02372  | 0.7814  | 1.049  | 0.75   | 1.466 |
| 84543177   | 84543177      | C        | T        | 0.01883  | 0.01864  | 0.9516  | 0.9883 | 0.675  | 1.447 |
| 84543380   | 84543380      | C        | G        | 0.06154  | 0.06407  | 0.7756  | 1.031  | 0.8364 | 1.27  |
| 84544270   | 84544270      | C        | T        | 0.02679  | 0.02735  | 0.6297  | 0.9245 | 0.6719 | 1.272 |
| 84546359   | 84546359      | G        | A        | 0.08094  | 0.08105  | 0.9767  | 1.003  | 0.8365 | 1.202 |
| 84548901   | 84548901      | G        | T        | 0.05212  | 0.04299  | 0.1105  | 1.217  | 0.9562 | 1.549 |
| 84550849   | 84550849      | G        | T        | 0.01425  | 0.01648  | 0.4011  | 0.8302 | 0.5377 | 1.282 |
| 84554073   | 84554073      | C        | T        | 0.008523 | 0.01207  | 0.3118  | 0.7592 | 0.4452 | 1.295 |
| 84556512   | 84556512      | G        | A        | 0.0167   | 0.01868  | 0.7131  | 0.9275 | 0.6211 | 1.385 |
| rs1021479  | 84514915      | T        | C        | 0.1088   | 0.09679  | 0.06182 | 1.172  | 0.9922 | 1.384 |
| rs1021480  | 84516471      | A        | G        | 0.4477   | 0.4379   | 0.1174  | 1.086  | 0.9794 | 1.205 |
| rs1021481  | 84516521      | G        | A        | 0.4469   | 0.4401   | 0.1942  | 1.071  | 0.9659 | 1.187 |
| rs1044873  | 84513172      | G        | A        | 0.465    | 0.4549   | 0.4078  | 1.044  | 0.9425 | 1.157 |
| rs10514610 | 84499676      | G        | C        | 0.3107   | 0.3022   | 0.3602  | 1.053  | 0.9423 | 1.178 |
| rs10514611 | 84512743      | C        | T        | 0.2341   | 0.2438   | 0.9575  | 0.9967 | 0.8834 | 1.125 |
| rs10863203 | 84551081      | C        | T        | 0.09394  | 0.1041   | 0.1977  | 0.8955 | 0.7571 | 1.059 |
| rs11117415 | 84508187      | A        | G        | 0.2734   | 0.2703   | 0.8845  | 1.009  | 0.8993 | 1.131 |
| rs11117416 | 84515825      | C        | G        | 0.1701   | 0.1831   | 0.5294  | 0.9578 | 0.8372 | 1.096 |
| rs11117418 | 84524028      | T        | G        | 0.2172   | 0.2265   | 0.4182  | 0.9505 | 0.8405 | 1.075 |
| rs11117419 | 84529383      | C        | G        | 0.2904   | 0.3159   | 0.06195 | 0.8993 | 0.8045 | 1.005 |
| rs11117420 | 84529423      | G        | C        | 0.1925   | 0.1934   | 0.6891  | 0.9739 | 0.8553 | 1.109 |
| rs11117421 | 84529461      | G        | A        | 0.2905   | 0.3157   | 0.06713 | 0.9012 | 0.8063 | 1.007 |
| rs11117422 | 84529514      | G        | C        | 0.1251   | 0.1283   | 0.6799  | 0.9683 | 0.8309 | 1.128 |
| rs11117423 | 84529682      | T        | C        | 0.2908   | 0.316    | 0.0653  | 0.9006 | 0.8058 | 1.007 |
| rs11117424 | 84529738      | A        | G        | 0.2908   | 0.316    | 0.0653  | 0.9006 | 0.8058 | 1.007 |
| rs11117425 | 84529772      | C        | T        | 0.2908   | 0.3158   | 0.06452 | 0.9003 | 0.8055 | 1.006 |
| rs11117426 | 84547768      | T        | C        | 0.1193   | 0.1289   | 0.1074  | 0.8824 | 0.7578 | 1.028 |
| rs11639990 | 84536305      | G        | C        | 0.2238   | 0.2421   | 0.1805  | 0.9206 | 0.8157 | 1.039 |
| rs11641153 | 84530641      | A        | G        | 0.08837  | 0.09136  | 0.4849  | 0.938  | 0.7839 | 1.122 |
| rs11642286 | 84479110      | A        | G        | 0.01376  | 0.01242  | 0.5838  | 1.134  | 0.7236 | 1.776 |
| rs11642456 | 84553581      | G        | T        | 0.1353   | 0.1539   | 0.06264 | 0.8706 | 0.7523 | 1.007 |
| rs11642583 | 84496096      | T        | G        | 0.2248   | 0.2185   | 0.8127  | 1.015  | 0.9005 | 1.143 |
| rs11642873 | 84549206      | A        | C        | 0.05286  | 0.05086  | 0.8826  | 0.983  | 0.7828 | 1.234 |
| rs11643999 | 84530070      | G        | A        | 0.2927   | 0.3175   | 0.065   | 0.9007 | 0.8061 | 1.007 |
| rs11644034 | 84530113      | G        | A        | 0.1246   | 0.129    | 0.5134  | 0.9502 | 0.8153 | 1.107 |
| rs11644411 | 84517732      | G        | C        | 0.3143   | 0.3213   | 0.8639  | 0.9903 | 0.886  | 1.107 |
| rs11645398 | 84553796      | A        | G        | 0.1198   | 0.1369   | 0.07137 | 0.8651 | 0.739  | 1.013 |
| rs11646027 | 84513898      | T        | C        | 0.2439   | 0.2474   | 0.6315  | 1.03   | 0.9122 | 1.163 |
| rs11648012 | 84529908      | C        | T        | 0.2913   | 0.3163   | 0.06643 | 0.9009 | 0.8059 | 1.007 |
| rs11648084 | 84530099      | C        | T        | 0.2927   | 0.317    | 0.06469 | 0.9006 | 0.8059 | 1.006 |
| rs11648716 | 84464117      | A        | G        | 0.04882  | 0.05356  | 0.2391  | 0.872  | 0.6941 | 1.095 |
| rs11649271 | 84505830      | T        | C        | 0.08654  | 0.08951  | 0.6816  | 0.963  | 0.8045 | 1.153 |
| rs11649318 | 84503982      | C        | G        | 0.4567   | 0.4551   | 0.8991  | 1.007  | 0.9078 | 1.116 |

| SNP        | Position (bp) | A2_major | A1_minor | MAF_case | MAF_ctrl | P        | OR     | L95    | U95    |
|------------|---------------|----------|----------|----------|----------|----------|--------|--------|--------|
| rs11649549 | 84493298      | T        | C        | 0.2505   | 0.2499   | 0.5317   | 1.038  | 0.9227 | 1.169  |
| rs11859063 | 84552197      | A        | C        | 0.04623  | 0.05577  | 0.1227   | 0.8315 | 0.6578 | 1.051  |
| rs11860464 | 84482464      | A        | T        | 0.1633   | 0.1604   | 0.9767   | 1.002  | 0.8722 | 1.151  |
| rs11860480 | 84523959      | A        | C        | 0.3164   | 0.3304   | 0.2365   | 0.9362 | 0.8394 | 1.044  |
| rs11860517 | 84524000      | A        | G        | 0.2228   | 0.2316   | 0.3615   | 0.9445 | 0.8355 | 1.068  |
| rs11861479 | 84523794      | T        | G        | 0.2127   | 0.2246   | 0.2541   | 0.9292 | 0.819  | 1.054  |
| rs11861580 | 84456048      | C        | G        | 0.3109   | 0.3062   | 0.9037   | 1.007  | 0.9018 | 1.124  |
| rs11861594 | 84546240      | G        | A        | 0.01718  | 0.01975  | 0.673    | 0.9218 | 0.6315 | 1.345  |
| rs11862450 | 84494534      | G        | C        | 0.02816  | 0.02376  | 0.1703   | 1.25   | 0.9087 | 1.718  |
| rs11863590 | 84503995      | A        | G        | 0.3518   | 0.3541   | 0.8705   | 0.9909 | 0.8877 | 1.106  |
| rs11864884 | 84458540      | A        | G        | 0.4787   | 0.4809   | 0.6993   | 0.9801 | 0.8851 | 1.085  |
| rs11865366 | 84476840      | G        | A        | 0.01115  | 0.01273  | 0.5593   | 0.8716 | 0.5495 | 1.382  |
| rs11865854 | 84495152      | C        | T        | 0.08741  | 0.09403  | 0.7566   | 0.9719 | 0.8116 | 1.164  |
| rs11866609 | 84480582      | C        | G        | 0.2901   | 0.2684   | 0.0778   | 1.108  | 0.9887 | 1.241  |
| rs11866752 | 84510994      | G        | T        | 0.1777   | 0.1692   | 0.6123   | 1.035  | 0.9068 | 1.181  |
| rs12051539 | 84524038      | G        | C        | 0.1387   | 0.1487   | 0.4619   | 0.947  | 0.8192 | 1.095  |
| rs12149363 | 84486206      | C        | G        | 0.08625  | 0.09658  | 0.174    | 0.8859 | 0.744  | 1.055  |
| rs12149636 | 84528721      | C        | G        | 0.2959   | 0.3206   | 0.05682  | 0.8978 | 0.8035 | 1.003  |
| rs12149642 | 84528922      | C        | T        | 0.2901   | 0.3157   | 0.05999  | 0.8985 | 0.8036 | 1.005  |
| rs12325647 | 84476803      | A        | G        | 0.1488   | 0.1453   | 0.8571   | 1.013  | 0.8802 | 1.166  |
| rs12444221 | 84524786      | C        | T        | 0.09651  | 0.09806  | 0.6459   | 0.9605 | 0.8086 | 1.141  |
| rs12444486 | 84550150      | T        | C        | 0.4055   | 0.4166   | 0.2261   | 0.9395 | 0.8493 | 1.039  |
| rs12445476 | 84548770      | A        | C        | 0.07733  | 0.08398  | 0.06525  | 0.8411 | 0.6997 | 1.011  |
| rs12446139 | 84553085      | A        | G        | 0.1348   | 0.1536   | 0.0573   | 0.8682 | 0.7505 | 1.004  |
| rs12596341 | 84524541      | C        | A        | 0.01606  | 0.02187  | 0.06415  | 0.701  | 0.4813 | 1.021  |
| rs12598434 | 84530560      | G        | T        | 0.2923   | 0.3164   | 0.06936  | 0.9023 | 0.8075 | 1.008  |
| rs12598785 | 84521809      | A        | G        | 0.2231   | 0.2293   | 0.2527   | 0.9318 | 0.8255 | 1.052  |
| rs12711490 | 84530529      | T        | C        | 0.09201  | 0.0953   | 0.453    | 0.9349 | 0.7842 | 1.115  |
| rs12919427 | 84553160      | G        | A        | 0.135    | 0.1538   | 0.05963  | 0.8692 | 0.7513 | 1.006  |
| rs12923978 | 84503825      | T        | C        | 0.3585   | 0.3581   | 0.984    | 0.9989 | 0.8946 | 1.115  |
| rs12924316 | 84493764      | C        | T        | 0.04224  | 0.04503  | 0.427    | 0.9069 | 0.7125 | 1.154  |
| rs12926601 | 84459167      | G        | A        | 0.2807   | 0.2755   | 0.9079   | 1.007  | 0.8983 | 1.128  |
| rs12926854 | 84508759      | A        | G        | 0.1274   | 0.132    | 0.3643   | 0.9326 | 0.802  | 1.084  |
| rs12929551 | 84510511      | C        | T        | 0.04388  | 0.04097  | 0.7867   | 1.035  | 0.8088 | 1.323  |
| rs12930347 | 84461177      | A        | G        | 0.3327   | 0.3601   | 0.06123  | 0.903  | 0.8116 | 1.005  |
| rs12930405 | 84553163      | G        | C        | 0.135    | 0.1538   | 0.05963  | 0.8692 | 0.7513 | 1.006  |
| rs12935659 | 84463429      | A        | G        | 0.3365   | 0.3533   | 0.1667   | 0.9285 | 0.8358 | 1.031  |
| rs13330025 | 84495034      | A        | T        | 0.06673  | 0.06968  | 0.9563   | 0.9943 | 0.8117 | 1.218  |
| rs13330075 | 84495083      | A        | G        | 0.06702  | 0.07178  | 0.8085   | 0.9754 | 0.7974 | 1.193  |
| rs13330200 | 84458685      | A        | G        | 0.01933  | 0.01491  | 0.1147   | 1.368  | 0.9268 | 2.02   |
| rs13330932 | 84530208      | C        | T        | 0.2236   | 0.227    | 0.5393   | 0.9622 | 0.8509 | 1.088  |
| rs13331970 | 84505479      | G        | A        | 0.06667  | 0.08107  | 0.03973  | 0.8145 | 0.6699 | 0.9904 |
| rs13332649 | 84524184      | A        | G        | 0.0839   | 0.08434  | 0.8008   | 0.9764 | 0.8113 | 1.175  |
| rs13333193 | 84547043      | G        | A        | 0.02249  | 0.03428  | 0.001407 | 0.606  | 0.4457 | 0.8241 |
| rs13335265 | 84530311      | G        | C        | 0.08899  | 0.09455  | 0.2879   | 0.9068 | 0.7572 | 1.086  |
| rs13337463 | 84545523      | A        | G        | 0.2316   | 0.2485   | 0.2048   | 0.9256 | 0.8214 | 1.043  |
| rs13338943 | 84510452      | G        | T        | 0.1412   | 0.1522   | 0.2084   | 0.9118 | 0.7897 | 1.053  |
| rs1472235  | 84518468      | G        | A        | 0.2773   | 0.2736   | 0.2929   | 1.064  | 0.9481 | 1.193  |
| rs147968   | 84503340      | G        | A        | 0.3319   | 0.3202   | 0.3827   | 1.049  | 0.9424 | 1.167  |
| rs1519976  | 84503176      | G        | T        | 0.4312   | 0.4241   | 0.397    | 1.046  | 0.9428 | 1.16   |
| rs16882    | 84493074      | T        | C        | 0.2543   | 0.2524   | 0.449    | 1.046  | 0.9304 | 1.177  |
| rs16939834 | 84458109      | A        | C        | 0.1684   | 0.1651   | 0.3588   | 1.065  | 0.9308 | 1.219  |
| rs16939874 | 84475246      | G        | A        | 0.05161  | 0.05247  | 0.9861   | 1.002  | 0.7972 | 1.26   |
| rs16939906 | 84493007      | C        | T        | 0.03816  | 0.03577  | 0.7938   | 1.036  | 0.7924 | 1.356  |
| rs16939917 | 84499921      | T        | A        | 0.3217   | 0.3045   | 0.1791   | 1.08   | 0.9653 | 1.208  |
| rs16939930 | 84501600      | T        | A        | 0.05206  | 0.03876  | 0.02203  | 1.324  | 1.041  | 1.683  |
| rs16939941 | 84502705      | C        | T        | 0.05213  | 0.0387   | 0.02305  | 1.322  | 1.039  | 1.682  |
| rs16939967 | 84506974      | G        | T        | 0.0859   | 0.08315  | 0.8436   | 0.9821 | 0.8211 | 1.175  |
| rs16939969 | 84507645      | T        | C        | 0.2074   | 0.2217   | 0.1989   | 0.9219 | 0.8143 | 1.044  |
| rs16939975 | 84508399      | A        | G        | 0.05567  | 0.04663  | 0.1328   | 1.199  | 0.9463 | 1.519  |

| SNP        | Position (bp) | A2_major | A1_minor | MAF_case | MAF_ctrl | P         | OR     | L95    | U95    |
|------------|---------------|----------|----------|----------|----------|-----------|--------|--------|--------|
| rs16939982 | 84510004      | A        | G        | 0.05676  | 0.0508   | 0.09154   | 1.215  | 0.969  | 1.524  |
| rs16939994 | 84510669      | C        | G        | 0.04612  | 0.05348  | 0.03535   | 0.7796 | 0.6183 | 0.9831 |
| rs16940005 | 84511183      | G        | C        | 0.04334  | 0.041    | 0.8285    | 1.028  | 0.8031 | 1.315  |
| rs16940007 | 84511788      | C        | T        | 0.05956  | 0.05794  | 0.5167    | 1.075  | 0.8638 | 1.338  |
| rs16940009 | 84512089      | G        | C        | 0.1308   | 0.1299   | 0.8875    | 0.9893 | 0.852  | 1.149  |
| rs16940010 | 84512135      | C        | G        | 0.06964  | 0.06689  | 0.434     | 1.084  | 0.8856 | 1.327  |
| rs16940012 | 84512344      | A        | G        | 0.04539  | 0.03763  | 0.2083    | 1.177  | 0.9133 | 1.516  |
| rs16940020 | 84515007      | G        | A        | 0.06299  | 0.05635  | 0.519     | 1.072  | 0.8675 | 1.325  |
| rs16940023 | 84516215      | C        | T        | 0.1517   | 0.1324   | 0.02213   | 1.183  | 1.024  | 1.366  |
| rs16940044 | 84525266      | G        | A        | 0.4364   | 0.4772   | 0.0004732 | 0.8322 | 0.7507 | 0.9225 |
| rs16940083 | 84530130      | C        | T        | 0.222    | 0.2164   | 0.2431    | 1.078  | 0.9505 | 1.222  |
| rs16940087 | 84531752      | C        | T        | 0.1999   | 0.1907   | 0.09274   | 1.118  | 0.9817 | 1.273  |
| rs16940088 | 84531870      | C        | T        | 0.1668   | 0.1912   | 0.03709   | 0.867  | 0.7581 | 0.9915 |
| rs16940099 | 84533441      | T        | C        | 0.009855 | 0.0139   | 0.1324    | 0.7009 | 0.4413 | 1.113  |
| rs16940100 | 84533460      | C        | T        | 0.01283  | 0.01505  | 0.3773    | 0.8263 | 0.5409 | 1.262  |
| rs16940101 | 84535626      | A        | G        | 0.0275   | 0.03151  | 0.2013    | 0.8244 | 0.6131 | 1.109  |
| rs16940103 | 84535710      | G        | T        | 0.01901  | 0.02667  | 0.06562   | 0.7203 | 0.508  | 1.021  |
| rs16940104 | 84535711      | G        | T        | 0.02404  | 0.02809  | 0.21      | 0.8175 | 0.5967 | 1.12   |
| rs16940110 | 84537074      | T        | C        | 0.02353  | 0.02179  | 0.5638    | 1.109  | 0.7813 | 1.573  |
| rs170033   | 84489005      | G        | A        | 0.4359   | 0.4517   | 0.3851    | 0.955  | 0.8609 | 1.06   |
| rs172573   | 84500925      | A        | G        | 0.05803  | 0.06799  | 0.1426    | 0.8562 | 0.6958 | 1.054  |
| rs17444745 | 84519063      | G        | A        | 0.03504  | 0.03702  | 0.4495    | 0.9002 | 0.6855 | 1.182  |
| rs17810337 | 84551566      | C        | A        | 0.09398  | 0.1046   | 0.1853    | 0.8925 | 0.7543 | 1.056  |
| rs182511   | 84495157      | C        | G        | 0.09498  | 0.1027   | 0.2577    | 0.905  | 0.7614 | 1.076  |
| rs186249   | 84528397      | G        | C        | 0.2983   | 0.2696   | 0.01661   | 1.148  | 1.025  | 1.286  |
| rs1879213  | 84530977      | C        | T        | 0.1662   | 0.1891   | 0.05376   | 0.8762 | 0.766  | 1.002  |
| rs188602   | 84489852      | C        | T        | 0.3499   | 0.3706   | 0.2015    | 0.9335 | 0.8399 | 1.037  |
| rs191022   | 84489633      | C        | G        | 0.4561   | 0.4666   | 0.3754    | 0.9552 | 0.8632 | 1.057  |
| rs1915033  | 84542932      | C        | T        | 0.3419   | 0.3576   | 0.2536    | 0.941  | 0.8476 | 1.045  |
| rs1915034  | 84542858      | G        | A        | 0.2031   | 0.2187   | 0.07443   | 0.8943 | 0.7911 | 1.011  |
| rs2017161  | 84470594      | A        | C        | 0.3134   | 0.3382   | 0.01335   | 0.8739 | 0.7854 | 0.9724 |
| rs2049086  | 84552380      | G        | T        | 0.1347   | 0.1536   | 0.06223   | 0.8698 | 0.7512 | 1.007  |
| rs2172625  | 84522286      | T        | C        | 0.124    | 0.1213   | 0.6325    | 1.039  | 0.8877 | 1.216  |
| rs2270501  | 84490489      | C        | T        | 0.03635  | 0.03506  | 0.9263    | 0.9876 | 0.7576 | 1.287  |
| rs2280378  | 84510246      | G        | A        | 0.3363   | 0.337    | 0.9165    | 1.006  | 0.9035 | 1.12   |
| rs2292980  | 84502577      | T        | C        | 0.4889   | 0.49     | 0.825     | 0.9885 | 0.8925 | 1.095  |
| rs2292982  | 84502324      | G        | T        | 0.4141   | 0.4094   | 0.8134    | 1.012  | 0.9135 | 1.122  |
| rs2361763  | 84550635      | T        | C        | 0.2847   | 0.2881   | 0.9857    | 1.001  | 0.8947 | 1.12   |
| rs2361764  | 84550459      | C        | G        | 0.212    | 0.2275   | 0.2631    | 0.9328 | 0.8259 | 1.054  |
| rs28366896 | 84505943      | G        | A        | 0.0687   | 0.07931  | 0.1254    | 0.8584 | 0.7061 | 1.043  |
| rs28368112 | 84488458      | G        | C        | 0.1371   | 0.1251   | 0.2241    | 1.098  | 0.9446 | 1.275  |
| rs28407896 | 84507957      | C        | T        | 0.2056   | 0.2209   | 0.1699    | 0.9167 | 0.8097 | 1.038  |
| rs28552575 | 84506805      | A        | T        | 0.1974   | 0.2128   | 0.2063    | 0.9219 | 0.8126 | 1.046  |
| rs28631400 | 84507948      | C        | T        | 0.2056   | 0.2209   | 0.1699    | 0.9167 | 0.8097 | 1.038  |
| rs2885364  | 84550691      | A        | T        | 0.09532  | 0.1073   | 0.133     | 0.8801 | 0.745  | 1.04   |
| rs2934497  | 84525379      | T        | C        | 0.4367   | 0.4772   | 0.0005118 | 0.8331 | 0.7515 | 0.9235 |
| rs2934498  | 84525783      | G        | A        | 0.4367   | 0.4776   | 0.0004088 | 0.8305 | 0.7492 | 0.9206 |
| rs2934499  | 84527604      | C        | T        | 0.07855  | 0.09756  | 0.003049  | 0.7591 | 0.6326 | 0.9109 |
| rs2970090  | 84525392      | A        | G        | 0.2141   | 0.2397   | 0.003978  | 0.8367 | 0.741  | 0.9446 |
| rs2970091  | 84525387      | A        | G        | 0.4368   | 0.4772   | 0.0005314 | 0.8336 | 0.752  | 0.924  |
| rs2970092  | 84522649      | G        | A        | 0.04289  | 0.04252  | 0.7174    | 1.047  | 0.8159 | 1.344  |
| rs2970093  | 84522329      | C        | T        | 0.1272   | 0.126    | 0.6623    | 1.035  | 0.8874 | 1.207  |
| rs305059   | 84533519      | A        | G        | 0.1629   | 0.1784   | 0.02697   | 0.8589 | 0.7506 | 0.9828 |
| rs305060   | 84533417      | C        | T        | 0.1615   | 0.177    | 0.02917   | 0.8607 | 0.7522 | 0.9849 |
| rs305061   | 84533160      | T        | C        | 0.1526   | 0.1594   | 0.1476    | 0.9024 | 0.7853 | 1.037  |
| rs305064   | 84531643      | G        | A        | 0.0742   | 0.0885   | 0.01178   | 0.7894 | 0.6568 | 0.9489 |
| rs305065   | 84531367      | C        | G        | 0.07279  | 0.08696  | 0.01305   | 0.7905 | 0.6565 | 0.9517 |
| rs305067   | 84529341      | G        | C        | 0.07796  | 0.09248  | 0.01417   | 0.7945 | 0.661  | 0.9548 |
| rs305069   | 84507059      | C        | T        | 0.1749   | 0.1701   | 0.8635    | 1.012  | 0.8796 | 1.165  |
| rs305070   | 84506925      | A        | G        | 0.103    | 0.1137   | 0.1795    | 0.8951 | 0.7615 | 1.052  |



| SNP        | Position (bp) | A2_major | A1_minor | MAF_case | MAF_ctrl | P         | OR     | L95    | U95    |
|------------|---------------|----------|----------|----------|----------|-----------|--------|--------|--------|
| rs305071   | 84506772      | G        | A        | 0.2856   | 0.3096   | 0.0697    | 0.9034 | 0.8094 | 1.008  |
| rs305072   | 84513164      | A        | G        | 0.09311  | 0.09181  | 0.3509    | 1.088  | 0.9116 | 1.298  |
| rs305073   | 84515294      | T        | C        | 0.4354   | 0.4398   | 0.3859    | 0.9555 | 0.8621 | 1.059  |
| rs305074   | 84515321      | C        | T        | 0.4224   | 0.4335   | 0.1989    | 0.9343 | 0.8422 | 1.036  |
| rs305075   | 84517136      | G        | T        | 0.2098   | 0.2232   | 0.09983   | 0.9016 | 0.797  | 1.02   |
| rs305077   | 84500967      | C        | T        | 0.4038   | 0.3954   | 0.6874    | 1.021  | 0.9221 | 1.131  |
| rs305078   | 84500644      | A        | G        | 0.1956   | 0.2013   | 0.7908    | 0.983  | 0.8661 | 1.116  |
| rs305079   | 84499997      | T        | C        | 0.3377   | 0.3331   | 0.6497    | 1.025  | 0.9205 | 1.142  |
| rs305080   | 84499275      | T        | C        | 0.3768   | 0.3826   | 0.5801    | 0.9708 | 0.8742 | 1.078  |
| rs305081   | 84498831      | A        | C        | 0.04625  | 0.04843  | 0.8905    | 1.017  | 0.796  | 1.3    |
| rs305082   | 84494479      | C        | T        | 0.4744   | 0.4814   | 0.3927    | 0.9564 | 0.8635 | 1.059  |
| rs305083   | 84493379      | A        | G        | 0.3883   | 0.3771   | 0.5794    | 1.031  | 0.9264 | 1.147  |
| rs305084   | 84491669      | T        | C        | 0.01378  | 0.02101  | 0.01181   | 0.6033 | 0.4071 | 0.8941 |
| rs305085   | 84490744      | G        | A        | 0.01948  | 0.02269  | 0.6558    | 0.9219 | 0.6447 | 1.318  |
| rs305086   | 84540022      | G        | A        | 0.3657   | 0.3496   | 0.1822    | 1.074  | 0.9672 | 1.192  |
| rs305088   | 84539102      | C        | T        | 0.08918  | 0.1032   | 0.02869   | 0.8243 | 0.6933 | 0.9801 |
| rs305089   | 84538531      | C        | T        | 0.09856  | 0.1126   | 0.01646   | 0.8196 | 0.6966 | 0.9643 |
| rs305090   | 84536847      | C        | T        | 0.1928   | 0.2047   | 0.03678   | 0.8731 | 0.7687 | 0.9917 |
| rs305091   | 84536744      | G        | A        | 0.1078   | 0.1203   | 0.02981   | 0.8395 | 0.7169 | 0.983  |
| rs305092   | 84536618      | G        | A        | 0.1537   | 0.1675   | 0.02396   | 0.854  | 0.7447 | 0.9794 |
| rs305093   | 84536086      | C        | T        | 0.09754  | 0.1098   | 0.03853   | 0.8406 | 0.7131 | 0.9909 |
| rs305094   | 84535606      | T        | C        | 0.1651   | 0.1712   | 0.1414    | 0.9033 | 0.7889 | 1.034  |
| rs305095   | 84535500      | C        | T        | 0.4964   | 0.4653   | 0.002335  | 1.167  | 1.057  | 1.29   |
| rs305096   | 84535433      | C        | T        | 0.04967  | 0.04535  | 0.2286    | 1.16   | 0.9109 | 1.478  |
| rs305097   | 84535412      | G        | A        | 0.4844   | 0.4532   | 0.002259  | 1.174  | 1.059  | 1.302  |
| rs34337659 | 84525158      | C        | T        | 0.4364   | 0.4775   | 0.0003973 | 0.8303 | 0.749  | 0.9203 |
| rs366078   | 84522064      | T        | C        | 0.1271   | 0.1244   | 0.5904    | 1.043  | 0.8939 | 1.218  |
| rs366304   | 84502301      | G        | T        | 0.0946   | 0.1097   | 0.2249    | 0.9007 | 0.7608 | 1.066  |
| rs369173   | 84486783      | C        | A        | 0.331    | 0.3273   | 0.8327    | 1.012  | 0.9083 | 1.127  |
| rs369597   | 84486935      | A        | G        | 0.4306   | 0.438    | 0.6521    | 0.9768 | 0.8821 | 1.082  |
| rs370703   | 84477981      | G        | A        | 0.4646   | 0.4862   | 0.2433    | 0.9426 | 0.8535 | 1.041  |
| rs371391   | 84487395      | A        | G        | 0.4255   | 0.4303   | 0.7922    | 0.9862 | 0.8896 | 1.093  |
| rs371800   | 84475621      | C        | A        | 0.28     | 0.2692   | 0.2443    | 1.07   | 0.955  | 1.198  |
| rs375288   | 84485372      | A        | G        | 0.3494   | 0.3565   | 0.5944    | 0.9713 | 0.8725 | 1.081  |
| rs376783   | 84475324      | G        | A        | 0.2443   | 0.25     | 0.8528    | 0.9892 | 0.8823 | 1.109  |
| rs3794661  | 84497167      | G        | A        | 0.0213   | 0.01888  | 0.1469    | 1.313  | 0.9088 | 1.896  |
| rs380458   | 84487686      | A        | G        | 0.04775  | 0.05371  | 0.3742    | 0.8991 | 0.711  | 1.137  |
| rs381139   | 84487901      | A        | G        | 0.4259   | 0.4317   | 0.7679    | 0.9846 | 0.8879 | 1.092  |
| rs383425   | 84522540      | C        | T        | 0.4744   | 0.4826   | 0.6788    | 0.9783 | 0.8819 | 1.085  |
| rs383628   | 84486141      | G        | C        | 0.06923  | 0.07735  | 0.3591    | 0.9128 | 0.7511 | 1.109  |
| rs384915   | 84477113      | G        | A        | 0.09422  | 0.09679  | 0.7639    | 1.027  | 0.864  | 1.22   |
| rs385989   | 84526509      | G        | T        | 0.2151   | 0.2397   | 0.004842  | 0.8403 | 0.7445 | 0.9484 |
| rs386098   | 84486701      | G        | A        | 0.4318   | 0.4456   | 0.3687    | 0.9544 | 0.8619 | 1.057  |
| rs388405   | 84487398      | G        | A        | 0.4308   | 0.4406   | 0.5374    | 0.9686 | 0.8751 | 1.072  |
| rs388988   | 84523302      | G        | T        | 0.1268   | 0.1259   | 0.7012    | 1.031  | 0.8834 | 1.202  |
| rs391023   | 84485315      | A        | G        | 0.2523   | 0.2647   | 0.1417    | 0.9159 | 0.8147 | 1.03   |
| rs391525   | 84501940      | A        | G        | 0.3932   | 0.4039   | 0.6431    | 0.9759 | 0.8804 | 1.082  |
| rs391821   | 84479528      | C        | A        | 0.08328  | 0.09702  | 0.243     | 0.8988 | 0.7514 | 1.075  |
| rs391855   | 84486122      | T        | A        | 0.2564   | 0.2645   | 0.3289    | 0.9442 | 0.8413 | 1.06   |
| rs395922   | 84478180      | G        | C        | 0.3103   | 0.2964   | 0.1519    | 1.086  | 0.9702 | 1.215  |
| rs396987   | 84526435      | G        | A        | 0.4347   | 0.475    | 0.0005438 | 0.8341 | 0.7526 | 0.9244 |
| rs399280   | 84522499      | C        | G        | 0.1288   | 0.1281   | 0.7188    | 1.029  | 0.8817 | 1.2    |
| rs403038   | 84506572      | G        | A        | 0.04585  | 0.04832  | 0.5514    | 0.9275 | 0.7241 | 1.188  |
| rs403605   | 84485129      | G        | A        | 0.2171   | 0.2345   | 0.1834    | 0.9216 | 0.8173 | 1.039  |
| rs409661   | 84506575      | G        | C        | 0.03445  | 0.03378  | 0.57      | 1.086  | 0.8178 | 1.441  |
| rs411221   | 84523460      | G        | C        | 0.1636   | 0.1566   | 0.4184    | 1.059  | 0.9215 | 1.218  |
| rs413529   | 84486520      | G        | A        | 0.06389  | 0.07099  | 0.3506    | 0.9082 | 0.742  | 1.112  |
| rs419030   | 84524302      | A        | G        | 0.4123   | 0.4498   | 0.0007103 | 0.8362 | 0.754  | 0.9275 |
| rs421710   | 84481015      | G        | C        | 0.3292   | 0.3216   | 0.966     | 0.9977 | 0.8967 | 1.11   |
| rs422186   | 84489971      | G        | A        | 0.4329   | 0.4466   | 0.3355    | 0.9497 | 0.855  | 1.055  |

| SNP        | Position (bp) | A2_major | A1_minor | MAF_case | MAF_ctrl | P         | OR     | L95    | U95    |
|------------|---------------|----------|----------|----------|----------|-----------|--------|--------|--------|
| rs4240807  | 84542862      | C        | A        | 0.191    | 0.2052   | 0.1012    | 0.901  | 0.7955 | 1.021  |
| rs424971   | 84503951      | C        | T        | 0.2638   | 0.2634   | 0.8318    | 0.9875 | 0.8795 | 1.109  |
| rs428530   | 84480360      | A        | G        | 0.1869   | 0.1748   | 0.04489   | 1.145  | 1.003  | 1.306  |
| rs434216   | 84484514      | G        | A        | 0.1536   | 0.1678   | 0.05862   | 0.8706 | 0.7542 | 1.005  |
| rs437291   | 84525009      | C        | T        | 0.2135   | 0.2404   | 0.002561  | 0.8296 | 0.7348 | 0.9367 |
| rs439390   | 84476707      | G        | A        | 0.4386   | 0.4374   | 0.9465    | 1.003  | 0.9067 | 1.111  |
| rs439885   | 84526175      | A        | G        | 0.4351   | 0.4751   | 0.000582  | 0.8349 | 0.7533 | 0.9253 |
| rs440222   | 84501917      | C        | T        | 0.1343   | 0.1439   | 0.6999    | 0.9717 | 0.8397 | 1.124  |
| rs447632   | 84525141      | G        | A        | 0.4086   | 0.4425   | 0.003832  | 0.8602 | 0.7768 | 0.9526 |
| rs447919   | 84526058      | C        | T        | 0.09046  | 0.1119   | 0.0007977 | 0.7501 | 0.634  | 0.8874 |
| rs448136   | 84478848      | C        | A        | 0.2765   | 0.2714   | 0.8435    | 0.9887 | 0.8827 | 1.107  |
| rs450443   | 84526392      | G        | T        | 0.4026   | 0.4486   | 0.0001407 | 0.8178 | 0.7374 | 0.9071 |
| rs4843854  | 84460016      | G        | C        | 0.4941   | 0.5044   | 0.7165    | 0.9816 | 0.8877 | 1.085  |
| rs4843856  | 84460058      | A        | C        | 0.4777   | 0.4815   | 0.9475    | 1.003  | 0.9083 | 1.108  |
| rs4843859  | 84489457      | C        | G        | 0.03904  | 0.03746  | 0.8587    | 0.9769 | 0.7551 | 1.264  |
| rs4843860  | 84508422      | A        | G        | 0.1303   | 0.1337   | 0.4922    | 0.9489 | 0.8169 | 1.102  |
| rs4843861  | 84508477      | A        | T        | 0.3339   | 0.3529   | 0.08242   | 0.9098 | 0.8178 | 1.012  |
| rs4843865  | 84526806      | T        | A        | 0.127    | 0.1303   | 0.6675    | 0.9674 | 0.8317 | 1.125  |
| rs4843866  | 84528151      | C        | T        | 0.2747   | 0.2956   | 0.1269    | 0.9114 | 0.809  | 1.027  |
| rs4843868  | 84530902      | C        | T        | 0.1221   | 0.1251   | 0.5818    | 0.9575 | 0.8203 | 1.118  |
| rs4843869  | 84532642      | G        | A        | 0.08822  | 0.09159  | 0.4187    | 0.9287 | 0.7762 | 1.111  |
| rs4843871  | 84543036      | A        | G        | 0.3411   | 0.3573   | 0.24      | 0.9392 | 0.846  | 1.043  |
| rs4843872  | 84543172      | G        | A        | 0.2842   | 0.2978   | 0.1806    | 0.9276 | 0.8309 | 1.035  |
| rs4843873  | 84547276      | G        | A        | 0.09118  | 0.1074   | 0.04231   | 0.8374 | 0.7055 | 0.9939 |
| rs4843874  | 84547399      | T        | C        | 0.09633  | 0.1137   | 0.03035   | 0.8323 | 0.7049 | 0.9827 |
| rs4843876  | 84550233      | A        | T        | 0.1835   | 0.2      | 0.1676    | 0.9139 | 0.8042 | 1.039  |
| rs4843877  | 84550733      | G        | C        | 0.09586  | 0.1065   | 0.1668    | 0.8895 | 0.7534 | 1.05   |
| rs523642   | 84523096      | G        | A        | 0.1265   | 0.1249   | 0.6539    | 1.036  | 0.8878 | 1.209  |
| rs524432   | 84523155      | T        | C        | 0.1267   | 0.1253   | 0.6791    | 1.033  | 0.8855 | 1.205  |
| rs56239618 | 84525421      | A        | G        | 0.01668  | 0.01485  | 0.7665    | 1.062  | 0.7139 | 1.58   |
| rs56250418 | 84530999      | G        | T        | 0.01669  | 0.01543  | 0.8784    | 1.031  | 0.6953 | 1.529  |
| rs56834409 | 84532277      | A        | G        | 0.1676   | 0.1912   | 0.04511   | 0.8719 | 0.7624 | 0.997  |
| rs57396687 | 84542701      | G        | A        | 0.08223  | 0.08282  | 0.9899    | 1.001  | 0.8366 | 1.198  |
| rs57426547 | 84543596      | C        | T        | 0.1494   | 0.1497   | 0.6655    | 1.032  | 0.8957 | 1.188  |
| rs57670691 | 84542583      | G        | A        | 0.08223  | 0.08282  | 0.9902    | 1.001  | 0.8366 | 1.198  |
| rs57770209 | 84509594      | C        | T        | 0.05697  | 0.05144  | 0.2336    | 1.146  | 0.916  | 1.433  |
| rs58073431 | 84543416      | G        | C        | 0.2614   | 0.2558   | 0.4833    | 1.044  | 0.9249 | 1.179  |
| rs58189590 | 84543560      | G        | A        | 0.1497   | 0.1497   | 0.6482    | 1.033  | 0.8973 | 1.19   |
| rs58574202 | 84489034      | C        | T        | 0.0593   | 0.05477  | 0.5546    | 1.068  | 0.8579 | 1.331  |
| rs58980382 | 84523934      | C        | T        | 0.09555  | 0.09714  | 0.7931    | 0.9771 | 0.8218 | 1.162  |
| rs59015387 | 84554628      | T        | A        | 0.01903  | 0.02047  | 0.7929    | 0.9512 | 0.6546 | 1.382  |
| rs59120392 | 84544797      | C        | T        | 0.1791   | 0.1785   | 0.6283    | 1.033  | 0.9054 | 1.179  |
| rs59370928 | 84510611      | G        | A        | 0.05632  | 0.05072  | 0.1373    | 1.188  | 0.9466 | 1.49   |
| rs59403904 | 84543458      | C        | T        | 0.1518   | 0.1507   | 0.5775    | 1.041  | 0.9032 | 1.2    |
| rs59479659 | 84543225      | T        | G        | 0.1302   | 0.1299   | 0.8412    | 0.9845 | 0.8451 | 1.147  |
| rs59821663 | 84543420      | G        | A        | 0.08222  | 0.08338  | 0.8912    | 0.9875 | 0.8252 | 1.182  |
| rs59865900 | 84514317      | G        | A        | 0.06413  | 0.05922  | 0.2799    | 1.124  | 0.9096 | 1.388  |
| rs60218704 | 84521854      | T        | C        | 0.1147   | 0.1192   | 0.5108    | 0.9463 | 0.8028 | 1.116  |
| rs61464600 | 84545305      | A        | G        | 0.1783   | 0.1785   | 0.7003    | 1.026  | 0.8998 | 1.17   |
| rs62051024 | 84535456      | A        | C        | 0.05409  | 0.04374  | 0.03775   | 1.291  | 1.015  | 1.642  |
| rs6540231  | 84473561      | G        | C        | 0.333    | 0.3249   | 0.5325    | 1.034  | 0.9302 | 1.15   |
| rs6540234  | 84540557      | C        | T        | 0.06894  | 0.08134  | 0.02755   | 0.8056 | 0.6647 | 0.9764 |
| rs6540235  | 84546396      | C        | T        | 0.3498   | 0.3716   | 0.09813   | 0.9158 | 0.8251 | 1.016  |
| rs6540236  | 84548591      | G        | A        | 0.08538  | 0.09899  | 0.08422   | 0.8567 | 0.7188 | 1.021  |
| rs6540237  | 84548593      | C        | T        | 0.1161   | 0.1162   | 0.6249    | 1.041  | 0.887  | 1.221  |
| rs6540238  | 84549328      | G        | A        | 0.08865  | 0.1012   | 0.1089    | 0.869  | 0.732  | 1.032  |
| rs66509440 | 84525182      | T        | C        | 0.4364   | 0.4775   | 0.0003973 | 0.8303 | 0.749  | 0.9203 |
| rs66804793 | 84525190      | A        | G        | 0.4364   | 0.4778   | 0.0003839 | 0.8298 | 0.7487 | 0.9198 |
| rs7185022  | 84510430      | C        | A        | 0.1034   | 0.1047   | 0.3911    | 0.9271 | 0.7797 | 1.102  |
| rs7185590  | 84549154      | C        | A        | 0.1152   | 0.1177   | 0.8901    | 1.011  | 0.8621 | 1.186  |

| SNP        | Position (bp) | A2_major | A1_minor | MAF_case | MAF_ctrl | P         | OR     | L95    | U95    |
|------------|---------------|----------|----------|----------|----------|-----------|--------|--------|--------|
| rs7185918  | 84458566      | G        | A        | 0.1604   | 0.1691   | 0.4569    | 0.9503 | 0.8308 | 1.087  |
| rs7190319  | 84536046      | A        | G        | 0.2241   | 0.2443   | 0.1136    | 0.9071 | 0.804  | 1.024  |
| rs7193803  | 84483174      | A        | C        | 0.3925   | 0.4102   | 0.261     | 0.9429 | 0.8511 | 1.045  |
| rs7199277  | 84518551      | T        | G        | 0.04448  | 0.04426  | 0.7392    | 1.043  | 0.8124 | 1.34   |
| rs7199472  | 84546685      | T        | G        | 0.2707   | 0.2811   | 0.4417    | 0.9573 | 0.8567 | 1.07   |
| rs7200248  | 84549137      | T        | C        | 0.1301   | 0.1289   | 0.5807    | 1.044  | 0.8969 | 1.214  |
| rs7200264  | 84549163      | T        | C        | 0.1362   | 0.1335   | 0.4489    | 1.061  | 0.9098 | 1.238  |
| rs7200739  | 84478427      | A        | G        | 0.06505  | 0.06108  | 0.3186    | 1.111  | 0.9033 | 1.367  |
| rs7202472  | 84535003      | G        | T        | 0.08596  | 0.08949  | 0.3965    | 0.9248 | 0.7719 | 1.108  |
| rs7204443  | 84544590      | C        | T        | 0.06031  | 0.05446  | 0.374     | 1.106  | 0.8855 | 1.382  |
| rs7205434  | 84530696      | C        | G        | 0.08837  | 0.09136  | 0.4849    | 0.938  | 0.7839 | 1.122  |
| rs7206172  | 84517721      | G        | A        | 0.008847 | 0.01247  | 0.04171   | 0.6006 | 0.3677 | 0.981  |
| rs731707   | 84538469      | C        | T        | 0.3475   | 0.3785   | 0.003592  | 0.854  | 0.7679 | 0.9497 |
| rs731709   | 84538088      | T        | C        | 0.1655   | 0.1527   | 0.1176    | 1.117  | 0.9725 | 1.283  |
| rs73264969 | 84506515      | C        | G        | 0.07084  | 0.06282  | 0.1638    | 1.156  | 0.9428 | 1.416  |
| rs73266812 | 84517410      | A        | T        | 0.1092   | 0.1122   | 0.7277    | 1.03   | 0.8714 | 1.218  |
| rs73266822 | 84524751      | G        | A        | 0.03342  | 0.0317   | 0.6163    | 1.076  | 0.8077 | 1.434  |
| rs73266828 | 84525329      | A        | G        | 0.03377  | 0.03171  | 0.5704    | 1.086  | 0.8159 | 1.447  |
| rs73266846 | 84531335      | A        | T        | 0.1444   | 0.1363   | 0.5233    | 1.05   | 0.9047 | 1.218  |
| rs73268908 | 84544290      | C        | A        | 0.1494   | 0.1498   | 0.6861    | 1.03   | 0.8939 | 1.186  |
| rs73268912 | 84544401      | C        | A        | 0.08222  | 0.08291  | 0.9341    | 0.9924 | 0.829  | 1.188  |
| rs73268919 | 84545536      | G        | A        | 0.1781   | 0.1785   | 0.7153    | 1.025  | 0.8986 | 1.169  |
| rs73268923 | 84546268      | C        | T        | 0.08161  | 0.08151  | 0.9617    | 1.004  | 0.8382 | 1.204  |
| rs73268928 | 84547653      | C        | G        | 0.08826  | 0.08602  | 0.7656    | 1.028  | 0.8566 | 1.234  |
| rs74032085 | 84525245      | C        | T        | 0.4364   | 0.4772   | 0.0004724 | 0.8321 | 0.7507 | 0.9224 |
| rs74032515 | 84558875      | C        | G        | 0.01204  | 0.01194  | 0.8184    | 0.9453 | 0.5849 | 1.528  |
| rs768410   | 84503229      | G        | T        | 0.4316   | 0.4247   | 0.4101    | 1.045  | 0.9416 | 1.159  |
| rs8044852  | 84552728      | G        | A        | 0.1399   | 0.1577   | 0.07119   | 0.8762 | 0.759  | 1.011  |
| rs8045825  | 84527979      | C        | G        | 0.2744   | 0.2954   | 0.1229    | 0.9105 | 0.8082 | 1.026  |
| rs8045988  | 84521891      | G        | A        | 0.02063  | 0.01712  | 0.4044    | 1.168  | 0.8108 | 1.682  |
| rs8047292  | 84541556      | T        | A        | 0.03604  | 0.04807  | 0.006719  | 0.7058 | 0.5486 | 0.908  |
| rs8048151  | 84546099      | T        | C        | 0.1328   | 0.1528   | 0.0556    | 0.8648 | 0.7452 | 1.003  |
| rs8050476  | 84530705      | A        | G        | 0.2474   | 0.245    | 0.5018    | 1.041  | 0.925  | 1.173  |
| rs8051122  | 84473919      | A        | G        | 0.04032  | 0.03376  | 0.1093    | 1.248  | 0.9516 | 1.638  |
| rs8051462  | 84504828      | G        | A        | 0.4512   | 0.438    | 0.2592    | 1.061  | 0.9573 | 1.176  |
| rs8052521  | 84516230      | C        | T        | 0.4439   | 0.4375   | 0.1921    | 1.071  | 0.9661 | 1.187  |
| rs8052690  | 84527239      | A        | G        | 0.1496   | 0.152    | 0.6618    | 0.9691 | 0.8421 | 1.115  |
| rs8056522  | 84464397      | A        | G        | 0.2263   | 0.2364   | 0.4986    | 0.9601 | 0.8533 | 1.08   |
| rs8057009  | 84548424      | T        | G        | 0.1992   | 0.1884   | 0.1646    | 1.095  | 0.9634 | 1.245  |
| rs8058349  | 84489530      | C        | G        | 0.1406   | 0.1523   | 0.3176    | 0.9294 | 0.8051 | 1.073  |
| rs8058904  | 84509183      | A        | G        | 0.03506  | 0.04227  | 0.1964    | 0.839  | 0.6428 | 1.095  |
| rs8059127  | 84506690      | G        | T        | 0.1286   | 0.1471   | 0.03089   | 0.85   | 0.7334 | 0.9852 |
| rs8059144  | 84527977      | T        | C        | 0.2742   | 0.2954   | 0.1198    | 0.9098 | 0.8075 | 1.025  |
| rs8060078  | 84542153      | G        | T        | 0.1769   | 0.1677   | 0.1328    | 1.109  | 0.9692 | 1.268  |
| rs8060960  | 84545861      | C        | T        | 0.2957   | 0.3031   | 0.6464    | 0.975  | 0.8749 | 1.086  |
| rs8062669  | 84530493      | C        | T        | 0.2395   | 0.2374   | 0.5535    | 1.037  | 0.9197 | 1.169  |
| rs8064189  | 84509297      | T        | G        | 0.4855   | 0.4628   | 0.0393    | 1.113  | 1.005  | 1.232  |
| rs875527   | 84524231      | G        | A        | 0.151    | 0.1626   | 0.4283    | 0.9451 | 0.8218 | 1.087  |
| rs875529   | 84524187      | G        | C        | 0.2207   | 0.2317   | 0.3619    | 0.9448 | 0.8362 | 1.067  |
| rs878453   | 84523664      | T        | C        | 0.2951   | 0.2985   | 0.6892    | 0.9773 | 0.8735 | 1.093  |
| rs878454   | 84523673      | G        | A        | 0.05767  | 0.05158  | 0.2847    | 1.132  | 0.9023 | 1.419  |
| rs880364   | 84516666      | G        | A        | 0.4934   | 0.4986   | 0.4083    | 0.9576 | 0.8641 | 1.061  |
| rs880365   | 84516863      | C        | T        | 0.4905   | 0.4831   | 0.2717    | 1.059  | 0.9558 | 1.174  |
| rs880366   | 84516939      | C        | T        | 0.4738   | 0.4754   | 0.7179    | 0.9812 | 0.885  | 1.088  |
| rs883332   | 84552225      | T        | C        | 0.03473  | 0.02982  | 0.248     | 1.183  | 0.8895 | 1.573  |
| rs896263   | 84485020      | C        | G        | 0.4583   | 0.4701   | 0.3253    | 0.95   | 0.8578 | 1.052  |
| rs903201   | 84523785      | T        | C        | 0.213    | 0.2246   | 0.2655    | 0.9308 | 0.8204 | 1.056  |
| rs908981   | 84552926      | C        | T        | 0.135    | 0.1538   | 0.05963   | 0.8692 | 0.7513 | 1.006  |
| rs908982   | 84552384      | C        | A        | 0.1347   | 0.1536   | 0.06223   | 0.8698 | 0.7512 | 1.007  |
| rs908983   | 84552021      | T        | C        | 0.1422   | 0.1596   | 0.09156   | 0.885  | 0.7679 | 1.02   |

| SNP       | Position (bp) | A2_major | A1_minor | MAF_case | MAF_ctrl | P         | OR     | L95    | U95    |
|-----------|---------------|----------|----------|----------|----------|-----------|--------|--------|--------|
| rs908984  | 84542530      | A        | T        | 0.2737   | 0.2896   | 0.1246    | 0.918  | 0.8231 | 1.024  |
| rs908985  | 84542503      | C        | T        | 0.3353   | 0.3528   | 0.2309    | 0.9375 | 0.8437 | 1.042  |
| rs908988  | 84542101      | A        | G        | 0.3073   | 0.3146   | 0.3009    | 0.9456 | 0.8504 | 1.051  |
| rs925992  | 84548081      | C        | T        | 0.08792  | 0.1067   | 0.01525   | 0.8075 | 0.6793 | 0.9597 |
| rs925993  | 84547852      | C        | T        | 0.0844   | 0.09948  | 0.04785   | 0.8352 | 0.6988 | 0.9983 |
| rs925994  | 84503518      | C        | A        | 0.1354   | 0.1275   | 0.178     | 1.11   | 0.9537 | 1.291  |
| rs9308363 | 84481566      | A        | G        | 0.3725   | 0.3755   | 0.9295    | 0.9951 | 0.8926 | 1.109  |
| rs965773  | 84537847      | A        | C        | 0.3887   | 0.4171   | 0.005254  | 0.862  | 0.7766 | 0.9567 |
| rs9924391 | 84487331      | C        | A        | 0.3308   | 0.3354   | 0.7154    | 0.9801 | 0.8799 | 1.092  |
| rs9924484 | 84509239      | C        | G        | 0.463    | 0.4379   | 0.03266   | 1.122  | 1.01   | 1.247  |
| rs9924488 | 84509249      | C        | G        | 0.3193   | 0.3321   | 0.2927    | 0.9414 | 0.8412 | 1.053  |
| rs9925103 | 84472609      | C        | G        | 0.1157   | 0.1206   | 0.6434    | 0.964  | 0.8256 | 1.126  |
| rs9925859 | 84525223      | G        | C        | 0.08884  | 0.1097   | 0.000951  | 0.7514 | 0.6343 | 0.8902 |
| rs9926067 | 84508696      | A        | G        | 0.2047   | 0.2154   | 0.3665    | 0.9438 | 0.8324 | 1.07   |
| rs9926411 | 84509158      | A        | G        | 0.3321   | 0.3065   | 0.02069   | 1.136  | 1.02   | 1.265  |
| rs9926664 | 84496256      | A        | G        | 0.3      | 0.2973   | 0.8603    | 1.01   | 0.905  | 1.127  |
| rs9927123 | 84531682      | G        | A        | 0.5092   | 0.4878   | 0.06333   | 1.102  | 0.9946 | 1.222  |
| rs9928776 | 84506960      | G        | T        | 0.2047   | 0.2185   | 0.2205    | 0.9248 | 0.8161 | 1.048  |
| rs9928868 | 84476971      | G        | C        | 0.1382   | 0.1271   | 0.1731    | 1.108  | 0.956  | 1.284  |
| rs9929895 | 84525236      | T        | A        | 0.4302   | 0.4707   | 0.0007171 | 0.8352 | 0.7525 | 0.927  |
| rs9930043 | 84465079      | G        | C        | 0.2276   | 0.2454   | 0.042     | 0.8846 | 0.786  | 0.9956 |
| rs9931687 | 84473282      | G        | A        | 0.3637   | 0.3468   | 0.06885   | 1.103  | 0.9924 | 1.226  |
| rs9931862 | 84472878      | G        | A        | 0.165    | 0.1665   | 0.92      | 1.007  | 0.8788 | 1.154  |
| rs9932159 | 84470103      | G        | A        | 0.3174   | 0.3419   | 0.01356   | 0.8743 | 0.7859 | 0.9727 |
| rs9933690 | 84550796      | C        | T        | 0.1839   | 0.2      | 0.2009    | 0.92   | 0.8096 | 1.045  |
| rs9934699 | 84509137      | G        | A        | 0.4616   | 0.4348   | 0.02742   | 1.126  | 1.013  | 1.252  |
| rs9934701 | 84509148      | G        | A        | 0.4616   | 0.4348   | 0.02665   | 1.127  | 1.014  | 1.253  |
| rs9936406 | 84476343      | G        | A        | 0.3232   | 0.3403   | 0.1325    | 0.9219 | 0.8293 | 1.025  |
| rs9937847 | 84475052      | A        | G        | 0.09797  | 0.1123   | 0.03819   | 0.8414 | 0.7146 | 0.9906 |
| rs9938002 | 84497364      | G        | A        | 0.07105  | 0.07532  | 0.6472    | 0.9552 | 0.785  | 1.162  |
| rs9940980 | 84496182      | C        | T        | 0.3014   | 0.2996   | 0.9566    | 1.003  | 0.8994 | 1.119  |

Table S4: IRF8—Imputed Data for Asians

| SNP        | Position (bp) | A2_major | A1_minor | MAF_case | MAF_ctrl | P       | OR     | L95    | U95    |
|------------|---------------|----------|----------|----------|----------|---------|--------|--------|--------|
| rs11861580 | 84456048      | C        | G        | 0.3109   | 0.3062   | 0.9037  | 1.007  | 0.9018 | 1.124  |
| rs16939834 | 84458109      | A        | C        | 0.1684   | 0.1651   | 0.3588  | 1.065  | 0.9308 | 1.219  |
| rs11864884 | 84458540      | A        | G        | 0.4787   | 0.4809   | 0.6993  | 0.9801 | 0.8851 | 1.085  |
| rs7185918  | 84458566      | G        | A        | 0.1604   | 0.1691   | 0.4569  | 0.9503 | 0.8308 | 1.087  |
| rs13330200 | 84458685      | A        | G        | 0.01933  | 0.01491  | 0.1147  | 1.368  | 0.9268 | 2.02   |
| rs12926601 | 84459167      | G        | A        | 0.2807   | 0.2755   | 0.9079  | 1.007  | 0.8983 | 1.128  |
| rs4843854  | 84460016      | G        | C        | 0.4941   | 0.5044   | 0.7165  | 0.9816 | 0.8877 | 1.085  |
| rs4843856  | 84460058      | A        | C        | 0.4777   | 0.4815   | 0.9475  | 1.003  | 0.9083 | 1.108  |
| rs12930347 | 84461177      | A        | G        | 0.3327   | 0.3601   | 0.06123 | 0.903  | 0.8116 | 1.005  |
| rs12935659 | 84463429      | A        | G        | 0.3365   | 0.3533   | 0.1667  | 0.9285 | 0.8358 | 1.031  |
| rs11648716 | 84464117      | A        | G        | 0.04882  | 0.05356  | 0.2391  | 0.872  | 0.6941 | 1.095  |
| rs8056522  | 84464397      | A        | G        | 0.2263   | 0.2364   | 0.4986  | 0.9601 | 0.8533 | 1.08   |
| rs9930043  | 84465079      | G        | C        | 0.2276   | 0.2454   | 0.042   | 0.8846 | 0.786  | 0.9956 |
| rs9932159  | 84470103      | G        | A        | 0.3174   | 0.3419   | 0.01356 | 0.8743 | 0.7859 | 0.9727 |
| rs2017161  | 84470594      | A        | C        | 0.3134   | 0.3382   | 0.01335 | 0.8739 | 0.7854 | 0.9724 |
| rs9925103  | 84472609      | C        | G        | 0.1157   | 0.1206   | 0.6434  | 0.964  | 0.8256 | 1.126  |
| rs9931862  | 84472878      | G        | A        | 0.165    | 0.1665   | 0.92    | 1.007  | 0.8788 | 1.154  |
| rs9931687  | 84473282      | G        | A        | 0.3637   | 0.3468   | 0.06885 | 1.103  | 0.9924 | 1.226  |
| rs6540231  | 84473561      | G        | C        | 0.333    | 0.3249   | 0.5325  | 1.034  | 0.9302 | 1.15   |
| rs8051122  | 84473919      | A        | G        | 0.04032  | 0.03376  | 0.1093  | 1.248  | 0.9516 | 1.638  |
| rs9937847  | 84475052      | A        | G        | 0.09797  | 0.1123   | 0.03819 | 0.8414 | 0.7146 | 0.9906 |
| rs16939874 | 84475246      | G        | A        | 0.05161  | 0.05247  | 0.9861  | 1.002  | 0.7972 | 1.26   |
| rs376783   | 84475324      | G        | A        | 0.2443   | 0.25     | 0.8528  | 0.9892 | 0.8823 | 1.109  |
| rs371800   | 84475621      | C        | A        | 0.28     | 0.2692   | 0.2443  | 1.07   | 0.955  | 1.198  |
| rs9936406  | 84476343      | G        | A        | 0.3232   | 0.3403   | 0.1325  | 0.9219 | 0.8293 | 1.025  |
| rs439390   | 84476707      | G        | A        | 0.4386   | 0.4374   | 0.9465  | 1.003  | 0.9067 | 1.111  |
| rs12325647 | 84476803      | A        | G        | 0.1488   | 0.1453   | 0.8571  | 1.013  | 0.8802 | 1.166  |
| rs11865366 | 84476840      | G        | A        | 0.01115  | 0.01273  | 0.5593  | 0.8716 | 0.5495 | 1.382  |
| rs9928868  | 84476971      | G        | C        | 0.1382   | 0.1271   | 0.1731  | 1.108  | 0.956  | 1.284  |
| rs384915   | 84477113      | G        | A        | 0.09422  | 0.09679  | 0.7639  | 1.027  | 0.864  | 1.22   |
| rs370703   | 84477981      | G        | A        | 0.4646   | 0.4862   | 0.2433  | 0.9426 | 0.8535 | 1.041  |
| rs395922   | 84478180      | G        | C        | 0.3103   | 0.2964   | 0.1519  | 1.086  | 0.9702 | 1.215  |
| rs7200739  | 84478427      | A        | G        | 0.06505  | 0.06108  | 0.3186  | 1.111  | 0.9033 | 1.367  |
| rs448136   | 84478848      | C        | A        | 0.2765   | 0.2714   | 0.8435  | 0.9887 | 0.8827 | 1.107  |
| rs11642286 | 84479110      | A        | G        | 0.01376  | 0.01242  | 0.5838  | 1.134  | 0.7236 | 1.776  |
| rs391821   | 84479528      | C        | A        | 0.08328  | 0.09702  | 0.243   | 0.8988 | 0.7514 | 1.075  |
| rs428530   | 84480360      | A        | G        | 0.1869   | 0.1748   | 0.04489 | 1.145  | 1.003  | 1.306  |
| rs11866609 | 84480582      | C        | G        | 0.2901   | 0.2684   | 0.0778  | 1.108  | 0.9887 | 1.241  |
| rs421710   | 84481015      | G        | C        | 0.3292   | 0.3216   | 0.966   | 0.9977 | 0.8967 | 1.11   |
| rs9308363  | 84481566      | A        | G        | 0.3725   | 0.3755   | 0.9295  | 0.9951 | 0.8926 | 1.109  |
| rs11860464 | 84482464      | A        | T        | 0.1633   | 0.1604   | 0.9767  | 1.002  | 0.8722 | 1.151  |
| rs7193803  | 84483174      | A        | C        | 0.3925   | 0.4102   | 0.261   | 0.9429 | 0.8511 | 1.045  |
| rs434216   | 84484514      | G        | A        | 0.1536   | 0.1678   | 0.05862 | 0.8706 | 0.7542 | 1.005  |
| rs896263   | 84485020      | C        | G        | 0.4583   | 0.4701   | 0.3253  | 0.95   | 0.8578 | 1.052  |
| rs403605   | 84485129      | G        | A        | 0.2171   | 0.2345   | 0.1834  | 0.9216 | 0.8173 | 1.039  |
| rs391023   | 84485315      | A        | G        | 0.2523   | 0.2647   | 0.1417  | 0.9159 | 0.8147 | 1.03   |
| rs375288   | 84485372      | A        | G        | 0.3494   | 0.3565   | 0.5944  | 0.9713 | 0.8725 | 1.081  |
| rs391855   | 84486122      | T        | A        | 0.2564   | 0.2645   | 0.3289  | 0.9442 | 0.8413 | 1.06   |
| rs383628   | 84486141      | G        | C        | 0.06923  | 0.07735  | 0.3591  | 0.9128 | 0.7511 | 1.109  |
| rs12149363 | 84486206      | C        | G        | 0.08625  | 0.09658  | 0.174   | 0.8859 | 0.744  | 1.055  |
| rs413529   | 84486520      | G        | A        | 0.06389  | 0.07099  | 0.3506  | 0.9082 | 0.742  | 1.112  |
| rs386098   | 84486701      | G        | A        | 0.4318   | 0.4456   | 0.3687  | 0.9544 | 0.8619 | 1.057  |
| rs369173   | 84486783      | C        | A        | 0.331    | 0.3273   | 0.8327  | 1.012  | 0.9083 | 1.127  |
| rs369597   | 84486935      | A        | G        | 0.4306   | 0.438    | 0.6521  | 0.9768 | 0.8821 | 1.082  |
| rs9924391  | 84487331      | C        | A        | 0.3308   | 0.3354   | 0.7154  | 0.9801 | 0.8799 | 1.092  |
| rs371391   | 84487395      | A        | G        | 0.4255   | 0.4303   | 0.7922  | 0.9862 | 0.8896 | 1.093  |
| rs388405   | 84487398      | G        | A        | 0.4308   | 0.4406   | 0.5374  | 0.9686 | 0.8751 | 1.072  |
| rs380458   | 84487686      | A        | G        | 0.04775  | 0.05371  | 0.3742  | 0.8991 | 0.711  | 1.137  |
| rs381139   | 84487901      | A        | G        | 0.4259   | 0.4317   | 0.7679  | 0.9846 | 0.8879 | 1.092  |
| rs28368112 | 84488458      | G        | C        | 0.1371   | 0.1251   | 0.2241  | 1.098  | 0.9446 | 1.275  |
| rs170033   | 84489005      | G        | A        | 0.4359   | 0.4517   | 0.3851  | 0.955  | 0.8609 | 1.06   |

| SNP        | Position (bp) | A2_major | A1_minor | MAF_case | MAF_ctrl | P        | OR     | L95    | U95    |
|------------|---------------|----------|----------|----------|----------|----------|--------|--------|--------|
| rs58574202 | 84489034      | C        | T        | 0.0593   | 0.05477  | 0.5546   | 1.068  | 0.8579 | 1.331  |
| 84489106   | 84489106      | A        | T        | 0.02376  | 0.01835  | 0.1516   | 1.308  | 0.9063 | 1.887  |
| rs4843859  | 84489457      | C        | G        | 0.03904  | 0.03746  | 0.8587   | 0.9769 | 0.7551 | 1.264  |
| rs8058349  | 84489530      | C        | G        | 0.1406   | 0.1523   | 0.3176   | 0.9294 | 0.8051 | 1.073  |
| rs191022   | 84489633      | C        | G        | 0.4561   | 0.4666   | 0.3754   | 0.9552 | 0.8632 | 1.057  |
| rs188602   | 84489852      | C        | T        | 0.3499   | 0.3706   | 0.2015   | 0.9335 | 0.8399 | 1.037  |
| rs422186   | 84489971      | G        | A        | 0.4329   | 0.4466   | 0.3355   | 0.9497 | 0.855  | 1.055  |
| rs2270501  | 84490489      | C        | T        | 0.03635  | 0.03506  | 0.9263   | 0.9876 | 0.7576 | 1.287  |
| rs305085   | 84490744      | G        | A        | 0.01948  | 0.02269  | 0.6558   | 0.9219 | 0.6447 | 1.318  |
| 84491140   | 84491140      | A        | T        | 0.02387  | 0.02115  | 0.273    | 1.211  | 0.86   | 1.705  |
| rs305084   | 84491669      | T        | C        | 0.01378  | 0.02101  | 0.01181  | 0.6033 | 0.4071 | 0.8941 |
| 84492643   | 84492643      | T        | G        | 0.01186  | 0.01719  | 0.04563  | 0.6358 | 0.4078 | 0.9912 |
| 84492921   | 84492921      | T        | G        | 0.0112   | 0.01697  | 0.02834  | 0.6143 | 0.3974 | 0.9496 |
| rs16939906 | 84493007      | C        | T        | 0.03816  | 0.03577  | 0.7938   | 1.036  | 0.7924 | 1.356  |
| rs16882    | 84493074      | T        | C        | 0.2543   | 0.2524   | 0.449    | 1.046  | 0.9304 | 1.177  |
| rs11649549 | 84493298      | T        | C        | 0.2505   | 0.2499   | 0.5317   | 1.038  | 0.9227 | 1.169  |
| rs305083   | 84493379      | A        | G        | 0.3883   | 0.3771   | 0.5794   | 1.031  | 0.9264 | 1.147  |
| rs12924316 | 84493764      | C        | T        | 0.04224  | 0.04503  | 0.427    | 0.9069 | 0.7125 | 1.154  |
| rs305082   | 84494479      | C        | T        | 0.4744   | 0.4814   | 0.3927   | 0.9564 | 0.8635 | 1.059  |
| rs11862450 | 84494534      | G        | C        | 0.02816  | 0.02376  | 0.1703   | 1.25   | 0.9087 | 1.718  |
| 84494602   | 84494602      | C        | T        | 0.03973  | 0.03598  | 0.4987   | 1.1    | 0.8349 | 1.449  |
| rs13330025 | 84495034      | A        | T        | 0.06673  | 0.06968  | 0.9563   | 0.9943 | 0.8117 | 1.218  |
| rs13330075 | 84495083      | A        | G        | 0.06702  | 0.07178  | 0.8085   | 0.9754 | 0.7974 | 1.193  |
| rs11865854 | 84495152      | C        | T        | 0.08741  | 0.09403  | 0.7566   | 0.9719 | 0.8116 | 1.164  |
| rs182511   | 84495157      | C        | G        | 0.09498  | 0.1027   | 0.2577   | 0.905  | 0.7614 | 1.076  |
| rs11642583 | 84496096      | T        | G        | 0.2248   | 0.2185   | 0.8127   | 1.015  | 0.9005 | 1.143  |
| rs9940980  | 84496182      | C        | T        | 0.3014   | 0.2996   | 0.9566   | 1.003  | 0.8994 | 1.119  |
| rs9926664  | 84496256      | A        | G        | 0.3      | 0.2973   | 0.8603   | 1.01   | 0.905  | 1.127  |
| 84496333   | 84496333      | C        | T        | 0.07199  | 0.0772   | 0.5764   | 0.946  | 0.7786 | 1.149  |
| 84497036   | 84497036      | A        | C        | 0.02536  | 0.0214   | 0.1964   | 1.247  | 0.8921 | 1.743  |
| rs3794661  | 84497167      | G        | A        | 0.0213   | 0.01888  | 0.1469   | 1.313  | 0.9088 | 1.896  |
| rs9938002  | 84497364      | G        | A        | 0.07105  | 0.07532  | 0.6472   | 0.9552 | 0.785  | 1.162  |
| 84497964   | 84497964      | C        | T        | 0.01492  | 0.008114 | 0.01952  | 1.8    | 1.099  | 2.949  |
| 84498106   | 84498106      | A        | C        | 0.04145  | 0.03628  | 0.3056   | 1.156  | 0.8759 | 1.526  |
| rs305081   | 84498831      | A        | C        | 0.04625  | 0.04843  | 0.8905   | 1.017  | 0.796  | 1.3    |
| rs305080   | 84499275      | T        | C        | 0.3768   | 0.3826   | 0.5801   | 0.9708 | 0.8742 | 1.078  |
| rs10514610 | 84499676      | G        | C        | 0.3107   | 0.3022   | 0.3602   | 1.053  | 0.9423 | 1.178  |
| rs16939917 | 84499921      | T        | A        | 0.3217   | 0.3045   | 0.1791   | 1.08   | 0.9653 | 1.208  |
| 84499982   | 84499982      | G        | A        | 0.01693  | 0.008718 | 0.007347 | 1.908  | 1.19   | 3.061  |
| rs305079   | 84499997      | T        | C        | 0.3377   | 0.3331   | 0.6497   | 1.025  | 0.9205 | 1.142  |
| rs305078   | 84500644      | A        | G        | 0.1956   | 0.2013   | 0.7908   | 0.983  | 0.8661 | 1.116  |
| rs172573   | 84500925      | A        | G        | 0.05803  | 0.06799  | 0.1426   | 0.8562 | 0.6958 | 1.054  |
| 84500960   | 84500960      | T        | G        | 0.0146   | 0.01607  | 0.5292   | 0.8728 | 0.5714 | 1.333  |
| rs305077   | 84500967      | C        | T        | 0.4038   | 0.3954   | 0.6874   | 1.021  | 0.9221 | 1.131  |
| rs16939930 | 84501600      | T        | A        | 0.05206  | 0.03876  | 0.02203  | 1.324  | 1.041  | 1.683  |
| rs440222   | 84501917      | C        | T        | 0.1343   | 0.1439   | 0.6999   | 0.9717 | 0.8397 | 1.124  |
| rs391525   | 84501940      | A        | G        | 0.3932   | 0.4039   | 0.6431   | 0.9759 | 0.8804 | 1.082  |
| rs366304   | 84502301      | G        | T        | 0.0946   | 0.1097   | 0.2249   | 0.9007 | 0.7608 | 1.066  |
| rs2292982  | 84502324      | G        | T        | 0.4141   | 0.4094   | 0.8134   | 1.012  | 0.9135 | 1.122  |
| rs2292980  | 84502577      | T        | C        | 0.4889   | 0.49     | 0.825    | 0.9885 | 0.8925 | 1.095  |
| rs16939941 | 84502705      | C        | T        | 0.05213  | 0.0387   | 0.02305  | 1.322  | 1.039  | 1.682  |
| rs1519976  | 84503176      | G        | T        | 0.4312   | 0.4241   | 0.397    | 1.046  | 0.9428 | 1.16   |
| 84503190   | 84503190      | C        | G        | 0.03179  | 0.03563  | 0.6407   | 0.9342 | 0.7021 | 1.243  |
| rs768410   | 84503229      | G        | T        | 0.4316   | 0.4247   | 0.4101   | 1.045  | 0.9416 | 1.159  |
| rs147968   | 84503340      | G        | A        | 0.3319   | 0.3202   | 0.3827   | 1.049  | 0.9424 | 1.167  |
| rs925994   | 84503518      | C        | A        | 0.1354   | 0.1275   | 0.178    | 1.11   | 0.9537 | 1.291  |
| rs12923978 | 84503825      | T        | C        | 0.3585   | 0.3581   | 0.984    | 0.9989 | 0.8946 | 1.115  |
| rs424971   | 84503951      | C        | T        | 0.2638   | 0.2634   | 0.8318   | 0.9875 | 0.8795 | 1.109  |
| rs11649318 | 84503982      | C        | G        | 0.4567   | 0.4551   | 0.8991   | 1.007  | 0.9078 | 1.116  |
| rs11863590 | 84503995      | A        | G        | 0.3518   | 0.3541   | 0.8705   | 0.9909 | 0.8877 | 1.106  |
| 84504395   | 84504395      | G        | A        | 0.03232  | 0.03513  | 0.7711   | 0.9582 | 0.7188 | 1.277  |

| SNP        | Position (bp) | A2_major | A1_minor | MAF_case | MAF_ctrl | P        | OR     | L95    | U95    |
|------------|---------------|----------|----------|----------|----------|----------|--------|--------|--------|
| 84504557   | 84504557      | C        | T        | 0.03138  | 0.03486  | 0.6754   | 0.9398 | 0.703  | 1.257  |
| rs8051462  | 84504828      | G        | A        | 0.4512   | 0.438    | 0.2592   | 1.061  | 0.9573 | 1.176  |
| 84504944   | 84504944      | A        | C        | 0.03378  | 0.02745  | 0.13     | 1.27   | 0.932  | 1.731  |
| 84505029   | 84505029      | G        | A        | 0.03197  | 0.03488  | 0.8021   | 0.9637 | 0.7218 | 1.287  |
| 84505413   | 84505413      | G        | A        | 0.03347  | 0.02994  | 0.3068   | 1.163  | 0.8709 | 1.552  |
| rs13331970 | 84505479      | G        | A        | 0.06667  | 0.08107  | 0.03973  | 0.8145 | 0.6699 | 0.9904 |
| 84505809   | 84505809      | C        | T        | 0.01474  | 0.01834  | 0.1756   | 0.7546 | 0.5022 | 1.134  |
| rs11649271 | 84505830      | T        | C        | 0.08654  | 0.08951  | 0.6816   | 0.963  | 0.8045 | 1.153  |
| 84505873   | 84505873      | C        | T        | 0.02907  | 0.03301  | 0.5581   | 0.9141 | 0.6768 | 1.235  |
| rs28366896 | 84505943      | G        | A        | 0.0687   | 0.07931  | 0.1254   | 0.8584 | 0.7061 | 1.043  |
| 84505978   | 84505978      | A        | C        | 0.135    | 0.1384   | 0.845    | 1.015  | 0.8719 | 1.182  |
| 84505981   | 84505981      | T        | A        | 0.135    | 0.1386   | 0.8523   | 1.015  | 0.8713 | 1.181  |
| rs73264969 | 84506515      | C        | G        | 0.07084  | 0.06282  | 0.1638   | 1.156  | 0.9428 | 1.416  |
| rs403038   | 84506572      | G        | A        | 0.04585  | 0.04832  | 0.5514   | 0.9275 | 0.7241 | 1.188  |
| rs409661   | 84506575      | G        | C        | 0.03445  | 0.03378  | 0.57     | 1.086  | 0.8178 | 1.441  |
| rs8059127  | 84506690      | G        | T        | 0.1286   | 0.1471   | 0.03089  | 0.85   | 0.7334 | 0.9852 |
| rs305071   | 84506772      | G        | A        | 0.2856   | 0.3096   | 0.0697   | 0.9034 | 0.8094 | 1.008  |
| rs28552575 | 84506805      | A        | T        | 0.1974   | 0.2128   | 0.2063   | 0.9219 | 0.8126 | 1.046  |
| rs305070   | 84506925      | A        | G        | 0.103    | 0.1137   | 0.1795   | 0.8951 | 0.7615 | 1.052  |
| rs9928776  | 84506960      | G        | T        | 0.2047   | 0.2185   | 0.2205   | 0.9248 | 0.8161 | 1.048  |
| rs16939967 | 84506974      | G        | T        | 0.0859   | 0.08315  | 0.8436   | 0.9821 | 0.8211 | 1.175  |
| rs305069   | 84507059      | C        | T        | 0.1749   | 0.1701   | 0.8635   | 1.012  | 0.8796 | 1.165  |
| 84507124   | 84507124      | A        | C        | 0.01722  | 0.009565 | 0.01459  | 1.787  | 1.122  | 2.848  |
| rs16939969 | 84507645      | T        | C        | 0.2074   | 0.2217   | 0.1989   | 0.9219 | 0.8143 | 1.044  |
| rs28631400 | 84507948      | C        | T        | 0.2056   | 0.2209   | 0.1699   | 0.9167 | 0.8097 | 1.038  |
| rs28407896 | 84507957      | C        | T        | 0.2056   | 0.2209   | 0.1699   | 0.9167 | 0.8097 | 1.038  |
| 84508158   | 84508158      | T        | A        | 0.02704  | 0.0248   | 0.3071   | 1.183  | 0.857  | 1.632  |
| rs11117415 | 84508187      | A        | G        | 0.2734   | 0.2703   | 0.8845   | 1.009  | 0.8993 | 1.131  |
| rs16939975 | 84508399      | A        | G        | 0.05567  | 0.04663  | 0.1328   | 1.199  | 0.9463 | 1.519  |
| rs4843860  | 84508422      | A        | G        | 0.1303   | 0.1337   | 0.4922   | 0.9489 | 0.8169 | 1.102  |
| rs4843861  | 84508477      | A        | T        | 0.3339   | 0.3529   | 0.08242  | 0.9098 | 0.8178 | 1.012  |
| rs9926067  | 84508696      | A        | G        | 0.2047   | 0.2154   | 0.3665   | 0.9438 | 0.8324 | 1.07   |
| rs12926854 | 84508759      | A        | G        | 0.1274   | 0.132    | 0.3643   | 0.9326 | 0.802  | 1.084  |
| rs9934699  | 84509137      | G        | A        | 0.4616   | 0.4348   | 0.02742  | 1.126  | 1.013  | 1.252  |
| rs9934701  | 84509148      | G        | A        | 0.4616   | 0.4348   | 0.02665  | 1.127  | 1.014  | 1.253  |
| rs9926411  | 84509158      | A        | G        | 0.3321   | 0.3065   | 0.02069  | 1.136  | 1.02   | 1.265  |
| rs8058904  | 84509183      | A        | G        | 0.03506  | 0.04227  | 0.1964   | 0.839  | 0.6428 | 1.095  |
| 84509238   | 84509238      | C        | T        | 0.01854  | 0.01028  | 0.005359 | 1.879  | 1.205  | 2.93   |
| rs9924484  | 84509239      | C        | G        | 0.463    | 0.4379   | 0.03266  | 1.122  | 1.01   | 1.247  |
| rs9924488  | 84509249      | C        | G        | 0.3193   | 0.3321   | 0.2927   | 0.9414 | 0.8412 | 1.053  |
| rs8064189  | 84509297      | T        | G        | 0.4855   | 0.4628   | 0.0393   | 1.113  | 1.005  | 1.232  |
| rs57770209 | 84509594      | C        | T        | 0.05697  | 0.05144  | 0.2336   | 1.146  | 0.916  | 1.433  |
| rs16939982 | 84510004      | A        | G        | 0.05676  | 0.0508   | 0.09154  | 1.215  | 0.969  | 1.524  |
| rs2280378  | 84510246      | G        | A        | 0.3363   | 0.337    | 0.9165   | 1.006  | 0.9035 | 1.12   |
| rs7185022  | 84510430      | C        | A        | 0.1034   | 0.1047   | 0.3911   | 0.9271 | 0.7797 | 1.102  |
| rs13338943 | 84510452      | G        | T        | 0.1412   | 0.1522   | 0.2084   | 0.9118 | 0.7897 | 1.053  |
| rs12929551 | 84510511      | C        | T        | 0.04388  | 0.04097  | 0.7867   | 1.035  | 0.8088 | 1.323  |
| rs59370928 | 84510611      | G        | A        | 0.05632  | 0.05072  | 0.1373   | 1.188  | 0.9466 | 1.49   |
| 84510613   | 84510613      | G        | T        | 0.1109   | 0.1138   | 0.5313   | 0.9483 | 0.8031 | 1.12   |
| rs16939994 | 84510669      | C        | G        | 0.04612  | 0.05348  | 0.03535  | 0.7796 | 0.6183 | 0.9831 |
| rs11866752 | 84510994      | G        | T        | 0.1777   | 0.1692   | 0.6123   | 1.035  | 0.9068 | 1.181  |
| rs16940005 | 84511183      | G        | C        | 0.04334  | 0.041    | 0.8285   | 1.028  | 0.8031 | 1.315  |
| rs16940007 | 84511788      | C        | T        | 0.05956  | 0.05794  | 0.5167   | 1.075  | 0.8638 | 1.338  |
| 84511805   | 84511805      | C        | T        | 0.08487  | 0.08515  | 0.5975   | 1.051  | 0.8737 | 1.264  |
| 84511839   | 84511839      | A        | C        | 0.04969  | 0.05347  | 0.5002   | 0.9219 | 0.7278 | 1.168  |
| rs16940009 | 84512089      | G        | C        | 0.1308   | 0.1299   | 0.8875   | 0.9893 | 0.852  | 1.149  |
| rs16940010 | 84512135      | C        | G        | 0.06964  | 0.06689  | 0.434    | 1.084  | 0.8856 | 1.327  |
| rs16940012 | 84512344      | A        | G        | 0.04539  | 0.03763  | 0.2083   | 1.177  | 0.9133 | 1.516  |
| 84512383   | 84512383      | C        | T        | 0.04662  | 0.03659  | 0.0962   | 1.241  | 0.9622 | 1.601  |
| rs10514611 | 84512743      | C        | T        | 0.2341   | 0.2438   | 0.9575   | 0.9967 | 0.8834 | 1.125  |
| 84513118   | 84513118      | A        | C        | 0.0211   | 0.02314  | 0.793    | 0.9526 | 0.6629 | 1.369  |

| SNP        | Position (bp) | A2_major | A1_minor | MAF_case | MAF_ctrl | P       | OR     | L95    | U95    |
|------------|---------------|----------|----------|----------|----------|---------|--------|--------|--------|
| rs305072   | 84513164      | A        | G        | 0.09311  | 0.09181  | 0.3509  | 1.088  | 0.9116 | 1.298  |
| rs1044873  | 84513172      | G        | A        | 0.465    | 0.4549   | 0.4078  | 1.044  | 0.9425 | 1.157  |
| 84513759   | 84513759      | A        | C        | 0.02209  | 0.02375  | 0.8566  | 0.9675 | 0.6764 | 1.384  |
| rs11646027 | 84513898      | T        | C        | 0.2439   | 0.2474   | 0.6315  | 1.03   | 0.9122 | 1.163  |
| rs59865900 | 84514317      | G        | A        | 0.06413  | 0.05922  | 0.2799  | 1.124  | 0.9096 | 1.388  |
| 84514732   | 84514732      | A        | C        | 0.02101  | 0.02295  | 0.7814  | 0.9503 | 0.6632 | 1.362  |
| rs1021479  | 84514915      | T        | C        | 0.1088   | 0.09679  | 0.06182 | 1.172  | 0.9922 | 1.384  |
| 84515002   | 84515002      | C        | T        | 0.06564  | 0.05994  | 0.2166  | 1.142  | 0.9252 | 1.409  |
| rs16940020 | 84515007      | G        | A        | 0.06299  | 0.05635  | 0.519   | 1.072  | 0.8675 | 1.325  |
| rs305073   | 84515294      | T        | C        | 0.4354   | 0.4398   | 0.3859  | 0.9555 | 0.8621 | 1.059  |
| rs305074   | 84515321      | C        | T        | 0.4224   | 0.4335   | 0.1989  | 0.9343 | 0.8422 | 1.036  |
| 84515682   | 84515682      | A        | G        | 0.0382   | 0.03129  | 0.2042  | 1.198  | 0.9063 | 1.584  |
| 84515779   | 84515779      | A        | C        | 0.0225   | 0.02232  | 0.7888  | 1.05   | 0.7342 | 1.502  |
| rs11117416 | 84515825      | C        | G        | 0.1701   | 0.1831   | 0.5294  | 0.9578 | 0.8372 | 1.096  |
| 84515848   | 84515848      | A        | C        | 0.02101  | 0.02295  | 0.779   | 0.9498 | 0.6628 | 1.361  |
| 84515863   | 84515863      | A        | C        | 0.02139  | 0.02297  | 0.8462  | 0.9652 | 0.6746 | 1.381  |
| 84515870   | 84515870      | A        | C        | 0.02104  | 0.02301  | 0.7817  | 0.9504 | 0.6631 | 1.362  |
| rs16940023 | 84516215      | C        | T        | 0.1517   | 0.1324   | 0.02213 | 1.183  | 1.024  | 1.366  |
| rs8052521  | 84516230      | C        | T        | 0.4439   | 0.4375   | 0.1921  | 1.071  | 0.9661 | 1.187  |
| 84516377   | 84516377      | A        | C        | 0.02172  | 0.02281  | 0.9701  | 1.007  | 0.7027 | 1.443  |
| rs1021480  | 84516471      | A        | G        | 0.4477   | 0.4379   | 0.1174  | 1.086  | 0.9794 | 1.205  |
| rs1021481  | 84516521      | G        | A        | 0.4469   | 0.4401   | 0.1942  | 1.071  | 0.9659 | 1.187  |
| rs880364   | 84516666      | G        | A        | 0.4934   | 0.4986   | 0.4083  | 0.9576 | 0.8641 | 1.061  |
| rs880365   | 84516863      | C        | T        | 0.4905   | 0.4831   | 0.2717  | 1.059  | 0.9558 | 1.174  |
| rs880366   | 84516939      | C        | T        | 0.4738   | 0.4754   | 0.7179  | 0.9812 | 0.885  | 1.088  |
| rs305075   | 84517136      | G        | T        | 0.2098   | 0.2232   | 0.09983 | 0.9016 | 0.797  | 1.02   |
| 84517309   | 84517309      | A        | C        | 0.008054 | 0.01266  | 0.01694 | 0.5378 | 0.3233 | 0.8948 |
| rs73266812 | 84517410      | A        | T        | 0.1092   | 0.1122   | 0.7277  | 1.03   | 0.8714 | 1.218  |
| rs7206172  | 84517721      | G        | A        | 0.008847 | 0.01247  | 0.04171 | 0.6006 | 0.3677 | 0.981  |
| rs11644411 | 84517732      | G        | C        | 0.3143   | 0.3213   | 0.8639  | 0.9903 | 0.886  | 1.107  |
| 84518037   | 84518037      | A        | C        | 0.01735  | 0.00981  | 0.01437 | 1.81   | 1.126  | 2.911  |
| rs1472235  | 84518468      | G        | A        | 0.2773   | 0.2736   | 0.2929  | 1.064  | 0.9481 | 1.193  |
| rs7199277  | 84518551      | T        | G        | 0.04448  | 0.04426  | 0.7392  | 1.043  | 0.8124 | 1.34   |
| rs17444745 | 84519063      | G        | A        | 0.03504  | 0.03702  | 0.4495  | 0.9002 | 0.6855 | 1.182  |
| 84519589   | 84519589      | G        | A        | 0.0137   | 0.007295 | 0.0172  | 1.935  | 1.124  | 3.33   |
| 84520866   | 84520866      | G        | A        | 0.0102   | 0.01343  | 0.1295  | 0.6876 | 0.4236 | 1.116  |
| 84521073   | 84521073      | G        | A        | 0.02835  | 0.03107  | 0.4035  | 0.879  | 0.6496 | 1.19   |
| rs12598785 | 84521809      | A        | G        | 0.2231   | 0.2293   | 0.2527  | 0.9318 | 0.8255 | 1.052  |
| rs60218704 | 84521854      | T        | C        | 0.1147   | 0.1192   | 0.5108  | 0.9463 | 0.8028 | 1.116  |
| rs8045988  | 84521891      | G        | A        | 0.02063  | 0.01712  | 0.4044  | 1.168  | 0.8108 | 1.682  |
| rs366078   | 84522064      | T        | C        | 0.1271   | 0.1244   | 0.5904  | 1.043  | 0.8939 | 1.218  |
| 84522279   | 84522279      | G        | A        | 0.03976  | 0.03244  | 0.2169  | 1.189  | 0.9035 | 1.564  |
| rs2172625  | 84522286      | T        | C        | 0.124    | 0.1213   | 0.6325  | 1.039  | 0.8877 | 1.216  |
| rs2970093  | 84522329      | C        | T        | 0.1272   | 0.126    | 0.6623  | 1.035  | 0.8874 | 1.207  |
| rs399280   | 84522499      | C        | G        | 0.1288   | 0.1281   | 0.7188  | 1.029  | 0.8817 | 1.2    |
| rs383425   | 84522540      | C        | T        | 0.4744   | 0.4826   | 0.6788  | 0.9783 | 0.8819 | 1.085  |
| rs2970092  | 84522649      | G        | A        | 0.04289  | 0.04252  | 0.7174  | 1.047  | 0.8159 | 1.344  |
| rs523642   | 84523096      | G        | A        | 0.1265   | 0.1249   | 0.6539  | 1.036  | 0.8878 | 1.209  |
| 84523106   | 84523106      | A        | C        | 0.02092  | 0.01812  | 0.7174  | 1.069  | 0.7435 | 1.538  |
| rs524432   | 84523155      | T        | C        | 0.1267   | 0.1253   | 0.6791  | 1.033  | 0.8855 | 1.205  |
| rs388988   | 84523302      | G        | T        | 0.1268   | 0.1259   | 0.7012  | 1.031  | 0.8834 | 1.202  |
| 84523433   | 84523433      | A        | C        | 0.1664   | 0.1595   | 0.4485  | 1.055  | 0.9187 | 1.211  |
| rs411221   | 84523460      | G        | C        | 0.1636   | 0.1566   | 0.4184  | 1.059  | 0.9215 | 1.218  |
| 84523564   | 84523564      | G        | A        | 0.03774  | 0.03533  | 0.9366  | 1.011  | 0.7729 | 1.322  |
| rs878453   | 84523664      | T        | C        | 0.2951   | 0.2985   | 0.6892  | 0.9773 | 0.8735 | 1.093  |
| rs878454   | 84523673      | G        | A        | 0.05767  | 0.05158  | 0.2847  | 1.132  | 0.9023 | 1.419  |
| rs903201   | 84523785      | T        | C        | 0.213    | 0.2246   | 0.2655  | 0.9308 | 0.8204 | 1.056  |
| rs11861479 | 84523794      | T        | G        | 0.2127   | 0.2246   | 0.2541  | 0.9292 | 0.819  | 1.054  |
| rs58980382 | 84523934      | C        | T        | 0.09555  | 0.09714  | 0.7931  | 0.9771 | 0.8218 | 1.162  |
| rs11860480 | 84523959      | A        | C        | 0.3164   | 0.3304   | 0.2365  | 0.9362 | 0.8394 | 1.044  |
| rs11860517 | 84524000      | A        | G        | 0.2228   | 0.2316   | 0.3615  | 0.9445 | 0.8355 | 1.068  |



| SNP        | Position (bp) | A2_major | A1_minor | MAF_case | MAF_ctrl | P         | OR     | L95    | U95    |
|------------|---------------|----------|----------|----------|----------|-----------|--------|--------|--------|
| rs11117418 | 84524028      | T        | G        | 0.2172   | 0.2265   | 0.4182    | 0.9505 | 0.8405 | 1.075  |
| rs12051539 | 84524038      | G        | C        | 0.1387   | 0.1487   | 0.4619    | 0.947  | 0.8192 | 1.095  |
| rs13332649 | 84524184      | A        | G        | 0.0839   | 0.08434  | 0.8008    | 0.9764 | 0.8113 | 1.175  |
| rs875529   | 84524187      | G        | C        | 0.2207   | 0.2317   | 0.3619    | 0.9448 | 0.8362 | 1.067  |
| rs875527   | 84524231      | G        | A        | 0.151    | 0.1626   | 0.4283    | 0.9451 | 0.8218 | 1.087  |
| rs419030   | 84524302      | A        | G        | 0.4123   | 0.4498   | 0.0007103 | 0.8362 | 0.754  | 0.9275 |
| rs12596341 | 84524541      | C        | A        | 0.01606  | 0.02187  | 0.06415   | 0.701  | 0.4813 | 1.021  |
| 84524648   | 84524648      | G        | A        | 0.03197  | 0.02781  | 0.4639    | 1.118  | 0.8299 | 1.505  |
| 84524665   | 84524665      | C        | A        | 0.3823   | 0.4128   | 0.005096  | 0.8623 | 0.7774 | 0.9565 |
| 84524668   | 84524668      | C        | A        | 0.3795   | 0.4098   | 0.006223  | 0.8645 | 0.7789 | 0.9596 |
| 84524720   | 84524720      | C        | A        | 0.0889   | 0.1097   | 0.001085  | 0.7537 | 0.6361 | 0.893  |
| rs73266822 | 84524751      | G        | A        | 0.03342  | 0.0317   | 0.6163    | 1.076  | 0.8077 | 1.434  |
| rs12444221 | 84524786      | C        | T        | 0.09651  | 0.09806  | 0.6459    | 0.9605 | 0.8086 | 1.141  |
| rs437291   | 84525009      | C        | T        | 0.2135   | 0.2404   | 0.002561  | 0.8296 | 0.7348 | 0.9367 |
| 84525116   | 84525116      | C        | T        | 0.009929 | 0.01081  | 0.5265    | 0.8465 | 0.5054 | 1.418  |
| rs447632   | 84525141      | G        | A        | 0.4086   | 0.4425   | 0.003832  | 0.8602 | 0.7768 | 0.9526 |
| rs34337659 | 84525158      | C        | T        | 0.4364   | 0.4775   | 0.0003973 | 0.8303 | 0.749  | 0.9203 |
| rs66509440 | 84525182      | T        | C        | 0.4364   | 0.4775   | 0.0003973 | 0.8303 | 0.749  | 0.9203 |
| rs66804793 | 84525190      | A        | G        | 0.4364   | 0.4778   | 0.0003839 | 0.8298 | 0.7487 | 0.9198 |
| rs9925859  | 84525223      | G        | C        | 0.08884  | 0.1097   | 0.000951  | 0.7514 | 0.6343 | 0.8902 |
| rs9929895  | 84525236      | T        | A        | 0.4302   | 0.4707   | 0.0007171 | 0.8352 | 0.7525 | 0.927  |
| rs74032085 | 84525245      | C        | T        | 0.4364   | 0.4772   | 0.0004724 | 0.8321 | 0.7507 | 0.9224 |
| rs16940044 | 84525266      | G        | A        | 0.4364   | 0.4772   | 0.0004732 | 0.8322 | 0.7507 | 0.9225 |
| rs73266828 | 84525329      | A        | G        | 0.03377  | 0.03171  | 0.5704    | 1.086  | 0.8159 | 1.447  |
| rs2934497  | 84525379      | T        | C        | 0.4367   | 0.4772   | 0.0005118 | 0.8331 | 0.7515 | 0.9235 |
| rs2970091  | 84525387      | A        | G        | 0.4368   | 0.4772   | 0.0005314 | 0.8336 | 0.752  | 0.924  |
| rs2970090  | 84525392      | A        | G        | 0.2141   | 0.2397   | 0.003978  | 0.8367 | 0.741  | 0.9446 |
| rs56239618 | 84525421      | A        | G        | 0.01668  | 0.01485  | 0.7665    | 1.062  | 0.7139 | 1.58   |
| rs2934498  | 84525783      | G        | A        | 0.4367   | 0.4776   | 0.0004088 | 0.8305 | 0.7492 | 0.9206 |
| 84525893   | 84525893      | G        | A        | 0.03259  | 0.03224  | 0.9921    | 0.9986 | 0.7512 | 1.327  |
| rs447919   | 84526058      | C        | T        | 0.09046  | 0.1119   | 0.0007977 | 0.7501 | 0.634  | 0.8874 |
| rs439885   | 84526175      | A        | G        | 0.4351   | 0.4751   | 0.000582  | 0.8349 | 0.7533 | 0.9253 |
| rs450443   | 84526392      | G        | T        | 0.4026   | 0.4486   | 0.0001407 | 0.8178 | 0.7374 | 0.9071 |
| rs396987   | 84526435      | G        | A        | 0.4347   | 0.475    | 0.0005438 | 0.8341 | 0.7526 | 0.9244 |
| rs385989   | 84526509      | G        | T        | 0.2151   | 0.2397   | 0.004842  | 0.8403 | 0.7445 | 0.9484 |
| rs4843865  | 84526806      | T        | A        | 0.127    | 0.1303   | 0.6675    | 0.9674 | 0.8317 | 1.125  |
| 84527141   | 84527141      | A        | C        | 0.1251   | 0.1296   | 0.5725    | 0.9572 | 0.8224 | 1.114  |
| rs8052690  | 84527239      | A        | G        | 0.1496   | 0.152    | 0.6618    | 0.9691 | 0.8421 | 1.115  |
| rs2934499  | 84527604      | C        | T        | 0.07855  | 0.09756  | 0.003049  | 0.7591 | 0.6326 | 0.9109 |
| rs8059144  | 84527977      | T        | C        | 0.2742   | 0.2954   | 0.1198    | 0.9098 | 0.8075 | 1.025  |
| rs8045825  | 84527979      | C        | G        | 0.2744   | 0.2954   | 0.1229    | 0.9105 | 0.8082 | 1.026  |
| 84528054   | 84528054      | T        | C        | 0.03163  | 0.03286  | 0.6542    | 0.9353 | 0.698  | 1.253  |
| rs4843866  | 84528151      | C        | T        | 0.2747   | 0.2956   | 0.1269    | 0.9114 | 0.809  | 1.027  |
| rs186249   | 84528397      | G        | C        | 0.2983   | 0.2696   | 0.01661   | 1.148  | 1.025  | 1.286  |
| 84528467   | 84528467      | C        | G        | 0.02133  | 0.01883  | 0.8174    | 1.043  | 0.7301 | 1.49   |
| rs12149636 | 84528721      | C        | G        | 0.2959   | 0.3206   | 0.05682   | 0.8978 | 0.8035 | 1.003  |
| rs12149642 | 84528922      | C        | T        | 0.2901   | 0.3157   | 0.05999   | 0.8985 | 0.8036 | 1.005  |
| 84529195   | 84529195      | C        | T        | 0.02131  | 0.01858  | 0.7545    | 1.059  | 0.7402 | 1.514  |
| rs305067   | 84529341      | G        | C        | 0.07796  | 0.09248  | 0.01417   | 0.7945 | 0.661  | 0.9548 |
| rs11117419 | 84529383      | C        | G        | 0.2904   | 0.3159   | 0.06195   | 0.8993 | 0.8045 | 1.005  |
| rs11117420 | 84529423      | G        | C        | 0.1925   | 0.1934   | 0.6891    | 0.9739 | 0.8553 | 1.109  |
| rs11117421 | 84529461      | G        | A        | 0.2905   | 0.3157   | 0.06713   | 0.9012 | 0.8063 | 1.007  |
| rs11117422 | 84529514      | G        | C        | 0.1251   | 0.1283   | 0.6799    | 0.9683 | 0.8309 | 1.128  |
| rs11117423 | 84529682      | T        | C        | 0.2908   | 0.316    | 0.0653    | 0.9006 | 0.8058 | 1.007  |
| rs11117424 | 84529738      | A        | G        | 0.2908   | 0.316    | 0.0653    | 0.9006 | 0.8058 | 1.007  |
| rs11117425 | 84529772      | C        | T        | 0.2908   | 0.3158   | 0.06452   | 0.9003 | 0.8055 | 1.006  |
| rs11648012 | 84529908      | C        | T        | 0.2913   | 0.3163   | 0.06643   | 0.9009 | 0.8059 | 1.007  |
| 84530056   | 84530056      | G        | T        | 0.02102  | 0.01834  | 0.7497    | 1.06   | 0.7394 | 1.521  |
| rs11643999 | 84530070      | G        | A        | 0.2927   | 0.3175   | 0.065     | 0.9007 | 0.8061 | 1.007  |
| rs11648084 | 84530099      | C        | T        | 0.2927   | 0.317    | 0.06469   | 0.9006 | 0.8059 | 1.006  |
| rs11644034 | 84530113      | G        | A        | 0.1246   | 0.129    | 0.5134    | 0.9502 | 0.8153 | 1.107  |

| SNP        | Position (bp) | A2_major | A1_minor | MAF_case | MAF_ctrl | P        | OR     | L95    | U95    |
|------------|---------------|----------|----------|----------|----------|----------|--------|--------|--------|
| rs16940083 | 84530130      | C        | T        | 0.222    | 0.2164   | 0.2431   | 1.078  | 0.9505 | 1.222  |
| rs13335265 | 84530311      | G        | C        | 0.08899  | 0.09455  | 0.2879   | 0.9068 | 0.7572 | 1.086  |
| rs8062669  | 84530493      | C        | T        | 0.2395   | 0.2374   | 0.5535   | 1.037  | 0.9197 | 1.169  |
| rs12711490 | 84530529      | T        | C        | 0.09201  | 0.0953   | 0.453    | 0.9349 | 0.7842 | 1.115  |
| rs12598434 | 84530560      | G        | T        | 0.2923   | 0.3164   | 0.06936  | 0.9023 | 0.8075 | 1.008  |
| rs11641153 | 84530641      | A        | G        | 0.08837  | 0.09136  | 0.4849   | 0.938  | 0.7839 | 1.122  |
| rs7205434  | 84530696      | C        | G        | 0.08837  | 0.09136  | 0.4849   | 0.938  | 0.7839 | 1.122  |
| rs8050476  | 84530705      | A        | G        | 0.2474   | 0.245    | 0.5018   | 1.041  | 0.925  | 1.173  |
| rs4843868  | 84530902      | C        | T        | 0.1221   | 0.1251   | 0.5818   | 0.9575 | 0.8203 | 1.118  |
| rs1879213  | 84530977      | C        | T        | 0.1662   | 0.1891   | 0.05376  | 0.8762 | 0.766  | 1.002  |
| rs56250418 | 84530999      | G        | T        | 0.01669  | 0.01543  | 0.8784   | 1.031  | 0.6953 | 1.529  |
| 84531120   | 84531120      | C        | A        | 0.01385  | 0.01729  | 0.295    | 0.805  | 0.5365 | 1.208  |
| 84531157   | 84531157      | C        | T        | 0.03666  | 0.03532  | 0.922    | 0.9867 | 0.7547 | 1.29   |
| rs73266846 | 84531335      | A        | T        | 0.1444   | 0.1363   | 0.5233   | 1.05   | 0.9047 | 1.218  |
| rs305065   | 84531367      | C        | G        | 0.07279  | 0.08696  | 0.01305  | 0.7905 | 0.6565 | 0.9517 |
| rs305064   | 84531643      | G        | A        | 0.0742   | 0.0885   | 0.01178  | 0.7894 | 0.6568 | 0.9489 |
| rs9927123  | 84531682      | G        | A        | 0.5092   | 0.4878   | 0.06333  | 1.102  | 0.9946 | 1.222  |
| rs16940087 | 84531752      | C        | T        | 0.1999   | 0.1907   | 0.09274  | 1.118  | 0.9817 | 1.273  |
| rs16940088 | 84531870      | C        | T        | 0.1668   | 0.1912   | 0.03709  | 0.867  | 0.7581 | 0.9915 |
| rs13330932 | 84532008      | C        | T        | 0.2236   | 0.227    | 0.5393   | 0.9622 | 0.8509 | 1.088  |
| 84532153   | 84532153      | G        | A        | 0.0363   | 0.03532  | 0.8585   | 0.9759 | 0.7461 | 1.276  |
| 84532251   | 84532251      | C        | A        | 0.05191  | 0.06114  | 0.2422   | 0.8746 | 0.6987 | 1.095  |
| rs56834409 | 84532277      | A        | G        | 0.1676   | 0.1912   | 0.04511  | 0.8719 | 0.7624 | 0.997  |
| rs4843869  | 84532642      | G        | A        | 0.08822  | 0.09159  | 0.4187   | 0.9287 | 0.7762 | 1.111  |
| 84532751   | 84532751      | C        | A        | 0.05191  | 0.06111  | 0.2443   | 0.8751 | 0.6991 | 1.095  |
| 84532869   | 84532869      | C        | T        | 0.03441  | 0.03422  | 0.7791   | 0.9615 | 0.731  | 1.265  |
| rs305061   | 84533160      | T        | C        | 0.1526   | 0.1594   | 0.1476   | 0.9024 | 0.7853 | 1.037  |
| rs305060   | 84533417      | C        | T        | 0.1615   | 0.177    | 0.02917  | 0.8607 | 0.7522 | 0.9849 |
| rs16940099 | 84533441      | T        | C        | 0.009855 | 0.0139   | 0.1324   | 0.7009 | 0.4413 | 1.113  |
| rs16940100 | 84533460      | C        | T        | 0.01283  | 0.01505  | 0.3773   | 0.8263 | 0.5409 | 1.262  |
| rs305059   | 84533519      | A        | G        | 0.1629   | 0.1784   | 0.02697  | 0.8589 | 0.7506 | 0.9828 |
| 84533672   | 84533672      | C        | T        | 0.01283  | 0.01505  | 0.3773   | 0.8263 | 0.5409 | 1.262  |
| 84533804   | 84533804      | T        | C        | 0.01283  | 0.01505  | 0.3773   | 0.8263 | 0.5409 | 1.262  |
| 84534005   | 84534005      | G        | C        | 0.04136  | 0.03171  | 0.01947  | 1.396  | 1.055  | 1.847  |
| rs7202472  | 84535003      | G        | T        | 0.08596  | 0.08949  | 0.3965   | 0.9248 | 0.7719 | 1.108  |
| 84535351   | 84535351      | A        | T        | 0.04221  | 0.0367   | 0.3851   | 1.123  | 0.864  | 1.461  |
| 84535387   | 84535387      | C        | T        | 0.04221  | 0.0367   | 0.3851   | 1.123  | 0.864  | 1.461  |
| rs305097   | 84535412      | G        | A        | 0.4844   | 0.4532   | 0.002259 | 1.174  | 1.059  | 1.302  |
| rs305096   | 84535433      | C        | T        | 0.04967  | 0.04535  | 0.2286   | 1.16   | 0.9109 | 1.478  |
| rs62051024 | 84535456      | A        | C        | 0.05409  | 0.04374  | 0.03775  | 1.291  | 1.015  | 1.642  |
| rs305095   | 84535500      | C        | T        | 0.4964   | 0.4653   | 0.002335 | 1.167  | 1.057  | 1.29   |
| 84535501   | 84535501      | C        | T        | 0.03663  | 0.03547  | 0.7184   | 1.052  | 0.7984 | 1.386  |
| rs305094   | 84535606      | T        | C        | 0.1651   | 0.1712   | 0.1414   | 0.9033 | 0.7889 | 1.034  |
| rs16940101 | 84535626      | A        | G        | 0.0275   | 0.03151  | 0.2013   | 0.8244 | 0.6131 | 1.109  |
| rs16940103 | 84535710      | G        | T        | 0.01901  | 0.02667  | 0.06562  | 0.7203 | 0.508  | 1.021  |
| rs16940104 | 84535711      | G        | T        | 0.02404  | 0.02809  | 0.21     | 0.8175 | 0.5967 | 1.12   |
| rs7190319  | 84536046      | A        | G        | 0.2241   | 0.2443   | 0.1136   | 0.9071 | 0.804  | 1.024  |
| rs305093   | 84536086      | C        | T        | 0.09754  | 0.1098   | 0.03853  | 0.8406 | 0.7131 | 0.9909 |
| rs11639990 | 84536305      | G        | C        | 0.2238   | 0.2421   | 0.1805   | 0.9206 | 0.8157 | 1.039  |
| rs305092   | 84536618      | G        | A        | 0.1537   | 0.1675   | 0.02396  | 0.854  | 0.7447 | 0.9794 |
| rs305091   | 84536744      | G        | A        | 0.1078   | 0.1203   | 0.02981  | 0.8395 | 0.7169 | 0.983  |
| rs305090   | 84536847      | C        | T        | 0.1928   | 0.2047   | 0.03678  | 0.8731 | 0.7687 | 0.9917 |
| 84536862   | 84536862      | G        | A        | 0.04134  | 0.04599  | 0.329    | 0.8834 | 0.6888 | 1.133  |
| rs16940110 | 84537074      | T        | C        | 0.02353  | 0.02179  | 0.5638   | 1.109  | 0.7813 | 1.573  |
| 84537377   | 84537377      | G        | A        | 0.04521  | 0.04157  | 0.742    | 1.043  | 0.8103 | 1.344  |
| 84537750   | 84537750      | C        | A        | 0.03717  | 0.03587  | 0.6271   | 1.07   | 0.8136 | 1.408  |
| rs965773   | 84537847      | A        | C        | 0.3887   | 0.4171   | 0.005254 | 0.862  | 0.7766 | 0.9567 |
| rs731709   | 84538088      | T        | C        | 0.1655   | 0.1527   | 0.1176   | 1.117  | 0.9725 | 1.283  |
| rs731707   | 84538469      | C        | T        | 0.3475   | 0.3785   | 0.003592 | 0.854  | 0.7679 | 0.9497 |
| rs305089   | 84538531      | C        | T        | 0.09856  | 0.1126   | 0.01646  | 0.8196 | 0.6966 | 0.9643 |
| rs305088   | 84539102      | C        | T        | 0.08918  | 0.1032   | 0.02869  | 0.8243 | 0.6933 | 0.9801 |

| SNP        | Position (bp) | A2_major | A1_minor | MAF_case | MAF_ctrl | P        | OR     | L95    | U95    |
|------------|---------------|----------|----------|----------|----------|----------|--------|--------|--------|
| rs305086   | 84540022      | G        | A        | 0.3657   | 0.3496   | 0.1822   | 1.074  | 0.9672 | 1.192  |
| rs6540234  | 84540557      | C        | T        | 0.06894  | 0.08134  | 0.02755  | 0.8056 | 0.6647 | 0.9764 |
| 84541385   | 84541385      | C        | A        | 0.05253  | 0.0532   | 0.4831   | 1.086  | 0.8627 | 1.367  |
| rs8047292  | 84541556      | T        | A        | 0.03604  | 0.04807  | 0.006719 | 0.7058 | 0.5486 | 0.908  |
| rs908988   | 84542101      | A        | G        | 0.3073   | 0.3146   | 0.3009   | 0.9456 | 0.8504 | 1.051  |
| rs8060078  | 84542153      | G        | T        | 0.1769   | 0.1677   | 0.1328   | 1.109  | 0.9692 | 1.268  |
| 84542243   | 84542243      | C        | T        | 0.01951  | 0.01893  | 0.8213   | 1.045  | 0.7156 | 1.525  |
| 84542469   | 84542469      | C        | A        | 0.02741  | 0.0244   | 0.3337   | 1.173  | 0.8485 | 1.622  |
| rs908985   | 84542503      | C        | T        | 0.3353   | 0.3528   | 0.2309   | 0.9375 | 0.8437 | 1.042  |
| rs908984   | 84542530      | A        | T        | 0.2737   | 0.2896   | 0.1246   | 0.918  | 0.8231 | 1.024  |
| rs57670691 | 84542583      | G        | A        | 0.08223  | 0.08282  | 0.9902   | 1.001  | 0.8366 | 1.198  |
| rs57396687 | 84542701      | G        | A        | 0.08223  | 0.08282  | 0.9899   | 1.001  | 0.8366 | 1.198  |
| 84542720   | 84542720      | A        | C        | 0.06008  | 0.06156  | 0.5566   | 1.066  | 0.8611 | 1.32   |
| 84542848   | 84542848      | T        | C        | 0.02419  | 0.02372  | 0.7814   | 1.049  | 0.75   | 1.466  |
| rs1915034  | 84542858      | G        | A        | 0.2031   | 0.2187   | 0.07443  | 0.8943 | 0.7911 | 1.011  |
| rs4240807  | 84542862      | C        | A        | 0.191    | 0.2052   | 0.1012   | 0.901  | 0.7955 | 1.021  |
| rs1915033  | 84542932      | C        | T        | 0.3419   | 0.3576   | 0.2536   | 0.941  | 0.8476 | 1.045  |
| rs4843871  | 84543036      | A        | G        | 0.3411   | 0.3573   | 0.24     | 0.9392 | 0.846  | 1.043  |
| rs4843872  | 84543172      | G        | A        | 0.2842   | 0.2978   | 0.1806   | 0.9276 | 0.8309 | 1.035  |
| 84543177   | 84543177      | C        | T        | 0.01883  | 0.01864  | 0.9516   | 0.9883 | 0.675  | 1.447  |
| rs59479659 | 84543225      | T        | G        | 0.1302   | 0.1299   | 0.8412   | 0.9845 | 0.8451 | 1.147  |
| 84543380   | 84543380      | C        | G        | 0.06154  | 0.06407  | 0.7756   | 1.031  | 0.8364 | 1.27   |
| rs58073431 | 84543416      | G        | C        | 0.2614   | 0.2558   | 0.4833   | 1.044  | 0.9249 | 1.179  |
| rs59821663 | 84543420      | G        | A        | 0.08222  | 0.08338  | 0.8912   | 0.9875 | 0.8252 | 1.182  |
| rs59403904 | 84543458      | C        | T        | 0.1518   | 0.1507   | 0.5775   | 1.041  | 0.9032 | 1.2    |
| rs58189590 | 84543560      | G        | A        | 0.1497   | 0.1497   | 0.6482   | 1.033  | 0.8973 | 1.19   |
| rs57426547 | 84543596      | C        | T        | 0.1494   | 0.1497   | 0.6655   | 1.032  | 0.8957 | 1.188  |
| 84544270   | 84544270      | C        | T        | 0.02679  | 0.02735  | 0.6297   | 0.9245 | 0.6719 | 1.272  |
| rs73268908 | 84544290      | C        | A        | 0.1494   | 0.1498   | 0.6861   | 1.03   | 0.8939 | 1.186  |
| rs73268912 | 84544401      | C        | A        | 0.08222  | 0.08291  | 0.9341   | 0.9924 | 0.829  | 1.188  |
| rs7204443  | 84544590      | C        | T        | 0.06031  | 0.05446  | 0.374    | 1.106  | 0.8855 | 1.382  |
| rs59120392 | 84544797      | C        | T        | 0.1791   | 0.1785   | 0.6283   | 1.033  | 0.9054 | 1.179  |
| rs61464600 | 84545305      | A        | G        | 0.1783   | 0.1785   | 0.7003   | 1.026  | 0.8998 | 1.17   |
| rs13337463 | 84545523      | A        | G        | 0.2316   | 0.2485   | 0.2048   | 0.9256 | 0.8214 | 1.043  |
| rs73268919 | 84545536      | G        | A        | 0.1781   | 0.1785   | 0.7153   | 1.025  | 0.8986 | 1.169  |
| rs8060960  | 84545861      | C        | T        | 0.2957   | 0.3031   | 0.6464   | 0.975  | 0.8749 | 1.086  |
| rs8048151  | 84546099      | T        | C        | 0.1328   | 0.1528   | 0.0556   | 0.8648 | 0.7452 | 1.003  |
| rs11861594 | 84546240      | G        | A        | 0.01718  | 0.01975  | 0.673    | 0.9218 | 0.6315 | 1.345  |
| rs73268923 | 84546268      | C        | T        | 0.08161  | 0.08151  | 0.9617   | 1.004  | 0.8382 | 1.204  |
| 84546359   | 84546359      | G        | A        | 0.08094  | 0.08105  | 0.9767   | 1.003  | 0.8365 | 1.202  |
| rs6540235  | 84546396      | C        | T        | 0.3498   | 0.3716   | 0.09813  | 0.9158 | 0.8251 | 1.016  |
| rs7199472  | 84546685      | T        | G        | 0.2707   | 0.2811   | 0.4417   | 0.9573 | 0.8567 | 1.07   |
| rs13333193 | 84547043      | G        | A        | 0.02249  | 0.03428  | 0.001407 | 0.606  | 0.4457 | 0.8241 |
| rs4843873  | 84547276      | G        | A        | 0.09118  | 0.1074   | 0.04231  | 0.8374 | 0.7055 | 0.9939 |
| rs4843874  | 84547399      | T        | C        | 0.09633  | 0.1137   | 0.03035  | 0.8323 | 0.7049 | 0.9827 |
| rs73268928 | 84547653      | C        | G        | 0.08826  | 0.08602  | 0.7656   | 1.028  | 0.8566 | 1.234  |
| rs11117426 | 84547768      | T        | C        | 0.1193   | 0.1289   | 0.1074   | 0.8824 | 0.7578 | 1.028  |
| rs925993   | 84547852      | C        | T        | 0.0844   | 0.09948  | 0.04785  | 0.8352 | 0.6988 | 0.9983 |
| rs925992   | 84548081      | C        | T        | 0.08792  | 0.1067   | 0.01525  | 0.8075 | 0.6793 | 0.9597 |
| rs8057009  | 84548424      | T        | G        | 0.1992   | 0.1884   | 0.1646   | 1.095  | 0.9634 | 1.245  |
| rs6540236  | 84548591      | G        | A        | 0.08538  | 0.09899  | 0.08422  | 0.8567 | 0.7188 | 1.021  |
| rs6540237  | 84548593      | C        | T        | 0.1161   | 0.1162   | 0.6249   | 1.041  | 0.887  | 1.221  |
| rs12445476 | 84548770      | A        | C        | 0.07733  | 0.08398  | 0.06525  | 0.8411 | 0.6997 | 1.011  |
| 84548901   | 84548901      | G        | T        | 0.05212  | 0.04299  | 0.1105   | 1.217  | 0.9562 | 1.549  |
| rs7200248  | 84549137      | T        | C        | 0.1301   | 0.1289   | 0.5807   | 1.044  | 0.8969 | 1.214  |
| rs7185590  | 84549154      | C        | A        | 0.1152   | 0.1177   | 0.8901   | 1.011  | 0.8621 | 1.186  |
| rs7200264  | 84549163      | T        | C        | 0.1362   | 0.1335   | 0.4489   | 1.061  | 0.9098 | 1.238  |
| rs11642873 | 84549206      | A        | C        | 0.05286  | 0.05086  | 0.8826   | 0.983  | 0.7828 | 1.234  |
| rs6540238  | 84549328      | G        | A        | 0.08865  | 0.1012   | 0.1089   | 0.869  | 0.732  | 1.032  |
| rs12444486 | 84550150      | T        | C        | 0.4055   | 0.4166   | 0.2261   | 0.9395 | 0.8493 | 1.039  |
| rs4843876  | 84550233      | A        | T        | 0.1835   | 0.2      | 0.1676   | 0.9139 | 0.8042 | 1.039  |

| SNP        | Position (bp) | A2_major | A1_minor | MAF_case | MAF_ctrl | P       | OR     | L95    | U95   |
|------------|---------------|----------|----------|----------|----------|---------|--------|--------|-------|
| rs2361764  | 84550459      | C        | G        | 0.212    | 0.2275   | 0.2631  | 0.9328 | 0.8259 | 1.054 |
| rs2361763  | 84550635      | T        | C        | 0.2847   | 0.2881   | 0.9857  | 1.001  | 0.8947 | 1.12  |
| rs2885364  | 84550691      | A        | T        | 0.09532  | 0.1073   | 0.133   | 0.8801 | 0.745  | 1.04  |
| rs4843877  | 84550733      | G        | C        | 0.09586  | 0.1065   | 0.1668  | 0.8895 | 0.7534 | 1.05  |
| rs9933690  | 84550796      | C        | T        | 0.1839   | 0.2      | 0.2009  | 0.92   | 0.8096 | 1.045 |
| 84550849   | 84550849      | G        | T        | 0.01425  | 0.01648  | 0.4011  | 0.8302 | 0.5377 | 1.282 |
| rs10863203 | 84551081      | C        | T        | 0.09394  | 0.1041   | 0.1977  | 0.8955 | 0.7571 | 1.059 |
| rs17810337 | 84551566      | C        | A        | 0.09398  | 0.1046   | 0.1853  | 0.8925 | 0.7543 | 1.056 |
| rs908983   | 84552021      | T        | C        | 0.1422   | 0.1596   | 0.09156 | 0.885  | 0.7679 | 1.02  |
| rs11859063 | 84552197      | A        | C        | 0.04623  | 0.05577  | 0.1227  | 0.8315 | 0.6578 | 1.051 |
| rs883332   | 84552225      | T        | C        | 0.03473  | 0.02982  | 0.248   | 1.183  | 0.8895 | 1.573 |
| rs2049086  | 84552380      | G        | T        | 0.1347   | 0.1536   | 0.06223 | 0.8698 | 0.7512 | 1.007 |
| rs908982   | 84552384      | C        | A        | 0.1347   | 0.1536   | 0.06223 | 0.8698 | 0.7512 | 1.007 |
| rs8044852  | 84552728      | G        | A        | 0.1399   | 0.1577   | 0.07119 | 0.8762 | 0.759  | 1.011 |
| rs908981   | 84552926      | C        | T        | 0.135    | 0.1538   | 0.05963 | 0.8692 | 0.7513 | 1.006 |
| rs12446139 | 84553085      | A        | G        | 0.1348   | 0.1536   | 0.0573  | 0.8682 | 0.7505 | 1.004 |
| rs12919427 | 84553160      | G        | A        | 0.135    | 0.1538   | 0.05963 | 0.8692 | 0.7513 | 1.006 |
| rs12930405 | 84553163      | G        | C        | 0.135    | 0.1538   | 0.05963 | 0.8692 | 0.7513 | 1.006 |
| rs11642456 | 84553581      | G        | T        | 0.1353   | 0.1539   | 0.06264 | 0.8706 | 0.7523 | 1.007 |
| rs11645398 | 84553796      | A        | G        | 0.1198   | 0.1369   | 0.07137 | 0.8651 | 0.739  | 1.013 |
| 84554073   | 84554073      | C        | T        | 0.008523 | 0.01207  | 0.3118  | 0.7592 | 0.4452 | 1.295 |
| rs59015387 | 84554628      | T        | A        | 0.01903  | 0.02047  | 0.7929  | 0.9512 | 0.6546 | 1.382 |
| 84556512   | 84556512      | G        | A        | 0.0167   | 0.01868  | 0.7131  | 0.9275 | 0.6211 | 1.385 |
| rs74032515 | 84558875      | C        | G        | 0.01204  | 0.01194  | 0.8184  | 0.9453 | 0.5849 | 1.528 |

Table S5. Conditioning on rs8046526

| CHR | SNP        | BP       | A1 | TEST | NMISS | OR       | SE       | L95     | U95   | STAT     | P       |
|-----|------------|----------|----|------|-------|----------|----------|---------|-------|----------|---------|
| 16  | rs11861580 | 84456048 | G  | ADD  | 7345  | 0.9345   | 0.07251  | 0.8107  | 1.077 | -0.9335  | 0.3505  |
| 16  | rs9934049  | 84456117 | T  | ADD  | 6067  | 1.139    | 0.09563  | 0.9442  | 1.374 | 1.36     | 0.1739  |
| 16  | 84456852   | 84456852 | A  | ADD  | 7406  | 0.5795   | 0.3037   | 0.3195  | 1.051 | -1.796   | 0.07244 |
| 16  | 84457076   | 84457076 | T  | ADD  | 7391  | 1.47E+09 | 1.66E+04 | 0       | inf   | 0.00127  | 0.999   |
| 16  | rs16939834 | 84458109 | C  | ADD  | 7408  | 0.8021   | 0.2344   | 0.5067  | 1.27  | -0.9407  | 0.3469  |
| 16  | 84458146   | 84458146 | A  | ADD  | 7402  | 1.01E+09 | 1.72E+04 | 0       | inf   | 0.001203 | 0.999   |
| 16  | rs11864884 | 84458540 | T  | ADD  | 7403  | 1.029    | 0.03822  | 0.9546  | 1.109 | 0.7432   | 0.4573  |
| 16  | rs7185918  | 84458566 | T  | ADD  | 7408  | 1.027    | 0.04303  | 0.9442  | 1.118 | 0.6263   | 0.5311  |
| 16  | 84458726   | 84458726 | C  | ADD  | 7384  | 1.327    | 0.1957   | 0.9045  | 1.948 | 1.447    | 0.1478  |
| 16  | rs72805167 | 84458737 | G  | ADD  | 7232  | 1.147    | 0.4356   | 0.4885  | 2.695 | 0.3155   | 0.7524  |
| 16  | 84458834   | 84458834 | O  | ADD  | 6404  | NA       | NA       | NA      | NA    | NA       | NA      |
| 16  | rs11859433 | 84458903 | C  | ADD  | 7357  | 0.9263   | 0.07383  | 0.8015  | 1.071 | -1.037   | 0.2997  |
| 16  | 84459157   | 84459157 | G  | ADD  | 7088  | 0.9012   | 0.07564  | 0.777   | 1.045 | -1.376   | 0.1688  |
| 16  | rs12926601 | 84459167 | T  | ADD  | 7135  | 1.052    | 0.04438  | 0.9646  | 1.148 | 1.148    | 0.2511  |
| 16  | rs4843854  | 84460016 | C  | ADD  | 7381  | 1.047    | 0.03638  | 0.9746  | 1.124 | 1.253    | 0.2102  |
| 16  | rs4843855  | 84460047 | T  | ADD  | 6887  | 1.027    | 0.03909  | 0.9516  | 1.109 | 0.6904   | 0.4899  |
| 16  | rs4843856  | 84460058 | C  | ADD  | 7385  | 1.038    | 0.03465  | 0.9699  | 1.111 | 1.079    | 0.2806  |
| 16  | rs12930347 | 84461177 | C  | ADD  | 7403  | 1.03     | 0.04195  | 0.9487  | 1.118 | 0.7043   | 0.4812  |
| 16  | 84461320   | 84461320 | O  | ADD  | 7409  | NA       | NA       | NA      | NA    | NA       | NA      |
| 16  | rs62052470 | 84461723 | A  | ADD  | 6855  | 0.9126   | 0.09784  | 0.7533  | 1.105 | -0.9351  | 0.3497  |
| 16  | 84461729   | 84461729 | O  | ADD  | 7412  | NA       | NA       | NA      | NA    | NA       | NA      |
| 16  | rs62052471 | 84462333 | G  | ADD  | 6647  | 0.9837   | 0.1164   | 0.7829  | 1.236 | -0.1415  | 0.8875  |
| 16  | 84462405   | 84462405 | A  | ADD  | 6309  | 1.03     | 0.04391  | 0.9452  | 1.123 | 0.6757   | 0.4992  |
| 16  | 84462407   | 84462407 | A  | ADD  | 5681  | 1.059    | 0.04835  | 0.9633  | 1.164 | 1.186    | 0.2356  |
| 16  | 84462423   | 84462423 | A  | ADD  | 5171  | 1.04     | 0.126    | 0.8124  | 1.331 | 0.3106   | 0.7561  |
| 16  | 84462425   | 84462425 | A  | ADD  | 3737  | 1.201    | 0.09327  | 1       | 1.442 | 1.963    | 0.0496  |
| 16  | 84462437   | 84462437 | C  | ADD  | 3985  | 1.142    | 0.09826  | 0.942   | 1.385 | 1.352    | 0.1763  |
| 16  | 84462507   | 84462507 | C  | ADD  | 5001  | 1.228    | 0.1119   | 0.9861  | 1.529 | 1.834    | 0.06659 |
| 16  | 84462539   | 84462539 | C  | ADD  | 7127  | 0.925    | 0.1157   | 0.7373  | 1.161 | -0.6736  | 0.5006  |
| 16  | rs55697192 | 84462546 | C  | ADD  | 6053  | 1.048    | 0.07261  | 0.9087  | 1.208 | 0.6421   | 0.5208  |
| 16  | 84463073   | 84463073 | A  | ADD  | 6714  | 1.39     | 0.2284   | 0.8887  | 2.176 | 1.443    | 0.1489  |
| 16  | 84463237   | 84463237 | T  | ADD  | 7247  | 0.8956   | 0.194    | 0.6124  | 1.31  | -0.5685  | 0.5697  |
| 16  | rs12935659 | 84463429 | C  | ADD  | 7387  | 0.9972   | 0.03789  | 0.9258  | 1.074 | -0.07367 | 0.9413  |
| 16  | 84463607   | 84463607 | O  | ADD  | 7413  | NA       | NA       | NA      | NA    | NA       | NA      |
| 16  | rs72805168 | 84463633 | C  | ADD  | 7275  | 1.269    | 0.9786   | 0.1864  | 8.635 | 0.2431   | 0.8079  |
| 16  | rs62052474 | 84463910 | A  | ADD  | 7380  | 0.8739   | 0.07198  | 0.759   | 1.006 | -1.872   | 0.06122 |
| 16  | 84463953   | 84463953 | T  | ADD  | 7366  | 0.7038   | 1.415    | 0.04393 | 11.28 | -0.2482  | 0.804   |
| 16  | 84463987   | 84463987 | O  | ADD  | 7413  | NA       | NA       | NA      | NA    | NA       | NA      |
| 16  | 84464105   | 84464105 | O  | ADD  | 7413  | NA       | NA       | NA      | NA    | NA       | NA      |
| 16  | rs11648716 | 84464117 | G  | ADD  | 7412  | 0.8914   | 0.07069  | 0.7761  | 1.024 | -1.626   | 0.1039  |
| 16  | rs8056522  | 84464397 | C  | ADD  | 7402  | 1.038    | 0.04366  | 0.9532  | 1.131 | 0.8619   | 0.3887  |
| 16  | rs9929675  | 84464599 | A  | ADD  | 7376  | 1.001    | 0.03817  | 0.9291  | 1.079 | 0.03283  | 0.9738  |
| 16  | rs9929701  | 84464675 | C  | ADD  | 7377  | 1.001    | 0.03817  | 0.9293  | 1.079 | 0.03856  | 0.9692  |
| 16  | rs9924234  | 84465076 | C  | ADD  | 7382  | 1.003    | 0.03816  | 0.9306  | 1.081 | 0.07614  | 0.9393  |
| 16  | rs9930043  | 84465079 | C  | ADD  | 7390  | 1.002    | 0.03816  | 0.93    | 1.08  | 0.05667  | 0.9548  |
| 16  | 84465151   | 84465151 | C  | ADD  | 7346  | 1.046    | 0.04335  | 0.9608  | 1.139 | 1.037    | 0.2996  |
| 16  | rs9932359  | 84465411 | A  | ADD  | 7380  | 1.003    | 0.03816  | 0.9308  | 1.081 | 0.08145  | 0.9351  |
| 16  | rs12448297 | 84467210 | O  | ADD  | 7413  | NA       | NA       | NA      | NA    | NA       | NA      |
| 16  | rs13336885 | 84469034 | C  | ADD  | 7263  | 1.004    | 0.03829  | 0.9312  | 1.082 | 0.09959  | 0.9207  |
| 16  | rs7200396  | 84469798 | C  | ADD  | 7384  | 0.9946   | 0.03785  | 0.9235  | 1.071 | -0.1425  | 0.8867  |
| 16  | rs9923975  | 84469936 | G  | ADD  | 7367  | 1.055    | 0.04401  | 0.9679  | 1.15  | 1.218    | 0.2232  |
| 16  | rs9932159  | 84470103 | T  | ADD  | 7387  | 0.9967   | 0.03797  | 0.9252  | 1.074 | -0.08734 | 0.9304  |

| CHR | SNP        | BP       | A1 | TEST | NMISS | OR       | SE       | L95    | U95    | STAT       | P       |
|-----|------------|----------|----|------|-------|----------|----------|--------|--------|------------|---------|
| 16  | rs9936199  | 84470118 | G  | ADD  | 7387  | 0.9948   | 0.03785  | 0.9237 | 1.071  | -0.1379    | 0.8903  |
| 16  | rs750669   | 84470371 | G  | ADD  | 7340  | 1.037    | 0.0349   | 0.9688 | 1.111  | 1.053      | 0.2925  |
| 16  | rs2017161  | 84470594 | C  | ADD  | 7240  | 0.9874   | 0.03803  | 0.9165 | 1.064  | -0.3338    | 0.7385  |
| 16  | 84470606   | 84470606 | A  | ADD  | 7368  | 1.033    | 0.03466  | 0.9651 | 1.106  | 0.9348     | 0.3499  |
| 16  | 84471137   | 84471137 | G  | ADD  | 7387  | 8.22E+08 | 1.72E+04 | 0      | inf    | 0.001191   | 0.999   |
| 16  | 84471981   | 84471981 | T  | ADD  | 6665  | 0.9503   | 0.1345   | 0.7301 | 1.237  | -0.3787    | 0.7049  |
| 16  | 84472217   | 84472217 | T  | ADD  | 6983  | 4.12E-10 | 2.44E+04 | 0      | inf    | -0.0008865 | 0.9993  |
| 16  | rs55967832 | 84472469 | C  | ADD  | 7172  | 1.03     | 0.03508  | 0.9615 | 1.103  | 0.8418     | 0.3999  |
| 16  | rs9925103  | 84472609 | G  | ADD  | 7080  | 0.8647   | 0.2284   | 0.5527 | 1.353  | -0.6367    | 0.5243  |
| 16  | rs34318854 | 84472707 | C  | ADD  | 7171  | 1.03     | 0.03508  | 0.9617 | 1.103  | 0.8457     | 0.3977  |
| 16  | rs34723871 | 84472711 | C  | ADD  | 7171  | 1.03     | 0.03508  | 0.9617 | 1.103  | 0.8457     | 0.3977  |
| 16  | rs56143130 | 84472719 | C  | ADD  | 7171  | 1.03     | 0.03508  | 0.9617 | 1.103  | 0.8457     | 0.3977  |
| 16  | rs9925282  | 84472806 | O  | ADD  | 7413  | NA       | NA       | NA     | NA     | NA         | NA      |
| 16  | rs9931862  | 84472878 | T  | ADD  | 7178  | 1.079    | 0.04424  | 0.9891 | 1.176  | 1.713      | 0.0868  |
| 16  | rs9931687  | 84473282 | A  | ADD  | 7393  | 1.099    | 0.04377  | 1.009  | 1.198  | 2.165      | 0.0304  |
| 16  | rs6540231  | 84473561 | G  | ADD  | 7369  | 1.019    | 0.03463  | 0.9525 | 1.091  | 0.5553     | 0.5787  |
| 16  | 84473745   | 84473745 | O  | ADD  | 6414  | NA       | NA       | NA     | NA     | NA         | NA      |
| 16  | 84474001   | 84474001 | C  | ADD  | 6413  | 0.9566   | 0.04451  | 0.8767 | 1.044  | -0.9964    | 0.3191  |
| 16  | 84474531   | 84474531 | C  | ADD  | 6720  | 0.8521   | 0.8612   | 0.1575 | 4.608  | -0.1859    | 0.8525  |
| 16  | rs367170   | 84474588 | A  | ADD  | 4844  | 1.205    | 0.09879  | 0.9925 | 1.462  | 1.884      | 0.05961 |
| 16  | rs409219   | 84474592 | T  | ADD  | 4769  | 1.364    | 0.1207   | 1.077  | 1.728  | 2.572      | 0.01013 |
| 16  | 84474714   | 84474714 | C  | ADD  | 5062  | 1.067    | 0.05728  | 0.954  | 1.194  | 1.138      | 0.255   |
| 16  | rs62052475 | 84474717 | C  | ADD  | 5071  | 1.069    | 0.05711  | 0.9558 | 1.196  | 1.168      | 0.2427  |
| 16  | 84474721   | 84474721 | C  | ADD  | 5754  | 1.052    | 0.1593   | 0.7701 | 1.438  | 0.3194     | 0.7494  |
| 16  | rs426900   | 84474799 | C  | ADD  | 6773  | 0.9829   | 0.07664  | 0.8458 | 1.142  | -0.225     | 0.822   |
| 16  | rs9937847  | 84475052 | C  | ADD  | 7398  | 0.9535   | 0.06677  | 0.8365 | 1.087  | -0.7132    | 0.4757  |
| 16  | rs16939877 | 84475320 | A  | ADD  | 6826  | 0.8187   | 0.1116   | 0.6579 | 1.019  | -1.792     | 0.07319 |
| 16  | rs376783   | 84475324 | A  | ADD  | 7405  | 1.111    | 0.04149  | 1.025  | 1.206  | 2.547      | 0.01086 |
| 16  | rs428578   | 84475445 | G  | ADD  | 7305  | 1.034    | 0.03603  | 0.9639 | 1.11   | 0.9407     | 0.3469  |
| 16  | 84475528   | 84475528 | A  | ADD  | 7044  | 0.8972   | 0.2065   | 0.5985 | 1.345  | -0.5251    | 0.5995  |
| 16  | rs371800   | 84475621 | T  | ADD  | 7384  | 1.174    | 0.09071  | 0.983  | 1.403  | 1.771      | 0.07651 |
| 16  | rs447377   | 84476336 | G  | ADD  | 7378  | 1.032    | 0.03586  | 0.9617 | 1.107  | 0.8703     | 0.3841  |
| 16  | rs9936406  | 84476343 | T  | ADD  | 7407  | 1.003    | 0.03695  | 0.9326 | 1.078  | 0.07101    | 0.9434  |
| 16  | 84476544   | 84476544 | C  | ADD  | 7343  | 0.9428   | 0.06969  | 0.8225 | 1.081  | -0.8447    | 0.3983  |
| 16  | rs439390   | 84476707 | G  | ADD  | 7143  | 1.015    | 0.03644  | 0.9454 | 1.091  | 0.4193     | 0.675   |
| 16  | 84476754   | 84476754 | C  | ADD  | 7369  | 0.8316   | 0.08721  | 0.7009 | 0.9866 | -2.115     | 0.03442 |
| 16  | rs9928868  | 84476971 | C  | ADD  | 7368  | 0.8707   | 0.5561   | 0.2928 | 2.59   | -0.2489    | 0.8034  |
| 16  | rs384915   | 84477113 | A  | ADD  | 7352  | 1.15     | 0.0932   | 0.9581 | 1.381  | 1.5        | 0.1336  |
| 16  | 84477167   | 84477167 | C  | ADD  | 4723  | 0.9333   | 0.0764   | 0.8035 | 1.084  | -0.9031    | 0.3665  |
| 16  | 84477725   | 84477725 | A  | ADD  | 7403  | 4.12     | 1.287    | 0.3308 | 51.31  | 1.1        | 0.2712  |
| 16  | rs438968   | 84477729 | C  | ADD  | 7358  | 1.03     | 0.03575  | 0.9604 | 1.105  | 0.8288     | 0.4072  |
| 16  | rs12596376 | 84477898 | C  | ADD  | 7285  | 1.019    | 0.03983  | 0.9429 | 1.102  | 0.4845     | 0.628   |
| 16  | rs370703   | 84477981 | T  | ADD  | 7402  | 1.032    | 0.03573  | 0.9619 | 1.106  | 0.8713     | 0.3836  |
| 16  | 84478065   | 84478065 | G  | ADD  | 7386  | 0.5793   | 0.7936   | 0.1223 | 2.745  | -0.6878    | 0.4916  |
| 16  | rs395922   | 84478180 | C  | ADD  | 7004  | 1.075    | 0.09431  | 0.8939 | 1.294  | 0.77       | 0.4413  |
| 16  | rs6540232  | 84478303 | C  | ADD  | 7308  | 1.009    | 0.03712  | 0.938  | 1.085  | 0.2349     | 0.8143  |
| 16  | 84478601   | 84478601 | C  | ADD  | 7386  | 1.176    | 0.09456  | 0.9769 | 1.415  | 1.713      | 0.08673 |
| 16  | rs448136   | 84478848 | C  | ADD  | 7015  | 1.011    | 0.0359   | 0.9419 | 1.084  | 0.2931     | 0.7694  |
| 16  | 84478905   | 84478905 | C  | ADD  | 7408  | 0.6358   | 0.2958   | 0.3561 | 1.135  | -1.531     | 0.1258  |
| 16  | rs11642286 | 84479110 | G  | ADD  | 7409  | 0.8228   | 0.08469  | 0.697  | 0.9714 | -2.302     | 0.02131 |
| 16  | rs391821   | 84479528 | T  | ADD  | 7103  | 1.034    | 0.09489  | 0.8583 | 1.245  | 0.3491     | 0.727   |
| 16  | rs428530   | 84480360 | G  | ADD  | 7354  | 1.154    | 0.09135  | 0.9651 | 1.381  | 1.572      | 0.116   |

| CHR | SNP        | BP       | A1 | TEST | NMISS | OR       | SE       | L95    | U95    | STAT     | P       |
|-----|------------|----------|----|------|-------|----------|----------|--------|--------|----------|---------|
| 16  | rs11866609 | 84480582 | G  | ADD  | 7411  | 1.292    | 0.3781   | 0.6158 | 2.71   | 0.6775   | 0.4981  |
| 16  | rs421710   | 84481015 | C  | ADD  | 7409  | 1.027    | 0.03571  | 0.9576 | 1.101  | 0.7461   | 0.4556  |
| 16  | rs9308363  | 84481566 | C  | ADD  | 7365  | 1.003    | 0.03666  | 0.9338 | 1.078  | 0.09192  | 0.9268  |
| 16  | 84481963   | 84481963 | A  | ADD  | 6909  | 0.772    | 0.3317   | 0.403  | 1.479  | -0.7802  | 0.4353  |
| 16  | rs433322   | 84482073 | G  | ADD  | 7345  | 1.03     | 0.0357   | 0.96   | 1.104  | 0.8171   | 0.4139  |
| 16  | rs11860464 | 84482464 | T  | ADD  | 7259  | 0.8268   | 0.5081   | 0.3054 | 2.238  | -0.3743  | 0.7082  |
| 16  | 84482479   | 84482479 | C  | ADD  | 7355  | 1.006    | 0.0367   | 0.9359 | 1.081  | 0.1561   | 0.876   |
| 16  | 84482626   | 84482626 | O  | ADD  | 7131  | NA       | NA       | NA     | NA     | NA       | NA      |
| 16  | rs401528   | 84482872 | G  | ADD  | 7322  | 1.165    | 0.08843  | 0.9796 | 1.385  | 1.727    | 0.08423 |
| 16  | rs7193803  | 84483174 | G  | ADD  | 7409  | 1.005    | 0.0367   | 0.9351 | 1.08   | 0.1317   | 0.8952  |
| 16  | 84483336   | 84483336 | O  | ADD  | 7401  | NA       | NA       | NA     | NA     | NA       | NA      |
| 16  | rs11117411 | 84483439 | T  | ADD  | 7326  | 0.826    | 0.08728  | 0.6961 | 0.9801 | -2.19    | 0.02853 |
| 16  | rs437740   | 84483537 | C  | ADD  | 7386  | 1.156    | 0.09227  | 0.9649 | 1.385  | 1.573    | 0.1157  |
| 16  | 84483596   | 84483596 | A  | ADD  | 7206  | 0.882    | 0.2102   | 0.5842 | 1.332  | -0.5976  | 0.5501  |
| 16  | rs438323   | 84483902 | C  | ADD  | 7384  | 1.16     | 0.09236  | 0.9677 | 1.39   | 1.604    | 0.1087  |
| 16  | rs12922615 | 84484196 | T  | ADD  | 7311  | 0.9155   | 0.07076  | 0.797  | 1.052  | -1.247   | 0.2124  |
| 16  | rs394100   | 84484220 | A  | ADD  | 7204  | 1.111    | 0.08899  | 0.9333 | 1.323  | 1.184    | 0.2363  |
| 16  | rs395498   | 84484222 | G  | ADD  | 7318  | 1.038    | 0.03583  | 0.9672 | 1.113  | 1.03     | 0.3028  |
| 16  | rs452478   | 84484245 | G  | ADD  | 7383  | 1.154    | 0.09223  | 0.963  | 1.383  | 1.552    | 0.1207  |
| 16  | rs452532   | 84484267 | G  | ADD  | 7382  | 1.159    | 0.09235  | 0.9675 | 1.389  | 1.602    | 0.1092  |
| 16  | rs11117412 | 84484343 | A  | ADD  | 7101  | 1.039    | 0.04064  | 0.9597 | 1.125  | 0.9472   | 0.3435  |
| 16  | rs434216   | 84484514 | C  | ADD  | 7051  | 1.029    | 0.03605  | 0.9585 | 1.104  | 0.7844   | 0.4328  |
| 16  | rs1809094  | 84484727 | A  | ADD  | 6709  | 1.026    | 0.04411  | 0.9412 | 1.119  | 0.5853   | 0.5584  |
| 16  | 84484809   | 84484809 | G  | ADD  | 7273  | 1.549    | 0.3749   | 0.7431 | 3.23   | 1.168    | 0.2429  |
| 16  | rs572967   | 84484995 | G  | ADD  | 7260  | 1.023    | 0.0366   | 0.9524 | 1.099  | 0.6274   | 0.5304  |
| 16  | rs896263   | 84485020 | G  | ADD  | 7406  | 1.05     | 0.0401   | 0.9706 | 1.136  | 1.217    | 0.2238  |
| 16  | rs403605   | 84485129 | A  | ADD  | 7399  | 0.9233   | 0.06019  | 0.8205 | 1.039  | -1.327   | 0.1847  |
| 16  | rs454128   | 84485236 | G  | ADD  | 7045  | 1.061    | 0.04028  | 0.9808 | 1.149  | 1.479    | 0.1391  |
| 16  | rs391023   | 84485315 | T  | ADD  | 7359  | 1.063    | 0.03582  | 0.9907 | 1.14   | 1.699    | 0.0894  |
| 16  | rs375288   | 84485372 | A  | ADD  | 7293  | 1.039    | 0.0369   | 0.9669 | 1.117  | 1.047    | 0.2951  |
| 16  | rs446836   | 84485520 | T  | ADD  | 7063  | 0.7336   | 0.2987   | 0.4085 | 1.317  | -1.037   | 0.2997  |
| 16  | rs873616   | 84485667 | G  | ADD  | 7079  | 1.106    | 0.04574  | 1.011  | 1.209  | 2.194    | 0.0282  |
| 16  | 84485701   | 84485701 | O  | ADD  | 7412  | NA       | NA       | NA     | NA     | NA       | NA      |
| 16  | rs60241040 | 84486065 | G  | ADD  | 7338  | 1.091    | 0.04471  | 0.999  | 1.19   | 1.938    | 0.05266 |
| 16  | rs391855   | 84486122 | T  | ADD  | 7402  | 1.098    | 0.03714  | 1.021  | 1.181  | 2.526    | 0.01155 |
| 16  | rs12149363 | 84486206 | G  | ADD  | 7336  | 0.9108   | 0.07063  | 0.7931 | 1.046  | -1.323   | 0.186   |
| 16  | rs386098   | 84486701 | A  | ADD  | 7213  | 0.9201   | 0.06915  | 0.8035 | 1.054  | -1.205   | 0.2282  |
| 16  | rs369173   | 84486783 | G  | ADD  | 7406  | 1.084    | 0.03671  | 1.009  | 1.165  | 2.205    | 0.02747 |
| 16  | rs398114   | 84486785 | C  | ADD  | 7189  | 1.092    | 0.03743  | 1.015  | 1.175  | 2.347    | 0.0189  |
| 16  | rs369597   | 84486935 | C  | ADD  | 7396  | 0.917    | 0.06872  | 0.8014 | 1.049  | -1.261   | 0.2072  |
| 16  | rs9924391  | 84487331 | T  | ADD  | 7405  | 0.9054   | 0.06962  | 0.7899 | 1.038  | -1.427   | 0.1535  |
| 16  | rs9932449  | 84487333 | A  | ADD  | 7403  | 0.9127   | 0.06865  | 0.7978 | 1.044  | -1.331   | 0.1832  |
| 16  | rs371391   | 84487395 | C  | ADD  | 7402  | 0.9223   | 0.06891  | 0.8058 | 1.056  | -1.174   | 0.2403  |
| 16  | rs388405   | 84487398 | A  | ADD  | 7411  | 0.9077   | 0.06837  | 0.7939 | 1.038  | -1.417   | 0.1565  |
| 16  | rs28368111 | 84487756 | C  | ADD  | 7373  | 1.441    | 0.402    | 0.6553 | 3.168  | 0.9084   | 0.3637  |
| 16  | 84487779   | 84487779 | T  | ADD  | 7355  | 1.01E+09 | 1.72E+04 | 0      | inf    | 0.001203 | 0.999   |
| 16  | rs381139   | 84487901 | C  | ADD  | 7297  | 0.9161   | 0.06991  | 0.7988 | 1.051  | -1.254   | 0.2098  |
| 16  | rs393512   | 84488072 | C  | ADD  | 7351  | 0.8891   | 0.06843  | 0.7775 | 1.017  | -1.718   | 0.08582 |
| 16  | rs416515   | 84488175 | C  | ADD  | 7343  | 0.9092   | 0.07004  | 0.7926 | 1.043  | -1.359   | 0.1742  |
| 16  | rs398229   | 84488191 | A  | ADD  | 7343  | 0.9092   | 0.07004  | 0.7926 | 1.043  | -1.359   | 0.1742  |
| 16  | 84488361   | 84488361 | C  | ADD  | 1979  | 1.138    | 0.1226   | 0.895  | 1.447  | 1.055    | 0.2913  |
| 16  | 84488362   | 84488362 | C  | ADD  | 3766  | 0.9949   | 0.1199   | 0.7865 | 1.259  | -0.04258 | 0.966   |

| CHR | SNP        | BP       | A1 | TEST | NMISS | OR     | SE      | L95    | U95    | STAT     | P        |
|-----|------------|----------|----|------|-------|--------|---------|--------|--------|----------|----------|
| 16  | rs28368112 | 84488458 | C  | ADD  | 7009  | 1.101  | 0.04496 | 1.008  | 1.202  | 2.134    | 0.03286  |
| 16  | 84488780   | 84488780 | C  | ADD  | 7128  | 0.5805 | 0.3285  | 0.3049 | 1.105  | -1.656   | 0.09774  |
| 16  | rs170033   | 84489005 | A  | ADD  | 6679  | 0.9624 | 0.06618 | 0.8453 | 1.096  | -0.5786  | 0.5629   |
| 16  | 84489382   | 84489382 | O  | ADD  | 7412  | NA     | NA      | NA     | NA     | NA       | NA       |
| 16  | rs4843859  | 84489457 | G  | ADD  | 7330  | 1.08   | 0.04362 | 0.9916 | 1.176  | 1.766    | 0.07742  |
| 16  | rs8058349  | 84489530 | G  | ADD  | 7380  | 0.8538 | 0.07119 | 0.7426 | 0.9816 | -2.221   | 0.02637  |
| 16  | rs191022   | 84489633 | G  | ADD  | 7280  | 1.035  | 0.04013 | 0.9572 | 1.12   | 0.8686   | 0.385    |
| 16  | rs188602   | 84489852 | T  | ADD  | 7261  | 0.8899 | 0.06974 | 0.7762 | 1.02   | -1.673   | 0.09428  |
| 16  | rs422186   | 84489971 | A  | ADD  | 7360  | 0.8918 | 0.07042 | 0.7768 | 1.024  | -1.626   | 0.1038   |
| 16  | rs56177354 | 84490153 | T  | ADD  | 6708  | 0.8059 | 0.2983  | 0.4491 | 1.446  | -0.7232  | 0.4695   |
| 16  | rs2270501  | 84490489 | T  | ADD  | 7404  | 1.106  | 0.04498 | 1.013  | 1.208  | 2.237    | 0.02527  |
| 16  | rs2270502  | 84490539 | T  | ADD  | 7220  | 0.8756 | 0.07554 | 0.7551 | 1.015  | -1.759   | 0.07864  |
| 16  | 84490567   | 84490567 | O  | ADD  | 7404  | NA     | NA      | NA     | NA     | NA       | NA       |
| 16  | 84490724   | 84490724 | A  | ADD  | 7354  | 1.015  | 1.068   | 0.1252 | 8.222  | 0.01357  | 0.9892   |
| 16  | 84491082   | 84491082 | A  | ADD  | 7323  | 1.237  | 0.09604 | 1.025  | 1.493  | 2.213    | 0.02693  |
| 16  | rs56196648 | 84491219 | A  | ADD  | 6628  | 1.017  | 0.1348  | 0.7807 | 1.324  | 0.1227   | 0.9023   |
| 16  | rs305084   | 84491669 | C  | ADD  | 7340  | 1.113  | 0.05854 | 0.9925 | 1.249  | 1.832    | 0.06702  |
| 16  | rs12447817 | 84491725 | A  | ADD  | 5209  | 0.9356 | 0.1398  | 0.7113 | 1.231  | -0.4764  | 0.6338   |
| 16  | 84491886   | 84491886 | G  | ADD  | 7371  | 1.98   | 0.3861  | 0.9288 | 4.219  | 1.769    | 0.07696  |
| 16  | 84491947   | 84491947 | O  | ADD  | 7413  | NA     | NA      | NA     | NA     | NA       | NA       |
| 16  | 84492016   | 84492016 | C  | ADD  | 7202  | 0.9099 | 0.07395 | 0.7871 | 1.052  | -1.277   | 0.2017   |
| 16  | rs1519978  | 84492712 | T  | ADD  | 7377  | 1.251  | 0.07014 | 1.09   | 1.435  | 3.194    | 0.001404 |
| 16  | rs16939906 | 84493007 | A  | ADD  | 7335  | 1.285  | 0.5776  | 0.4142 | 3.985  | 0.4339   | 0.6644   |
| 16  | 84493033   | 84493033 | C  | ADD  | 5882  | 0.7797 | 0.2729  | 0.4566 | 1.331  | -0.9119  | 0.3618   |
| 16  | rs16882    | 84493074 | C  | ADD  | 7400  | 1.24   | 0.06943 | 1.082  | 1.421  | 3.098    | 0.001947 |
| 16  | rs11649549 | 84493298 | C  | ADD  | 7392  | 1.232  | 0.06953 | 1.075  | 1.412  | 2.998    | 0.002721 |
| 16  | rs305083   | 84493379 | G  | ADD  | 7270  | 1.23   | 0.06991 | 1.072  | 1.41   | 2.959    | 0.003085 |
| 16  | rs12924316 | 84493764 | T  | ADD  | 7407  | 1.094  | 0.04467 | 1.002  | 1.194  | 2.01     | 0.0444   |
| 16  | 84493893   | 84493893 | C  | ADD  | 4285  | 1.203  | 0.06161 | 1.066  | 1.357  | 2.996    | 0.002735 |
| 16  | 84493900   | 84493900 | C  | ADD  | 4348  | 1.201  | 0.06151 | 1.065  | 1.355  | 2.978    | 0.002898 |
| 16  | 84493903   | 84493903 | C  | ADD  | 4349  | 1.197  | 0.06149 | 1.061  | 1.351  | 2.929    | 0.003402 |
| 16  | 84493958   | 84493958 | C  | ADD  | 7387  | 1.503  | 0.434   | 0.6421 | 3.519  | 0.939    | 0.3477   |
| 16  | 84494383   | 84494383 | T  | ADD  | 7240  | 0.9904 | 0.1926  | 0.679  | 1.445  | -0.05021 | 0.96     |
| 16  | rs305082   | 84494479 | C  | ADD  | 7403  | 1.238  | 0.06819 | 1.083  | 1.415  | 3.131    | 0.001742 |
| 16  | 84494689   | 84494689 | O  | ADD  | 7388  | NA     | NA      | NA     | NA     | NA       | NA       |
| 16  | 84494863   | 84494863 | C  | ADD  | 7375  | 1.264  | 0.09357 | 1.052  | 1.518  | 2.5      | 0.01241  |
| 16  | 84495087   | 84495087 | T  | ADD  | 7236  | 2.259  | 0.9142  | 0.3765 | 13.55  | 0.8914   | 0.3727   |
| 16  | rs182511   | 84495157 | G  | ADD  | 7410  | 1.096  | 0.1287  | 0.8515 | 1.41   | 0.7114   | 0.4769   |
| 16  | 84495288   | 84495288 | O  | ADD  | 7040  | NA     | NA      | NA     | NA     | NA       | NA       |
| 16  | 84495780   | 84495780 | A  | ADD  | 7392  | 1.443  | 1.083   | 0.1729 | 12.05  | 0.339    | 0.7346   |
| 16  | 84495918   | 84495918 | C  | ADD  | 4733  | 1.403  | 0.1655  | 1.014  | 1.941  | 2.047    | 0.04069  |
| 16  | 84495937   | 84495937 | C  | ADD  | 5833  | 0.8526 | 0.1116  | 0.6852 | 1.061  | -1.429   | 0.153    |
| 16  | 84495977   | 84495977 | C  | ADD  | 7120  | 0.8992 | 0.1849  | 0.6258 | 1.292  | -0.5746  | 0.5655   |
| 16  | rs11642583 | 84496096 | G  | ADD  | 7370  | 1.211  | 0.1037  | 0.9885 | 1.484  | 1.848    | 0.06454  |
| 16  | rs9940980  | 84496182 | T  | ADD  | 7409  | 1.211  | 0.1027  | 0.9898 | 1.48   | 1.86     | 0.06282  |
| 16  | rs9926664  | 84496256 | G  | ADD  | 7386  | 1.216  | 0.1029  | 0.9942 | 1.488  | 1.903    | 0.057    |
| 16  | rs11646550 | 84496336 | A  | ADD  | 7361  | 1.245  | 0.1071  | 1.009  | 1.536  | 2.046    | 0.04078  |
| 16  | 84496676   | 84496676 | O  | ADD  | 7402  | NA     | NA      | NA     | NA     | NA       | NA       |
| 16  | 84496724   | 84496724 | O  | ADD  | 7412  | NA     | NA      | NA     | NA     | NA       | NA       |
| 16  | 84496745   | 84496745 | C  | ADD  | 7122  | 1.463  | 1.083   | 0.1752 | 12.22  | 0.3514   | 0.7253   |
| 16  | 84496751   | 84496751 | C  | ADD  | 7122  | 1.463  | 1.083   | 0.1752 | 12.22  | 0.3514   | 0.7253   |
| 16  | rs3794662  | 84497151 | A  | ADD  | 7396  | 1.273  | 0.09323 | 1.06   | 1.528  | 2.585    | 0.009726 |



| CHR | SNP        | BP       | A1 | TEST | NMISS | OR     | SE      | L95     | U95   | STAT     | P         |
|-----|------------|----------|----|------|-------|--------|---------|---------|-------|----------|-----------|
| 16  | 84497159   | 84497159 | 0  | ADD  | 7405  | NA     | NA      | NA      | NA    | NA       | NA        |
| 16  | rs3794661  | 84497167 | A  | ADD  | 7369  | 1.235  | 0.09395 | 1.027   | 1.484 | 2.245    | 0.02479   |
| 16  | rs62052556 | 84497511 | T  | ADD  | 7328  | 1.246  | 0.1147  | 0.9949  | 1.56  | 1.916    | 0.05542   |
| 16  | 84497894   | 84497894 | G  | ADD  | 7303  | 0.7785 | 0.7329  | 0.1851  | 3.274 | -0.3416  | 0.7327    |
| 16  | 84497914   | 84497914 | G  | ADD  | 7303  | 0.7785 | 0.7329  | 0.1851  | 3.274 | -0.3416  | 0.7327    |
| 16  | 84498477   | 84498477 | G  | ADD  | 7126  | 0.9279 | 0.1294  | 0.72    | 1.196 | -0.5782  | 0.5631    |
| 16  | rs4843320  | 84498514 | T  | ADD  | 7273  | 1.078  | 0.04664 | 0.9838  | 1.181 | 1.61     | 0.1073    |
| 16  | 84498527   | 84498527 | A  | ADD  | 7221  | 0.9916 | 0.1926  | 0.6799  | 1.446 | -0.04355 | 0.9653    |
| 16  | 84498533   | 84498533 | T  | ADD  | 7129  | 0.9419 | 0.301   | 0.5222  | 1.699 | -0.1988  | 0.8424    |
| 16  | 84499184   | 84499184 | G  | ADD  | 7365  | 1.506  | 0.5041  | 0.5607  | 4.044 | 0.8121   | 0.4167    |
| 16  | rs305080   | 84499275 | T  | ADD  | 7311  | 1.132  | 0.04073 | 1.046   | 1.227 | 3.054    | 0.002259  |
| 16  | 84499414   | 84499414 | G  | ADD  | 7192  | 1.223  | 0.1803  | 0.8589  | 1.741 | 1.116    | 0.2643    |
| 16  | rs10514610 | 84499676 | C  | ADD  | 7411  | 1.234  | 0.08992 | 1.035   | 1.472 | 2.34     | 0.0193    |
| 16  | rs16939917 | 84499921 | A  | ADD  | 7353  | 1.244  | 0.09038 | 1.042   | 1.485 | 2.419    | 0.01558   |
| 16  | rs305079   | 84499997 | C  | ADD  | 7401  | 1.274  | 0.0871  | 1.074   | 1.511 | 2.777    | 0.005488  |
| 16  | 84500417   | 84500417 | 0  | ADD  | 7380  | NA     | NA      | NA      | NA    | NA       | NA        |
| 16  | rs305078   | 84500644 | G  | ADD  | 7379  | 2.639  | 0.539   | 0.9174  | 7.589 | 1.8      | 0.07187   |
| 16  | rs3794660  | 84500669 | C  | ADD  | 7321  | 1.235  | 0.09666 | 1.022   | 1.493 | 2.186    | 0.02885   |
| 16  | 84500726   | 84500726 | T  | ADD  | 7221  | 0.9923 | 0.1926  | 0.6804  | 1.447 | -0.04013 | 0.968     |
| 16  | rs305077   | 84500967 | C  | ADD  | 7406  | 1.159  | 0.04034 | 1.071   | 1.254 | 3.659    | 0.0002529 |
| 16  | 84501753   | 84501753 | 0  | ADD  | 7405  | NA     | NA      | NA      | NA    | NA       | NA        |
| 16  | 84501767   | 84501767 | 0  | ADD  | 7405  | NA     | NA      | NA      | NA    | NA       | NA        |
| 16  | 84501890   | 84501890 | 0  | ADD  | 7413  | NA     | NA      | NA      | NA    | NA       | NA        |
| 16  | 84501918   | 84501918 | 0  | ADD  | 7399  | NA     | NA      | NA      | NA    | NA       | NA        |
| 16  | rs391525   | 84501940 | G  | ADD  | 7401  | 1.156  | 0.04031 | 1.069   | 1.252 | 3.606    | 0.0003104 |
| 16  | rs366304   | 84502301 | A  | ADD  | 7345  | 0.7627 | 0.4975  | 0.2877  | 2.022 | -0.5444  | 0.5862    |
| 16  | rs2292982  | 84502324 | G  | ADD  | 7407  | 1.165  | 0.04039 | 1.077   | 1.261 | 3.787    | 0.0001526 |
| 16  | 84502367   | 84502367 | 0  | ADD  | 7362  | NA     | NA      | NA      | NA    | NA       | NA        |
| 16  | rs2292980  | 84502577 | C  | ADD  | 7406  | 1.167  | 0.04037 | 1.078   | 1.263 | 3.824    | 0.0001315 |
| 16  | 84502640   | 84502640 | A  | ADD  | 7411  | 2.023  | 0.7954  | 0.4254  | 9.615 | 0.8855   | 0.3759    |
| 16  | rs8052064  | 84502732 | T  | ADD  | 7214  | 1.175  | 0.1131  | 0.9411  | 1.466 | 1.423    | 0.1547    |
| 16  | rs16939945 | 84502750 | T  | ADD  | 7373  | 0.8172 | 0.1074  | 0.6621  | 1.009 | -1.88    | 0.06014   |
| 16  | 84502870   | 84502870 | T  | ADD  | 7411  | 0.3115 | 1.236   | 0.02761 | 3.514 | -0.9434  | 0.3455    |
| 16  | 84502888   | 84502888 | C  | ADD  | 7411  | 0.3115 | 1.236   | 0.02761 | 3.514 | -0.9434  | 0.3455    |
| 16  | rs1519976  | 84503176 | G  | ADD  | 7390  | 1.107  | 0.03669 | 1.031   | 1.19  | 2.783    | 0.005388  |
| 16  | rs768410   | 84503229 | G  | ADD  | 7395  | 1.108  | 0.03669 | 1.031   | 1.19  | 2.785    | 0.005348  |
| 16  | rs147968   | 84503340 | C  | ADD  | 7383  | 1.106  | 0.03672 | 1.029   | 1.189 | 2.745    | 0.006054  |
| 16  | 84503481   | 84503481 | 0  | ADD  | 7410  | NA     | NA      | NA      | NA    | NA       | NA        |
| 16  | 84503489   | 84503489 | 0  | ADD  | 7355  | NA     | NA      | NA      | NA    | NA       | NA        |
| 16  | rs925994   | 84503518 | A  | ADD  | 7387  | 1.27   | 0.0924  | 1.06    | 1.522 | 2.586    | 0.009716  |
| 16  | rs12923978 | 84503825 | C  | ADD  | 7282  | 1.145  | 0.04343 | 1.051   | 1.246 | 3.113    | 0.001855  |
| 16  | rs424971   | 84503951 | C  | ADD  | 7346  | 1.101  | 0.03689 | 1.024   | 1.183 | 2.602    | 0.009264  |
| 16  | rs11649318 | 84503982 | C  | ADD  | 7397  | 1.116  | 0.03854 | 1.035   | 1.204 | 2.857    | 0.004273  |
| 16  | rs11863590 | 84503995 | G  | ADD  | 7289  | 1.146  | 0.04341 | 1.053   | 1.248 | 3.145    | 0.001661  |
| 16  | 84504494   | 84504494 | 0  | ADD  | 7392  | NA     | NA      | NA      | NA    | NA       | NA        |
| 16  | 84504502   | 84504502 | 0  | ADD  | 7405  | NA     | NA      | NA      | NA    | NA       | NA        |
| 16  | 84504605   | 84504605 | C  | ADD  | 7045  | 0.9335 | 0.05968 | 0.8304  | 1.049 | -1.153   | 0.2488    |
| 16  | 84504608   | 84504608 | T  | ADD  | 7404  | 1.021  | 0.6345  | 0.2943  | 3.54  | 0.03227  | 0.9743    |
| 16  | 84504790   | 84504790 | 0  | ADD  | 7413  | NA     | NA      | NA      | NA    | NA       | NA        |
| 16  | rs8051462  | 84504828 | G  | ADD  | 7382  | 1.104  | 0.0364  | 1.028   | 1.185 | 2.711    | 0.0067    |
| 16  | rs8064111  | 84504976 | T  | ADD  | 7291  | 1.249  | 0.115   | 0.9971  | 1.565 | 1.935    | 0.05299   |
| 16  | rs8047999  | 84505028 | C  | ADD  | 7397  | 1.097  | 0.03638 | 1.022   | 1.178 | 2.548    | 0.01083   |

| CHR | SNP        | BP       | A1 | TEST | NMISS | OR     | SE      | L95     | U95   | STAT    | P       |
|-----|------------|----------|----|------|-------|--------|---------|---------|-------|---------|---------|
| 16  | 84505065   | 84505065 | C  | ADD  | 7385  | 0.4846 | 1.287   | 0.03888 | 6.041 | -0.5628 | 0.5736  |
| 16  | 84505099   | 84505099 | O  | ADD  | 7413  | NA     | NA      | NA      | NA    | NA      | NA      |
| 16  | 84505252   | 84505252 | A  | ADD  | 7263  | 1.175  | 0.1866  | 0.8152  | 1.694 | 0.8651  | 0.387   |
| 16  | rs903202   | 84505280 | C  | ADD  | 7294  | 1.088  | 0.03634 | 1.013   | 1.169 | 2.328   | 0.01991 |
| 16  | rs13331970 | 84505479 | A  | ADD  | 7383  | 1.021  | 0.365   | 0.4991  | 2.087 | 0.05583 | 0.9555  |
| 16  | rs17444416 | 84505599 | A  | ADD  | 7402  | 0.9845 | 0.07373 | 0.8521  | 1.138 | -0.2112 | 0.8327  |
| 16  | 84505753   | 84505753 | G  | ADD  | 7398  | 1.023  | 0.6344  | 0.295   | 3.547 | 0.03577 | 0.9715  |
| 16  | rs11649271 | 84505830 | C  | ADD  | 7359  | 1.222  | 0.1226  | 0.9608  | 1.554 | 1.634   | 0.1024  |
| 16  | 84505980   | 84505980 | O  | ADD  | 7411  | NA     | NA      | NA      | NA    | NA      | NA      |
| 16  | rs903203   | 84506142 | A  | ADD  | 7036  | 1.081  | 0.03901 | 1.001   | 1.167 | 1.998   | 0.04572 |
| 16  | 84506417   | 84506417 | T  | ADD  | 7404  | 1.021  | 0.6345  | 0.2943  | 3.54  | 0.03227 | 0.9743  |
| 16  | rs403038   | 84506572 | A  | ADD  | 7405  | 1.182  | 0.1173  | 0.939   | 1.487 | 1.424   | 0.1545  |
| 16  | rs8054513  | 84506608 | G  | ADD  | 7393  | 1.228  | 0.1221  | 0.9666  | 1.56  | 1.682   | 0.09256 |
| 16  | rs8059127  | 84506690 | A  | ADD  | 7393  | 1.061  | 0.3288  | 0.5571  | 2.022 | 0.1811  | 0.8563  |
| 16  | rs62052557 | 84506707 | A  | ADD  | 6934  | 0.7161 | 0.4364  | 0.3044  | 1.684 | -0.7652 | 0.4442  |
| 16  | rs305071   | 84506772 | A  | ADD  | 7117  | 1.03   | 0.08755 | 0.8674  | 1.222 | 0.3347  | 0.7379  |
| 16  | rs28552575 | 84506805 | T  | ADD  | 7393  | 0.9242 | 0.3904  | 0.43    | 1.987 | -0.2018 | 0.84    |
| 16  | 84506880   | 84506880 | C  | ADD  | 7361  | 1.056  | 0.2351  | 0.6659  | 1.674 | 0.2307  | 0.8175  |
| 16  | rs305070   | 84506925 | G  | ADD  | 7401  | 1.132  | 0.1023  | 0.9264  | 1.383 | 1.212   | 0.2254  |
| 16  | rs9928776  | 84506960 | T  | ADD  | 7391  | 1.034  | 0.3862  | 0.4852  | 2.205 | 0.08763 | 0.9302  |
| 16  | rs16939967 | 84506974 | T  | ADD  | 7405  | 1.104  | 0.04642 | 1.008   | 1.209 | 2.124   | 0.03368 |
| 16  | rs305069   | 84507059 | C  | ADD  | 7247  | 1.091  | 0.03651 | 1.016   | 1.172 | 2.393   | 0.01672 |
| 16  | rs35819447 | 84507211 | G  | ADD  | 7110  | 1.461  | 1.083   | 0.1749  | 12.2  | 0.3501  | 0.7263  |
| 16  | 84507230   | 84507230 | O  | ADD  | 7413  | NA     | NA      | NA      | NA    | NA      | NA      |
| 16  | rs305068   | 84507397 | G  | ADD  | 7363  | 1.245  | 0.1228  | 0.9783  | 1.583 | 1.782   | 0.07481 |
| 16  | rs16939969 | 84507645 | C  | ADD  | 7400  | 0.9274 | 0.2998  | 0.5153  | 1.669 | -0.2513 | 0.8016  |
| 16  | rs28631400 | 84507948 | T  | ADD  | 7397  | 0.7972 | 0.3605  | 0.3933  | 1.616 | -0.6287 | 0.5295  |
| 16  | rs28407896 | 84507957 | T  | ADD  | 7397  | 0.7972 | 0.3605  | 0.3933  | 1.616 | -0.6287 | 0.5295  |
| 16  | 84508024   | 84508024 | O  | ADD  | 7413  | NA     | NA      | NA      | NA    | NA      | NA      |
| 16  | rs11117415 | 84508187 | G  | ADD  | 7399  | 1.203  | 0.07487 | 1.039   | 1.393 | 2.469   | 0.01356 |
| 16  | 84508204   | 84508204 | O  | ADD  | 7411  | NA     | NA      | NA      | NA    | NA      | NA      |
| 16  | rs4843860  | 84508422 | G  | ADD  | 7378  | 1.032  | 0.03922 | 0.9554  | 1.114 | 0.7969  | 0.4255  |
| 16  | rs4843861  | 84508477 | T  | ADD  | 7404  | 1.031  | 0.03912 | 0.9545  | 1.113 | 0.7703  | 0.4411  |
| 16  | rs9926067  | 84508696 | G  | ADD  | 7403  | 0.8212 | 0.316   | 0.4421  | 1.525 | -0.6236 | 0.5329  |
| 16  | rs12926854 | 84508759 | G  | ADD  | 7364  | 1.029  | 0.03921 | 0.9526  | 1.111 | 0.7215  | 0.4706  |
| 16  | rs8054065  | 84508855 | A  | ADD  | 7313  | 0.9304 | 0.03826 | 0.8632  | 1.003 | -1.886  | 0.05929 |
| 16  | 84508893   | 84508893 | O  | ADD  | 7277  | NA     | NA      | NA      | NA    | NA      | NA      |
| 16  | rs8046526  | 84509136 | T  | ADD  | 7413  | NA     | NA      | NA      | NA    | NA      | NA      |
| 16  | rs9934699  | 84509137 | A  | ADD  | 7360  | 1.17   | 0.06712 | 1.025   | 1.334 | 2.335   | 0.01956 |
| 16  | rs9934701  | 84509148 | A  | ADD  | 7360  | 1.17   | 0.06712 | 1.025   | 1.334 | 2.335   | 0.01956 |
| 16  | rs9926411  | 84509158 | G  | ADD  | 7406  | 1.133  | 0.1256  | 0.8862  | 1.45  | 0.9979  | 0.3183  |
| 16  | rs8058904  | 84509183 | G  | ADD  | 7390  | NA     | NA      | NA      | NA    | NA      | NA      |
| 16  | rs9924484  | 84509239 | G  | ADD  | 7364  | 1.184  | 0.06718 | 1.038   | 1.351 | 2.513   | 0.01196 |
| 16  | rs9924488  | 84509249 | G  | ADD  | 7356  | 1.029  | 0.03913 | 0.9533  | 1.111 | 0.7389  | 0.46    |
| 16  | rs8064189  | 84509297 | G  | ADD  | 7295  | 1.178  | 0.06655 | 1.034   | 1.342 | 2.465   | 0.01371 |
| 16  | 84509524   | 84509524 | O  | ADD  | 6692  | NA     | NA      | NA      | NA    | NA      | NA      |
| 16  | 84509646   | 84509646 | O  | ADD  | 7231  | NA     | NA      | NA      | NA    | NA      | NA      |
| 16  | rs28368114 | 84509781 | A  | ADD  | 7149  | 0.7758 | 0.5695  | 0.2541  | 2.369 | -0.4458 | 0.6557  |
| 16  | rs61995933 | 84509816 | T  | ADD  | 7355  | 2.519  | 1.283   | 0.2039  | 31.13 | 0.7202  | 0.4714  |
| 16  | 84510111   | 84510111 | O  | ADD  | 7413  | NA     | NA      | NA      | NA    | NA      | NA      |
| 16  | 84510173   | 84510173 | C  | ADD  | 7260  | 0.586  | 1.415   | 0.03656 | 9.392 | -0.3776 | 0.7057  |
| 16  | rs2280378  | 84510246 | G  | ADD  | 7371  | 1.099  | 0.03716 | 1.022   | 1.182 | 2.534   | 0.01129 |

| CHR | SNP        | BP       | A1 | TEST | NMISS | OR       | SE       | L95     | U95    | STAT       | P         |
|-----|------------|----------|----|------|-------|----------|----------|---------|--------|------------|-----------|
| 16  | rs7185022  | 84510430 | A  | ADD  | 7344  | 0.916    | 0.03731  | 0.8514  | 0.9855 | -2.35      | 0.01875   |
| 16  | rs13338943 | 84510452 | T  | ADD  | 7412  | 0.9386   | 0.05386  | 0.8446  | 1.043  | -1.176     | 0.2397    |
| 16  | rs12929551 | 84510511 | T  | ADD  | 7398  | 1.086    | 0.04624  | 0.9917  | 1.189  | 1.781      | 0.07495   |
| 16  | 84510613   | 84510613 | T  | ADD  | 7390  | 6.555    | 0.7992   | 1.368   | 31.4   | 2.352      | 0.01865   |
| 16  | rs16939994 | 84510669 | G  | ADD  | 7390  | 1.095    | 0.1309   | 0.8475  | 1.416  | 0.6953     | 0.4868    |
| 16  | rs8057456  | 84510697 | T  | ADD  | 7197  | 1.141    | 0.04102  | 1.053   | 1.237  | 3.217      | 0.001294  |
| 16  | 84510714   | 84510714 | C  | ADD  | 7352  | 2.28E-09 | 2.44E+04 | 0       | inf    | -0.0008162 | 0.9993    |
| 16  | 84510896   | 84510896 | A  | ADD  | 7051  | 0.9708   | 0.1329   | 0.7482  | 1.26   | -0.2228    | 0.8237    |
| 16  | 84510938   | 84510938 | O  | ADD  | 7382  | NA       | NA       | NA      | NA     | NA         | NA        |
| 16  | rs9927932  | 84510947 | T  | ADD  | 7412  | 1.434    | 0.3691   | 0.6953  | 2.955  | 0.9756     | 0.3293    |
| 16  | rs11866752 | 84510994 | T  | ADD  | 7403  | 1.511    | 0.4265   | 0.6548  | 3.485  | 0.9673     | 0.3334    |
| 16  | rs28368115 | 84511122 | T  | ADD  | 7379  | 1.031    | 0.1346   | 0.7921  | 1.343  | 0.2286     | 0.8191    |
| 16  | rs16940005 | 84511183 | C  | ADD  | 7353  | 1.105    | 0.04666  | 1.008   | 1.211  | 2.136      | 0.03268   |
| 16  | 84511331   | 84511331 | O  | ADD  | 7413  | NA       | NA       | NA      | NA     | NA         | NA        |
| 16  | rs35593615 | 84511410 | G  | ADD  | 7382  | 1.095    | 0.04631  | 0.9998  | 1.199  | 1.955      | 0.05053   |
| 16  | rs3751712  | 84511456 | C  | ADD  | 6737  | 1.122    | 0.04359  | 1.03    | 1.222  | 2.641      | 0.008277  |
| 16  | 84511483   | 84511483 | A  | ADD  | 5879  | 0.9093   | 0.2215   | 0.589   | 1.404  | -0.4292    | 0.6678    |
| 16  | rs4843321  | 84511577 | C  | ADD  | 7222  | 1.145    | 0.04278  | 1.053   | 1.245  | 3.158      | 0.001587  |
| 16  | 84511720   | 84511720 | G  | ADD  | 7408  | 8.247    | 1.108    | 0.9405  | 72.32  | 1.905      | 0.05684   |
| 16  | rs16940007 | 84511788 | T  | ADD  | 7408  | 3.89E-10 | 2.44E+04 | 0       | inf    | -0.0008888 | 0.9993    |
| 16  | rs16940009 | 84512089 | C  | ADD  | 7409  | 2.261    | 0.4914   | 0.8629  | 5.924  | 1.66       | 0.09691   |
| 16  | 84512224   | 84512224 | T  | ADD  | 7411  | 1.55E+09 | 2.44E+04 | 0       | inf    | 0.0008681  | 0.9993    |
| 16  | rs2270503  | 84512302 | A  | ADD  | 7404  | 0.3137   | 1.236    | 0.02782 | 3.537  | -0.9379    | 0.3483    |
| 16  | 84512462   | 84512462 | O  | ADD  | 7406  | NA       | NA       | NA      | NA     | NA         | NA        |
| 16  | 84512553   | 84512553 | O  | ADD  | 7411  | NA       | NA       | NA      | NA     | NA         | NA        |
| 16  | 84512648   | 84512648 | A  | ADD  | 7407  | 2.558    | 1.329    | 0.189   | 34.62  | 0.7065     | 0.4799    |
| 16  | rs28368116 | 84512695 | C  | ADD  | 7355  | 0.5754   | 0.2622   | 0.3442  | 0.9619 | -2.108     | 0.03502   |
| 16  | rs10514611 | 84512743 | T  | ADD  | 7352  | 1.197    | 0.07474  | 1.034   | 1.385  | 2.402      | 0.01631   |
| 16  | rs1568391  | 84512805 | G  | ADD  | 7110  | 0.9205   | 0.03863  | 0.8534  | 0.9929 | -2.144     | 0.03205   |
| 16  | rs305072   | 84513164 | G  | ADD  | 7397  | 0.9923   | 0.1261   | 0.775   | 1.271  | -0.0609    | 0.9514    |
| 16  | rs1044873  | 84513172 | A  | ADD  | 7266  | 1.144    | 0.04251  | 1.052   | 1.243  | 3.155      | 0.001607  |
| 16  | 84513230   | 84513230 | A  | ADD  | 7060  | 0.9133   | 0.03903  | 0.846   | 0.9859 | -2.324     | 0.02014   |
| 16  | 84513410   | 84513410 | G  | ADD  | 7403  | 0.3136   | 1.236    | 0.02781 | 3.536  | -0.9382    | 0.3481    |
| 16  | rs28368119 | 84513449 | T  | ADD  | 7137  | 0.6777   | 0.2176   | 0.4424  | 1.038  | -1.788     | 0.0738    |
| 16  | 84513495   | 84513495 | O  | ADD  | 7413  | NA       | NA       | NA      | NA     | NA         | NA        |
| 16  | rs6638     | 84513545 | A  | ADD  | 7053  | 0.92     | 0.039    | 0.8523  | 0.9931 | -2.138     | 0.03252   |
| 16  | 84513863   | 84513863 | C  | ADD  | 2111  | 1.045    | 0.07253  | 0.9064  | 1.205  | 0.6056     | 0.5448    |
| 16  | rs11646027 | 84513898 | C  | ADD  | 7380  | 1.211    | 0.07254  | 1.05    | 1.396  | 2.638      | 0.00833   |
| 16  | rs28368120 | 84514144 | T  | ADD  | 7398  | 1.046    | 0.1281   | 0.8139  | 1.345  | 0.3526     | 0.7244    |
| 16  | 84514396   | 84514396 | C  | ADD  | 7008  | 1.453    | 0.2041   | 0.9739  | 2.168  | 1.83       | 0.06719   |
| 16  | rs7204286  | 84514422 | T  | ADD  | 7266  | 1.2      | 0.07233  | 1.042   | 1.383  | 2.523      | 0.01163   |
| 16  | rs1021479  | 84514915 | C  | ADD  | 7394  | 1.066    | 0.1255   | 0.8338  | 1.364  | 0.5119     | 0.6087    |
| 16  | 84514923   | 84514923 | O  | ADD  | 7404  | NA       | NA       | NA      | NA     | NA         | NA        |
| 16  | rs305073   | 84515294 | T  | ADD  | 7301  | 1.157    | 0.0414   | 1.067   | 1.255  | 3.519      | 0.0004336 |
| 16  | rs305074   | 84515321 | C  | ADD  | 7305  | 1.16     | 0.0412   | 1.07    | 1.257  | 3.599      | 0.0003191 |
| 16  | rs9932835  | 84515425 | G  | ADD  | 7378  | 1.217    | 0.07235  | 1.056   | 1.403  | 2.718      | 0.006576  |
| 16  | rs11117416 | 84515825 | G  | ADD  | 7411  | 1.21     | 0.07163  | 1.052   | 1.393  | 2.664      | 0.007733  |
| 16  | 84516049   | 84516049 | O  | ADD  | 7304  | NA       | NA       | NA      | NA     | NA         | NA        |
| 16  | 84516201   | 84516201 | T  | ADD  | 7412  | 2.02E-09 | 2.44E+04 | 0       | inf    | -0.0008212 | 0.9993    |
| 16  | rs16940023 | 84516215 | T  | ADD  | 7397  | 1.034    | 0.1241   | 0.8106  | 1.318  | 0.2671     | 0.7894    |
| 16  | rs8052521  | 84516230 | A  | ADD  | 7401  | 1.163    | 0.06359  | 1.027   | 1.317  | 2.373      | 0.01762   |
| 16  | rs1021480  | 84516471 | G  | ADD  | 7322  | 1.2      | 0.06418  | 1.058   | 1.36   | 2.836      | 0.004575  |

| CHR | SNP        | BP       | A1 | TEST | NMISS | OR     | SE      | L95     | U95    | STAT    | P         |
|-----|------------|----------|----|------|-------|--------|---------|---------|--------|---------|-----------|
| 16  | rs1021481  | 84516521 | A  | ADD  | 7399  | 1.175  | 0.06359 | 1.037   | 1.331  | 2.537   | 0.01117   |
| 16  | rs880364   | 84516666 | G  | ADD  | 7406  | 1.183  | 0.06332 | 1.045   | 1.339  | 2.65    | 0.008041  |
| 16  | rs880365   | 84516863 | T  | ADD  | 7409  | 1.165  | 0.06311 | 1.03    | 1.319  | 2.426   | 0.01527   |
| 16  | rs880366   | 84516939 | C  | ADD  | 7408  | 1.172  | 0.06301 | 1.036   | 1.326  | 2.518   | 0.0118    |
| 16  | 84517038   | 84517038 | O  | ADD  | 7391  | NA     | NA      | NA      | NA     | NA      | NA        |
| 16  | 84517061   | 84517061 | O  | ADD  | 7385  | NA     | NA      | NA      | NA     | NA      | NA        |
| 16  | 84517099   | 84517099 | O  | ADD  | 7413  | NA     | NA      | NA      | NA     | NA      | NA        |
| 16  | rs305075   | 84517136 | T  | ADD  | 7399  | 0.9255 | 0.03789 | 0.8593  | 0.9969 | -2.043  | 0.04104   |
| 16  | 84517710   | 84517710 | O  | ADD  | 7409  | NA     | NA      | NA      | NA     | NA      | NA        |
| 16  | rs11644411 | 84517732 | C  | ADD  | 7335  | 1.223  | 0.07151 | 1.063   | 1.407  | 2.814   | 0.004896  |
| 16  | rs11648480 | 84517780 | T  | ADD  | 7350  | 1.234  | 0.07172 | 1.073   | 1.421  | 2.937   | 0.003311  |
| 16  | 84517870   | 84517870 | A  | ADD  | 7205  | 1.195  | 0.1323  | 0.9219  | 1.548  | 1.345   | 0.1785    |
| 16  | 84517901   | 84517901 | C  | ADD  | 7398  | 0.4459 | 0.5672  | 0.1467  | 1.355  | -1.424  | 0.1545    |
| 16  | rs1472235  | 84518468 | A  | ADD  | 7256  | 1.07   | 0.04512 | 0.9794  | 1.169  | 1.499   | 0.1339    |
| 16  | 84518535   | 84518535 | T  | ADD  | 6956  | 0.7408 | 0.5095  | 0.2729  | 2.011  | -0.5888 | 0.556     |
| 16  | rs1038953  | 84518591 | A  | ADD  | 6866  | 1.353  | 0.2557  | 0.8195  | 2.233  | 1.182   | 0.2374    |
| 16  | 84518682   | 84518682 | A  | ADD  | 7337  | 1.501  | 0.5041  | 0.559   | 4.032  | 0.8061  | 0.4202    |
| 16  | 84518866   | 84518866 | C  | ADD  | 7329  | 1.415  | 0.9588  | 0.216   | 9.263  | 0.3618  | 0.7175    |
| 16  | rs4843862  | 84518960 | G  | ADD  | 5568  | 0.916  | 0.04126 | 0.8448  | 0.9931 | -2.127  | 0.03344   |
| 16  | rs17444745 | 84519063 | A  | ADD  | 7408  | 0.9618 | 0.04645 | 0.8781  | 1.053  | -0.8394 | 0.4012    |
| 16  | 84519295   | 84519295 | T  | ADD  | 7411  | 8.25   | 1.108   | 0.9408  | 72.35  | 1.905   | 0.0568    |
| 16  | 84519403   | 84519403 | G  | ADD  | 7337  | 1.099  | 0.3267  | 0.5795  | 2.085  | 0.2898  | 0.772     |
| 16  | 84519498   | 84519498 | G  | ADD  | 7403  | 0.394  | 0.8916  | 0.06864 | 2.262  | -1.045  | 0.2962    |
| 16  | 84519800   | 84519800 | C  | ADD  | 7392  | 2.138  | 0.8594  | 0.3968  | 11.52  | 0.8843  | 0.3765    |
| 16  | rs305076   | 84519862 | C  | ADD  | 7389  | 6.406  | 1.15    | 0.6725  | 61.01  | 1.615   | 0.1063    |
| 16  | 84520081   | 84520081 | O  | ADD  | 7401  | NA     | NA      | NA      | NA     | NA      | NA        |
| 16  | 84520237   | 84520237 | C  | ADD  | 7400  | 1.756  | 1.157   | 0.182   | 16.94  | 0.4867  | 0.6265    |
| 16  | 84520351   | 84520351 | C  | ADD  | 6618  | 1.087  | 0.09599 | 0.9006  | 1.312  | 0.8692  | 0.3848    |
| 16  | 84520516   | 84520516 | A  | ADD  | 6603  | 1.087  | 0.09503 | 0.9019  | 1.309  | 0.8738  | 0.3822    |
| 16  | 84520518   | 84520518 | O  | ADD  | 7406  | NA     | NA      | NA      | NA     | NA      | NA        |
| 16  | 84520604   | 84520604 | O  | ADD  | 7413  | NA     | NA      | NA      | NA     | NA      | NA        |
| 16  | 84521376   | 84521376 | T  | ADD  | 7075  | 1.786  | 0.2909  | 1.01    | 3.16   | 1.994   | 0.04614   |
| 16  | 84521433   | 84521433 | O  | ADD  | 7413  | NA     | NA      | NA      | NA     | NA      | NA        |
| 16  | 84521580   | 84521580 | G  | ADD  | 7383  | 5.032  | 0.7995  | 1.05    | 24.12  | 2.021   | 0.04328   |
| 16  | 84521632   | 84521632 | T  | ADD  | 7314  | 0.6577 | 1.223   | 0.05988 | 7.224  | -0.3427 | 0.7318    |
| 16  | 84521737   | 84521737 | O  | ADD  | 7413  | NA     | NA      | NA      | NA     | NA      | NA        |
| 16  | rs12598785 | 84521809 | G  | ADD  | 7355  | 0.9831 | 0.05137 | 0.8889  | 1.087  | -0.332  | 0.7399    |
| 16  | rs60218704 | 84521854 | C  | ADD  | 7389  | 8.279  | 1.108   | 0.9435  | 72.65  | 1.908   | 0.05646   |
| 16  | rs8045988  | 84521891 | A  | ADD  | 7409  | 1.203  | 0.06516 | 1.058   | 1.366  | 2.832   | 0.004628  |
| 16  | rs366078   | 84522064 | C  | ADD  | 7389  | 0.8155 | 0.05168 | 0.7369  | 0.9024 | -3.947  | 7.90E-05  |
| 16  | rs2172625  | 84522286 | C  | ADD  | 7255  | 0.8019 | 0.05284 | 0.723   | 0.8893 | -4.179  | 2.92E-05  |
| 16  | rs2970094  | 84522327 | A  | ADD  | 6873  | 0.8154 | 0.05274 | 0.7353  | 0.9042 | -3.87   | 0.000109  |
| 16  | 84522420   | 84522420 | A  | ADD  | 7345  | 0.7122 | 1.422   | 0.04388 | 11.56  | -0.2387 | 0.8114    |
| 16  | 84522462   | 84522462 | O  | ADD  | 7402  | NA     | NA      | NA      | NA     | NA      | NA        |
| 16  | rs399280   | 84522499 | G  | ADD  | 7260  | 0.8436 | 0.05244 | 0.7612  | 0.9349 | -3.244  | 0.001179  |
| 16  | rs383425   | 84522540 | T  | ADD  | 7392  | 1.062  | 0.03653 | 0.9886  | 1.141  | 1.646   | 0.09983   |
| 16  | 84522577   | 84522577 | C  | ADD  | 7381  | 0.831  | 0.05252 | 0.7497  | 0.9211 | -3.525  | 0.0004237 |
| 16  | 84522585   | 84522585 | C  | ADD  | 7148  | 1.547  | 0.3663  | 0.7546  | 3.172  | 1.191   | 0.2335    |
| 16  | rs56200928 | 84522852 | C  | ADD  | 7096  | 1.615  | 0.1869  | 1.12    | 2.329  | 2.564   | 0.01035   |
| 16  | 84522867   | 84522867 | O  | ADD  | 7413  | NA     | NA      | NA      | NA     | NA      | NA        |
| 16  | 84522980   | 84522980 | A  | ADD  | 7399  | 1.6    | 1.557   | 0.07569 | 33.81  | 0.3019  | 0.7627    |
| 16  | rs523642   | 84523096 | A  | ADD  | 7369  | 0.8328 | 0.05256 | 0.7512  | 0.9231 | -3.482  | 0.0004986 |

| CHR | SNP        | BP       | A1 | TEST | NMISS | OR       | SE       | L95    | U95    | STAT     | P         |
|-----|------------|----------|----|------|-------|----------|----------|--------|--------|----------|-----------|
| 16  | rs524432   | 84523155 | C  | ADD  | 7410  | 0.8352   | 0.05212  | 0.7541 | 0.925  | -3.455   | 0.0005506 |
| 16  | 84523165   | 84523165 | A  | ADD  | 7403  | 0.5744   | 0.2839   | 0.3293 | 1.002  | -1.953   | 0.05082   |
| 16  | 84523216   | 84523216 | T  | ADD  | 7398  | 5.37E+09 | 2.44E+04 | 0      | inf    | 0.000919 | 0.9993    |
| 16  | rs388988   | 84523302 | T  | ADD  | 7349  | 0.8268   | 0.05226  | 0.7463 | 0.916  | -3.639   | 0.0002735 |
| 16  | 84523320   | 84523320 | O  | ADD  | 7406  | NA       | NA       | NA     | NA     | NA       | NA        |
| 16  | rs73266819 | 84523372 | C  | ADD  | 7402  | 0.9477   | 0.7953   | 0.1994 | 4.504  | -0.06759 | 0.9461    |
| 16  | 84523433   | 84523433 | C  | ADD  | 7144  | 0.8029   | 0.05505  | 0.7208 | 0.8944 | -3.988   | 6.67E-05  |
| 16  | rs411221   | 84523460 | C  | ADD  | 7235  | 0.8237   | 0.05285  | 0.7426 | 0.9135 | -3.671   | 0.0002415 |
| 16  | 84523472   | 84523472 | O  | ADD  | 7413  | NA       | NA       | NA     | NA     | NA       | NA        |
| 16  | 84523510   | 84523510 | O  | ADD  | 7404  | NA       | NA       | NA     | NA     | NA       | NA        |
| 16  | rs878453   | 84523664 | C  | ADD  | 7139  | 1.05     | 0.03746  | 0.9761 | 1.13   | 1.313    | 0.1892    |
| 16  | rs878454   | 84523673 | A  | ADD  | 7376  | 1.094    | 0.04347  | 1.005  | 1.192  | 2.074    | 0.03808   |
| 16  | rs903201   | 84523785 | C  | ADD  | 7319  | 0.9712   | 0.05247  | 0.8763 | 1.076  | -0.5567  | 0.5777    |
| 16  | rs11861479 | 84523794 | G  | ADD  | 7321  | 0.9707   | 0.05247  | 0.8758 | 1.076  | -0.5665  | 0.571     |
| 16  | rs11117417 | 84523830 | T  | ADD  | 7322  | 0.9743   | 0.05249  | 0.8791 | 1.08   | -0.4955  | 0.6203    |
| 16  | rs58980382 | 84523934 | T  | ADD  | 7128  | 0.7768   | 0.05584  | 0.6963 | 0.8667 | -4.522   | 6.11E-06  |
| 16  | rs11860480 | 84523959 | C  | ADD  | 7396  | 0.8727   | 0.03909  | 0.8083 | 0.9422 | -3.484   | 0.0004937 |
| 16  | rs11860517 | 84524000 | G  | ADD  | 7391  | 0.9821   | 0.05199  | 0.887  | 1.087  | -0.347   | 0.7286    |
| 16  | rs11117418 | 84524028 | G  | ADD  | 7389  | 0.9575   | 0.0492   | 0.8695 | 1.054  | -0.8824  | 0.3776    |
| 16  | rs12051539 | 84524038 | G  | ADD  | 7287  | 1.205    | 0.1513   | 0.8958 | 1.621  | 1.232    | 0.2178    |
| 16  | 84524043   | 84524043 | A  | ADD  | 7198  | 1.059    | 0.1237   | 0.831  | 1.35   | 0.4642   | 0.6425    |
| 16  | 84524049   | 84524049 | G  | ADD  | 7251  | 0.7827   | 0.05387  | 0.7043 | 0.8698 | -4.549   | 5.40E-06  |
| 16  | 84524139   | 84524139 | O  | ADD  | 7400  | NA       | NA       | NA     | NA     | NA       | NA        |
| 16  | rs13332649 | 84524184 | G  | ADD  | 7149  | 0.7962   | 0.04767  | 0.7252 | 0.8741 | -4.782   | 1.74E-06  |
| 16  | rs875529   | 84524187 | C  | ADD  | 7375  | 0.9772   | 0.05206  | 0.8825 | 1.082  | -0.4422  | 0.6584    |
| 16  | rs875528   | 84524211 | A  | ADD  | 7287  | 1.286    | 0.1486   | 0.9611 | 1.721  | 1.693    | 0.0904    |
| 16  | 84524220   | 84524220 | T  | ADD  | 7286  | 0.8999   | 0.1874   | 0.6233 | 1.299  | -0.5628  | 0.5736    |
| 16  | rs875527   | 84524231 | A  | ADD  | 7409  | 1.308    | 0.1492   | 0.9766 | 1.752  | 1.801    | 0.07164   |
| 16  | rs419030   | 84524302 | A  | ADD  | 7261  | 1.168    | 0.03861  | 1.083  | 1.26   | 4.019    | 5.84E-05  |
| 16  | 84524389   | 84524389 | O  | ADD  | 7412  | NA       | NA       | NA     | NA     | NA       | NA        |
| 16  | 84524454   | 84524454 | C  | ADD  | 7087  | 0.5878   | 0.8188   | 0.1181 | 2.925  | -0.649   | 0.5164    |
| 16  | 84524516   | 84524516 | C  | ADD  | 7403  | 1.495    | 0.6118   | 0.4508 | 4.96   | 0.6575   | 0.5108    |
| 16  | rs12596341 | 84524541 | A  | ADD  | 7383  | 0.9323   | 0.05621  | 0.835  | 1.041  | -1.247   | 0.2123    |
| 16  | rs7198271  | 84524586 | G  | ADD  | 7369  | 0.9418   | 0.5353   | 0.3299 | 2.689  | -0.112   | 0.9109    |
| 16  | 84524664   | 84524664 | C  | ADD  | 6888  | 1.133    | 0.03686  | 1.054  | 1.218  | 3.38     | 0.0007236 |
| 16  | 84524665   | 84524665 | C  | ADD  | 7228  | 1.132    | 0.03575  | 1.055  | 1.214  | 3.464    | 0.0005328 |
| 16  | 84524666   | 84524666 | C  | ADD  | 7228  | 1.132    | 0.03575  | 1.055  | 1.214  | 3.464    | 0.0005328 |
| 16  | 84524668   | 84524668 | C  | ADD  | 7194  | 1.135    | 0.03583  | 1.058  | 1.217  | 3.523    | 0.0004262 |
| 16  | 84524687   | 84524687 | C  | ADD  | 4226  | 0.8132   | 0.1398   | 0.6183 | 1.07   | -1.478   | 0.1393    |
| 16  | 84524706   | 84524706 | C  | ADD  | 3255  | 0.8982   | 0.09013  | 0.7528 | 1.072  | -1.191   | 0.2338    |
| 16  | 84524707   | 84524707 | C  | ADD  | 2841  | 0.8819   | 0.1188   | 0.6987 | 1.113  | -1.058   | 0.2901    |
| 16  | 84524722   | 84524722 | C  | ADD  | 6066  | 0.9115   | 0.2169   | 0.5958 | 1.394  | -0.4272  | 0.6692    |
| 16  | 84524723   | 84524723 | C  | ADD  | 6037  | 0.9124   | 0.2168   | 0.5965 | 1.396  | -0.4228  | 0.6724    |
| 16  | 84524750   | 84524750 | T  | ADD  | 7137  | 0.7399   | 0.1251   | 0.579  | 0.9454 | -2.409   | 0.01601   |
| 16  | rs12444221 | 84524786 | T  | ADD  | 7375  | 0.8069   | 0.04618  | 0.7371 | 0.8833 | -4.647   | 3.37E-06  |
| 16  | 84524997   | 84524997 | O  | ADD  | 7353  | NA       | NA       | NA     | NA     | NA       | NA        |
| 16  | rs437291   | 84525009 | C  | ADD  | 7338  | 1.148    | 0.03537  | 1.071  | 1.23   | 3.899    | 9.65E-05  |
| 16  | 84525054   | 84525054 | O  | ADD  | 7410  | NA       | NA       | NA     | NA     | NA       | NA        |
| 16  | 84525087   | 84525087 | T  | ADD  | 7087  | 1.676    | 0.3486   | 0.8465 | 3.319  | 1.482    | 0.1383    |
| 16  | rs9936079  | 84525095 | A  | ADD  | 7039  | 0.7975   | 0.04694  | 0.7274 | 0.8744 | -4.82    | 1.43E-06  |
| 16  | rs385344   | 84525105 | G  | ADD  | 7363  | 1.187    | 0.03845  | 1.101  | 1.28   | 4.454    | 8.45E-06  |
| 16  | rs447632   | 84525141 | G  | ADD  | 7392  | 1.135    | 0.03553  | 1.059  | 1.217  | 3.574    | 0.0003513 |

| CHR | SNP        | BP       | A1 | TEST | NMISS | OR       | SE       | L95     | U95    | STAT       | P         |
|-----|------------|----------|----|------|-------|----------|----------|---------|--------|------------|-----------|
| 16  | rs34337659 | 84525158 | C  | ADD  | 7388  | 1.185    | 0.03835  | 1.099   | 1.277  | 4.421      | 9.83E-06  |
| 16  | rs66509440 | 84525182 | T  | ADD  | 6947  | 1.209    | 0.04087  | 1.116   | 1.31   | 4.651      | 3.30E-06  |
| 16  | rs66804793 | 84525190 | A  | ADD  | 6948  | 1.21     | 0.04087  | 1.117   | 1.311  | 4.658      | 3.19E-06  |
| 16  | rs9925859  | 84525223 | C  | ADD  | 7365  | 0.9807   | 0.03664  | 0.9128  | 1.054  | -0.5307    | 0.5957    |
| 16  | rs74032085 | 84525245 | C  | ADD  | 6799  | 1.227    | 0.04167  | 1.131   | 1.331  | 4.909      | 9.17E-07  |
| 16  | rs16940044 | 84525266 | G  | ADD  | 6779  | 1.228    | 0.04186  | 1.132   | 1.333  | 4.915      | 8.87E-07  |
| 16  | 84525360   | 84525360 | G  | ADD  | 7260  | 4.64E-10 | 2.44E+04 | 0       | inf    | -0.0008816 | 0.9993    |
| 16  | rs2934497  | 84525379 | T  | ADD  | 6755  | 1.25     | 0.04226  | 1.15    | 1.358  | 5.273      | 1.34E-07  |
| 16  | rs2970091  | 84525387 | A  | ADD  | 6841  | 1.243    | 0.04174  | 1.146   | 1.349  | 5.219      | 1.80E-07  |
| 16  | rs2970090  | 84525392 | A  | ADD  | 6824  | 1.18     | 0.03736  | 1.097   | 1.27   | 4.431      | 9.36E-06  |
| 16  | rs56239618 | 84525421 | G  | ADD  | 6813  | 1.16     | 0.04869  | 1.054   | 1.276  | 3.048      | 0.002306  |
| 16  | rs57439018 | 84525761 | C  | ADD  | 7392  | 0.9453   | 0.7954   | 0.1989  | 4.494  | -0.0707    | 0.9436    |
| 16  | 84525770   | 84525770 | A  | ADD  | 7407  | 1.33E+09 | 1.41E+04 | 0       | inf    | 0.001495   | 0.9988    |
| 16  | rs2934498  | 84525783 | G  | ADD  | 7401  | 1.192    | 0.03839  | 1.105   | 1.285  | 4.571      | 4.85E-06  |
| 16  | rs447919   | 84526058 | T  | ADD  | 7374  | 0.9816   | 0.03668  | 0.9135  | 1.055  | -0.5059    | 0.6129    |
| 16  | 84526080   | 84526080 | O  | ADD  | 7408  | NA       | NA       | NA      | NA     | NA         | NA        |
| 16  | 84526134   | 84526134 | O  | ADD  | 7401  | NA       | NA       | NA      | NA     | NA         | NA        |
| 16  | rs439885   | 84526175 | A  | ADD  | 7406  | 1.185    | 0.03837  | 1.099   | 1.278  | 4.432      | 9.35E-06  |
| 16  | rs10400953 | 84526344 | T  | ADD  | 7382  | 0.9841   | 0.05218  | 0.8884  | 1.09   | -0.3073    | 0.7586    |
| 16  | 84526382   | 84526382 | T  | ADD  | 7401  | 7.89E-10 | 1.59E+04 | 0       | inf    | -0.001315  | 0.999     |
| 16  | rs450443   | 84526392 | G  | ADD  | 7370  | 1.19     | 0.03843  | 1.104   | 1.283  | 4.531      | 5.88E-06  |
| 16  | rs396987   | 84526435 | G  | ADD  | 7368  | 1.191    | 0.03844  | 1.105   | 1.284  | 4.549      | 5.39E-06  |
| 16  | rs385989   | 84526509 | G  | ADD  | 7313  | 1.14     | 0.03533  | 1.063   | 1.221  | 3.697      | 0.0002184 |
| 16  | 84526528   | 84526528 | A  | ADD  | 7339  | 0.9232   | 0.2816   | 0.5316  | 1.603  | -0.2839    | 0.7765    |
| 16  | rs4843865  | 84526806 | T  | ADD  | 7390  | 0.8136   | 0.04604  | 0.7434  | 0.8904 | -4.48      | 7.45E-06  |
| 16  | 84527141   | 84527141 | C  | ADD  | 7395  | 0.8139   | 0.04601  | 0.7437  | 0.8907 | -4.476     | 7.60E-06  |
| 16  | rs8052690  | 84527239 | G  | ADD  | 7407  | 0.8175   | 0.04598  | 0.747   | 0.8945 | -4.384     | 1.17E-05  |
| 16  | rs7185692  | 84527553 | G  | ADD  | 7372  | 0.9799   | 0.05228  | 0.8845  | 1.086  | -0.3881    | 0.6979    |
| 16  | 84527600   | 84527600 | C  | ADD  | 3054  | 1.141    | 0.07062  | 0.9931  | 1.31   | 1.862      | 0.0626    |
| 16  | 84527601   | 84527601 | A  | ADD  | 5811  | 0.9221   | 0.04127  | 0.8504  | 0.9998 | -1.965     | 0.04938   |
| 16  | 84527603   | 84527603 | C  | ADD  | 4202  | 1.032    | 0.05015  | 0.935   | 1.138  | 0.6206     | 0.5349    |
| 16  | 84527612   | 84527612 | C  | ADD  | 7090  | 2.01     | 0.3877   | 0.94    | 4.296  | 1.8        | 0.0718    |
| 16  | 84527613   | 84527613 | T  | ADD  | 6761  | 1.518    | 0.3362   | 0.7854  | 2.934  | 1.242      | 0.2144    |
| 16  | 84527727   | 84527727 | O  | ADD  | 7286  | NA       | NA       | NA      | NA     | NA         | NA        |
| 16  | 84527829   | 84527829 | C  | ADD  | 7295  | 1.197    | 0.5205   | 0.4316  | 3.32   | 0.3454     | 0.7298    |
| 16  | rs8059144  | 84527977 | C  | ADD  | 7353  | 0.8603   | 0.03789  | 0.7988  | 0.9267 | -3.97      | 7.19E-05  |
| 16  | rs8045825  | 84527979 | G  | ADD  | 7358  | 0.8611   | 0.03787  | 0.7995  | 0.9275 | -3.948     | 7.90E-05  |
| 16  | 84528014   | 84528014 | G  | ADD  | 7405  | 3.89E-10 | 2.44E+04 | 0       | inf    | -0.0008888 | 0.9993    |
| 16  | 84528020   | 84528020 | T  | ADD  | 7369  | 0.5233   | 0.5737   | 0.17    | 1.611  | -1.129     | 0.2591    |
| 16  | rs4843866  | 84528151 | T  | ADD  | 7361  | 0.8607   | 0.03786  | 0.7992  | 0.927  | -3.963     | 7.41E-05  |
| 16  | rs4843867  | 84528219 | G  | ADD  | 7363  | 0.8607   | 0.03785  | 0.7992  | 0.927  | -3.963     | 7.42E-05  |
| 16  | 84528233   | 84528233 | A  | ADD  | 7406  | 0.1474   | 1.093    | 0.01729 | 1.256  | -1.752     | 0.07981   |
| 16  | rs186249   | 84528397 | C  | ADD  | 7222  | 1.186    | 0.03914  | 1.099   | 1.281  | 4.364      | 1.28E-05  |
| 16  | 84528620   | 84528620 | O  | ADD  | 7413  | NA       | NA       | NA      | NA     | NA         | NA        |
| 16  | 84528669   | 84528669 | O  | ADD  | 7392  | NA       | NA       | NA      | NA     | NA         | NA        |
| 16  | rs12149636 | 84528721 | G  | ADD  | 7383  | 0.8561   | 0.03789  | 0.7948  | 0.9221 | -4.1       | 4.13E-05  |
| 16  | 84528857   | 84528857 | C  | ADD  | 7176  | 0.8577   | 0.03948  | 0.7938  | 0.9267 | -3.889     | 0.0001007 |
| 16  | 84528860   | 84528860 | T  | ADD  | 6360  | 0.7765   | 0.06064  | 0.6895  | 0.8745 | -4.171     | 3.04E-05  |
| 16  | rs12149642 | 84528922 | T  | ADD  | 7092  | 0.8437   | 0.03985  | 0.7803  | 0.9122 | -4.265     | 2.00E-05  |
| 16  | 84529014   | 84529014 | G  | ADD  | 7010  | 0.8062   | 0.138    | 0.6152  | 1.057  | -1.561     | 0.1184    |
| 16  | 84529016   | 84529016 | C  | ADD  | 3196  | 0.8462   | 0.0803   | 0.7229  | 0.9904 | -2.08      | 0.03748   |
| 16  | 84529025   | 84529025 | C  | ADD  | 5464  | 0.9374   | 0.07968  | 0.8018  | 1.096  | -0.8117    | 0.417     |

| CHR | SNP        | BP       | A1 | TEST | NMISS | OR       | SE       | L95     | U95    | STAT      | P         |
|-----|------------|----------|----|------|-------|----------|----------|---------|--------|-----------|-----------|
| 16  | 84529026   | 84529026 | C  | ADD  | 5926  | 0.8484   | 0.06182  | 0.7516  | 0.9577 | -2.659    | 0.007844  |
| 16  | 84529027   | 84529027 | C  | ADD  | 6516  | 0.8412   | 0.04561  | 0.7693  | 0.9199 | -3.79     | 0.0001505 |
| 16  | 84529028   | 84529028 | C  | ADD  | 6384  | 0.8543   | 0.04359  | 0.7844  | 0.9305 | -3.612    | 0.0003035 |
| 16  | 84529029   | 84529029 | C  | ADD  | 6688  | 0.8389   | 0.04083  | 0.7744  | 0.9088 | -4.302    | 1.69E-05  |
| 16  | 84529030   | 84529030 | C  | ADD  | 6688  | 0.8389   | 0.04083  | 0.7744  | 0.9088 | -4.302    | 1.69E-05  |
| 16  | 84529031   | 84529031 | C  | ADD  | 6386  | 0.8279   | 0.0412   | 0.7636  | 0.8975 | -4.585    | 4.55E-06  |
| 16  | rs12149223 | 84529032 | C  | ADD  | 5796  | 0.9384   | 0.1235   | 0.7367  | 1.195  | -0.5147   | 0.6068    |
| 16  | 84529037   | 84529037 | C  | ADD  | 6978  | 0.843    | 0.2248   | 0.5427  | 1.31   | -0.7598   | 0.4473    |
| 16  | 84529038   | 84529038 | C  | ADD  | 7041  | 1.316    | 0.3554   | 0.6557  | 2.641  | 0.7727    | 0.4397    |
| 16  | 84529220   | 84529220 | T  | ADD  | 7096  | 1.027    | 0.1458   | 0.7713  | 1.366  | 0.1795    | 0.8576    |
| 16  | 84529277   | 84529277 | O  | ADD  | 7413  | NA       | NA       | NA      | NA     | NA        | NA        |
| 16  | rs305067   | 84529341 | C  | ADD  | 6767  | 0.9831   | 0.03883  | 0.9111  | 1.061  | -0.4381   | 0.6613    |
| 16  | rs11117419 | 84529383 | G  | ADD  | 7375  | 0.8485   | 0.0393   | 0.7856  | 0.9164 | -4.181    | 2.90E-05  |
| 16  | rs11117420 | 84529423 | C  | ADD  | 7151  | 0.824    | 0.04862  | 0.7491  | 0.9064 | -3.981    | 6.87E-05  |
| 16  | rs11117421 | 84529461 | A  | ADD  | 7374  | 0.848    | 0.0393   | 0.7852  | 0.9159 | -4.195    | 2.73E-05  |
| 16  | rs11117422 | 84529514 | C  | ADD  | 7295  | 0.7957   | 0.04655  | 0.7263  | 0.8717 | -4.909    | 9.16E-07  |
| 16  | 84529575   | 84529575 | O  | ADD  | 7338  | NA       | NA       | NA      | NA     | NA        | NA        |
| 16  | rs11117423 | 84529682 | C  | ADD  | 7340  | 0.8479   | 0.03948  | 0.7847  | 0.9161 | -4.18     | 2.92E-05  |
| 16  | rs11117424 | 84529738 | G  | ADD  | 7396  | 0.8491   | 0.03925  | 0.7862  | 0.917  | -4.168    | 3.08E-05  |
| 16  | rs11117425 | 84529772 | T  | ADD  | 7398  | 0.8511   | 0.03935  | 0.7879  | 0.9193 | -4.097    | 4.18E-05  |
| 16  | rs11648012 | 84529908 | T  | ADD  | 7391  | 0.8499   | 0.03925  | 0.7869  | 0.9178 | -4.145    | 3.40E-05  |
| 16  | 84530040   | 84530040 | T  | ADD  | 7398  | 0.8109   | 1.416    | 0.05052 | 13.02  | -0.148    | 0.8823    |
| 16  | rs11643999 | 84530070 | A  | ADD  | 7399  | 0.8481   | 0.03926  | 0.7853  | 0.9159 | -4.198    | 2.70E-05  |
| 16  | rs11648084 | 84530099 | T  | ADD  | 7408  | 0.85     | 0.03928  | 0.787   | 0.918  | -4.137    | 3.51E-05  |
| 16  | rs11644034 | 84530113 | A  | ADD  | 7357  | 0.8039   | 0.04641  | 0.734   | 0.8805 | -4.703    | 2.56E-06  |
| 16  | rs16940083 | 84530130 | T  | ADD  | 7404  | 0.7397   | 0.766    | 0.1648  | 3.32   | -0.3937   | 0.6938    |
| 16  | 84530187   | 84530187 | O  | ADD  | 7252  | NA       | NA       | NA      | NA     | NA        | NA        |
| 16  | rs305066   | 84530277 | T  | ADD  | 7320  | 1.184    | 0.03777  | 1.099   | 1.275  | 4.467     | 7.93E-06  |
| 16  | rs12600127 | 84530280 | G  | ADD  | 7353  | 0.8469   | 0.03937  | 0.784   | 0.9148 | -4.222    | 2.43E-05  |
| 16  | rs13335265 | 84530311 | C  | ADD  | 6998  | 0.7895   | 0.04777  | 0.719   | 0.867  | -4.947    | 7.53E-07  |
| 16  | 84530325   | 84530325 | O  | ADD  | 7353  | NA       | NA       | NA      | NA     | NA        | NA        |
| 16  | 84530431   | 84530431 | G  | ADD  | 7403  | 7.90E-10 | 1.59E+04 | 0       | inf    | -0.001315 | 0.999     |
| 16  | rs62051023 | 84530439 | T  | ADD  | 7372  | 1.292    | 0.1661   | 0.9331  | 1.789  | 1.543     | 0.1229    |
| 16  | 84530468   | 84530468 | T  | ADD  | 7373  | 0.5107   | 1.312    | 0.039   | 6.687  | -0.5121   | 0.6086    |
| 16  | rs8062669  | 84530493 | T  | ADD  | 7399  | 1.014    | 0.08777  | 0.8536  | 1.204  | 0.157     | 0.8752    |
| 16  | rs12711490 | 84530529 | C  | ADD  | 7403  | 0.8035   | 0.0462   | 0.734   | 0.8797 | -4.734    | 2.20E-06  |
| 16  | 84530554   | 84530554 | C  | ADD  | 7405  | 1.625    | 0.743    | 0.3788  | 6.972  | 0.6534    | 0.5135    |
| 16  | rs12598434 | 84530560 | T  | ADD  | 7358  | 0.8557   | 0.03937  | 0.7921  | 0.9243 | -3.959    | 7.53E-05  |
| 16  | rs11641153 | 84530641 | G  | ADD  | 7365  | 0.7928   | 0.04653  | 0.7237  | 0.8685 | -4.991    | 6.02E-07  |
| 16  | rs11641155 | 84530653 | G  | ADD  | 7364  | 0.7923   | 0.04654  | 0.7232  | 0.868  | -5.003    | 5.64E-07  |
| 16  | rs7205434  | 84530696 | G  | ADD  | 7364  | 0.7923   | 0.04654  | 0.7232  | 0.868  | -5.003    | 5.64E-07  |
| 16  | rs8050476  | 84530705 | G  | ADD  | 7411  | 0.9839   | 0.08586  | 0.8315  | 1.164  | -0.1886   | 0.8504    |
| 16  | rs4843868  | 84530902 | T  | ADD  | 7352  | 0.7906   | 0.04659  | 0.7216  | 0.8662 | -5.044    | 4.55E-07  |
| 16  | 84530967   | 84530967 | T  | ADD  | 7387  | 0.9608   | 0.1071   | 0.7789  | 1.185  | -0.3739   | 0.7085    |
| 16  | rs1879213  | 84530977 | T  | ADD  | 7373  | 0.9771   | 0.05815  | 0.8719  | 1.095  | -0.398    | 0.6906    |
| 16  | rs56250418 | 84530999 | T  | ADD  | 7126  | 1.136    | 0.04499  | 1.04    | 1.241  | 2.84      | 0.004509  |
| 16  | rs305065   | 84531367 | G  | ADD  | 7349  | 0.9855   | 0.03652  | 0.9174  | 1.059  | -0.4      | 0.6891    |
| 16  | 84531390   | 84531390 | C  | ADD  | 7314  | 0.9596   | 0.2721   | 0.5629  | 1.636  | -0.1517   | 0.8794    |
| 16  | rs305064   | 84531643 | T  | ADD  | 7347  | 0.991    | 0.03667  | 0.9223  | 1.065  | -0.2456   | 0.806     |
| 16  | rs9927123  | 84531682 | G  | ADD  | 7372  | 0.8574   | 0.03766  | 0.7964  | 0.923  | -4.087    | 4.37E-05  |
| 16  | rs16940087 | 84531752 | T  | ADD  | 7404  | 0.7397   | 0.766    | 0.1648  | 3.32   | -0.3937   | 0.6938    |
| 16  | rs16940088 | 84531870 | T  | ADD  | 7364  | 0.9797   | 0.05824  | 0.874   | 1.098  | -0.3514   | 0.7253    |

| CHR | SNP        | BP       | A1 | TEST | NMISS | OR     | SE      | L95     | U95    | STAT     | P         |
|-----|------------|----------|----|------|-------|--------|---------|---------|--------|----------|-----------|
| 16  | rs13330932 | 84532008 | T  | ADD  | 7319  | 0.8243 | 0.04003 | 0.7621  | 0.8916 | -4.827   | 1.38E-06  |
| 16  | 84532040   | 84532040 | T  | ADD  | 7374  | 0.5105 | 1.312   | 0.03899 | 6.684  | -0.5124  | 0.6084    |
| 16  | rs305063   | 84532158 | T  | ADD  | 7070  | 1.169  | 0.03838 | 1.084   | 1.261  | 4.074    | 4.63E-05  |
| 16  | 84532198   | 84532198 | O  | ADD  | 7397  | NA     | NA      | NA      | NA     | NA       | NA        |
| 16  | rs56834409 | 84532277 | G  | ADD  | 7365  | 0.9805 | 0.05825 | 0.8747  | 1.099  | -0.3384  | 0.7351    |
| 16  | 84532342   | 84532342 | C  | ADD  | 4992  | 0.9711 | 0.08294 | 0.8254  | 1.143  | -0.3531  | 0.724     |
| 16  | rs4843322  | 84532386 | G  | ADD  | 7368  | 0.8422 | 0.03931 | 0.7797  | 0.9096 | -4.371   | 1.24E-05  |
| 16  | rs4843323  | 84532462 | T  | ADD  | 7342  | 0.7892 | 0.0467  | 0.7201  | 0.8648 | -5.07    | 3.98E-07  |
| 16  | rs12596291 | 84532538 | C  | ADD  | 7361  | 0.9787 | 0.05829 | 0.873   | 1.097  | -0.3692  | 0.712     |
| 16  | rs12596295 | 84532576 | A  | ADD  | 7360  | 0.9252 | 0.06287 | 0.8179  | 1.046  | -1.237   | 0.216     |
| 16  | rs4843869  | 84532642 | A  | ADD  | 7353  | 0.7889 | 0.04663 | 0.72    | 0.8644 | -5.086   | 3.66E-07  |
| 16  | 84532733   | 84532733 | O  | ADD  | 7252  | NA     | NA      | NA      | NA     | NA       | NA        |
| 16  | 84532800   | 84532800 | G  | ADD  | 7130  | 1.23   | 0.4525  | 0.5068  | 2.987  | 0.4581   | 0.6469    |
| 16  | 84532862   | 84532862 | O  | ADD  | 7116  | NA     | NA      | NA      | NA     | NA       | NA        |
| 16  | rs305062   | 84533003 | G  | ADD  | 7408  | 1.259  | 0.1751  | 0.8931  | 1.774  | 1.314    | 0.1888    |
| 16  | rs305061   | 84533160 | C  | ADD  | 7388  | 0.9887 | 0.03685 | 0.9198  | 1.063  | -0.3084  | 0.7578    |
| 16  | 84533416   | 84533416 | C  | ADD  | 4305  | 1.186  | 0.07073 | 1.032   | 1.362  | 2.407    | 0.01608   |
| 16  | rs305060   | 84533417 | C  | ADD  | 7365  | 1.146  | 0.03472 | 1.071   | 1.227  | 3.936    | 8.30E-05  |
| 16  | rs16940099 | 84533441 | C  | ADD  | 7378  | 0.9827 | 0.08898 | 0.8254  | 1.17   | -0.1965  | 0.8443    |
| 16  | rs16940100 | 84533460 | T  | ADD  | 7393  | 0.9941 | 0.08782 | 0.8369  | 1.181  | -0.06693 | 0.9466    |
| 16  | 84533481   | 84533481 | O  | ADD  | 7411  | NA     | NA      | NA      | NA     | NA       | NA        |
| 16  | rs305059   | 84533519 | A  | ADD  | 7177  | 1.142  | 0.03516 | 1.066   | 1.223  | 3.769    | 0.0001637 |
| 16  | 84533526   | 84533526 | O  | ADD  | 7406  | NA     | NA      | NA      | NA     | NA       | NA        |
| 16  | 84533672   | 84533672 | T  | ADD  | 7393  | 0.9941 | 0.08782 | 0.8369  | 1.181  | -0.06693 | 0.9466    |
| 16  | 84533804   | 84533804 | C  | ADD  | 7392  | 0.9941 | 0.08782 | 0.8369  | 1.181  | -0.06761 | 0.9461    |
| 16  | 84533839   | 84533839 | O  | ADD  | 7268  | NA     | NA      | NA      | NA     | NA       | NA        |
| 16  | 84533939   | 84533939 | C  | ADD  | 7241  | 0.9972 | 0.08815 | 0.839   | 1.185  | -0.03165 | 0.9748    |
| 16  | 84534522   | 84534522 | G  | ADD  | 7325  | 1.121  | 0.2243  | 0.7223  | 1.74   | 0.5095   | 0.6104    |
| 16  | 84534632   | 84534632 | C  | ADD  | 7408  | 1.068  | 0.7995  | 0.2229  | 5.118  | 0.08234  | 0.9344    |
| 16  | 84534741   | 84534741 | T  | ADD  | 7282  | 1.196  | 0.5204  | 0.4312  | 3.316  | 0.3436   | 0.7312    |
| 16  | rs7202472  | 84535003 | T  | ADD  | 7364  | 0.7899 | 0.04793 | 0.7191  | 0.8677 | -4.921   | 8.63E-07  |
| 16  | 84535111   | 84535111 | T  | ADD  | 7273  | 0.9295 | 0.203   | 0.6244  | 1.384  | -0.3602  | 0.7187    |
| 16  | 84535271   | 84535271 | A  | ADD  | 7379  | 0.3124 | 0.8398  | 0.06024 | 1.62   | -1.385   | 0.166     |
| 16  | 84535272   | 84535272 | A  | ADD  | 7396  | 0.1918 | 1.124   | 0.0212  | 1.735  | -1.47    | 0.1416    |
| 16  | rs305097   | 84535412 | A  | ADD  | 7309  | 1.189  | 0.03834 | 1.103   | 1.282  | 4.525    | 6.05E-06  |
| 16  | rs62051024 | 84535456 | C  | ADD  | 7112  | 1.135  | 0.04495 | 1.04    | 1.24   | 2.825    | 0.004728  |
| 16  | rs305095   | 84535500 | T  | ADD  | 7379  | 1.19   | 0.03823 | 1.104   | 1.283  | 4.553    | 5.28E-06  |
| 16  | rs305094   | 84535606 | C  | ADD  | 7354  | 0.9915 | 0.03695 | 0.9223  | 1.066  | -0.2303  | 0.8178    |
| 16  | rs72807020 | 84535618 | G  | ADD  | 7348  | 0.9289 | 0.05654 | 0.8314  | 1.038  | -1.305   | 0.1917    |
| 16  | rs16940101 | 84535626 | G  | ADD  | 7410  | 0.9816 | 0.08621 | 0.829   | 1.162  | -0.2157  | 0.8292    |
| 16  | rs16940103 | 84535710 | T  | ADD  | 7347  | 0.9209 | 0.0566  | 0.8242  | 1.029  | -1.457   | 0.1452    |
| 16  | rs16940104 | 84535711 | T  | ADD  | 7392  | 0.9762 | 0.08776 | 0.822   | 1.159  | -0.2741  | 0.784     |
| 16  | rs7186094  | 84535988 | T  | ADD  | 7401  | 0.9842 | 0.05203 | 0.8887  | 1.09   | -0.307   | 0.7589    |
| 16  | rs7190319  | 84536046 | G  | ADD  | 7408  | 0.9881 | 0.05205 | 0.8923  | 1.094  | -0.2295  | 0.8185    |
| 16  | rs305093   | 84536086 | T  | ADD  | 7376  | 0.9904 | 0.03694 | 0.9213  | 1.065  | -0.2599  | 0.795     |
| 16  | 84536244   | 84536244 | O  | ADD  | 7403  | NA     | NA      | NA      | NA     | NA       | NA        |
| 16  | rs11639990 | 84536305 | G  | ADD  | 7409  | 0.9888 | 0.05198 | 0.8931  | 1.095  | -0.2158  | 0.8291    |
| 16  | 84536585   | 84536585 | O  | ADD  | 7319  | NA     | NA      | NA      | NA     | NA       | NA        |
| 16  | 84536608   | 84536608 | C  | ADD  | 7378  | 2.776  | 0.5044  | 1.033   | 7.462  | 2.024    | 0.04295   |
| 16  | rs305092   | 84536618 | A  | ADD  | 7349  | 0.9905 | 0.03652 | 0.922   | 1.064  | -0.2627  | 0.7928    |
| 16  | rs305091   | 84536744 | A  | ADD  | 7369  | 0.9852 | 0.03627 | 0.9176  | 1.058  | -0.4117  | 0.6806    |
| 16  | 84536846   | 84536846 | C  | ADD  | 3172  | 1.016  | 0.06614 | 0.8927  | 1.157  | 0.2435   | 0.8076    |



| CHR | SNP        | BP       | A1 | TEST | NMISS | OR       | SE       | L95     | U95    | STAT       | P        |
|-----|------------|----------|----|------|-------|----------|----------|---------|--------|------------|----------|
| 16  | rs305090   | 84536847 | T  | ADD  | 7357  | 0.9917   | 0.03636  | 0.9234  | 1.065  | -0.2305    | 0.8177   |
| 16  | 84536862   | 84536862 | A  | ADD  | 7407  | 2.151    | 0.5622   | 0.7146  | 6.473  | 1.362      | 0.1731   |
| 16  | 84537033   | 84537033 | T  | ADD  | 7349  | 5.28E-10 | 2.44E+04 | 0       | inf    | -0.0008762 | 0.9993   |
| 16  | 84537070   | 84537070 | T  | ADD  | 7381  | 0.341    | 0.8484   | 0.06464 | 1.798  | -1.268     | 0.2047   |
| 16  | 84537135   | 84537135 | O  | ADD  | 7367  | NA       | NA       | NA      | NA     | NA         | NA       |
| 16  | 84537212   | 84537212 | A  | ADD  | 7399  | 7.89E-10 | 1.59E+04 | 0       | inf    | -0.001315  | 0.999    |
| 16  | 84537309   | 84537309 | O  | ADD  | 7402  | NA       | NA       | NA      | NA     | NA         | NA       |
| 16  | rs11641591 | 84537652 | T  | ADD  | 7356  | 1.298    | 0.1788   | 0.9139  | 1.842  | 1.456      | 0.1453   |
| 16  | rs62051025 | 84537707 | T  | ADD  | 6966  | 1.146    | 0.04352  | 1.052   | 1.248  | 3.129      | 0.001752 |
| 16  | rs965773   | 84537847 | A  | ADD  | 7355  | 1.025    | 0.03579  | 0.9556  | 1.1    | 0.6911     | 0.4895   |
| 16  | rs16940113 | 84537948 | T  | ADD  | 7405  | 1.133    | 0.8681   | 0.2066  | 6.209  | 0.1435     | 0.8859   |
| 16  | 84538025   | 84538025 | G  | ADD  | 7370  | 1.036    | 0.09396  | 0.8621  | 1.246  | 0.3803     | 0.7037   |
| 16  | rs731708   | 84538035 | A  | ADD  | 7317  | 0.79     | 0.04788  | 0.7192  | 0.8677 | -4.924     | 8.50E-07 |
| 16  | 84538040   | 84538040 | T  | ADD  | 7107  | 0.6532   | 0.2575   | 0.3944  | 1.082  | -1.654     | 0.09811  |
| 16  | rs731709   | 84538088 | C  | ADD  | 7377  | 1.177    | 0.03809  | 1.092   | 1.268  | 4.275      | 1.91E-05 |
| 16  | 84538106   | 84538106 | T  | ADD  | 7092  | 1.106    | 0.2496   | 0.6779  | 1.804  | 0.4026     | 0.6872   |
| 16  | 84538380   | 84538380 | O  | ADD  | 7386  | NA       | NA       | NA      | NA     | NA         | NA       |
| 16  | rs731707   | 84538469 | C  | ADD  | 7358  | 1.025    | 0.03572  | 0.9559  | 1.1    | 0.6982     | 0.4851   |
| 16  | 84538530   | 84538530 | A  | ADD  | 7379  | 0.8875   | 1.063    | 0.1105  | 7.127  | -0.1123    | 0.9106   |
| 16  | rs305089   | 84538531 | T  | ADD  | 7384  | 0.9858   | 0.03705  | 0.9168  | 1.06   | -0.3862    | 0.6993   |
| 16  | 84538676   | 84538676 | O  | ADD  | 7380  | NA       | NA       | NA      | NA     | NA         | NA       |
| 16  | 84538740   | 84538740 | T  | ADD  | 7299  | 0.5705   | 1.015    | 0.07812 | 4.167  | -0.5531    | 0.5802   |
| 16  | 84538942   | 84538942 | G  | ADD  | 7101  | 1.07     | 0.2015   | 0.7207  | 1.588  | 0.3346     | 0.738    |
| 16  | 84538944   | 84538944 | T  | ADD  | 7393  | 3.81E-10 | 1.72E+04 | 0       | inf    | -0.001258  | 0.999    |
| 16  | rs11643168 | 84538983 | T  | ADD  | 7352  | 1.055    | 0.06862  | 0.9223  | 1.207  | 0.7817     | 0.4344   |
| 16  | rs305088   | 84539102 | T  | ADD  | 7339  | 0.9932   | 0.03751  | 0.9228  | 1.069  | -0.181     | 0.8564   |
| 16  | 84539195   | 84539195 | C  | ADD  | 7411  | 1.55E+09 | 2.44E+04 | 0       | inf    | 0.000868   | 0.9993   |
| 16  | 84539211   | 84539211 | C  | ADD  | 7395  | 1.336    | 1.225    | 0.121   | 14.75  | 0.2365     | 0.813    |
| 16  | 84539306   | 84539306 | A  | ADD  | 6374  | 1.11     | 0.08826  | 0.9333  | 1.319  | 1.177      | 0.239    |
| 16  | rs305087   | 84539747 | C  | ADD  | 6996  | 0.8855   | 0.05456  | 0.7957  | 0.9855 | -2.228     | 0.02586  |
| 16  | rs7198504  | 84539802 | C  | ADD  | 6859  | 0.9202   | 0.04176  | 0.8479  | 0.9987 | -1.992     | 0.04641  |
| 16  | rs9935237  | 84540017 | G  | ADD  | 6266  | 0.7227   | 0.3446   | 0.3678  | 1.42   | -0.9427    | 0.3458   |
| 16  | rs305086   | 84540022 | A  | ADD  | 7407  | 1.051    | 0.04803  | 0.9562  | 1.154  | 1.027      | 0.3042   |
| 16  | rs8053060  | 84540490 | A  | ADD  | 5077  | 1.095    | 0.05007  | 0.9926  | 1.208  | 1.812      | 0.06994  |
| 16  | 84540536   | 84540536 | O  | ADD  | 7413  | NA       | NA       | NA      | NA     | NA         | NA       |
| 16  | 84540547   | 84540547 | O  | ADD  | 7413  | NA       | NA       | NA      | NA     | NA         | NA       |
| 16  | rs6540234  | 84540557 | T  | ADD  | 7357  | 0.9903   | 0.03779  | 0.9196  | 1.066  | -0.2593    | 0.7954   |
| 16  | rs8049187  | 84540779 | T  | ADD  | 5095  | 1.11     | 0.04157  | 1.023   | 1.204  | 2.501      | 0.01238  |
| 16  | rs8062690  | 84540827 | G  | ADD  | 5029  | 0.8677   | 0.05113  | 0.7849  | 0.9591 | -2.776     | 0.005508 |
| 16  | rs8053604  | 84540842 | T  | ADD  | 4320  | 1.101    | 0.04514  | 1.008   | 1.203  | 2.131      | 0.03311  |
| 16  | 84541049   | 84541049 | G  | ADD  | 7400  | 3.88E-10 | 2.44E+04 | 0       | inf    | -0.0008889 | 0.9993   |
| 16  | 84541077   | 84541077 | O  | ADD  | 7084  | NA       | NA       | NA      | NA     | NA         | NA       |
| 16  | 84541142   | 84541142 | G  | ADD  | 7410  | 3.89E-10 | 2.44E+04 | 0       | inf    | -0.0008888 | 0.9993   |
| 16  | 84541177   | 84541177 | C  | ADD  | 4198  | 0.8964   | 0.04622  | 0.8188  | 0.9814 | -2.366     | 0.01798  |
| 16  | 84541179   | 84541179 | T  | ADD  | 4197  | 0.8975   | 0.04623  | 0.8198  | 0.9827 | -2.338     | 0.01939  |
| 16  | 84541180   | 84541180 | C  | ADD  | 4197  | 0.8975   | 0.04623  | 0.8198  | 0.9827 | -2.338     | 0.01939  |
| 16  | rs2361768  | 84541181 | G  | ADD  | 4197  | 0.8975   | 0.04623  | 0.8198  | 0.9827 | -2.338     | 0.01939  |
| 16  | 84541385   | 84541385 | A  | ADD  | 7401  | 3.89E-10 | 2.44E+04 | 0       | inf    | -0.0008889 | 0.9993   |
| 16  | 84541450   | 84541450 | G  | ADD  | 7361  | 0.6885   | 1.416    | 0.0429  | 11.05  | -0.2636    | 0.7921   |
| 16  | rs55739703 | 84541492 | G  | ADD  | 7345  | 0.9057   | 0.1152   | 0.7227  | 1.135  | -0.8604    | 0.3895   |
| 16  | rs870614   | 84541516 | A  | ADD  | 5859  | 0.9526   | 0.05517  | 0.855   | 1.061  | -0.8794    | 0.3792   |
| 16  | rs8047292  | 84541556 | T  | ADD  | 7409  | 0.5919   | 0.4923   | 0.2255  | 1.553  | -1.065     | 0.2868   |

| CHR | SNP        | BP       | A1 | TEST | NMISS | OR       | SE       | L95     | U95   | STAT       | P      |
|-----|------------|----------|----|------|-------|----------|----------|---------|-------|------------|--------|
| 16  | rs908988   | 84542101 | G  | ADD  | 7382  | 0.9863   | 0.03737  | 0.9166  | 1.061 | -0.3695    | 0.7117 |
| 16  | rs8060078  | 84542153 | T  | ADD  | 7391  | 1.994    | 0.5883   | 0.6295  | 6.316 | 1.173      | 0.2408 |
| 16  | rs908987   | 84542390 | T  | ADD  | 6982  | 0.9909   | 0.03832  | 0.9192  | 1.068 | -0.2382    | 0.8117 |
| 16  | rs908986   | 84542429 | G  | ADD  | 7385  | 1.003    | 0.03782  | 0.9311  | 1.08  | 0.07212    | 0.9425 |
| 16  | rs908985   | 84542503 | T  | ADD  | 7388  | 1.001    | 0.03781  | 0.9291  | 1.078 | 0.01588    | 0.9873 |
| 16  | 84542511   | 84542511 | A  | ADD  | 7387  | 0.8433   | 0.6229   | 0.2487  | 2.859 | -0.2737    | 0.7844 |
| 16  | rs908984   | 84542530 | T  | ADD  | 7407  | 1.003    | 0.0378   | 0.931   | 1.08  | 0.06846    | 0.9454 |
| 16  | rs57670691 | 84542583 | A  | ADD  | 7360  | 0.8757   | 0.11     | 0.7058  | 1.086 | -1.206     | 0.2277 |
| 16  | rs57396687 | 84542701 | A  | ADD  | 7365  | 0.8927   | 0.1112   | 0.7179  | 1.11  | -1.02      | 0.3077 |
| 16  | rs1915034  | 84542858 | A  | ADD  | 7397  | 1.012    | 0.03879  | 0.9381  | 1.092 | 0.3137     | 0.7537 |
| 16  | rs4240807  | 84542862 | A  | ADD  | 7382  | 1.015    | 0.03881  | 0.9403  | 1.095 | 0.3751     | 0.7076 |
| 16  | rs1915033  | 84542932 | A  | ADD  | 7366  | 1.003    | 0.03784  | 0.9312  | 1.08  | 0.07556    | 0.9398 |
| 16  | 84542936   | 84542936 | T  | ADD  | 7409  | 3.90E-10 | 2.44E+04 | 0       | inf   | -0.0008887 | 0.9993 |
| 16  | 84542966   | 84542966 | C  | ADD  | 7409  | 3.90E-10 | 2.44E+04 | 0       | inf   | -0.0008887 | 0.9993 |
| 16  | rs4843871  | 84543036 | G  | ADD  | 7361  | 0.9944   | 0.03753  | 0.9238  | 1.07  | -0.1508    | 0.8801 |
| 16  | rs4843872  | 84543172 | A  | ADD  | 7392  | 0.9999   | 0.03778  | 0.9285  | 1.077 | -0.003036  | 0.9976 |
| 16  | 84543226   | 84543226 | A  | ADD  | 7412  | 6.79E+08 | 2.44E+04 | 0       | inf   | 0.0008342  | 0.9993 |
| 16  | rs10863201 | 84543272 | C  | ADD  | 7144  | 0.9934   | 0.03793  | 0.9222  | 1.07  | -0.1745    | 0.8614 |
| 16  | rs58073431 | 84543416 | C  | ADD  | 7365  | 0.8798   | 0.1115   | 0.7071  | 1.095 | -1.149     | 0.2507 |
| 16  | rs59821663 | 84543420 | A  | ADD  | 7365  | 0.8798   | 0.1115   | 0.7071  | 1.095 | -1.149     | 0.2507 |
| 16  | 84543445   | 84543445 | O  | ADD  | 7406  | NA       | NA       | NA      | NA    | NA         | NA     |
| 16  | 84543446   | 84543446 | O  | ADD  | 7406  | NA       | NA       | NA      | NA    | NA         | NA     |
| 16  | rs59403904 | 84543458 | T  | ADD  | 7276  | 0.9929   | 0.1332   | 0.7647  | 1.289 | -0.0537    | 0.9572 |
| 16  | 84543506   | 84543506 | O  | ADD  | 7413  | NA       | NA       | NA      | NA    | NA         | NA     |
| 16  | 84543518   | 84543518 | O  | ADD  | 7413  | NA       | NA       | NA      | NA    | NA         | NA     |
| 16  | rs58189590 | 84543560 | A  | ADD  | 7358  | 0.8739   | 0.1113   | 0.7026  | 1.087 | -1.211     | 0.2258 |
| 16  | rs57426547 | 84543596 | T  | ADD  | 7358  | 0.8739   | 0.1113   | 0.7026  | 1.087 | -1.211     | 0.2258 |
| 16  | 84543660   | 84543660 | O  | ADD  | 7413  | NA       | NA       | NA      | NA    | NA         | NA     |
| 16  | rs73268906 | 84544188 | G  | ADD  | 7360  | 0.88     | 0.1115   | 0.7073  | 1.095 | -1.146     | 0.2517 |
| 16  | rs73268908 | 84544290 | A  | ADD  | 7369  | 0.8853   | 0.1117   | 0.7113  | 1.102 | -1.091     | 0.2754 |
| 16  | rs73268912 | 84544401 | A  | ADD  | 7364  | 0.8937   | 0.1114   | 0.7184  | 1.112 | -1.009     | 0.3128 |
| 16  | 84544635   | 84544635 | T  | ADD  | 7367  | 0.5598   | 0.6655   | 0.1519  | 2.063 | -0.8718    | 0.3833 |
| 16  | 84544641   | 84544641 | O  | ADD  | 7411  | NA       | NA       | NA      | NA    | NA         | NA     |
| 16  | 84544743   | 84544743 | G  | ADD  | 7409  | 3.90E-10 | 2.44E+04 | 0       | inf   | -0.0008887 | 0.9993 |
| 16  | rs59120392 | 84544797 | T  | ADD  | 7372  | 0.8897   | 0.1115   | 0.7151  | 1.107 | -1.048     | 0.2948 |
| 16  | rs57278440 | 84544999 | C  | ADD  | 7373  | 0.8895   | 0.1115   | 0.7149  | 1.107 | -1.05      | 0.2937 |
| 16  | rs10863202 | 84545499 | A  | ADD  | 7280  | 1.001    | 0.03771  | 0.9297  | 1.078 | 0.02651    | 0.9789 |
| 16  | rs8060960  | 84545861 | T  | ADD  | 7357  | 0.9885   | 0.03795  | 0.9176  | 1.065 | -0.3058    | 0.7597 |
| 16  | rs8048151  | 84546099 | C  | ADD  | 7342  | 1.007    | 0.03853  | 0.934   | 1.086 | 0.1865     | 0.8521 |
| 16  | 84546166   | 84546166 | A  | ADD  | 7370  | 0.5187   | 0.895    | 0.08977 | 2.997 | -0.7334    | 0.4633 |
| 16  | 84546175   | 84546175 | A  | ADD  | 7409  | 3.90E-10 | 2.44E+04 | 0       | inf   | -0.0008887 | 0.9993 |
| 16  | rs73268923 | 84546268 | T  | ADD  | 7372  | 0.8983   | 0.1118   | 0.7215  | 1.118 | -0.9595    | 0.3373 |
| 16  | 84546359   | 84546359 | A  | ADD  | 7366  | 0.8874   | 0.1114   | 0.7133  | 1.104 | -1.072     | 0.2835 |
| 16  | rs6540235  | 84546396 | T  | ADD  | 7367  | 1.003    | 0.03758  | 0.9314  | 1.079 | 0.06791    | 0.9459 |
| 16  | 84546553   | 84546553 | O  | ADD  | 7386  | NA       | NA       | NA      | NA    | NA         | NA     |
| 16  | rs7186247  | 84546570 | T  | ADD  | 7353  | 0.9986   | 0.03759  | 0.9277  | 1.075 | -0.03655   | 0.9708 |
| 16  | 84546654   | 84546654 | G  | ADD  | 7319  | 0.9577   | 0.4594   | 0.3892  | 2.357 | -0.09408   | 0.925  |
| 16  | rs7199472  | 84546685 | G  | ADD  | 7402  | 0.9925   | 0.0375   | 0.9222  | 1.068 | -0.1995    | 0.8419 |
| 16  | rs11640143 | 84546965 | C  | ADD  | 7383  | 0.8969   | 0.07158  | 0.7795  | 1.032 | -1.52      | 0.1285 |
| 16  | 84547130   | 84547130 | T  | ADD  | 7341  | 1.394    | 1.472    | 0.07782 | 24.96 | 0.2255     | 0.8216 |
| 16  | 84547216   | 84547216 | T  | ADD  | 7413  | 1.755    | 1.157    | 0.1819  | 16.93 | 0.4863     | 0.6267 |
| 16  | rs4843873  | 84547276 | A  | ADD  | 7383  | 1.019    | 0.03828  | 0.9456  | 1.099 | 0.4973     | 0.619  |

| CHR | SNP        | BP       | A1 | TEST | NMISS | OR       | SE       | L95     | U95    | STAT       | P        |
|-----|------------|----------|----|------|-------|----------|----------|---------|--------|------------|----------|
| 16  | 84547352   | 84547352 | A  | ADD  | 7318  | 1.758    | 0.3814   | 0.8327  | 3.714  | 1.48       | 0.1389   |
| 16  | rs4843874  | 84547399 | C  | ADD  | 7389  | 1.01     | 0.03821  | 0.9369  | 1.088  | 0.2526     | 0.8006   |
| 16  | rs4843875  | 84547443 | T  | ADD  | 5803  | 1.079    | 0.05553  | 0.9676  | 1.203  | 1.367      | 0.1716   |
| 16  | 84547570   | 84547570 | O  | ADD  | 7413  | NA       | NA       | NA      | NA     | NA         | NA       |
| 16  | 84547601   | 84547601 | C  | ADD  | 7371  | 0.519    | 0.895    | 0.08982 | 2.999  | -0.7327    | 0.4637   |
| 16  | rs73268928 | 84547653 | G  | ADD  | 7354  | 0.9123   | 0.1137   | 0.73    | 1.14   | -0.8066    | 0.4199   |
| 16  | 84547657   | 84547657 | O  | ADD  | 7383  | NA       | NA       | NA      | NA     | NA         | NA       |
| 16  | rs11117426 | 84547768 | C  | ADD  | 7321  | 0.8646   | 0.04634  | 0.7895  | 0.9468 | -3.139     | 0.001694 |
| 16  | 84547926   | 84547926 | C  | ADD  | 7411  | 3.89E-10 | 2.44E+04 | 0       | inf    | -0.0008888 | 0.9993   |
| 16  | rs11117427 | 84548058 | A  | ADD  | 7280  | 0.8679   | 0.04688  | 0.7917  | 0.9515 | -3.021     | 0.002518 |
| 16  | rs925992   | 84548081 | T  | ADD  | 7178  | 1.008    | 0.03898  | 0.9342  | 1.088  | 0.2148     | 0.8299   |
| 16  | 84548374   | 84548374 | T  | ADD  | 7412  | 3.89E-10 | 2.44E+04 | 0       | inf    | -0.0008888 | 0.9993   |
| 16  | 84548382   | 84548382 | C  | ADD  | 7337  | 0.3554   | 0.7201   | 0.08664 | 1.457  | -1.437     | 0.1508   |
| 16  | rs8057009  | 84548424 | G  | ADD  | 7400  | 1.014    | 0.03997  | 0.9377  | 1.097  | 0.3505     | 0.726    |
| 16  | rs6540236  | 84548591 | A  | ADD  | 7305  | 1.017    | 0.03866  | 0.943   | 1.097  | 0.4409     | 0.6593   |
| 16  | rs12445476 | 84548770 | G  | ADD  | 7409  | 0.8615   | 0.04649  | 0.7864  | 0.9436 | -3.208     | 0.001337 |
| 16  | 84548866   | 84548866 | G  | ADD  | 7405  | 9.092    | 1.095    | 1.064   | 77.69  | 2.017      | 0.04374  |
| 16  | 84548901   | 84548901 | T  | ADD  | 5843  | 0.9362   | 0.1084   | 0.757   | 1.158  | -0.6088    | 0.5426   |
| 16  | rs7185590  | 84549154 | A  | ADD  | 7365  | 1.402    | 0.3355   | 0.7264  | 2.706  | 1.007      | 0.3137   |
| 16  | rs11642873 | 84549206 | C  | ADD  | 7348  | 0.864    | 0.04724  | 0.7876  | 0.9478 | -3.094     | 0.001976 |
| 16  | 84549320   | 84549320 | C  | ADD  | 6344  | 0.6814   | 0.2339   | 0.4309  | 1.078  | -1.64      | 0.101    |
| 16  | rs6540238  | 84549328 | A  | ADD  | 7266  | 1.016    | 0.03865  | 0.9423  | 1.096  | 0.4219     | 0.6731   |
| 16  | rs12444486 | 84550150 | C  | ADD  | 7310  | 0.9203   | 0.03494  | 0.8594  | 0.9855 | -2.377     | 0.01746  |
| 16  | rs4843876  | 84550233 | T  | ADD  | 7403  | 1.009    | 0.03795  | 0.9366  | 1.087  | 0.2348     | 0.8144   |
| 16  | rs11117428 | 84550330 | C  | ADD  | 7118  | 1.041    | 0.04221  | 0.9581  | 1.131  | 0.9469     | 0.3437   |
| 16  | rs2361764  | 84550459 | G  | ADD  | 7276  | 1.011    | 0.03821  | 0.9381  | 1.09   | 0.2874     | 0.7738   |
| 16  | 84550594   | 84550594 | O  | ADD  | 7413  | NA       | NA       | NA      | NA     | NA         | NA       |
| 16  | rs2361763  | 84550635 | T  | ADD  | 7325  | 0.9707   | 0.03506  | 0.9063  | 1.04   | -0.8473    | 0.3968   |
| 16  | rs2885364  | 84550691 | A  | ADD  | 7305  | 1.009    | 0.03813  | 0.9363  | 1.087  | 0.2326     | 0.816    |
| 16  | rs4843877  | 84550733 | C  | ADD  | 7288  | 0.9987   | 0.03818  | 0.9267  | 1.076  | -0.0349    | 0.9722   |
| 16  | rs35929052 | 84551985 | T  | ADD  | 7101  | 0.8372   | 0.05922  | 0.7454  | 0.9402 | -3.001     | 0.002689 |
| 16  | rs908983   | 84552021 | C  | ADD  | 7402  | 1.022    | 0.03752  | 0.9495  | 1.1    | 0.5779     | 0.5633   |
| 16  | rs883332   | 84552225 | C  | ADD  | 7410  | 1.129    | 0.2193   | 0.7349  | 1.736  | 0.5552     | 0.5788   |
| 16  | rs34347181 | 84552262 | O  | ADD  | 7411  | NA       | NA       | NA      | NA     | NA         | NA       |
| 16  | rs2049086  | 84552380 | T  | ADD  | 7130  | 1.007    | 0.03836  | 0.9343  | 1.086  | 0.1892     | 0.8499   |
| 16  | rs908982   | 84552384 | A  | ADD  | 7149  | 1.007    | 0.03821  | 0.9339  | 1.085  | 0.1699     | 0.8651   |
| 16  | 84552424   | 84552424 | O  | ADD  | 7413  | NA       | NA       | NA      | NA     | NA         | NA       |
| 16  | rs8044852  | 84552728 | A  | ADD  | 7308  | 0.9948   | 0.03738  | 0.9245  | 1.07   | -0.1406    | 0.8882   |
| 16  | rs908981   | 84552926 | T  | ADD  | 7394  | 1        | 0.03719  | 0.9297  | 1.076  | 0.0001883  | 0.9998   |
| 16  | 84552937   | 84552937 | C  | ADD  | 6941  | 0.8556   | 0.07813  | 0.7341  | 0.9972 | -1.996     | 0.04596  |
| 16  | rs12446139 | 84553085 | G  | ADD  | 7394  | 1        | 0.03719  | 0.9297  | 1.076  | 0.0001883  | 0.9998   |
| 16  | 84553110   | 84553110 | C  | ADD  | 7334  | 0.9239   | 0.1172   | 0.7343  | 1.162  | -0.6756    | 0.4993   |
| 16  | rs12919427 | 84553160 | A  | ADD  | 7394  | 1        | 0.03719  | 0.9297  | 1.076  | 0.0001883  | 0.9998   |
| 16  | rs12930405 | 84553163 | C  | ADD  | 7394  | 1        | 0.03719  | 0.9297  | 1.076  | 0.0001883  | 0.9998   |
| 16  | rs11642456 | 84553581 | T  | ADD  | 7393  | 1        | 0.0372   | 0.93    | 1.076  | 0.009215   | 0.9926   |
| 16  | 84553752   | 84553752 | T  | ADD  | 7366  | 0.6895   | 1.416    | 0.04296 | 11.07  | -0.2626    | 0.7929   |
| 16  | rs11649461 | 84553758 | C  | ADD  | 7164  | 0.9958   | 0.03737  | 0.9255  | 1.072  | -0.1114    | 0.9113   |
| 16  | 84553776   | 84553776 | T  | ADD  | 7401  | 1.16     | 0.6871   | 0.3017  | 4.459  | 0.216      | 0.829    |
| 16  | rs11645398 | 84553796 | G  | ADD  | 7249  | 1.005    | 0.03781  | 0.9336  | 1.083  | 0.144      | 0.8855   |
| 16  | 84554094   | 84554094 | C  | ADD  | 7409  | 4.37E-10 | 2.44E+04 | 0       | inf    | -0.000884  | 0.9993   |
| 16  | rs4843324  | 84554392 | O  | ADD  | 7399  | NA       | NA       | NA      | NA     | NA         | NA       |
| 16  | rs11643829 | 84554502 | C  | ADD  | 4808  | 1.016    | 0.045    | 0.9305  | 1.11   | 0.3591     | 0.7195   |

| CHR | SNP        | BP       | A1 | TEST | NMISS | OR       | SE       | L95     | U95    | STAT       | P         |
|-----|------------|----------|----|------|-------|----------|----------|---------|--------|------------|-----------|
| 16  | rs35615495 | 84554505 | T  | ADD  | 5326  | 0.9305   | 0.06131  | 0.8252  | 1.049  | -1.174     | 0.2403    |
| 16  | rs11640586 | 84554529 | C  | ADD  | 4394  | 1.142    | 0.04768  | 1.04    | 1.254  | 2.789      | 0.005284  |
| 16  | rs59015387 | 84554628 | A  | ADD  | 7404  | 3.89E-10 | 2.44E+04 | 0       | inf    | -0.0008888 | 0.9993    |
| 16  | 84554776   | 84554776 | T  | ADD  | 7345  | 2.249    | 0.9249   | 0.367   | 13.78  | 0.8763     | 0.3809    |
| 16  | rs12019053 | 84554782 | G  | ADD  | 5180  | 0.9231   | 0.06148  | 0.8183  | 1.041  | -1.302     | 0.193     |
| 16  | 84554944   | 84554944 | C  | ADD  | 4027  | 0.9926   | 0.05059  | 0.8989  | 1.096  | -0.1464    | 0.8836    |
| 16  | 84554954   | 84554954 | C  | ADD  | 3611  | 0.9776   | 0.0575   | 0.8734  | 1.094  | -0.3941    | 0.6935    |
| 16  | rs11860050 | 84555097 | A  | ADD  | 5245  | 0.9251   | 0.06193  | 0.8194  | 1.045  | -1.256     | 0.209     |
| 16  | 84555268   | 84555268 | O  | ADD  | 7412  | NA       | NA       | NA      | NA     | NA         | NA        |
| 16  | rs12446834 | 84555541 | C  | ADD  | 4686  | 0.9913   | 0.04476  | 0.908   | 1.082  | -0.1951    | 0.8453    |
| 16  | rs55906426 | 84555779 | C  | ADD  | 6262  | 1.05     | 0.0452   | 0.9612  | 1.148  | 1.085      | 0.2778    |
| 16  | rs12019051 | 84555863 | G  | ADD  | 4683  | 0.9919   | 0.04477  | 0.9085  | 1.083  | -0.1826    | 0.8551    |
| 16  | 84555917   | 84555917 | O  | ADD  | 7398  | NA       | NA       | NA      | NA     | NA         | NA        |
| 16  | 84556011   | 84556011 | O  | ADD  | 7403  | NA       | NA       | NA      | NA     | NA         | NA        |
| 16  | rs16940146 | 84556487 | G  | ADD  | 7405  | 8.253    | 1.108    | 0.9411  | 72.36  | 1.905      | 0.05676   |
| 16  | 84556512   | 84556512 | O  | ADD  | 7412  | NA       | NA       | NA      | NA     | NA         | NA        |
| 16  | rs34445961 | 84556804 | G  | ADD  | 4040  | 1.059    | 0.04977  | 0.9602  | 1.167  | 1.144      | 0.2525    |
| 16  | rs34256051 | 84556806 | C  | ADD  | 4065  | 1.044    | 0.04936  | 0.9479  | 1.15   | 0.8763     | 0.3809    |
| 16  | 84556855   | 84556855 | T  | ADD  | 7400  | 8.41E-10 | 1.65E+04 | 0       | inf    | -0.001269  | 0.999     |
| 16  | rs62051883 | 84556897 | A  | ADD  | 7212  | 1.04     | 0.3424   | 0.5316  | 2.034  | 0.1143     | 0.909     |
| 16  | rs59276136 | 84556910 | A  | ADD  | 4598  | 0.9906   | 0.04522  | 0.9066  | 1.082  | -0.2079    | 0.8353    |
| 16  | 84557150   | 84557150 | O  | ADD  | 7405  | NA       | NA       | NA      | NA     | NA         | NA        |
| 16  | rs11863308 | 84557298 | T  | ADD  | 7404  | 3.89E-10 | 2.44E+04 | 0       | inf    | -0.0008888 | 0.9993    |
| 16  | 84557332   | 84557332 | C  | ADD  | 7074  | 0.7307   | 0.3564   | 0.3634  | 1.469  | -0.8802    | 0.3787    |
| 16  | 84557466   | 84557466 | G  | ADD  | 7404  | 5.05E-10 | 1.18E+04 | 0       | inf    | -0.001813  | 0.9986    |
| 16  | rs12598292 | 84557532 | T  | ADD  | 5639  | 0.9376   | 0.2311   | 0.5961  | 1.475  | -0.279     | 0.7802    |
| 16  | rs8053185  | 84557593 | G  | ADD  | 4418  | 0.9915   | 0.04649  | 0.9052  | 1.086  | -0.1829    | 0.8549    |
| 16  | rs12446659 | 84557863 | T  | ADD  | 4370  | 0.9826   | 0.04681  | 0.8964  | 1.077  | -0.3755    | 0.7073    |
| 16  | rs35867147 | 84557883 | A  | ADD  | 5241  | 0.9179   | 0.06306  | 0.8112  | 1.039  | -1.358     | 0.1746    |
| 16  | 84557898   | 84557898 | O  | ADD  | 7389  | NA       | NA       | NA      | NA     | NA         | NA        |
| 16  | rs12446684 | 84557908 | T  | ADD  | 4395  | 0.9886   | 0.04662  | 0.9023  | 1.083  | -0.2451    | 0.8064    |
| 16  | rs12444385 | 84557964 | A  | ADD  | 4366  | 0.9818   | 0.04683  | 0.8957  | 1.076  | -0.3919    | 0.6951    |
| 16  | 84558091   | 84558091 | C  | ADD  | 4364  | 0.9824   | 0.04683  | 0.8963  | 1.077  | -0.3782    | 0.7053    |
| 16  | rs9924246  | 84558107 | C  | ADD  | 4364  | 0.9824   | 0.04683  | 0.8963  | 1.077  | -0.3782    | 0.7053    |
| 16  | 84558180   | 84558180 | C  | ADD  | 3191  | 0.9946   | 0.05534  | 0.8923  | 1.109  | -0.09856   | 0.9215    |
| 16  | 84558188   | 84558188 | C  | ADD  | 3823  | 1.015    | 0.0508   | 0.9187  | 1.121  | 0.2906     | 0.7714    |
| 16  | rs9926350  | 84558192 | A  | ADD  | 2493  | 1.13     | 0.06286  | 0.9992  | 1.278  | 1.947      | 0.05156   |
| 16  | rs9934574  | 84558465 | T  | ADD  | 5217  | 0.9197   | 0.06318  | 0.8126  | 1.041  | -1.326     | 0.185     |
| 16  | rs9941263  | 84558545 | G  | ADD  | 4368  | 0.9873   | 0.04673  | 0.9009  | 1.082  | -0.2726    | 0.7852    |
| 16  | rs9934725  | 84558585 | T  | ADD  | 4367  | 0.9872   | 0.04672  | 0.9008  | 1.082  | -0.2752    | 0.7831    |
| 16  | 84558619   | 84558619 | T  | ADD  | 7316  | 0.3559   | 0.7201   | 0.08678 | 1.46   | -1.435     | 0.1514    |
| 16  | rs9938885  | 84558713 | G  | ADD  | 4351  | 0.9906   | 0.04685  | 0.9037  | 1.086  | -0.2005    | 0.8411    |
| 16  | rs11648475 | 84558762 | G  | ADD  | 3602  | 0.9459   | 0.05064  | 0.8565  | 1.045  | -1.098     | 0.2724    |
| 16  | rs74032515 | 84558875 | G  | ADD  | 7074  | 0.7307   | 0.3564   | 0.3634  | 1.469  | -0.8802    | 0.3787    |
| 16  | rs74032517 | 84558990 | O  | ADD  | 7412  | NA       | NA       | NA      | NA     | NA         | NA        |
| 16  | rs72807046 | 84559122 | T  | ADD  | 6513  | 0.8267   | 0.2137   | 0.5438  | 1.257  | -0.8901    | 0.3734    |
| 16  | 84559204   | 84559204 | C  | ADD  | 7393  | 2.637    | 1.12     | 0.2933  | 23.7   | 0.8654     | 0.3868    |
| 16  | 84559353   | 84559353 | A  | ADD  | 7254  | 3.201    | 1.239    | 0.2823  | 36.3   | 0.9391     | 0.3477    |
| 16  | rs11860004 | 84559380 | A  | ADD  | 3872  | 0.9311   | 0.06474  | 0.8201  | 1.057  | -1.103     | 0.2702    |
| 16  | rs34912238 | 84559404 | T  | ADD  | 6923  | 0.8363   | 0.0477   | 0.7617  | 0.9183 | -3.747     | 0.0001793 |
| 16  | rs35655122 | 84559618 | T  | ADD  | 5263  | 0.927    | 0.06294  | 0.8194  | 1.049  | -1.204     | 0.2285    |
| 16  | rs11862493 | 84559626 | C  | ADD  | 5262  | 0.9286   | 0.06296  | 0.8208  | 1.051  | -1.176     | 0.2397    |

| <b>CHR</b> | <b>SNP</b> | <b>BP</b> | <b>A1</b> | <b>TEST</b> | <b>NMISS</b> | <b>OR</b> | <b>SE</b> | <b>L95</b> | <b>U95</b> | <b>STAT</b> | <b>P</b> |
|------------|------------|-----------|-----------|-------------|--------------|-----------|-----------|------------|------------|-------------|----------|
| 16         | rs11859186 | 84559852  | C         | ADD         | 5068         | 0.9788    | 0.07015   | 0.853      | 1.123      | -0.3061     | 0.7595   |

Table S5: Conditioning on rs450443

| CHR | SNP        | BP       | A1 | TEST | NMISS | OR       | SE       | L95    | U95    | STAT      | P        |
|-----|------------|----------|----|------|-------|----------|----------|--------|--------|-----------|----------|
| 16  | rs11861580 | 84456048 | G  | ADD  | 7316  | 0.8518   | 0.06812  | 0.7453 | 0.9734 | -2.355    | 0.0185   |
| 16  | rs9934049  | 84456117 | T  | ADD  | 6046  | 1.112    | 0.09711  | 0.919  | 1.345  | 1.09      | 0.2758   |
| 16  | 84456852   | 84456852 | A  | ADD  | 7377  | 0.6339   | 0.304    | 0.3494 | 1.15   | -1.5      | 0.1336   |
| 16  | 84457076   | 84457076 | T  | ADD  | 7362  | 2.03E+09 | 2.44E+04 | 0      | inf    | 0.0008791 | 0.9993   |
| 16  | rs16939834 | 84458109 | C  | ADD  | 7379  | 0.8004   | 0.2338   | 0.5062 | 1.266  | -0.9522   | 0.341    |
| 16  | 84458146   | 84458146 | A  | ADD  | 7373  | 9.33E+08 | 1.72E+04 | 0      | inf    | 0.001199  | 0.999    |
| 16  | rs11864884 | 84458540 | T  | ADD  | 7373  | 1.051    | 0.03867  | 0.9741 | 1.133  | 1.28      | 0.2004   |
| 16  | rs7185918  | 84458566 | T  | ADD  | 7380  | 1.039    | 0.0428   | 0.9553 | 1.13   | 0.8924    | 0.3722   |
| 16  | 84458726   | 84458726 | C  | ADD  | 7356  | 1.279    | 0.1948   | 0.8733 | 1.874  | 1.264     | 0.2061   |
| 16  | rs72805167 | 84458737 | G  | ADD  | 7204  | 1.13     | 0.4348   | 0.4821 | 2.651  | 0.282     | 0.778    |
| 16  | 84458834   | 84458834 | O  | ADD  | 6376  | NA       | NA       | NA     | NA     | NA        | NA       |
| 16  | rs11859433 | 84458903 | C  | ADD  | 7331  | 0.8466   | 0.06893  | 0.7396 | 0.9691 | -2.416    | 0.0157   |
| 16  | 84459157   | 84459157 | G  | ADD  | 7065  | 0.8254   | 0.07036  | 0.7191 | 0.9475 | -2.727    | 0.006399 |
| 16  | rs12926601 | 84459167 | T  | ADD  | 7107  | 1.124    | 0.04419  | 1.031  | 1.226  | 2.654     | 0.007951 |
| 16  | rs4843854  | 84460016 | C  | ADD  | 7352  | 1.106    | 0.03499  | 1.033  | 1.184  | 2.876     | 0.004022 |
| 16  | rs4843855  | 84460047 | T  | ADD  | 6863  | 1.013    | 0.0391   | 0.9379 | 1.093  | 0.3199    | 0.7491   |
| 16  | rs4843856  | 84460058 | C  | ADD  | 7356  | 1.069    | 0.03466  | 0.999  | 1.144  | 1.932     | 0.0534   |
| 16  | rs12930347 | 84461177 | C  | ADD  | 7374  | 1.099    | 0.04175  | 1.013  | 1.193  | 2.259     | 0.02391  |
| 16  | 84461320   | 84461320 | O  | ADD  | 7380  | NA       | NA       | NA     | NA     | NA        | NA       |
| 16  | rs62052470 | 84461723 | A  | ADD  | 6829  | 0.8384   | 0.09399  | 0.6973 | 1.008  | -1.875    | 0.06073  |
| 16  | 84461729   | 84461729 | O  | ADD  | 7383  | NA       | NA       | NA     | NA     | NA        | NA       |
| 16  | rs62052471 | 84462333 | G  | ADD  | 6621  | 0.9254   | 0.115    | 0.7386 | 1.159  | -0.6736   | 0.5006   |
| 16  | 84462405   | 84462405 | A  | ADD  | 6285  | 1.029    | 0.04402  | 0.944  | 1.122  | 0.65      | 0.5157   |
| 16  | 84462407   | 84462407 | A  | ADD  | 5658  | 1.039    | 0.04868  | 0.9445 | 1.143  | 0.7879    | 0.4308   |
| 16  | 84462423   | 84462423 | A  | ADD  | 5151  | 1.038    | 0.1261   | 0.8108 | 1.329  | 0.2967    | 0.7667   |
| 16  | 84462425   | 84462425 | A  | ADD  | 3731  | 1.189    | 0.0928   | 0.991  | 1.426  | 1.862     | 0.06254  |
| 16  | 84462437   | 84462437 | C  | ADD  | 3973  | 1.228    | 0.09809  | 1.013  | 1.488  | 2.09      | 0.03659  |
| 16  | 84462507   | 84462507 | C  | ADD  | 4987  | 1.061    | 0.09976  | 0.8723 | 1.29   | 0.5902    | 0.5551   |
| 16  | 84462539   | 84462539 | C  | ADD  | 7102  | 1.006    | 0.1159   | 0.8014 | 1.262  | 0.0491    | 0.9608   |
| 16  | rs55697192 | 84462546 | C  | ADD  | 6034  | 1.142    | 0.07265  | 0.9904 | 1.317  | 1.827     | 0.06773  |
| 16  | 84463073   | 84463073 | A  | ADD  | 6688  | 1.51     | 0.2285   | 0.965  | 2.363  | 1.804     | 0.07125  |
| 16  | 84463237   | 84463237 | T  | ADD  | 7219  | 0.9734   | 0.194    | 0.6655 | 1.424  | -0.139    | 0.8895   |
| 16  | rs12935659 | 84463429 | C  | ADD  | 7357  | 1.013    | 0.03835  | 0.9394 | 1.092  | 0.3287    | 0.7424   |
| 16  | 84463607   | 84463607 | O  | ADD  | 7384  | NA       | NA       | NA     | NA     | NA        | NA       |
| 16  | rs72805168 | 84463633 | C  | ADD  | 7249  | 1.452    | 0.9683   | 0.2176 | 9.686  | 0.3851    | 0.7002   |
| 16  | rs62052474 | 84463910 | A  | ADD  | 7351  | 0.8076   | 0.06586  | 0.7098 | 0.9188 | -3.246    | 0.001172 |
| 16  | 84463953   | 84463953 | T  | ADD  | 7337  | 0.8333   | 1.415    | 0.052  | 13.35  | -0.1289   | 0.8975   |
| 16  | 84463987   | 84463987 | O  | ADD  | 7384  | NA       | NA       | NA     | NA     | NA        | NA       |
| 16  | 84464105   | 84464105 | O  | ADD  | 7384  | NA       | NA       | NA     | NA     | NA        | NA       |
| 16  | rs11648716 | 84464117 | G  | ADD  | 7383  | 0.8201   | 0.06485  | 0.7222 | 0.9312 | -3.058    | 0.002225 |
| 16  | rs8056522  | 84464397 | C  | ADD  | 7373  | 1.059    | 0.04317  | 0.9732 | 1.153  | 1.33      | 0.1836   |
| 16  | rs9929675  | 84464599 | A  | ADD  | 7350  | 1.018    | 0.0386   | 0.9434 | 1.097  | 0.4503    | 0.6525   |
| 16  | rs9929701  | 84464675 | C  | ADD  | 7351  | 1.018    | 0.0386   | 0.9436 | 1.098  | 0.4555    | 0.6488   |
| 16  | rs9924234  | 84465076 | C  | ADD  | 7355  | 1.019    | 0.03859  | 0.945  | 1.099  | 0.4939    | 0.6214   |
| 16  | rs9930043  | 84465079 | C  | ADD  | 7362  | 1.017    | 0.03858  | 0.943  | 1.097  | 0.4388    | 0.6608   |
| 16  | 84465151   | 84465151 | C  | ADD  | 7320  | 1.113    | 0.04304  | 1.023  | 1.211  | 2.479     | 0.01319  |
| 16  | rs9932359  | 84465411 | A  | ADD  | 7353  | 1.019    | 0.03859  | 0.9451 | 1.099  | 0.4966    | 0.6195   |
| 16  | rs12448297 | 84467210 | O  | ADD  | 7384  | NA       | NA       | NA     | NA     | NA        | NA       |
| 16  | rs13336885 | 84469034 | C  | ADD  | 7234  | 1.019    | 0.03876  | 0.9447 | 1.1    | 0.4914    | 0.6231   |
| 16  | rs7200396  | 84469798 | C  | ADD  | 7355  | 1.012    | 0.03834  | 0.9387 | 1.091  | 0.3105    | 0.7562   |
| 16  | rs9923975  | 84469936 | G  | ADD  | 7339  | 1.076    | 0.04353  | 0.9876 | 1.171  | 1.673     | 0.09436  |
| 16  | rs9932159  | 84470103 | T  | ADD  | 7358  | 1.015    | 0.03847  | 0.941  | 1.094  | 0.3792    | 0.7045   |
| 16  | rs9936199  | 84470118 | G  | ADD  | 7358  | 1.012    | 0.03834  | 0.939  | 1.091  | 0.3173    | 0.751    |

| CHR | SNP        | BP       | A1 | TEST | NMISS | OR       | SE       | L95    | U95    | STAT       | P         |
|-----|------------|----------|----|------|-------|----------|----------|--------|--------|------------|-----------|
| 16  | rs750669   | 84470371 | G  | ADD  | 7312  | 1.068    | 0.03486  | 0.9974 | 1.143  | 1.886      | 0.05935   |
| 16  | rs2017161  | 84470594 | C  | ADD  | 7213  | 1.004    | 0.03851  | 0.9314 | 1.083  | 0.1146     | 0.9087    |
| 16  | 84470606   | 84470606 | A  | ADD  | 7340  | 1.062    | 0.03464  | 0.992  | 1.136  | 1.728      | 0.08401   |
| 16  | 84471137   | 84471137 | G  | ADD  | 7358  | 8.15E+08 | 1.72E+04 | 0      | inf    | 0.00119    | 0.9991    |
| 16  | 84471981   | 84471981 | T  | ADD  | 6635  | 0.9191   | 0.1335   | 0.7074 | 1.194  | -0.6318    | 0.5275    |
| 16  | 84472217   | 84472217 | T  | ADD  | 6955  | 4.83E-10 | 2.44E+04 | 0      | inf    | -0.0008799 | 0.9993    |
| 16  | rs55967832 | 84472469 | C  | ADD  | 7146  | 1.059    | 0.03506  | 0.9888 | 1.134  | 1.637      | 0.1015    |
| 16  | rs9925103  | 84472609 | G  | ADD  | 7053  | 0.8674   | 0.2296   | 0.553  | 1.36   | -0.6197    | 0.5355    |
| 16  | rs34318854 | 84472707 | C  | ADD  | 7145  | 1.059    | 0.03505  | 0.9889 | 1.135  | 1.643      | 0.1004    |
| 16  | rs34723871 | 84472711 | C  | ADD  | 7145  | 1.059    | 0.03505  | 0.9889 | 1.135  | 1.643      | 0.1004    |
| 16  | rs56143130 | 84472719 | C  | ADD  | 7145  | 1.059    | 0.03505  | 0.9889 | 1.135  | 1.643      | 0.1004    |
| 16  | rs9925282  | 84472806 | O  | ADD  | 7384  | NA       | NA       | NA     | NA     | NA         | NA        |
| 16  | rs9931862  | 84472878 | T  | ADD  | 7152  | 1.094    | 0.04384  | 1.004  | 1.192  | 2.044      | 0.04098   |
| 16  | rs9931687  | 84473282 | A  | ADD  | 7364  | 1.113    | 0.04341  | 1.022  | 1.212  | 2.469      | 0.01356   |
| 16  | rs6540231  | 84473561 | G  | ADD  | 7340  | 1.045    | 0.03461  | 0.976  | 1.118  | 1.258      | 0.2083    |
| 16  | 84473745   | 84473745 | O  | ADD  | 6386  | NA       | NA       | NA     | NA     | NA         | NA        |
| 16  | 84474001   | 84474001 | C  | ADD  | 6388  | 1.004    | 0.04453  | 0.9198 | 1.095  | 0.08157    | 0.935     |
| 16  | 84474531   | 84474531 | C  | ADD  | 6692  | 0.8991   | 0.8592   | 0.1669 | 4.844  | -0.1238    | 0.9015    |
| 16  | rs367170   | 84474588 | A  | ADD  | 4823  | 1.214    | 0.0984   | 1.001  | 1.472  | 1.967      | 0.04919   |
| 16  | rs409219   | 84474592 | T  | ADD  | 4748  | 1.383    | 0.1203   | 1.092  | 1.751  | 2.694      | 0.007066  |
| 16  | 84474714   | 84474714 | C  | ADD  | 5039  | 1.033    | 0.05822  | 0.9215 | 1.158  | 0.5561     | 0.5781    |
| 16  | rs62052475 | 84474717 | C  | ADD  | 5048  | 1.035    | 0.05802  | 0.9242 | 1.16   | 0.6007     | 0.548     |
| 16  | 84474721   | 84474721 | C  | ADD  | 5736  | 1.116    | 0.1598   | 0.8156 | 1.526  | 0.6852     | 0.4932    |
| 16  | rs426900   | 84474799 | C  | ADD  | 6749  | 0.9179   | 0.0758   | 0.7912 | 1.065  | -1.13      | 0.2585    |
| 16  | rs9937847  | 84475052 | C  | ADD  | 7369  | 0.9899   | 0.06677  | 0.8685 | 1.128  | -0.152     | 0.8792    |
| 16  | rs16939877 | 84475320 | A  | ADD  | 6804  | 0.8579   | 0.1115   | 0.6894 | 1.068  | -1.374     | 0.1694    |
| 16  | rs376783   | 84475324 | A  | ADD  | 7376  | 1.118    | 0.04123  | 1.031  | 1.212  | 2.698      | 0.006986  |
| 16  | rs428578   | 84475445 | G  | ADD  | 7278  | 1.019    | 0.03632  | 0.9487 | 1.094  | 0.5109     | 0.6095    |
| 16  | 84475528   | 84475528 | A  | ADD  | 7016  | 0.8133   | 0.2029   | 0.5464 | 1.211  | -1.018     | 0.3085    |
| 16  | rs371800   | 84475621 | T  | ADD  | 7354  | 1.139    | 0.09208  | 0.9512 | 1.365  | 1.416      | 0.1567    |
| 16  | rs447377   | 84476336 | G  | ADD  | 7350  | 1.016    | 0.03618  | 0.9468 | 1.091  | 0.4494     | 0.6532    |
| 16  | rs9936406  | 84476343 | T  | ADD  | 7378  | 0.992    | 0.03706  | 0.9225 | 1.067  | -0.2167    | 0.8285    |
| 16  | 84476544   | 84476544 | C  | ADD  | 7318  | 0.9803   | 0.06966  | 0.8552 | 1.124  | -0.285     | 0.7757    |
| 16  | rs439390   | 84476707 | G  | ADD  | 7115  | 1.003    | 0.03673  | 0.9331 | 1.078  | 0.07372    | 0.9412    |
| 16  | 84476754   | 84476754 | C  | ADD  | 7341  | 0.7579   | 0.07574  | 0.6534 | 0.8792 | -3.66      | 0.0002527 |
| 16  | rs9928868  | 84476971 | C  | ADD  | 7339  | 0.9971   | 0.5405   | 0.3457 | 2.876  | -0.005434  | 0.9957    |
| 16  | rs384915   | 84477113 | A  | ADD  | 7322  | 1.113    | 0.09473  | 0.9243 | 1.34   | 1.129      | 0.2588    |
| 16  | 84477167   | 84477167 | C  | ADD  | 4705  | 0.8786   | 0.07371  | 0.7604 | 1.015  | -1.756     | 0.0791    |
| 16  | 84477725   | 84477725 | A  | ADD  | 7374  | 4.421    | 1.28     | 0.3598 | 54.32  | 1.161      | 0.2455    |
| 16  | rs438968   | 84477729 | C  | ADD  | 7332  | 1.014    | 0.03605  | 0.9446 | 1.088  | 0.3782     | 0.7052    |
| 16  | rs12596376 | 84477898 | C  | ADD  | 7261  | 0.9935   | 0.03969  | 0.9191 | 1.074  | -0.1642    | 0.8696    |
| 16  | rs370703   | 84477981 | T  | ADD  | 7373  | 1.014    | 0.03604  | 0.9452 | 1.089  | 0.3956     | 0.6924    |
| 16  | 84478065   | 84478065 | G  | ADD  | 7358  | 0.6406   | 0.7897   | 0.1363 | 3.012  | -0.5639    | 0.5728    |
| 16  | rs395922   | 84478180 | C  | ADD  | 6977  | 1.049    | 0.09588  | 0.8694 | 1.266  | 0.5003     | 0.6169    |
| 16  | rs6540232  | 84478303 | C  | ADD  | 7280  | 0.9945   | 0.03721  | 0.9245 | 1.07   | -0.1487    | 0.8818    |
| 16  | 84478601   | 84478601 | C  | ADD  | 7359  | 1.143    | 0.09629  | 0.9461 | 1.38   | 1.384      | 0.1663    |
| 16  | rs448136   | 84478848 | C  | ADD  | 6991  | 0.9934   | 0.03622  | 0.9253 | 1.067  | -0.1824    | 0.8553    |
| 16  | 84478905   | 84478905 | C  | ADD  | 7379  | 0.6978   | 0.296    | 0.3907 | 1.247  | -1.215     | 0.2242    |
| 16  | rs11642286 | 84479110 | G  | ADD  | 7380  | 0.7573   | 0.07402  | 0.655  | 0.8755 | -3.756     | 0.0001727 |
| 16  | rs391821   | 84479528 | T  | ADD  | 7077  | 1.005    | 0.09614  | 0.8321 | 1.213  | 0.04844    | 0.9614    |
| 16  | rs428530   | 84480360 | G  | ADD  | 7327  | 1.122    | 0.09272  | 0.9355 | 1.345  | 1.24       | 0.2148    |
| 16  | rs11866609 | 84480582 | G  | ADD  | 7382  | 1.341    | 0.3902   | 0.624  | 2.88   | 0.7512     | 0.4525    |
| 16  | rs421710   | 84481015 | C  | ADD  | 7380  | 1.01     | 0.03601  | 0.9411 | 1.084  | 0.2731     | 0.7848    |

| CHR | SNP        | BP       | A1 | TEST | NMISS | OR       | SE       | L95    | U95   | STAT     | P         |
|-----|------------|----------|----|------|-------|----------|----------|--------|-------|----------|-----------|
| 16  | rs9308363  | 84481566 | C  | ADD  | 7337  | 0.9905   | 0.03675  | 0.9216 | 1.064 | -0.2602  | 0.7947    |
| 16  | 84481963   | 84481963 | A  | ADD  | 6886  | 0.7832   | 0.3344   | 0.4067 | 1.508 | -0.731   | 0.4648    |
| 16  | rs433322   | 84482073 | G  | ADD  | 7318  | 1.012    | 0.03602  | 0.9433 | 1.086 | 0.3398   | 0.734     |
| 16  | rs11860464 | 84482464 | T  | ADD  | 7231  | 0.7721   | 0.5152   | 0.2813 | 2.119 | -0.502   | 0.6157    |
| 16  | 84482479   | 84482479 | C  | ADD  | 7328  | 0.9928   | 0.03679  | 0.9237 | 1.067 | -0.196   | 0.8446    |
| 16  | 84482626   | 84482626 | O  | ADD  | 7103  | NA       | NA       | NA     | NA    | NA       | NA        |
| 16  | rs401528   | 84482872 | G  | ADD  | 7293  | 1.136    | 0.08954  | 0.9536 | 1.355 | 1.429    | 0.153     |
| 16  | rs7193803  | 84483174 | G  | ADD  | 7380  | 0.9917   | 0.03678  | 0.9227 | 1.066 | -0.2264  | 0.8209    |
| 16  | 84483336   | 84483336 | O  | ADD  | 7372  | NA       | NA       | NA     | NA    | NA       | NA        |
| 16  | rs11117411 | 84483439 | T  | ADD  | 7296  | 0.7582   | 0.07544  | 0.654  | 0.879 | -3.669   | 0.0002435 |
| 16  | rs437740   | 84483537 | C  | ADD  | 7357  | 1.124    | 0.09367  | 0.9354 | 1.35  | 1.247    | 0.2123    |
| 16  | 84483596   | 84483596 | A  | ADD  | 7177  | 0.7853   | 0.207    | 0.5234 | 1.178 | -1.168   | 0.2429    |
| 16  | rs438323   | 84483902 | C  | ADD  | 7356  | 1.133    | 0.09376  | 0.9426 | 1.361 | 1.33     | 0.1835    |
| 16  | rs12922615 | 84484196 | T  | ADD  | 7285  | 0.9539   | 0.07075  | 0.8304 | 1.096 | -0.6666  | 0.505     |
| 16  | rs394100   | 84484220 | A  | ADD  | 7177  | 1.092    | 0.09038  | 0.9144 | 1.303 | 0.9695   | 0.3323    |
| 16  | rs395498   | 84484222 | G  | ADD  | 7292  | 1.021    | 0.03613  | 0.9511 | 1.096 | 0.5723   | 0.5671    |
| 16  | rs452478   | 84484245 | G  | ADD  | 7356  | 1.127    | 0.09363  | 0.9383 | 1.354 | 1.279    | 0.2008    |
| 16  | rs452532   | 84484267 | G  | ADD  | 7355  | 1.133    | 0.09374  | 0.9426 | 1.361 | 1.329    | 0.1838    |
| 16  | rs11117412 | 84484343 | A  | ADD  | 7075  | 1.011    | 0.0405   | 0.9334 | 1.094 | 0.2586   | 0.796     |
| 16  | rs434216   | 84484514 | C  | ADD  | 7026  | 1.012    | 0.03644  | 0.9418 | 1.086 | 0.3148   | 0.7529    |
| 16  | rs1809094  | 84484727 | A  | ADD  | 6687  | 1.061    | 0.0431   | 0.9747 | 1.154 | 1.364    | 0.1724    |
| 16  | 84484809   | 84484809 | G  | ADD  | 7246  | 1.545    | 0.3733   | 0.7434 | 3.212 | 1.166    | 0.2437    |
| 16  | rs572967   | 84484995 | G  | ADD  | 7237  | 1.005    | 0.03658  | 0.9353 | 1.08  | 0.1324   | 0.8947    |
| 16  | rs896263   | 84485020 | G  | ADD  | 7377  | 1.077    | 0.0392   | 0.9971 | 1.163 | 1.885    | 0.05943   |
| 16  | rs403605   | 84485129 | A  | ADD  | 7370  | 0.9716   | 0.06013  | 0.8636 | 1.093 | -0.4792  | 0.6318    |
| 16  | rs454128   | 84485236 | G  | ADD  | 7021  | 1.023    | 0.0399   | 0.9461 | 1.106 | 0.5711   | 0.568     |
| 16  | rs391023   | 84485315 | T  | ADD  | 7329  | 1.038    | 0.03617  | 0.9671 | 1.114 | 1.034    | 0.3013    |
| 16  | rs375288   | 84485372 | A  | ADD  | 7263  | 1.019    | 0.03691  | 0.9481 | 1.096 | 0.5157   | 0.6061    |
| 16  | rs446836   | 84485520 | T  | ADD  | 7032  | 0.7299   | 0.2985   | 0.4067 | 1.31  | -1.055   | 0.2915    |
| 16  | rs873616   | 84485667 | G  | ADD  | 7052  | 1.115    | 0.04532  | 1.02   | 1.219 | 2.407    | 0.01608   |
| 16  | 84485701   | 84485701 | O  | ADD  | 7383  | NA       | NA       | NA     | NA    | NA       | NA        |
| 16  | rs60241040 | 84486065 | G  | ADD  | 7309  | 1.104    | 0.0443   | 1.012  | 1.204 | 2.238    | 0.0252    |
| 16  | rs391855   | 84486122 | T  | ADD  | 7373  | 0.9983   | 0.03604  | 0.9302 | 1.071 | -0.04681 | 0.9627    |
| 16  | rs12149363 | 84486206 | G  | ADD  | 7309  | 0.9564   | 0.07064  | 0.8327 | 1.098 | -0.6312  | 0.5279    |
| 16  | rs386098   | 84486701 | A  | ADD  | 7185  | 0.9692   | 0.06912  | 0.8464 | 1.11  | -0.4527  | 0.6508    |
| 16  | rs369173   | 84486783 | G  | ADD  | 7377  | 0.9918   | 0.03573  | 0.9247 | 1.064 | -0.2308  | 0.8175    |
| 16  | rs398114   | 84486785 | C  | ADD  | 7160  | 0.999    | 0.03638  | 0.9302 | 1.073 | -0.02851 | 0.9773    |
| 16  | rs369597   | 84486935 | C  | ADD  | 7367  | 0.9639   | 0.06873  | 0.8424 | 1.103 | -0.5352  | 0.5925    |
| 16  | rs9924391  | 84487331 | T  | ADD  | 7376  | 0.949    | 0.06967  | 0.8279 | 1.088 | -0.7508  | 0.4528    |
| 16  | rs9932449  | 84487333 | A  | ADD  | 7374  | 0.9557   | 0.06864  | 0.8354 | 1.093 | -0.6605  | 0.5089    |
| 16  | rs371391   | 84487395 | C  | ADD  | 7373  | 0.9696   | 0.06892  | 0.8471 | 1.11  | -0.448   | 0.6542    |
| 16  | rs388405   | 84487398 | A  | ADD  | 7382  | 0.9539   | 0.06836  | 0.8342 | 1.091 | -0.6911  | 0.4895    |
| 16  | rs28368111 | 84487756 | C  | ADD  | 7344  | 1.572    | 0.4022   | 0.7146 | 3.457 | 1.124    | 0.2608    |
| 16  | 84487779   | 84487779 | T  | ADD  | 7326  | 9.37E+08 | 1.72E+04 | 0      | inf   | 0.001199 | 0.999     |
| 16  | rs381139   | 84487901 | C  | ADD  | 7269  | 0.9618   | 0.06994  | 0.8386 | 1.103 | -0.5576  | 0.5771    |
| 16  | rs393512   | 84488072 | C  | ADD  | 7324  | 0.934    | 0.06831  | 0.817  | 1.068 | -0.9992  | 0.3177    |
| 16  | rs416515   | 84488175 | C  | ADD  | 7317  | 0.9508   | 0.06993  | 0.829  | 1.09  | -0.7215  | 0.4706    |
| 16  | rs398229   | 84488191 | A  | ADD  | 7317  | 0.9508   | 0.06993  | 0.829  | 1.09  | -0.7215  | 0.4706    |
| 16  | 84488361   | 84488361 | C  | ADD  | 1969  | 1.189    | 0.1219   | 0.9365 | 1.51  | 1.422    | 0.155     |
| 16  | 84488362   | 84488362 | C  | ADD  | 3752  | 1.085    | 0.1201   | 0.8571 | 1.372 | 0.6756   | 0.4993    |
| 16  | rs28368112 | 84488458 | C  | ADD  | 6979  | 1.119    | 0.04436  | 1.026  | 1.221 | 2.536    | 0.01122   |
| 16  | 84488780   | 84488780 | C  | ADD  | 7103  | 0.5726   | 0.3278   | 0.3012 | 1.089 | -1.701   | 0.08893   |
| 16  | rs170033   | 84489005 | A  | ADD  | 6651  | 0.9985   | 0.06623  | 0.877  | 1.137 | -0.02218 | 0.9823    |



| CHR | SNP        | BP       | A1 | TEST | NMISS | OR     | SE      | L95     | U95    | STAT     | P         |
|-----|------------|----------|----|------|-------|--------|---------|---------|--------|----------|-----------|
| 16  | 84489382   | 84489382 | 0  | ADD  | 7383  | NA     | NA      | NA      | NA     | NA       | NA        |
| 16  | rs4843859  | 84489457 | G  | ADD  | 7301  | 1.099  | 0.04296 | 1.01    | 1.195  | 2.196    | 0.02807   |
| 16  | rs8058349  | 84489530 | G  | ADD  | 7352  | 0.8965 | 0.0713  | 0.7796  | 1.031  | -1.532   | 0.1254    |
| 16  | rs191022   | 84489633 | G  | ADD  | 7252  | 1.064  | 0.03917 | 0.9856  | 1.149  | 1.589    | 0.1121    |
| 16  | rs188602   | 84489852 | T  | ADD  | 7232  | 0.9366 | 0.06979 | 0.8168  | 1.074  | -0.9392  | 0.3476    |
| 16  | rs422186   | 84489971 | A  | ADD  | 7334  | 0.9354 | 0.07036 | 0.8149  | 1.074  | -0.9487  | 0.3427    |
| 16  | rs56177354 | 84490153 | T  | ADD  | 6682  | 0.7696 | 0.2987  | 0.4286  | 1.382  | -0.8767  | 0.3807    |
| 16  | rs2270501  | 84490489 | T  | ADD  | 7375  | 1.118  | 0.04458 | 1.024   | 1.22   | 2.499    | 0.01245   |
| 16  | rs2270502  | 84490539 | T  | ADD  | 7196  | 0.9173 | 0.07549 | 0.7911  | 1.064  | -1.144   | 0.2526    |
| 16  | 84490567   | 84490567 | 0  | ADD  | 7375  | NA     | NA      | NA      | NA     | NA       | NA        |
| 16  | 84490724   | 84490724 | A  | ADD  | 7326  | 0.6339 | 1.266   | 0.05297 | 7.587  | -0.3599  | 0.7189    |
| 16  | 84491082   | 84491082 | A  | ADD  | 7296  | 1.188  | 0.09844 | 0.9795  | 1.441  | 1.749    | 0.08021   |
| 16  | rs56196648 | 84491219 | A  | ADD  | 6601  | 0.9062 | 0.1379  | 0.6916  | 1.187  | -0.7142  | 0.4751    |
| 16  | rs305084   | 84491669 | C  | ADD  | 7313  | 1.209  | 0.059   | 1.077   | 1.358  | 3.223    | 0.00127   |
| 16  | rs12447817 | 84491725 | A  | ADD  | 5190  | 0.995  | 0.14    | 0.7562  | 1.309  | -0.03586 | 0.9714    |
| 16  | 84491886   | 84491886 | G  | ADD  | 7342  | 2.204  | 0.386   | 1.034   | 4.696  | 2.047    | 0.04068   |
| 16  | 84491947   | 84491947 | 0  | ADD  | 7384  | NA     | NA      | NA      | NA     | NA       | NA        |
| 16  | 84492016   | 84492016 | C  | ADD  | 7179  | 0.9488 | 0.07372 | 0.8212  | 1.096  | -0.7122  | 0.4763    |
| 16  | rs1519978  | 84492712 | T  | ADD  | 7351  | 0.9109 | 0.04708 | 0.8306  | 0.999  | -1.981   | 0.04755   |
| 16  | rs16939906 | 84493007 | A  | ADD  | 7307  | 1.267  | 0.5736  | 0.4115  | 3.899  | 0.4122   | 0.6802    |
| 16  | 84493033   | 84493033 | C  | ADD  | 5862  | 0.7963 | 0.2728  | 0.4665  | 1.359  | -0.8349  | 0.4038    |
| 16  | rs16882    | 84493074 | C  | ADD  | 7371  | 0.9091 | 0.04695 | 0.8291  | 0.9967 | -2.03    | 0.04234   |
| 16  | rs11649549 | 84493298 | C  | ADD  | 7362  | 0.9062 | 0.047   | 0.8265  | 0.9937 | -2.095   | 0.03615   |
| 16  | rs305083   | 84493379 | G  | ADD  | 7242  | 0.8941 | 0.04801 | 0.8138  | 0.9823 | -2.332   | 0.0197    |
| 16  | rs12924316 | 84493764 | T  | ADD  | 7378  | 1.106  | 0.04428 | 1.014   | 1.206  | 2.274    | 0.02297   |
| 16  | 84493893   | 84493893 | C  | ADD  | 4269  | 1.137  | 0.06318 | 1.005   | 1.287  | 2.035    | 0.04184   |
| 16  | 84493900   | 84493900 | C  | ADD  | 4332  | 1.137  | 0.06303 | 1.005   | 1.286  | 2.036    | 0.04174   |
| 16  | 84493903   | 84493903 | C  | ADD  | 4333  | 1.133  | 0.06301 | 1.001   | 1.282  | 1.978    | 0.04798   |
| 16  | 84493958   | 84493958 | C  | ADD  | 7358  | 1.445  | 0.4382  | 0.6121  | 3.411  | 0.8399   | 0.4009    |
| 16  | 84494383   | 84494383 | T  | ADD  | 7212  | 0.8951 | 0.1947  | 0.6112  | 1.311  | -0.5695  | 0.569     |
| 16  | rs305082   | 84494479 | C  | ADD  | 7374  | 0.91   | 0.04675 | 0.8304  | 0.9974 | -2.016   | 0.04376   |
| 16  | 84494689   | 84494689 | 0  | ADD  | 7361  | NA     | NA      | NA      | NA     | NA       | NA        |
| 16  | 84494863   | 84494863 | C  | ADD  | 7347  | 1.22   | 0.09599 | 1.01    | 1.472  | 2.069    | 0.03858   |
| 16  | 84495087   | 84495087 | T  | ADD  | 7208  | 2.58   | 0.918   | 0.4268  | 15.59  | 1.032    | 0.3019    |
| 16  | rs182511   | 84495157 | G  | ADD  | 7381  | 1.179  | 0.1291  | 0.9158  | 1.519  | 1.278    | 0.2012    |
| 16  | 84495288   | 84495288 | 0  | ADD  | 7011  | NA     | NA      | NA      | NA     | NA       | NA        |
| 16  | 84495780   | 84495780 | A  | ADD  | 7363  | 1.435  | 1.082   | 0.172   | 11.97  | 0.3335   | 0.7388    |
| 16  | 84495918   | 84495918 | C  | ADD  | 4715  | 1.149  | 0.1616  | 0.8373  | 1.577  | 0.8611   | 0.3892    |
| 16  | 84495937   | 84495937 | C  | ADD  | 5812  | 0.9016 | 0.1112  | 0.725   | 1.121  | -0.9307  | 0.352     |
| 16  | 84495977   | 84495977 | C  | ADD  | 7092  | 0.9895 | 0.1848  | 0.6888  | 1.421  | -0.05737 | 0.9542    |
| 16  | rs11642583 | 84496096 | G  | ADD  | 7341  | 0.8344 | 0.05107 | 0.755   | 0.9223 | -3.544   | 0.000394  |
| 16  | rs9940980  | 84496182 | T  | ADD  | 7380  | 0.8448 | 0.05099 | 0.7645  | 0.9336 | -3.307   | 0.0009428 |
| 16  | rs9926664  | 84496256 | G  | ADD  | 7357  | 0.844  | 0.05116 | 0.7634  | 0.933  | -3.316   | 0.000912  |
| 16  | rs11646550 | 84496336 | A  | ADD  | 7332  | 0.842  | 0.05134 | 0.7614  | 0.9312 | -3.349   | 0.0008105 |
| 16  | 84496676   | 84496676 | 0  | ADD  | 7373  | NA     | NA      | NA      | NA     | NA       | NA        |
| 16  | 84496724   | 84496724 | 0  | ADD  | 7383  | NA     | NA      | NA      | NA     | NA       | NA        |
| 16  | 84496745   | 84496745 | C  | ADD  | 7093  | 1.44   | 1.082   | 0.1726  | 12.02  | 0.337    | 0.7361    |
| 16  | 84496751   | 84496751 | C  | ADD  | 7093  | 1.44   | 1.082   | 0.1726  | 12.02  | 0.337    | 0.7361    |
| 16  | rs3794662  | 84497151 | A  | ADD  | 7367  | 1.229  | 0.09559 | 1.019   | 1.482  | 2.154    | 0.03122   |
| 16  | 84497159   | 84497159 | 0  | ADD  | 7376  | NA     | NA      | NA      | NA     | NA       | NA        |
| 16  | rs3794661  | 84497167 | A  | ADD  | 7340  | 1.195  | 0.09617 | 0.9898  | 1.443  | 1.853    | 0.06382   |
| 16  | rs62052556 | 84497511 | T  | ADD  | 7298  | 0.8255 | 0.05209 | 0.7454  | 0.9143 | -3.68    | 0.000233  |
| 16  | 84497894   | 84497894 | G  | ADD  | 7274  | 0.9037 | 0.7287  | 0.2167  | 3.769  | -0.139   | 0.8895    |

| CHR | SNP        | BP       | A1 | TEST | NMISS | OR     | SE      | L95     | U95    | STAT     | P        |
|-----|------------|----------|----|------|-------|--------|---------|---------|--------|----------|----------|
| 16  | 84497914   | 84497914 | G  | ADD  | 7274  | 0.9037 | 0.7287  | 0.2167  | 3.769  | -0.139   | 0.8895   |
| 16  | 84498477   | 84498477 | G  | ADD  | 7101  | 0.9949 | 0.1293  | 0.7722  | 1.282  | -0.03971 | 0.9683   |
| 16  | rs4843320  | 84498514 | T  | ADD  | 7247  | 1.084  | 0.0467  | 0.9895  | 1.188  | 1.733    | 0.08311  |
| 16  | 84498527   | 84498527 | A  | ADD  | 7193  | 0.8964 | 0.1947  | 0.612   | 1.313  | -0.5618  | 0.5743   |
| 16  | 84498533   | 84498533 | T  | ADD  | 7102  | 0.9795 | 0.3003  | 0.5437  | 1.765  | -0.06881 | 0.9451   |
| 16  | 84499184   | 84499184 | G  | ADD  | 7336  | 1.603  | 0.5049  | 0.596   | 4.313  | 0.935    | 0.3498   |
| 16  | rs305080   | 84499275 | T  | ADD  | 7282  | 0.9829 | 0.03844 | 0.9116  | 1.06   | -0.4486  | 0.6537   |
| 16  | 84499414   | 84499414 | G  | ADD  | 7161  | 1.308  | 0.18    | 0.9188  | 1.861  | 1.49     | 0.1363   |
| 16  | rs10514610 | 84499676 | C  | ADD  | 7382  | 1.199  | 0.09234 | 1.001   | 1.437  | 1.968    | 0.04903  |
| 16  | rs16939917 | 84499921 | A  | ADD  | 7324  | 1.212  | 0.09234 | 1.012   | 1.453  | 2.086    | 0.03699  |
| 16  | rs305079   | 84499997 | C  | ADD  | 7371  | 1.262  | 0.08982 | 1.058   | 1.505  | 2.593    | 0.009519 |
| 16  | 84500417   | 84500417 | O  | ADD  | 7351  | NA     | NA      | NA      | NA     | NA       | NA       |
| 16  | rs305078   | 84500644 | G  | ADD  | 7350  | 2.752  | 0.5334  | 0.9673  | 7.828  | 1.898    | 0.05775  |
| 16  | rs3794660  | 84500669 | C  | ADD  | 7299  | 1.173  | 0.09901 | 0.9661  | 1.424  | 1.611    | 0.1071   |
| 16  | 84500726   | 84500726 | T  | ADD  | 7193  | 0.896  | 0.1947  | 0.6118  | 1.312  | -0.5643  | 0.5726   |
| 16  | rs305077   | 84500967 | C  | ADD  | 7377  | 1.003  | 0.03802 | 0.9314  | 1.081  | 0.08929  | 0.9289   |
| 16  | 84501753   | 84501753 | O  | ADD  | 7376  | NA     | NA      | NA      | NA     | NA       | NA       |
| 16  | 84501767   | 84501767 | O  | ADD  | 7376  | NA     | NA      | NA      | NA     | NA       | NA       |
| 16  | 84501890   | 84501890 | O  | ADD  | 7384  | NA     | NA      | NA      | NA     | NA       | NA       |
| 16  | 84501918   | 84501918 | O  | ADD  | 7370  | NA     | NA      | NA      | NA     | NA       | NA       |
| 16  | rs391525   | 84501940 | G  | ADD  | 7372  | 1.004  | 0.03795 | 0.9316  | 1.081  | 0.09273  | 0.9261   |
| 16  | rs366304   | 84502301 | A  | ADD  | 7315  | 0.7593 | 0.4966  | 0.2869  | 2.01   | -0.5545  | 0.5793   |
| 16  | rs2292982  | 84502324 | G  | ADD  | 7378  | 1.009  | 0.03801 | 0.9363  | 1.087  | 0.2281   | 0.8196   |
| 16  | 84502367   | 84502367 | O  | ADD  | 7333  | NA     | NA      | NA      | NA     | NA       | NA       |
| 16  | rs2292980  | 84502577 | C  | ADD  | 7377  | 1.011  | 0.03803 | 0.938   | 1.089  | 0.278    | 0.781    |
| 16  | 84502640   | 84502640 | A  | ADD  | 7382  | 1.889  | 0.7868  | 0.4043  | 8.831  | 0.8088   | 0.4187   |
| 16  | rs8052064  | 84502732 | T  | ADD  | 7185  | 0.815  | 0.05238 | 0.7355  | 0.9031 | -3.905   | 9.41E-05 |
| 16  | rs16939945 | 84502750 | T  | ADD  | 7344  | 0.8548 | 0.1072  | 0.6928  | 1.055  | -1.462   | 0.1436   |
| 16  | 84502870   | 84502870 | T  | ADD  | 7382  | 0.9649 | 0.8805  | 0.1718  | 5.42   | -0.0406  | 0.9676   |
| 16  | 84502888   | 84502888 | C  | ADD  | 7382  | 0.9649 | 0.8805  | 0.1718  | 5.42   | -0.0406  | 0.9676   |
| 16  | rs1519976  | 84503176 | G  | ADD  | 7361  | 1.002  | 0.03586 | 0.9338  | 1.075  | 0.04902  | 0.9609   |
| 16  | rs768410   | 84503229 | G  | ADD  | 7366  | 1.002  | 0.03586 | 0.9338  | 1.075  | 0.0502   | 0.96     |
| 16  | rs147968   | 84503340 | C  | ADD  | 7354  | 1.001  | 0.03587 | 0.9326  | 1.073  | 0.01472  | 0.9883   |
| 16  | 84503481   | 84503481 | O  | ADD  | 7381  | NA     | NA      | NA      | NA     | NA       | NA       |
| 16  | 84503489   | 84503489 | O  | ADD  | 7326  | NA     | NA      | NA      | NA     | NA       | NA       |
| 16  | rs925994   | 84503518 | A  | ADD  | 7357  | 1.223  | 0.09491 | 1.016   | 1.473  | 2.124    | 0.03367  |
| 16  | rs12923978 | 84503825 | C  | ADD  | 7254  | 1.137  | 0.0443  | 1.043   | 1.241  | 2.905    | 0.003669 |
| 16  | rs424971   | 84503951 | C  | ADD  | 7318  | 0.9972 | 0.03604 | 0.9292  | 1.07   | -0.0779  | 0.9379   |
| 16  | rs11649318 | 84503982 | C  | ADD  | 7368  | 0.9871 | 0.03687 | 0.9183  | 1.061  | -0.351   | 0.7256   |
| 16  | rs11863590 | 84503995 | G  | ADD  | 7260  | 1.14   | 0.04427 | 1.045   | 1.243  | 2.956    | 0.003121 |
| 16  | 84504494   | 84504494 | O  | ADD  | 7363  | NA     | NA      | NA      | NA     | NA       | NA       |
| 16  | 84504502   | 84504502 | O  | ADD  | 7376  | NA     | NA      | NA      | NA     | NA       | NA       |
| 16  | 84504605   | 84504605 | C  | ADD  | 7022  | 0.9816 | 0.05932 | 0.8739  | 1.103  | -0.3124  | 0.7548   |
| 16  | 84504608   | 84504608 | T  | ADD  | 7375  | 1.379  | 0.5991  | 0.4261  | 4.462  | 0.5362   | 0.5918   |
| 16  | 84504790   | 84504790 | O  | ADD  | 7384  | NA     | NA      | NA      | NA     | NA       | NA       |
| 16  | rs8051462  | 84504828 | G  | ADD  | 7354  | 1.004  | 0.03566 | 0.9364  | 1.077  | 0.116    | 0.9077   |
| 16  | rs8064111  | 84504976 | T  | ADD  | 7258  | 0.8538 | 0.05422 | 0.7678  | 0.9496 | -2.915   | 0.003562 |
| 16  | rs8047999  | 84505028 | C  | ADD  | 7368  | 0.9989 | 0.03563 | 0.9315  | 1.071  | -0.03062 | 0.9756   |
| 16  | 84505065   | 84505065 | C  | ADD  | 7359  | 0.4487 | 1.296   | 0.03537 | 5.691  | -0.6184  | 0.5363   |
| 16  | 84505099   | 84505099 | O  | ADD  | 7384  | NA     | NA      | NA      | NA     | NA       | NA       |
| 16  | 84505252   | 84505252 | A  | ADD  | 7234  | 1.263  | 0.1865  | 0.8765  | 1.821  | 1.253    | 0.2102   |
| 16  | rs903202   | 84505280 | C  | ADD  | 7269  | 0.9984 | 0.03565 | 0.931   | 1.071  | -0.04623 | 0.9631   |
| 16  | rs13331970 | 84505479 | A  | ADD  | 7354  | 1.036  | 0.3756  | 0.4963  | 2.163  | 0.09464  | 0.9246   |

| CHR | SNP        | BP       | A1 | TEST | NMISS | OR     | SE      | L95     | U95    | STAT      | P         |
|-----|------------|----------|----|------|-------|--------|---------|---------|--------|-----------|-----------|
| 16  | rs17444416 | 84505599 | A  | ADD  | 7373  | 1.035  | 0.07386 | 0.8954  | 1.196  | 0.4645    | 0.6423    |
| 16  | 84505753   | 84505753 | G  | ADD  | 7367  | 1.225  | 0.6091  | 0.3712  | 4.042  | 0.3331    | 0.739     |
| 16  | rs11649271 | 84505830 | C  | ADD  | 7328  | 0.8257 | 0.05208 | 0.7456  | 0.9144 | -3.678    | 0.0002354 |
| 16  | 84505980   | 84505980 | O  | ADD  | 7382  | NA     | NA      | NA      | NA     | NA        | NA        |
| 16  | rs903203   | 84506142 | A  | ADD  | 7006  | 1.103  | 0.03777 | 1.024   | 1.188  | 2.6       | 0.009332  |
| 16  | 84506417   | 84506417 | T  | ADD  | 7374  | 1.222  | 0.6093  | 0.3703  | 4.034  | 0.3292    | 0.742     |
| 16  | rs403038   | 84506572 | A  | ADD  | 7377  | 0.8252 | 0.05119 | 0.7464  | 0.9123 | -3.753    | 0.0001751 |
| 16  | rs8054513  | 84506608 | G  | ADD  | 7362  | 0.8231 | 0.05177 | 0.7437  | 0.911  | -3.761    | 0.000169  |
| 16  | rs8059127  | 84506690 | A  | ADD  | 7364  | 1.081  | 0.3353  | 0.5603  | 2.086  | 0.2322    | 0.8164    |
| 16  | rs62052557 | 84506707 | A  | ADD  | 6911  | 0.7744 | 0.4367  | 0.3291  | 1.822  | -0.5855   | 0.5582    |
| 16  | rs305071   | 84506772 | A  | ADD  | 7091  | 0.8133 | 0.05524 | 0.7299  | 0.9064 | -3.74     | 0.000184  |
| 16  | rs28552575 | 84506805 | T  | ADD  | 7366  | 0.8835 | 0.3976  | 0.4053  | 1.926  | -0.3115   | 0.7554    |
| 16  | 84506880   | 84506880 | C  | ADD  | 7333  | 1.104  | 0.2424  | 0.6867  | 1.776  | 0.4097    | 0.682     |
| 16  | rs305070   | 84506925 | G  | ADD  | 7372  | 0.8342 | 0.05023 | 0.756   | 0.9205 | -3.608    | 0.0003082 |
| 16  | rs9928776  | 84506960 | T  | ADD  | 7366  | 0.9992 | 0.3933  | 0.4623  | 2.16   | -0.002155 | 0.9983    |
| 16  | rs16939967 | 84506974 | T  | ADD  | 7376  | 1.113  | 0.04616 | 1.017   | 1.219  | 2.325     | 0.02005   |
| 16  | rs305069   | 84507059 | C  | ADD  | 7216  | 1.006  | 0.03577 | 0.9381  | 1.079  | 0.1741    | 0.8618    |
| 16  | rs35819447 | 84507211 | G  | ADD  | 7081  | 1.436  | 1.082   | 0.1721  | 11.99  | 0.3346    | 0.738     |
| 16  | 84507230   | 84507230 | O  | ADD  | 7384  | NA     | NA      | NA      | NA     | NA        | NA        |
| 16  | rs305068   | 84507397 | G  | ADD  | 7328  | 0.8243 | 0.05185 | 0.7446  | 0.9125 | -3.727    | 0.0001938 |
| 16  | rs16939969 | 84507645 | C  | ADD  | 7371  | 0.9492 | 0.3138  | 0.5131  | 1.756  | -0.1661   | 0.8681    |
| 16  | rs28631400 | 84507948 | T  | ADD  | 7372  | 0.7724 | 0.3676  | 0.3758  | 1.588  | -0.7024   | 0.4824    |
| 16  | rs28407896 | 84507957 | T  | ADD  | 7372  | 0.7724 | 0.3676  | 0.3758  | 1.588  | -0.7024   | 0.4824    |
| 16  | 84508024   | 84508024 | O  | ADD  | 7384  | NA     | NA      | NA      | NA     | NA        | NA        |
| 16  | rs11117415 | 84508187 | G  | ADD  | 7370  | 1.194  | 0.07628 | 1.028   | 1.386  | 2.324     | 0.02013   |
| 16  | 84508204   | 84508204 | O  | ADD  | 7382  | NA     | NA      | NA      | NA     | NA        | NA        |
| 16  | rs4843860  | 84508422 | G  | ADD  | 7349  | 1.065  | 0.038   | 0.9884  | 1.147  | 1.652     | 0.09855   |
| 16  | rs4843861  | 84508477 | T  | ADD  | 7375  | 1.064  | 0.03789 | 0.9881  | 1.146  | 1.643     | 0.1004    |
| 16  | rs9926067  | 84508696 | G  | ADD  | 7375  | 0.8515 | 0.3282  | 0.4475  | 1.62   | -0.4899   | 0.6242    |
| 16  | rs12926854 | 84508759 | G  | ADD  | 7338  | 1.061  | 0.03798 | 0.9851  | 1.143  | 1.565     | 0.1176    |
| 16  | rs8054065  | 84508855 | A  | ADD  | 7287  | 1.042  | 0.03564 | 0.9719  | 1.118  | 1.16      | 0.2462    |
| 16  | 84508893   | 84508893 | O  | ADD  | 7248  | NA     | NA      | NA      | NA     | NA        | NA        |
| 16  | rs8046526  | 84509136 | T  | ADD  | 7370  | 0.7919 | 0.04808 | 0.7207  | 0.8702 | -4.853    | 1.22E-06  |
| 16  | rs9934699  | 84509137 | A  | ADD  | 7326  | 1.172  | 0.06771 | 1.026   | 1.338  | 2.345     | 0.01903   |
| 16  | rs9934701  | 84509148 | A  | ADD  | 7326  | 1.172  | 0.06771 | 1.026   | 1.338  | 2.345     | 0.01903   |
| 16  | rs9926411  | 84509158 | G  | ADD  | 7378  | 1.203  | 0.126   | 0.9397  | 1.54   | 1.467     | 0.1425    |
| 16  | rs8058904  | 84509183 | G  | ADD  | 7359  | 0.7932 | 0.04818 | 0.7217  | 0.8718 | -4.808    | 1.53E-06  |
| 16  | rs9924484  | 84509239 | G  | ADD  | 7331  | 1.184  | 0.06764 | 1.037   | 1.352  | 2.494     | 0.01264   |
| 16  | rs9924488  | 84509249 | G  | ADD  | 7331  | 1.062  | 0.03788 | 0.9862  | 1.144  | 1.593     | 0.1112    |
| 16  | rs8064189  | 84509297 | G  | ADD  | 7264  | 0.8875 | 0.04206 | 0.8173  | 0.9638 | -2.837    | 0.004548  |
| 16  | 84509524   | 84509524 | O  | ADD  | 6664  | NA     | NA      | NA      | NA     | NA        | NA        |
| 16  | 84509646   | 84509646 | O  | ADD  | 7203  | NA     | NA      | NA      | NA     | NA        | NA        |
| 16  | rs28368114 | 84509781 | A  | ADD  | 7118  | 0.7969 | 0.5652  | 0.2632  | 2.413  | -0.4016   | 0.688     |
| 16  | rs61995933 | 84509816 | T  | ADD  | 7327  | 2.592  | 1.277   | 0.212   | 31.69  | 0.7455    | 0.4559    |
| 16  | 84510111   | 84510111 | O  | ADD  | 7384  | NA     | NA      | NA      | NA     | NA        | NA        |
| 16  | 84510173   | 84510173 | C  | ADD  | 7231  | 0.6859 | 1.416   | 0.04279 | 10.99  | -0.2663   | 0.79      |
| 16  | rs2280378  | 84510246 | G  | ADD  | 7341  | 0.9923 | 0.03529 | 0.926   | 1.063  | -0.2179   | 0.8275    |
| 16  | rs7185022  | 84510430 | A  | ADD  | 7315  | 1.005  | 0.03567 | 0.9372  | 1.078  | 0.1412    | 0.8877    |
| 16  | rs13338943 | 84510452 | T  | ADD  | 7383  | 0.9926 | 0.05354 | 0.8937  | 1.102  | -0.1395   | 0.8891    |
| 16  | rs12929551 | 84510511 | T  | ADD  | 7370  | 1.095  | 0.046   | 1       | 1.198  | 1.964     | 0.04956   |
| 16  | 84510613   | 84510613 | T  | ADD  | 7362  | 6.345  | 0.7967  | 1.331   | 30.24  | 2.319     | 0.02039   |
| 16  | rs16939994 | 84510669 | G  | ADD  | 7363  | 1.173  | 0.1313  | 0.907   | 1.518  | 1.217     | 0.2237    |
| 16  | rs8057456  | 84510697 | T  | ADD  | 7169  | 1.002  | 0.03728 | 0.9309  | 1.077  | 0.0405    | 0.9677    |

| CHR | SNP        | BP       | A1 | TEST | NMISS | OR       | SE       | L95    | U95    | STAT       | P        |
|-----|------------|----------|----|------|-------|----------|----------|--------|--------|------------|----------|
| 16  | 84510714   | 84510714 | C  | ADD  | 7324  | 2.68E-09 | 2.44E+04 | 0      | inf    | -0.0008096 | 0.9994   |
| 16  | 84510896   | 84510896 | A  | ADD  | 7029  | 1.035    | 0.1328   | 0.7978 | 1.343  | 0.2583     | 0.7962   |
| 16  | 84510938   | 84510938 | O  | ADD  | 7354  | NA       | NA       | NA     | NA     | NA         | NA       |
| 16  | rs9927932  | 84510947 | T  | ADD  | 7383  | 1.54     | 0.3686   | 0.7477 | 3.172  | 1.171      | 0.2415   |
| 16  | rs11866752 | 84510994 | T  | ADD  | 7374  | 1.593    | 0.4407   | 0.6716 | 3.78   | 1.057      | 0.2906   |
| 16  | rs28368115 | 84511122 | T  | ADD  | 7351  | 1.115    | 0.1352   | 0.8552 | 1.453  | 0.8031     | 0.4219   |
| 16  | rs16940005 | 84511183 | C  | ADD  | 7324  | 1.114    | 0.04638  | 1.017  | 1.22   | 2.326      | 0.02001  |
| 16  | 84511331   | 84511331 | O  | ADD  | 7384  | NA       | NA       | NA     | NA     | NA         | NA       |
| 16  | rs35593615 | 84511410 | G  | ADD  | 7353  | 1.105    | 0.04608  | 1.009  | 1.209  | 2.157      | 0.03099  |
| 16  | rs3751712  | 84511456 | C  | ADD  | 6711  | 0.9545   | 0.03846  | 0.8852 | 1.029  | -1.21      | 0.2264   |
| 16  | 84511483   | 84511483 | A  | ADD  | 5862  | 0.9904   | 0.2238   | 0.6387 | 1.536  | -0.0431    | 0.9656   |
| 16  | rs4843321  | 84511577 | C  | ADD  | 7194  | 0.9629   | 0.03739  | 0.8949 | 1.036  | -1.011     | 0.312    |
| 16  | 84511720   | 84511720 | G  | ADD  | 7379  | 8.56     | 1.107    | 0.9778 | 74.93  | 1.94       | 0.05242  |
| 16  | rs16940007 | 84511788 | T  | ADD  | 7379  | 3.87E-10 | 2.44E+04 | 0      | inf    | -0.000889  | 0.9993   |
| 16  | rs16940009 | 84512089 | C  | ADD  | 7381  | 2.49     | 0.5166   | 0.9047 | 6.854  | 1.766      | 0.07738  |
| 16  | 84512224   | 84512224 | T  | ADD  | 7382  | 1.23E+09 | 2.44E+04 | 0      | inf    | 0.0008586  | 0.9993   |
| 16  | rs2270503  | 84512302 | A  | ADD  | 7374  | 0.6783   | 0.9293   | 0.1098 | 4.192  | -0.4177    | 0.6762   |
| 16  | 84512462   | 84512462 | O  | ADD  | 7377  | NA       | NA       | NA     | NA     | NA         | NA       |
| 16  | 84512553   | 84512553 | O  | ADD  | 7382  | NA       | NA       | NA     | NA     | NA         | NA       |
| 16  | 84512648   | 84512648 | A  | ADD  | 7378  | 2.741    | 1.35     | 0.1944 | 38.64  | 0.7469     | 0.4551   |
| 16  | rs28368116 | 84512695 | C  | ADD  | 7325  | 0.6321   | 0.2622   | 0.3781 | 1.057  | -1.75      | 0.08019  |
| 16  | rs10514611 | 84512743 | T  | ADD  | 7324  | 0.8742   | 0.04331  | 0.803  | 0.9516 | -3.105     | 0.001905 |
| 16  | rs1568391  | 84512805 | G  | ADD  | 7084  | 1.024    | 0.03619  | 0.9537 | 1.099  | 0.6515     | 0.5147   |
| 16  | rs305072   | 84513164 | G  | ADD  | 7368  | 1.059    | 0.1268   | 0.8258 | 1.357  | 0.4504     | 0.6524   |
| 16  | rs1044873  | 84513172 | A  | ADD  | 7242  | 0.9668   | 0.03731  | 0.8986 | 1.04   | -0.9041    | 0.3659   |
| 16  | 84513230   | 84513230 | A  | ADD  | 7040  | 1.028    | 0.03626  | 0.9571 | 1.103  | 0.7504     | 0.453    |
| 16  | 84513410   | 84513410 | G  | ADD  | 7373  | 0.6785   | 0.9292   | 0.1098 | 4.193  | -0.4174    | 0.6764   |
| 16  | rs28368119 | 84513449 | T  | ADD  | 7116  | 0.7448   | 0.2199   | 0.484  | 1.146  | -1.34      | 0.1803   |
| 16  | 84513495   | 84513495 | O  | ADD  | 7384  | NA       | NA       | NA     | NA     | NA         | NA       |
| 16  | rs6638     | 84513545 | A  | ADD  | 7031  | 1.033    | 0.03626  | 0.9625 | 1.11   | 0.9066     | 0.3646   |
| 16  | 84513863   | 84513863 | C  | ADD  | 2106  | 1.015    | 0.07032  | 0.8846 | 1.165  | 0.2156     | 0.8293   |
| 16  | rs11646027 | 84513898 | C  | ADD  | 7350  | 0.8814   | 0.04289  | 0.8103 | 0.9587 | -2.944     | 0.003243 |
| 16  | rs28368120 | 84514144 | T  | ADD  | 7370  | 1.12     | 0.1285   | 0.871  | 1.441  | 0.8846     | 0.3764   |
| 16  | 84514396   | 84514396 | C  | ADD  | 6977  | 1.368    | 0.2047   | 0.9155 | 2.043  | 1.529      | 0.1263   |
| 16  | rs7204286  | 84514422 | T  | ADD  | 7237  | 0.8854   | 0.04316  | 0.8136 | 0.9636 | -2.82      | 0.0048   |
| 16  | rs1021479  | 84514915 | C  | ADD  | 7367  | 1.133    | 0.1261   | 0.885  | 1.451  | 0.9911     | 0.3216   |
| 16  | 84514923   | 84514923 | O  | ADD  | 7375  | NA       | NA       | NA     | NA     | NA         | NA       |
| 16  | rs305073   | 84515294 | T  | ADD  | 7272  | 0.9894   | 0.0368   | 0.9206 | 1.063  | -0.2886    | 0.7729   |
| 16  | rs305074   | 84515321 | C  | ADD  | 7276  | 0.9893   | 0.03659  | 0.9208 | 1.063  | -0.2939    | 0.7689   |
| 16  | rs9932835  | 84515425 | G  | ADD  | 7348  | 0.8862   | 0.04288  | 0.8147 | 0.9639 | -2.819     | 0.004823 |
| 16  | rs11117416 | 84515825 | G  | ADD  | 7382  | 0.886    | 0.0428   | 0.8147 | 0.9635 | -2.828     | 0.00469  |
| 16  | 84516049   | 84516049 | O  | ADD  | 7275  | NA       | NA       | NA     | NA     | NA         | NA       |
| 16  | 84516201   | 84516201 | T  | ADD  | 7383  | 2.36E-09 | 2.44E+04 | 0      | inf    | -0.0008149 | 0.9993   |
| 16  | rs16940023 | 84516215 | T  | ADD  | 7368  | 1.093    | 0.1245   | 0.8564 | 1.395  | 0.7149     | 0.4747   |
| 16  | rs8052521  | 84516230 | A  | ADD  | 7372  | 0.9008   | 0.04141  | 0.8306 | 0.977  | -2.522     | 0.01167  |
| 16  | rs1021480  | 84516471 | G  | ADD  | 7295  | 0.9082   | 0.04167  | 0.837  | 0.9855 | -2.31      | 0.02086  |
| 16  | rs1021481  | 84516521 | A  | ADD  | 7370  | 0.9058   | 0.04146  | 0.8351 | 0.9825 | -2.387     | 0.017    |
| 16  | rs880364   | 84516666 | G  | ADD  | 7377  | 0.9086   | 0.04141  | 0.8378 | 0.9854 | -2.314     | 0.02065  |
| 16  | rs880365   | 84516863 | T  | ADD  | 7380  | 0.9029   | 0.04149  | 0.8324 | 0.9794 | -2.462     | 0.0138   |
| 16  | rs880366   | 84516939 | C  | ADD  | 7379  | 0.9074   | 0.0414   | 0.8367 | 0.9841 | -2.348     | 0.0189   |
| 16  | 84517038   | 84517038 | O  | ADD  | 7362  | NA       | NA       | NA     | NA     | NA         | NA       |
| 16  | 84517061   | 84517061 | O  | ADD  | 7356  | NA       | NA       | NA     | NA     | NA         | NA       |
| 16  | 84517099   | 84517099 | O  | ADD  | 7384  | NA       | NA       | NA     | NA     | NA         | NA       |

| CHR | SNP        | BP       | A1 | TEST | NMISS | OR       | SE       | L95     | U95    | STAT      | P         |
|-----|------------|----------|----|------|-------|----------|----------|---------|--------|-----------|-----------|
| 16  | rs305075   | 84517136 | T  | ADD  | 7370  | 1.026    | 0.03565  | 0.9569  | 1.1    | 0.7252    | 0.4683    |
| 16  | 84517710   | 84517710 | O  | ADD  | 7380  | NA       | NA       | NA      | NA     | NA        | NA        |
| 16  | rs11644411 | 84517732 | C  | ADD  | 7305  | 0.892    | 0.04296  | 0.82    | 0.9704 | -2.66     | 0.007805  |
| 16  | rs11648480 | 84517780 | T  | ADD  | 7321  | 0.8925   | 0.04298  | 0.8204  | 0.9709 | -2.647    | 0.00812   |
| 16  | 84517870   | 84517870 | A  | ADD  | 7173  | 1.217    | 0.1324   | 0.9387  | 1.577  | 1.482     | 0.1384    |
| 16  | 84517901   | 84517901 | C  | ADD  | 7370  | 0.4425   | 0.5654   | 0.1461  | 1.34   | -1.442    | 0.1492    |
| 16  | rs1472235  | 84518468 | A  | ADD  | 7225  | 0.9351   | 0.03906  | 0.8662  | 1.009  | -1.718    | 0.08579   |
| 16  | 84518535   | 84518535 | T  | ADD  | 6930  | 0.6781   | 0.5074   | 0.2508  | 1.833  | -0.7656   | 0.4439    |
| 16  | rs1038953  | 84518591 | A  | ADD  | 6837  | 1.389    | 0.2587   | 0.8367  | 2.306  | 1.271     | 0.2039    |
| 16  | 84518682   | 84518682 | A  | ADD  | 7308  | 1.599    | 0.5049   | 0.5942  | 4.301  | 0.9291    | 0.3528    |
| 16  | 84518866   | 84518866 | C  | ADD  | 7307  | 1.351    | 0.9629   | 0.2046  | 8.916  | 0.3122    | 0.7549    |
| 16  | rs4843862  | 84518960 | G  | ADD  | 5557  | 0.9838   | 0.04029  | 0.9091  | 1.065  | -0.4051   | 0.6854    |
| 16  | rs17444745 | 84519063 | A  | ADD  | 7379  | 1.017    | 0.04621  | 0.9289  | 1.113  | 0.3648    | 0.7152    |
| 16  | 84519295   | 84519295 | T  | ADD  | 7381  | 8.566    | 1.107    | 0.9785  | 74.99  | 1.94      | 0.05234   |
| 16  | 84519403   | 84519403 | G  | ADD  | 7307  | 1.209    | 0.3264   | 0.6378  | 2.293  | 0.5823    | 0.5604    |
| 16  | 84519498   | 84519498 | G  | ADD  | 7374  | 0.4565   | 0.8881   | 0.08007 | 2.603  | -0.8829   | 0.3773    |
| 16  | 84519800   | 84519800 | C  | ADD  | 7363  | 2.29     | 0.8606   | 0.4239  | 12.37  | 0.9628    | 0.3356    |
| 16  | rs305076   | 84519862 | C  | ADD  | 7360  | 5.93     | 1.15     | 0.6223  | 56.51  | 1.548     | 0.1217    |
| 16  | 84520081   | 84520081 | O  | ADD  | 7373  | NA       | NA       | NA      | NA     | NA        | NA        |
| 16  | 84520237   | 84520237 | C  | ADD  | 7374  | 1.675    | 1.157    | 0.1736  | 16.16  | 0.4461    | 0.6556    |
| 16  | 84520351   | 84520351 | C  | ADD  | 6595  | 1.039    | 0.09837  | 0.8568  | 1.26   | 0.3886    | 0.6976    |
| 16  | 84520516   | 84520516 | A  | ADD  | 6580  | 1.041    | 0.09742  | 0.8603  | 1.26   | 0.4149    | 0.6782    |
| 16  | 84520518   | 84520518 | O  | ADD  | 7377  | NA       | NA       | NA      | NA     | NA        | NA        |
| 16  | 84520604   | 84520604 | O  | ADD  | 7384  | NA       | NA       | NA      | NA     | NA        | NA        |
| 16  | 84521376   | 84521376 | T  | ADD  | 7046  | 1.66     | 0.2919   | 0.937   | 2.942  | 1.737     | 0.08238   |
| 16  | 84521433   | 84521433 | O  | ADD  | 7384  | NA       | NA       | NA      | NA     | NA        | NA        |
| 16  | 84521580   | 84521580 | G  | ADD  | 7357  | 5.056    | 0.8015   | 1.051   | 24.33  | 2.022     | 0.04318   |
| 16  | 84521632   | 84521632 | T  | ADD  | 7285  | 0.7216   | 1.212    | 0.06713 | 7.757  | -0.2693   | 0.7877    |
| 16  | 84521737   | 84521737 | O  | ADD  | 7384  | NA       | NA       | NA      | NA     | NA        | NA        |
| 16  | rs12598785 | 84521809 | G  | ADD  | 7328  | 1.047    | 0.05193  | 0.9454  | 1.159  | 0.8788    | 0.3795    |
| 16  | rs60218704 | 84521854 | C  | ADD  | 7359  | 8.616    | 1.107    | 0.9833  | 75.49  | 1.945     | 0.05181   |
| 16  | rs8045988  | 84521891 | A  | ADD  | 7381  | 1.126    | 0.07226  | 0.9772  | 1.297  | 1.641     | 0.1008    |
| 16  | rs366078   | 84522064 | C  | ADD  | 7365  | 0.8268   | 0.05261  | 0.7458  | 0.9166 | -3.615    | 0.0003    |
| 16  | rs2172625  | 84522286 | C  | ADD  | 7226  | 0.8115   | 0.05375  | 0.7304  | 0.9017 | -3.885    | 0.0001021 |
| 16  | rs2970094  | 84522327 | A  | ADD  | 6845  | 0.8234   | 0.05363  | 0.7413  | 0.9147 | -3.623    | 0.0002913 |
| 16  | 84522420   | 84522420 | A  | ADD  | 7316  | 0.7129   | 1.422    | 0.04391 | 11.57  | -0.238    | 0.8119    |
| 16  | 84522462   | 84522462 | O  | ADD  | 7374  | NA       | NA       | NA      | NA     | NA        | NA        |
| 16  | rs399280   | 84522499 | G  | ADD  | 7231  | 0.8523   | 0.0533   | 0.7677  | 0.9461 | -2.999    | 0.002706  |
| 16  | rs383425   | 84522540 | T  | ADD  | 7363  | 1.157    | 0.0355   | 1.079   | 1.24   | 4.097     | 4.19E-05  |
| 16  | 84522577   | 84522577 | C  | ADD  | 7356  | 0.8427   | 0.05334  | 0.7591  | 0.9356 | -3.207    | 0.00134   |
| 16  | 84522585   | 84522585 | C  | ADD  | 7122  | 1.667    | 0.365    | 0.8153  | 3.409  | 1.401     | 0.1614    |
| 16  | rs56200928 | 84522852 | C  | ADD  | 7069  | 1.499    | 0.1904   | 1.032   | 2.178  | 2.128     | 0.03337   |
| 16  | 84522867   | 84522867 | O  | ADD  | 7384  | NA       | NA       | NA      | NA     | NA        | NA        |
| 16  | 84522980   | 84522980 | A  | ADD  | 7370  | 1.349    | 1.556    | 0.0639  | 28.46  | 0.1922    | 0.8476    |
| 16  | rs523642   | 84523096 | A  | ADD  | 7343  | 0.8442   | 0.05351  | 0.7602  | 0.9376 | -3.165    | 0.001552  |
| 16  | rs524432   | 84523155 | C  | ADD  | 7381  | 0.8451   | 0.053    | 0.7618  | 0.9377 | -3.175    | 0.0015    |
| 16  | 84523165   | 84523165 | A  | ADD  | 7374  | 0.6343   | 0.284    | 0.3635  | 1.107  | -1.603    | 0.109     |
| 16  | 84523216   | 84523216 | T  | ADD  | 7369  | 5.03E+09 | 2.44E+04 | 0       | inf    | 0.0009164 | 0.9993    |
| 16  | rs388988   | 84523302 | T  | ADD  | 7322  | 0.8358   | 0.05312  | 0.7532  | 0.9275 | -3.376    | 0.0007349 |
| 16  | 84523320   | 84523320 | O  | ADD  | 7377  | NA       | NA       | NA      | NA     | NA        | NA        |
| 16  | rs73266819 | 84523372 | C  | ADD  | 7377  | 0.8951   | 0.797    | 0.1877  | 4.269  | -0.1391   | 0.8894    |
| 16  | 84523433   | 84523433 | C  | ADD  | 7120  | 0.8345   | 0.05612  | 0.7476  | 0.9316 | -3.223    | 0.001268  |
| 16  | rs411221   | 84523460 | C  | ADD  | 7207  | 0.837    | 0.05377  | 0.7533  | 0.93   | -3.31     | 0.0009342 |

| CHR | SNP        | BP       | A1 | TEST | NMISS | OR       | SE       | L95    | U95    | STAT       | P         |
|-----|------------|----------|----|------|-------|----------|----------|--------|--------|------------|-----------|
| 16  | 84523472   | 84523472 | 0  | ADD  | 7384  | NA       | NA       | NA     | NA     | NA         | NA        |
| 16  | 84523510   | 84523510 | 0  | ADD  | 7375  | NA       | NA       | NA     | NA     | NA         | NA        |
| 16  | rs878453   | 84523664 | C  | ADD  | 7111  | 0.9404   | 0.03907  | 0.8711 | 1.015  | -1.573     | 0.1157    |
| 16  | rs878454   | 84523673 | A  | ADD  | 7347  | 0.8555   | 0.05078  | 0.7745 | 0.9451 | -3.072     | 0.002125  |
| 16  | rs903201   | 84523785 | C  | ADD  | 7293  | 1.057    | 0.05407  | 0.9509 | 1.175  | 1.029      | 0.3034    |
| 16  | rs11861479 | 84523794 | G  | ADD  | 7295  | 1.057    | 0.05407  | 0.9507 | 1.175  | 1.026      | 0.3051    |
| 16  | rs11117417 | 84523830 | T  | ADD  | 7296  | 1.061    | 0.0541   | 0.954  | 1.179  | 1.09       | 0.2758    |
| 16  | rs58980382 | 84523934 | T  | ADD  | 7109  | 0.791    | 0.05684  | 0.7076 | 0.8842 | -4.125     | 3.71E-05  |
| 16  | rs11860480 | 84523959 | C  | ADD  | 7367  | 0.9181   | 0.04165  | 0.8461 | 0.9961 | -2.053     | 0.04011   |
| 16  | rs11860517 | 84524000 | G  | ADD  | 7362  | 1.071    | 0.05355  | 0.9639 | 1.189  | 1.273      | 0.2031    |
| 16  | rs11117418 | 84524028 | G  | ADD  | 7360  | 1.034    | 0.05096  | 0.936  | 1.143  | 0.6612     | 0.5085    |
| 16  | rs12051539 | 84524038 | G  | ADD  | 7260  | 1.211    | 0.1503   | 0.9017 | 1.625  | 1.272      | 0.2035    |
| 16  | 84524043   | 84524043 | A  | ADD  | 7169  | 0.9702   | 0.1271   | 0.7563 | 1.245  | -0.2383    | 0.8116    |
| 16  | 84524049   | 84524049 | G  | ADD  | 7232  | 0.7988   | 0.05499  | 0.7172 | 0.8898 | -4.084     | 4.43E-05  |
| 16  | 84524139   | 84524139 | 0  | ADD  | 7372  | NA       | NA       | NA     | NA     | NA         | NA        |
| 16  | rs13332649 | 84524184 | G  | ADD  | 7133  | 0.7909   | 0.04754  | 0.7205 | 0.8681 | -4.935     | 8.02E-07  |
| 16  | rs875529   | 84524187 | C  | ADD  | 7346  | 1.066    | 0.05357  | 0.9597 | 1.184  | 1.192      | 0.2334    |
| 16  | rs875528   | 84524211 | A  | ADD  | 7260  | 1.28     | 0.1478   | 0.9582 | 1.711  | 1.671      | 0.09464   |
| 16  | 84524220   | 84524220 | T  | ADD  | 7258  | 0.8067   | 0.184    | 0.5625 | 1.157  | -1.168     | 0.2429    |
| 16  | rs875527   | 84524231 | A  | ADD  | 7380  | 1.307    | 0.1484   | 0.977  | 1.748  | 1.803      | 0.07134   |
| 16  | rs419030   | 84524302 | A  | ADD  | 7235  | 0.6531   | 0.2248   | 0.4203 | 1.015  | -1.895     | 0.05807   |
| 16  | 84524389   | 84524389 | 0  | ADD  | 7383  | NA       | NA       | NA     | NA     | NA         | NA        |
| 16  | 84524454   | 84524454 | C  | ADD  | 7058  | 0.6726   | 0.8193   | 0.135  | 3.35   | -0.4842    | 0.6283    |
| 16  | 84524516   | 84524516 | C  | ADD  | 7374  | 1.387    | 0.6158   | 0.4148 | 4.636  | 0.5311     | 0.5953    |
| 16  | rs12596341 | 84524541 | A  | ADD  | 7354  | 1.015    | 0.05738  | 0.9067 | 1.135  | 0.2534     | 0.8       |
| 16  | rs7198271  | 84524586 | G  | ADD  | 7340  | 1.006    | 0.5367   | 0.3515 | 2.881  | 0.01163    | 0.9907    |
| 16  | 84524664   | 84524664 | C  | ADD  | 6883  | 1.009    | 0.06215  | 0.8929 | 1.139  | 0.1371     | 0.891     |
| 16  | 84524665   | 84524665 | C  | ADD  | 7221  | 1.023    | 0.0561   | 0.9167 | 1.142  | 0.4094     | 0.6823    |
| 16  | 84524666   | 84524666 | C  | ADD  | 7221  | 1.023    | 0.0561   | 0.9167 | 1.142  | 0.4094     | 0.6823    |
| 16  | 84524668   | 84524668 | C  | ADD  | 7188  | 1.022    | 0.05612  | 0.9159 | 1.141  | 0.3938     | 0.6937    |
| 16  | 84524687   | 84524687 | C  | ADD  | 4204  | 0.7977   | 0.1376   | 0.6091 | 1.045  | -1.642     | 0.1006    |
| 16  | 84524706   | 84524706 | C  | ADD  | 3245  | 0.9199   | 0.09125  | 0.7693 | 1.1    | -0.9144    | 0.3605    |
| 16  | 84524707   | 84524707 | C  | ADD  | 2830  | 0.878    | 0.1138   | 0.7025 | 1.097  | -1.144     | 0.2527    |
| 16  | 84524722   | 84524722 | C  | ADD  | 6040  | 0.9413   | 0.2171   | 0.6151 | 1.441  | -0.2785    | 0.7806    |
| 16  | 84524723   | 84524723 | C  | ADD  | 6016  | 0.9416   | 0.217    | 0.6153 | 1.441  | -0.2775    | 0.7814    |
| 16  | 84524750   | 84524750 | T  | ADD  | 7109  | 0.6713   | 0.1185   | 0.5322 | 0.8469 | -3.363     | 0.0007722 |
| 16  | rs12444221 | 84524786 | T  | ADD  | 7349  | 0.803    | 0.04567  | 0.7342 | 0.8782 | -4.805     | 1.55E-06  |
| 16  | 84524997   | 84524997 | 0  | ADD  | 7324  | NA       | NA       | NA     | NA     | NA         | NA        |
| 16  | rs437291   | 84525009 | C  | ADD  | 7335  | 1.066    | 0.05336  | 0.9605 | 1.184  | 1.205      | 0.2283    |
| 16  | 84525054   | 84525054 | 0  | ADD  | 7381  | NA       | NA       | NA     | NA     | NA         | NA        |
| 16  | 84525087   | 84525087 | T  | ADD  | 7057  | 1.514    | 0.347    | 0.7667 | 2.988  | 1.194      | 0.2323    |
| 16  | rs9936079  | 84525095 | A  | ADD  | 7013  | 0.7906   | 0.04655  | 0.7217 | 0.8661 | -5.048     | 4.47E-07  |
| 16  | rs385344   | 84525105 | G  | ADD  | 7362  | NA       | NA       | NA     | NA     | NA         | NA        |
| 16  | rs447632   | 84525141 | G  | ADD  | 7364  | 1.036    | 0.05609  | 0.9283 | 1.157  | 0.6341     | 0.526     |
| 16  | rs34337659 | 84525158 | C  | ADD  | 7373  | NA       | NA       | NA     | NA     | NA         | NA        |
| 16  | rs66509440 | 84525182 | T  | ADD  | 6937  | NA       | NA       | NA     | NA     | NA         | NA        |
| 16  | rs66804793 | 84525190 | A  | ADD  | 6938  | NA       | NA       | NA     | NA     | NA         | NA        |
| 16  | rs9925859  | 84525223 | C  | ADD  | 7340  | 1.144    | 0.04091  | 1.056  | 1.24   | 3.289      | 0.001006  |
| 16  | rs74032085 | 84525245 | C  | ADD  | 6800  | NA       | NA       | NA     | NA     | NA         | NA        |
| 16  | rs16940044 | 84525266 | G  | ADD  | 6780  | NA       | NA       | NA     | NA     | NA         | NA        |
| 16  | 84525360   | 84525360 | G  | ADD  | 7231  | 3.73E-10 | 2.44E+04 | 0      | inf    | -0.0008905 | 0.9993    |
| 16  | rs2934497  | 84525379 | T  | ADD  | 6759  | NA       | NA       | NA     | NA     | NA         | NA        |
| 16  | rs2970091  | 84525387 | A  | ADD  | 6845  | NA       | NA       | NA     | NA     | NA         | NA        |

| CHR | SNP        | BP       | A1 | TEST | NMISS | OR       | SE       | L95     | U95    | STAT      | P         |
|-----|------------|----------|----|------|-------|----------|----------|---------|--------|-----------|-----------|
| 16  | rs2970090  | 84525392 | A  | ADD  | 6825  | 1.085    | 0.05396  | 0.976   | 1.206  | 1.509     | 0.1312    |
| 16  | rs56239618 | 84525421 | G  | ADD  | 6808  | 0.8788   | 0.0752   | 0.7584  | 1.018  | -1.718    | 0.08581   |
| 16  | rs57439018 | 84525761 | C  | ADD  | 7370  | 0.8931   | 0.7972   | 0.1872  | 4.261  | -0.1418   | 0.8873    |
| 16  | 84525770   | 84525770 | A  | ADD  | 7378  | 1.12E+09 | 1.41E+04 | 0       | inf    | 0.001481  | 0.9988    |
| 16  | rs2934498  | 84525783 | G  | ADD  | 7372  | NA       | NA       | NA      | NA     | NA        | NA        |
| 16  | rs447919   | 84526058 | T  | ADD  | 7345  | 1.145    | 0.04096  | 1.057   | 1.241  | 3.309     | 0.0009378 |
| 16  | 84526080   | 84526080 | O  | ADD  | 7379  | NA       | NA       | NA      | NA     | NA        | NA        |
| 16  | 84526134   | 84526134 | O  | ADD  | 7372  | NA       | NA       | NA      | NA     | NA        | NA        |
| 16  | rs439885   | 84526175 | A  | ADD  | 7377  | NA       | NA       | NA      | NA     | NA        | NA        |
| 16  | rs10400953 | 84526344 | T  | ADD  | 7362  | 1.065    | 0.05367  | 0.959   | 1.184  | 1.181     | 0.2378    |
| 16  | 84526382   | 84526382 | T  | ADD  | 7373  | 7.39E-10 | 1.62E+04 | 0       | inf    | -0.001299 | 0.999     |
| 16  | rs450443   | 84526392 | G  | ADD  | 7384  | NA       | NA       | NA      | NA     | NA        | NA        |
| 16  | rs396987   | 84526435 | G  | ADD  | 7382  | NA       | NA       | NA      | NA     | NA        | NA        |
| 16  | rs385989   | 84526509 | G  | ADD  | 7313  | 1.047    | 0.05235  | 0.945   | 1.16   | 0.8789    | 0.3794    |
| 16  | 84526528   | 84526528 | A  | ADD  | 7310  | 1        | 0.2806   | 0.5771  | 1.733  | 0.0005739 | 0.9995    |
| 16  | rs4843865  | 84526806 | T  | ADD  | 7361  | 0.8073   | 0.04559  | 0.7383  | 0.8827 | -4.696    | 2.65E-06  |
| 16  | 84527141   | 84527141 | C  | ADD  | 7366  | 0.8082   | 0.04552  | 0.7392  | 0.8836 | -4.678    | 2.90E-06  |
| 16  | rs8052690  | 84527239 | G  | ADD  | 7378  | 0.8109   | 0.04548  | 0.7417  | 0.8865 | -4.61     | 4.02E-06  |
| 16  | rs7185692  | 84527553 | G  | ADD  | 7352  | 1.062    | 0.05375  | 0.9558  | 1.18   | 1.119     | 0.2633    |
| 16  | 84527600   | 84527600 | C  | ADD  | 3051  | 0.9739   | 0.06942  | 0.85    | 1.116  | -0.3804   | 0.7037    |
| 16  | 84527601   | 84527601 | A  | ADD  | 5818  | 1.163    | 0.05037  | 1.054   | 1.284  | 3.006     | 0.002647  |
| 16  | 84527603   | 84527603 | C  | ADD  | 4202  | 0.8866   | 0.05297  | 0.7992  | 0.9836 | -2.272    | 0.02309   |
| 16  | 84527612   | 84527612 | C  | ADD  | 7064  | 2.209    | 0.3878   | 1.033   | 4.724  | 2.044     | 0.04093   |
| 16  | 84527613   | 84527613 | T  | ADD  | 6735  | 1.669    | 0.3362   | 0.8633  | 3.225  | 1.523     | 0.1278    |
| 16  | 84527727   | 84527727 | O  | ADD  | 7258  | NA       | NA       | NA      | NA     | NA        | NA        |
| 16  | 84527829   | 84527829 | C  | ADD  | 7266  | 1.28     | 0.521    | 0.4612  | 3.555  | 0.4745    | 0.6351    |
| 16  | rs8059144  | 84527977 | C  | ADD  | 7335  | 0.8756   | 0.04087  | 0.8082  | 0.9487 | -3.249    | 0.001159  |
| 16  | rs8045825  | 84527979 | G  | ADD  | 7339  | 0.876    | 0.04087  | 0.8085  | 0.949  | -3.241    | 0.001191  |
| 16  | 84528014   | 84528014 | G  | ADD  | 7376  | 3.87E-10 | 2.44E+04 | 0       | inf    | -0.000889 | 0.9993    |
| 16  | 84528020   | 84528020 | T  | ADD  | 7341  | 0.4293   | 0.5704   | 0.1404  | 1.313  | -1.482    | 0.1382    |
| 16  | rs4843866  | 84528151 | T  | ADD  | 7339  | 0.8762   | 0.04087  | 0.8088  | 0.9493 | -3.233    | 0.001225  |
| 16  | rs4843867  | 84528219 | G  | ADD  | 7341  | 0.8761   | 0.04086  | 0.8087  | 0.9491 | -3.237    | 0.001207  |
| 16  | 84528233   | 84528233 | A  | ADD  | 7377  | 0.1269   | 1.092    | 0.01493 | 1.079  | -1.891    | 0.05869   |
| 16  | rs186249   | 84528397 | C  | ADD  | 7196  | 1.057    | 0.1809   | 0.7415  | 1.507  | 0.3066    | 0.7591    |
| 16  | 84528620   | 84528620 | O  | ADD  | 7384  | NA       | NA       | NA      | NA     | NA        | NA        |
| 16  | 84528669   | 84528669 | O  | ADD  | 7363  | NA       | NA       | NA      | NA     | NA        | NA        |
| 16  | rs12149636 | 84528721 | G  | ADD  | 7354  | 0.8725   | 0.04101  | 0.8052  | 0.9456 | -3.325    | 0.0008845 |
| 16  | 84528857   | 84528857 | C  | ADD  | 7151  | 0.8696   | 0.04219  | 0.8006  | 0.9446 | -3.311    | 0.0009292 |
| 16  | 84528860   | 84528860 | T  | ADD  | 6338  | 0.7729   | 0.05929  | 0.6881  | 0.8681 | -4.345    | 1.39E-05  |
| 16  | rs12149642 | 84528922 | T  | ADD  | 7073  | 0.8597   | 0.04228  | 0.7913  | 0.9339 | -3.576    | 0.0003488 |
| 16  | 84529014   | 84529014 | G  | ADD  | 7005  | 0.8772   | 0.1382   | 0.6691  | 1.15   | -0.9486   | 0.3428    |
| 16  | 84529016   | 84529016 | C  | ADD  | 3186  | 0.8385   | 0.07976  | 0.7171  | 0.9804 | -2.209    | 0.02719   |
| 16  | 84529025   | 84529025 | C  | ADD  | 5442  | 0.9362   | 0.07982  | 0.8006  | 1.095  | -0.8259   | 0.4089    |
| 16  | 84529026   | 84529026 | C  | ADD  | 5903  | 0.8155   | 0.05924  | 0.7261  | 0.9159 | -3.442    | 0.0005768 |
| 16  | 84529027   | 84529027 | C  | ADD  | 6495  | 0.8508   | 0.04719  | 0.7757  | 0.9333 | -3.423    | 0.0006191 |
| 16  | 84529028   | 84529028 | C  | ADD  | 6380  | 0.8779   | 0.046    | 0.8022  | 0.9607 | -2.831    | 0.004635  |
| 16  | 84529029   | 84529029 | C  | ADD  | 6685  | 0.8667   | 0.04372  | 0.7955  | 0.9442 | -3.272    | 0.001067  |
| 16  | 84529030   | 84529030 | C  | ADD  | 6685  | 0.8667   | 0.04372  | 0.7955  | 0.9442 | -3.272    | 0.001067  |
| 16  | 84529031   | 84529031 | C  | ADD  | 6390  | 0.8506   | 0.04443  | 0.7797  | 0.928  | -3.641    | 0.0002715 |
| 16  | rs12149223 | 84529032 | C  | ADD  | 5768  | 0.8834   | 0.122    | 0.6955  | 1.122  | -1.017    | 0.3094    |
| 16  | 84529037   | 84529037 | C  | ADD  | 6949  | 0.8562   | 0.2252   | 0.5506  | 1.331  | -0.6895   | 0.4905    |
| 16  | 84529038   | 84529038 | C  | ADD  | 7012  | 1.196    | 0.355    | 0.5965  | 2.399  | 0.5047    | 0.6137    |
| 16  | 84529220   | 84529220 | T  | ADD  | 7068  | 1.086    | 0.1469   | 0.8141  | 1.448  | 0.5594    | 0.5759    |

| CHR | SNP        | BP       | A1 | TEST | NMISS | OR       | SE       | L95     | U95    | STAT      | P         |
|-----|------------|----------|----|------|-------|----------|----------|---------|--------|-----------|-----------|
| 16  | 84529277   | 84529277 | 0  | ADD  | 7384  | NA       | NA       | NA      | NA     | NA        | NA        |
| 16  | rs305067   | 84529341 | C  | ADD  | 6738  | 1.125    | 0.04314  | 1.034   | 1.225  | 2.735     | 0.006243  |
| 16  | rs11117419 | 84529383 | G  | ADD  | 7350  | 0.8595   | 0.04159  | 0.7922  | 0.9325 | -3.64     | 0.0002723 |
| 16  | rs11117420 | 84529423 | C  | ADD  | 7123  | 0.8223   | 0.04872  | 0.7474  | 0.9046 | -4.017    | 5.90E-05  |
| 16  | rs11117421 | 84529461 | A  | ADD  | 7349  | 0.8592   | 0.0416   | 0.792   | 0.9322 | -3.647    | 0.0002653 |
| 16  | rs11117422 | 84529514 | C  | ADD  | 7267  | 0.7926   | 0.04665  | 0.7233  | 0.8685 | -4.982    | 6.28E-07  |
| 16  | 84529575   | 84529575 | 0  | ADD  | 7309  | NA       | NA       | NA      | NA     | NA        | NA        |
| 16  | rs11117423 | 84529682 | C  | ADD  | 7316  | 0.8595   | 0.04177  | 0.792   | 0.9329 | -3.624    | 0.0002903 |
| 16  | rs11117424 | 84529738 | G  | ADD  | 7368  | 0.861    | 0.04157  | 0.7936  | 0.9341 | -3.601    | 0.0003174 |
| 16  | rs11117425 | 84529772 | T  | ADD  | 7369  | 0.8614   | 0.04165  | 0.7939  | 0.9347 | -3.582    | 0.0003413 |
| 16  | rs11648012 | 84529908 | T  | ADD  | 7365  | 0.8597   | 0.04156  | 0.7924  | 0.9326 | -3.638    | 0.0002748 |
| 16  | 84530040   | 84530040 | T  | ADD  | 7370  | 0.77     | 1.416    | 0.04799 | 12.36  | -0.1845   | 0.8536    |
| 16  | rs11643999 | 84530070 | A  | ADD  | 7373  | 0.8589   | 0.04157  | 0.7917  | 0.9318 | -3.66     | 0.0002525 |
| 16  | rs11648084 | 84530099 | T  | ADD  | 7379  | 0.8597   | 0.04159  | 0.7924  | 0.9327 | -3.634    | 0.0002792 |
| 16  | rs11644034 | 84530113 | A  | ADD  | 7328  | 0.7999   | 0.04645  | 0.7303  | 0.8762 | -4.805    | 1.55E-06  |
| 16  | rs16940083 | 84530130 | T  | ADD  | 7379  | 0.7001   | 0.7662   | 0.156   | 3.143  | -0.4653   | 0.6417    |
| 16  | 84530187   | 84530187 | 0  | ADD  | 7223  | NA       | NA       | NA      | NA     | NA        | NA        |
| 16  | rs305066   | 84530277 | T  | ADD  | 7304  | 1.159    | 0.09733  | 0.9577  | 1.402  | 1.515     | 0.1297    |
| 16  | rs12600127 | 84530280 | G  | ADD  | 7329  | 0.8568   | 0.04169  | 0.7896  | 0.9298 | -3.706    | 0.0002101 |
| 16  | rs13335265 | 84530311 | C  | ADD  | 6973  | 0.7824   | 0.048    | 0.7121  | 0.8596 | -5.112    | 3.18E-07  |
| 16  | 84530325   | 84530325 | 0  | ADD  | 7324  | NA       | NA       | NA      | NA     | NA        | NA        |
| 16  | 84530431   | 84530431 | G  | ADD  | 7373  | 7.39E-10 | 1.62E+04 | 0       | inf    | -0.001299 | 0.999     |
| 16  | rs62051023 | 84530439 | T  | ADD  | 7345  | 1.296    | 0.1663   | 0.9354  | 1.795  | 1.558     | 0.1191    |
| 16  | 84530468   | 84530468 | T  | ADD  | 7344  | 0.5823   | 1.299    | 0.04563 | 7.43   | -0.4163   | 0.6772    |
| 16  | rs8062669  | 84530493 | T  | ADD  | 7369  | 1.083    | 0.08938  | 0.909   | 1.29   | 0.8925    | 0.3721    |
| 16  | rs12711490 | 84530529 | C  | ADD  | 7374  | 0.7996   | 0.04626  | 0.7303  | 0.8755 | -4.835    | 1.33E-06  |
| 16  | 84530554   | 84530554 | C  | ADD  | 7376  | 1.761    | 0.7383   | 0.4144  | 7.486  | 0.7667    | 0.4433    |
| 16  | rs12598434 | 84530560 | T  | ADD  | 7330  | 0.8666   | 0.04169  | 0.7986  | 0.9404 | -3.434    | 0.0005941 |
| 16  | rs11641153 | 84530641 | G  | ADD  | 7340  | 0.7901   | 0.0465   | 0.7213  | 0.8655 | -5.067    | 4.05E-07  |
| 16  | rs11641155 | 84530653 | G  | ADD  | 7339  | 0.7898   | 0.0465   | 0.721   | 0.8651 | -5.076    | 3.86E-07  |
| 16  | rs7205434  | 84530696 | G  | ADD  | 7339  | 0.7898   | 0.0465   | 0.721   | 0.8651 | -5.076    | 3.86E-07  |
| 16  | rs8050476  | 84530705 | G  | ADD  | 7382  | 1.041    | 0.08729  | 0.8777  | 1.236  | 0.4652    | 0.6418    |
| 16  | rs4843868  | 84530902 | T  | ADD  | 7328  | 0.788    | 0.04655  | 0.7193  | 0.8633 | -5.117    | 3.10E-07  |
| 16  | 84530967   | 84530967 | T  | ADD  | 7359  | 1.051    | 0.1074   | 0.8516  | 1.297  | 0.4638    | 0.6428    |
| 16  | rs1879213  | 84530977 | T  | ADD  | 7347  | 1.05     | 0.0595   | 0.9341  | 1.179  | 0.8134    | 0.416     |
| 16  | rs56250418 | 84530999 | T  | ADD  | 7104  | 0.8906   | 0.07205  | 0.7733  | 1.026  | -1.608    | 0.1079    |
| 16  | rs305065   | 84531367 | G  | ADD  | 7325  | 1.123    | 0.04082  | 1.036   | 1.216  | 2.833     | 0.00461   |
| 16  | 84531390   | 84531390 | C  | ADD  | 7285  | 1.038    | 0.271    | 0.6104  | 1.766  | 0.1383    | 0.89      |
| 16  | rs305064   | 84531643 | T  | ADD  | 7317  | 1.133    | 0.04096  | 1.046   | 1.228  | 3.054     | 0.002256  |
| 16  | rs9927123  | 84531682 | G  | ADD  | 7343  | 0.8729   | 0.04042  | 0.8064  | 0.9449 | -3.362    | 0.0007727 |
| 16  | rs16940087 | 84531752 | T  | ADD  | 7379  | 0.7001   | 0.7662   | 0.156   | 3.143  | -0.4653   | 0.6417    |
| 16  | rs16940088 | 84531870 | T  | ADD  | 7339  | 1.054    | 0.05959  | 0.9374  | 1.184  | 0.8757    | 0.3812    |
| 16  | rs13330932 | 84532008 | T  | ADD  | 7290  | 0.8288   | 0.04227  | 0.7629  | 0.9004 | -4.442    | 8.91E-06  |
| 16  | 84532040   | 84532040 | T  | ADD  | 7345  | 0.5819   | 1.299    | 0.04561 | 7.425  | -0.4167   | 0.6769    |
| 16  | rs305063   | 84532158 | T  | ADD  | 7045  | 1.019    | 0.08769  | 0.8577  | 1.21   | 0.2099    | 0.8338    |
| 16  | 84532198   | 84532198 | 0  | ADD  | 7368  | NA       | NA       | NA      | NA     | NA        | NA        |
| 16  | rs56834409 | 84532277 | G  | ADD  | 7340  | 1.055    | 0.0596   | 0.9384  | 1.185  | 0.8924    | 0.3722    |
| 16  | 84532342   | 84532342 | C  | ADD  | 4985  | 0.9808   | 0.08287  | 0.8337  | 1.154  | -0.2343   | 0.8147    |
| 16  | rs4843322  | 84532386 | G  | ADD  | 7347  | 0.8519   | 0.04158  | 0.7853  | 0.9243 | -3.854    | 0.0001161 |
| 16  | rs4843323  | 84532462 | T  | ADD  | 7321  | 0.7877   | 0.04667  | 0.7188  | 0.8631 | -5.114    | 3.15E-07  |
| 16  | rs12596291 | 84532538 | C  | ADD  | 7337  | 1.052    | 0.05963  | 0.9359  | 1.182  | 0.8491    | 0.3959    |
| 16  | rs12596295 | 84532576 | A  | ADD  | 7336  | 1.001    | 0.06383  | 0.8834  | 1.135  | 0.01738   | 0.9861    |
| 16  | rs4843869  | 84532642 | A  | ADD  | 7332  | 0.7885   | 0.04661  | 0.7196  | 0.8639 | -5.099    | 3.42E-07  |



| CHR | SNP        | BP       | A1 | TEST | NMISS | OR       | SE       | L95     | U95    | STAT       | P        |
|-----|------------|----------|----|------|-------|----------|----------|---------|--------|------------|----------|
| 16  | 84532733   | 84532733 | 0  | ADD  | 7223  | NA       | NA       | NA      | NA     | NA         | NA       |
| 16  | 84532800   | 84532800 | G  | ADD  | 7101  | 1.334    | 0.4513   | 0.5507  | 3.231  | 0.6383     | 0.5233   |
| 16  | 84532862   | 84532862 | 0  | ADD  | 7087  | NA       | NA       | NA      | NA     | NA         | NA       |
| 16  | rs305062   | 84533003 | G  | ADD  | 7380  | 1.331    | 0.1753   | 0.9441  | 1.877  | 1.632      | 0.1026   |
| 16  | rs305061   | 84533160 | C  | ADD  | 7359  | 1.116    | 0.04058  | 1.031   | 1.209  | 2.716      | 0.006614 |
| 16  | 84533416   | 84533416 | C  | ADD  | 4295  | 1.069    | 0.09967  | 0.8796  | 1.3    | 0.6725     | 0.5012   |
| 16  | rs305060   | 84533417 | C  | ADD  | 7343  | 1.09     | 0.04607  | 0.9962  | 1.193  | 1.877      | 0.06047  |
| 16  | rs16940099 | 84533441 | C  | ADD  | 7361  | 1.06     | 0.08956  | 0.8891  | 1.263  | 0.6481     | 0.5169   |
| 16  | rs16940100 | 84533460 | T  | ADD  | 7366  | 1.067    | 0.08925  | 0.8956  | 1.271  | 0.7245     | 0.4687   |
| 16  | 84533481   | 84533481 | 0  | ADD  | 7382  | NA       | NA       | NA      | NA     | NA         | NA       |
| 16  | rs305059   | 84533519 | A  | ADD  | 7149  | 1.078    | 0.04642  | 0.9845  | 1.181  | 1.623      | 0.1046   |
| 16  | 84533526   | 84533526 | 0  | ADD  | 7377  | NA       | NA       | NA      | NA     | NA         | NA       |
| 16  | 84533672   | 84533672 | T  | ADD  | 7366  | 1.067    | 0.08925  | 0.8956  | 1.271  | 0.7245     | 0.4687   |
| 16  | 84533804   | 84533804 | C  | ADD  | 7365  | 1.067    | 0.08925  | 0.8955  | 1.271  | 0.7234     | 0.4695   |
| 16  | 84533839   | 84533839 | 0  | ADD  | 7238  | NA       | NA       | NA      | NA     | NA         | NA       |
| 16  | 84533939   | 84533939 | C  | ADD  | 7214  | 1.07     | 0.08959  | 0.8973  | 1.275  | 0.7509     | 0.4527   |
| 16  | 84534522   | 84534522 | G  | ADD  | 7300  | 1.214    | 0.2242   | 0.7821  | 1.884  | 0.8638     | 0.3877   |
| 16  | 84534632   | 84534632 | C  | ADD  | 7379  | 1.147    | 0.7947   | 0.2416  | 5.445  | 0.1725     | 0.863    |
| 16  | 84534741   | 84534741 | T  | ADD  | 7253  | 1.279    | 0.521    | 0.4606  | 3.55   | 0.4721     | 0.6369   |
| 16  | rs7202472  | 84535003 | T  | ADD  | 7335  | 0.7829   | 0.04759  | 0.7132  | 0.8594 | -5.144     | 2.69E-07 |
| 16  | 84535111   | 84535111 | T  | ADD  | 7245  | 0.8391   | 0.2048   | 0.5617  | 1.254  | -0.8563    | 0.3918   |
| 16  | 84535271   | 84535271 | A  | ADD  | 7351  | 0.3135   | 0.8403   | 0.0604  | 1.627  | -1.38      | 0.1675   |
| 16  | 84535272   | 84535272 | A  | ADD  | 7367  | 0.1967   | 1.124    | 0.02172 | 1.781  | -1.446     | 0.148    |
| 16  | rs305097   | 84535412 | A  | ADD  | 7280  | 1.162    | 0.1042   | 0.9475  | 1.426  | 1.443      | 0.1491   |
| 16  | rs62051024 | 84535456 | C  | ADD  | 7090  | 0.8891   | 0.07147  | 0.7728  | 1.023  | -1.645     | 0.09989  |
| 16  | rs305095   | 84535500 | T  | ADD  | 7350  | 1.112    | 0.102    | 0.9106  | 1.358  | 1.041      | 0.2979   |
| 16  | rs305094   | 84535606 | C  | ADD  | 7326  | 1.117    | 0.04069  | 1.032   | 1.21   | 2.724      | 0.006443 |
| 16  | rs72807020 | 84535618 | G  | ADD  | 7323  | 1.013    | 0.05756  | 0.9047  | 1.134  | 0.2193     | 0.8264   |
| 16  | rs16940101 | 84535626 | G  | ADD  | 7381  | 1.047    | 0.08762  | 0.8817  | 1.243  | 0.5228     | 0.6011   |
| 16  | rs16940103 | 84535710 | T  | ADD  | 7322  | 1.004    | 0.05761  | 0.8967  | 1.124  | 0.06722    | 0.9464   |
| 16  | rs16940104 | 84535711 | T  | ADD  | 7365  | 1.048    | 0.08918  | 0.8796  | 1.248  | 0.5218     | 0.6018   |
| 16  | rs7186094  | 84535988 | T  | ADD  | 7373  | 1.07     | 0.05354  | 0.963   | 1.188  | 1.255      | 0.2095   |
| 16  | rs7190319  | 84536046 | G  | ADD  | 7379  | 1.073    | 0.05357  | 0.9664  | 1.192  | 1.322      | 0.1861   |
| 16  | rs305093   | 84536086 | T  | ADD  | 7350  | 1.118    | 0.04072  | 1.032   | 1.21   | 2.73       | 0.00633  |
| 16  | 84536244   | 84536244 | 0  | ADD  | 7374  | NA       | NA       | NA      | NA     | NA         | NA       |
| 16  | rs11639990 | 84536305 | G  | ADD  | 7380  | 1.073    | 0.05349  | 0.9664  | 1.192  | 1.322      | 0.1862   |
| 16  | 84536585   | 84536585 | 0  | ADD  | 7291  | NA       | NA       | NA      | NA     | NA         | NA       |
| 16  | 84536608   | 84536608 | C  | ADD  | 7349  | 2.615    | 0.5045   | 0.9727  | 7.03   | 1.905      | 0.05676  |
| 16  | rs305092   | 84536618 | A  | ADD  | 7321  | 1.133    | 0.0408   | 1.046   | 1.228  | 3.068      | 0.002158 |
| 16  | rs305091   | 84536744 | A  | ADD  | 7351  | 1.127    | 0.04033  | 1.041   | 1.219  | 2.957      | 0.00311  |
| 16  | 84536846   | 84536846 | C  | ADD  | 3157  | 0.9069   | 0.06732  | 0.7948  | 1.035  | -1.452     | 0.1465   |
| 16  | rs305090   | 84536847 | T  | ADD  | 7331  | 1.132    | 0.04042  | 1.046   | 1.225  | 3.07       | 0.002143 |
| 16  | 84536862   | 84536862 | A  | ADD  | 7378  | 2.025    | 0.5625   | 0.6724  | 6.099  | 1.254      | 0.2097   |
| 16  | 84537033   | 84537033 | T  | ADD  | 7320  | 4.22E-10 | 2.44E+04 | 0       | inf    | -0.0008854 | 0.9993   |
| 16  | 84537070   | 84537070 | T  | ADD  | 7353  | 0.3635   | 0.852    | 0.06845 | 1.931  | -1.188     | 0.2349   |
| 16  | 84537135   | 84537135 | 0  | ADD  | 7338  | NA       | NA       | NA      | NA     | NA         | NA       |
| 16  | 84537212   | 84537212 | A  | ADD  | 7369  | 7.38E-10 | 1.62E+04 | 0       | inf    | -0.001299  | 0.999    |
| 16  | 84537309   | 84537309 | 0  | ADD  | 7373  | NA       | NA       | NA      | NA     | NA         | NA       |
| 16  | rs11641591 | 84537652 | T  | ADD  | 7329  | 1.245    | 0.1776   | 0.879   | 1.764  | 1.234      | 0.2172   |
| 16  | rs62051025 | 84537707 | T  | ADD  | 6941  | 0.8744   | 0.08089  | 0.7462  | 1.025  | -1.659     | 0.09702  |
| 16  | rs965773   | 84537847 | A  | ADD  | 7328  | 0.8293   | 0.04469  | 0.7597  | 0.9052 | -4.188     | 2.81E-05 |
| 16  | rs16940113 | 84537948 | T  | ADD  | 7379  | 1.064    | 0.8684   | 0.1941  | 5.838  | 0.07184    | 0.9427   |
| 16  | 84538025   | 84538025 | G  | ADD  | 7344  | 1.11     | 0.09558  | 0.9204  | 1.339  | 1.093      | 0.2746   |

| CHR | SNP        | BP       | A1 | TEST | NMISS | OR       | SE       | L95     | U95    | STAT       | P        |
|-----|------------|----------|----|------|-------|----------|----------|---------|--------|------------|----------|
| 16  | rs731708   | 84538035 | A  | ADD  | 7293  | 0.7841   | 0.04741  | 0.7145  | 0.8604 | -5.131     | 2.88E-07 |
| 16  | 84538040   | 84538040 | T  | ADD  | 7080  | 0.7116   | 0.2579   | 0.4292  | 1.18   | -1.319     | 0.1871   |
| 16  | rs731709   | 84538088 | C  | ADD  | 7348  | 1.056    | 0.08999  | 0.8853  | 1.26   | 0.6065     | 0.5442   |
| 16  | 84538106   | 84538106 | T  | ADD  | 7067  | 1.195    | 0.2493   | 0.7329  | 1.948  | 0.7135     | 0.4755   |
| 16  | 84538380   | 84538380 | O  | ADD  | 7357  | NA       | NA       | NA      | NA     | NA         | NA       |
| 16  | rs731707   | 84538469 | C  | ADD  | 7329  | 0.8335   | 0.04445  | 0.764   | 0.9094 | -4.098     | 4.18E-05 |
| 16  | 84538530   | 84538530 | A  | ADD  | 7353  | 0.9128   | 1.078    | 0.1103  | 7.556  | -0.08456   | 0.9326   |
| 16  | rs305089   | 84538531 | T  | ADD  | 7355  | 1.111    | 0.04075  | 1.026   | 1.203  | 2.581      | 0.009842 |
| 16  | 84538676   | 84538676 | O  | ADD  | 7351  | NA       | NA       | NA      | NA     | NA         | NA       |
| 16  | 84538740   | 84538740 | T  | ADD  | 7270  | 0.5358   | 1.01     | 0.074   | 3.879  | -0.6178    | 0.5367   |
| 16  | 84538942   | 84538942 | G  | ADD  | 7073  | 0.9474   | 0.1976   | 0.6431  | 1.396  | -0.2734    | 0.7845   |
| 16  | 84538944   | 84538944 | T  | ADD  | 7365  | 4.13E-10 | 1.72E+04 | 0       | inf    | -0.001254  | 0.999    |
| 16  | rs11643168 | 84538983 | T  | ADD  | 7322  | 1.036    | 0.0693   | 0.9041  | 1.186  | 0.5044     | 0.614    |
| 16  | rs305088   | 84539102 | T  | ADD  | 7311  | 1.094    | 0.03863  | 1.014   | 1.18   | 2.328      | 0.0199   |
| 16  | 84539195   | 84539195 | C  | ADD  | 7382  | 1.23E+09 | 2.44E+04 | 0       | inf    | 0.0008586  | 0.9993   |
| 16  | 84539211   | 84539211 | C  | ADD  | 7366  | 1.577    | 1.225    | 0.1428  | 17.41  | 0.3716     | 0.7102   |
| 16  | 84539306   | 84539306 | A  | ADD  | 6358  | 1.13     | 0.08819  | 0.9508  | 1.344  | 1.388      | 0.165    |
| 16  | rs305087   | 84539747 | C  | ADD  | 6968  | 0.8356   | 0.05562  | 0.7493  | 0.9318 | -3.229     | 0.001241 |
| 16  | rs7198504  | 84539802 | C  | ADD  | 6832  | 0.9262   | 0.0418   | 0.8533  | 1.005  | -1.835     | 0.06648  |
| 16  | rs9935237  | 84540017 | G  | ADD  | 6240  | 0.7201   | 0.3444   | 0.3666  | 1.415  | -0.9531    | 0.3405   |
| 16  | rs305086   | 84540022 | A  | ADD  | 7378  | 1.088    | 0.04773  | 0.9906  | 1.194  | 1.761      | 0.07823  |
| 16  | rs8053060  | 84540490 | A  | ADD  | 5065  | 0.9996   | 0.05438  | 0.8986  | 1.112  | -0.006479  | 0.9948   |
| 16  | 84540536   | 84540536 | O  | ADD  | 7384  | NA       | NA       | NA      | NA     | NA         | NA       |
| 16  | 84540547   | 84540547 | O  | ADD  | 7384  | NA       | NA       | NA      | NA     | NA         | NA       |
| 16  | rs6540234  | 84540557 | T  | ADD  | 7328  | 1.041    | 0.03895  | 0.9649  | 1.124  | 1.043      | 0.2971   |
| 16  | rs8049187  | 84540779 | T  | ADD  | 5085  | 1.061    | 0.04423  | 0.9729  | 1.157  | 1.338      | 0.1807   |
| 16  | rs8062690  | 84540827 | G  | ADD  | 5014  | 0.8667   | 0.05117  | 0.784   | 0.9581 | -2.796     | 0.005172 |
| 16  | rs8053604  | 84540842 | T  | ADD  | 4311  | 1.06     | 0.04795  | 0.9649  | 1.164  | 1.215      | 0.2243   |
| 16  | 84541049   | 84541049 | G  | ADD  | 7371  | 3.86E-10 | 2.44E+04 | 0       | inf    | -0.0008891 | 0.9993   |
| 16  | 84541077   | 84541077 | O  | ADD  | 7055  | NA       | NA       | NA      | NA     | NA         | NA       |
| 16  | 84541142   | 84541142 | G  | ADD  | 7381  | 3.87E-10 | 2.44E+04 | 0       | inf    | -0.000889  | 0.9993   |
| 16  | 84541177   | 84541177 | C  | ADD  | 4188  | 0.905    | 0.04627  | 0.8265  | 0.9909 | -2.158     | 0.03096  |
| 16  | 84541179   | 84541179 | T  | ADD  | 4187  | 0.9061   | 0.04628  | 0.8275  | 0.9921 | -2.131     | 0.03309  |
| 16  | 84541180   | 84541180 | C  | ADD  | 4187  | 0.9061   | 0.04628  | 0.8275  | 0.9921 | -2.131     | 0.03309  |
| 16  | rs2361768  | 84541181 | G  | ADD  | 4187  | 0.9061   | 0.04628  | 0.8275  | 0.9921 | -2.131     | 0.03309  |
| 16  | 84541385   | 84541385 | A  | ADD  | 7372  | 3.87E-10 | 2.44E+04 | 0       | inf    | -0.0008891 | 0.9993   |
| 16  | 84541450   | 84541450 | G  | ADD  | 7333  | 0.7452   | 1.42     | 0.04609 | 12.05  | -0.2071    | 0.8359   |
| 16  | rs55739703 | 84541492 | G  | ADD  | 7319  | 0.9557   | 0.1158   | 0.7617  | 1.199  | -0.3913    | 0.6956   |
| 16  | rs870614   | 84541516 | A  | ADD  | 5842  | 0.974    | 0.05559  | 0.8734  | 1.086  | -0.4742    | 0.6354   |
| 16  | rs8047292  | 84541556 | T  | ADD  | 7380  | 0.6586   | 0.6359   | 0.1894  | 2.291  | -0.6567    | 0.5114   |
| 16  | rs908988   | 84542101 | G  | ADD  | 7353  | 1.032    | 0.03818  | 0.958   | 1.113  | 0.8354     | 0.4035   |
| 16  | rs8060078  | 84542153 | T  | ADD  | 7362  | 1.88     | 0.5899   | 0.5916  | 5.973  | 1.07       | 0.2846   |
| 16  | rs908987   | 84542390 | T  | ADD  | 6955  | 1.031    | 0.03924  | 0.9544  | 1.113  | 0.7696     | 0.4416   |
| 16  | rs908986   | 84542429 | G  | ADD  | 7356  | 1.048    | 0.03869  | 0.9712  | 1.13   | 1.204      | 0.2285   |
| 16  | rs908985   | 84542503 | T  | ADD  | 7360  | 1.046    | 0.03868  | 0.9697  | 1.129  | 1.166      | 0.2438   |
| 16  | 84542511   | 84542511 | A  | ADD  | 7358  | 0.6902   | 0.6196   | 0.2049  | 2.325  | -0.5984    | 0.5496   |
| 16  | rs908984   | 84542530 | T  | ADD  | 7378  | 1.048    | 0.03867  | 0.9716  | 1.131  | 1.216      | 0.224    |
| 16  | rs57670691 | 84542583 | A  | ADD  | 7332  | 0.9108   | 0.1108   | 0.733   | 1.132  | -0.8431    | 0.3992   |
| 16  | rs57396687 | 84542701 | A  | ADD  | 7338  | 0.9359   | 0.1119   | 0.7516  | 1.165  | -0.5921    | 0.5538   |
| 16  | rs1915034  | 84542858 | A  | ADD  | 7368  | 1.056    | 0.03971  | 0.9773  | 1.142  | 1.382      | 0.167    |
| 16  | rs4240807  | 84542862 | A  | ADD  | 7354  | 1.059    | 0.03973  | 0.9793  | 1.144  | 1.434      | 0.1514   |
| 16  | rs1915033  | 84542932 | A  | ADD  | 7337  | 1.048    | 0.03871  | 0.9716  | 1.131  | 1.215      | 0.2242   |
| 16  | 84542936   | 84542936 | T  | ADD  | 7380  | 3.87E-10 | 2.44E+04 | 0       | inf    | -0.000889  | 0.9993   |

| CHR | SNP        | BP       | A1 | TEST | NMISS | OR       | SE       | L95    | U95    | STAT      | P         |
|-----|------------|----------|----|------|-------|----------|----------|--------|--------|-----------|-----------|
| 16  | 84542966   | 84542966 | C  | ADD  | 7380  | 3.87E-10 | 2.44E+04 | 0      | inf    | -0.000889 | 0.9993    |
| 16  | rs4843871  | 84543036 | G  | ADD  | 7332  | 1.038    | 0.03831  | 0.9632 | 1.119  | 0.9807    | 0.3267    |
| 16  | rs4843872  | 84543172 | A  | ADD  | 7363  | 1.045    | 0.03864  | 0.9684 | 1.127  | 1.128     | 0.2592    |
| 16  | 84543226   | 84543226 | A  | ADD  | 7383  | 7.95E+08 | 2.44E+04 | 0      | inf    | 0.0008406 | 0.9993    |
| 16  | rs10863201 | 84543272 | C  | ADD  | 7119  | 1.038    | 0.03881  | 0.9622 | 1.12   | 0.9661    | 0.334     |
| 16  | rs58073431 | 84543416 | C  | ADD  | 7339  | 0.9267   | 0.112    | 0.744  | 1.154  | -0.6795   | 0.4968    |
| 16  | rs59821663 | 84543420 | A  | ADD  | 7339  | 0.9267   | 0.112    | 0.744  | 1.154  | -0.6795   | 0.4968    |
| 16  | 84543445   | 84543445 | O  | ADD  | 7377  | NA       | NA       | NA     | NA     | NA        | NA        |
| 16  | 84543446   | 84543446 | O  | ADD  | 7377  | NA       | NA       | NA     | NA     | NA        | NA        |
| 16  | rs59403904 | 84543458 | T  | ADD  | 7250  | 1.074    | 0.1343   | 0.8255 | 1.397  | 0.5321    | 0.5947    |
| 16  | 84543506   | 84543506 | O  | ADD  | 7384  | NA       | NA       | NA     | NA     | NA        | NA        |
| 16  | 84543518   | 84543518 | O  | ADD  | 7384  | NA       | NA       | NA     | NA     | NA        | NA        |
| 16  | rs58189590 | 84543560 | A  | ADD  | 7332  | 0.9201   | 0.1118   | 0.739  | 1.146  | -0.7444   | 0.4566    |
| 16  | rs57426547 | 84543596 | T  | ADD  | 7332  | 0.9201   | 0.1118   | 0.739  | 1.146  | -0.7444   | 0.4566    |
| 16  | 84543660   | 84543660 | O  | ADD  | 7384  | NA       | NA       | NA     | NA     | NA        | NA        |
| 16  | rs73268906 | 84544188 | G  | ADD  | 7333  | 0.9268   | 0.112    | 0.7441 | 1.154  | -0.6789   | 0.4972    |
| 16  | rs73268908 | 84544290 | A  | ADD  | 7342  | 0.9328   | 0.1122   | 0.7487 | 1.162  | -0.6197   | 0.5355    |
| 16  | rs73268912 | 84544401 | A  | ADD  | 7337  | 0.9413   | 0.1119   | 0.7559 | 1.172  | -0.54     | 0.5892    |
| 16  | 84544635   | 84544635 | T  | ADD  | 7338  | 0.5952   | 0.6644   | 0.1618 | 2.189  | -0.7809   | 0.4348    |
| 16  | 84544641   | 84544641 | O  | ADD  | 7382  | NA       | NA       | NA     | NA     | NA        | NA        |
| 16  | 84544743   | 84544743 | G  | ADD  | 7380  | 3.87E-10 | 2.44E+04 | 0      | inf    | -0.000889 | 0.9993    |
| 16  | rs59120392 | 84544797 | T  | ADD  | 7345  | 0.9369   | 0.112    | 0.7522 | 1.167  | -0.5816   | 0.5608    |
| 16  | rs57278440 | 84544999 | C  | ADD  | 7346  | 0.9367   | 0.112    | 0.7521 | 1.167  | -0.5832   | 0.5598    |
| 16  | rs10863202 | 84545499 | A  | ADD  | 7257  | 1.045    | 0.03847  | 0.969  | 1.127  | 1.14      | 0.2542    |
| 16  | rs8060960  | 84545861 | T  | ADD  | 7329  | 1.03     | 0.03878  | 0.9548 | 1.112  | 0.7672    | 0.443     |
| 16  | rs8048151  | 84546099 | C  | ADD  | 7315  | 1.048    | 0.03933  | 0.9699 | 1.132  | 1.182     | 0.2371    |
| 16  | 84546166   | 84546166 | A  | ADD  | 7342  | 0.5886   | 0.8885   | 0.1032 | 3.358  | -0.5965   | 0.5508    |
| 16  | 84546175   | 84546175 | A  | ADD  | 7380  | 3.87E-10 | 2.44E+04 | 0      | inf    | -0.000889 | 0.9993    |
| 16  | rs73268923 | 84546268 | T  | ADD  | 7344  | 0.9464   | 0.1123   | 0.7594 | 1.18   | -0.4902   | 0.624     |
| 16  | 84546359   | 84546359 | A  | ADD  | 7338  | 0.9344   | 0.112    | 0.7503 | 1.164  | -0.6058   | 0.5446    |
| 16  | rs6540235  | 84546396 | T  | ADD  | 7337  | 1.045    | 0.03835  | 0.9694 | 1.127  | 1.15      | 0.25      |
| 16  | 84546553   | 84546553 | O  | ADD  | 7357  | NA       | NA       | NA     | NA     | NA        | NA        |
| 16  | rs7186247  | 84546570 | T  | ADD  | 7329  | 1.042    | 0.03835  | 0.9668 | 1.124  | 1.079     | 0.2807    |
| 16  | 84546654   | 84546654 | G  | ADD  | 7289  | 0.9143   | 0.4607   | 0.3706 | 2.255  | -0.1945   | 0.8458    |
| 16  | rs7199472  | 84546685 | G  | ADD  | 7373  | 1.034    | 0.03824  | 0.9598 | 1.115  | 0.8859    | 0.3756    |
| 16  | rs11640143 | 84546965 | C  | ADD  | 7354  | 0.8339   | 0.07328  | 0.7223 | 0.9627 | -2.479    | 0.01318   |
| 16  | 84547130   | 84547130 | T  | ADD  | 7312  | 1.14     | 1.478    | 0.0629 | 20.65  | 0.08836   | 0.9296    |
| 16  | 84547216   | 84547216 | T  | ADD  | 7384  | 1.673    | 1.157    | 0.1734 | 16.14  | 0.4449    | 0.6564    |
| 16  | rs4843873  | 84547276 | A  | ADD  | 7354  | 1.054    | 0.03894  | 0.9762 | 1.137  | 1.34      | 0.1801    |
| 16  | 84547352   | 84547352 | A  | ADD  | 7289  | 1.515    | 0.3814   | 0.7174 | 3.199  | 1.089     | 0.2761    |
| 16  | rs4843874  | 84547399 | C  | ADD  | 7360  | 1.044    | 0.03888  | 0.9673 | 1.127  | 1.106     | 0.2689    |
| 16  | rs4843875  | 84547443 | T  | ADD  | 5785  | 1.012    | 0.05698  | 0.9053 | 1.132  | 0.2146    | 0.8301    |
| 16  | 84547570   | 84547570 | O  | ADD  | 7384  | NA       | NA       | NA     | NA     | NA        | NA        |
| 16  | 84547601   | 84547601 | C  | ADD  | 7343  | 0.5889   | 0.8885   | 0.1032 | 3.36   | -0.5959   | 0.5513    |
| 16  | rs73268928 | 84547653 | G  | ADD  | 7325  | 0.9632   | 0.1143   | 0.7699 | 1.205  | -0.3277   | 0.7432    |
| 16  | 84547657   | 84547657 | O  | ADD  | 7354  | NA       | NA       | NA     | NA     | NA        | NA        |
| 16  | rs11117426 | 84547768 | C  | ADD  | 7292  | 0.8403   | 0.04616  | 0.7676 | 0.9199 | -3.769    | 0.0001636 |
| 16  | 84547926   | 84547926 | C  | ADD  | 7382  | 3.87E-10 | 2.44E+04 | 0      | inf    | -0.000889 | 0.9993    |
| 16  | rs11117427 | 84548058 | A  | ADD  | 7253  | 0.8414   | 0.0467   | 0.7678 | 0.922  | -3.698    | 0.000217  |
| 16  | rs925992   | 84548081 | T  | ADD  | 7152  | 1.045    | 0.03953  | 0.9667 | 1.129  | 1.104     | 0.2695    |
| 16  | 84548374   | 84548374 | T  | ADD  | 7383  | 3.87E-10 | 2.44E+04 | 0      | inf    | -0.000889 | 0.9993    |
| 16  | 84548382   | 84548382 | C  | ADD  | 7308  | 0.3806   | 0.7189   | 0.093  | 1.557  | -1.344    | 0.179     |
| 16  | rs8057009  | 84548424 | G  | ADD  | 7371  | 1.022    | 0.03995  | 0.9448 | 1.105  | 0.5377    | 0.5908    |

| CHR | SNP        | BP       | A1 | TEST | NMISS | OR       | SE       | L95     | U95    | STAT       | P         |
|-----|------------|----------|----|------|-------|----------|----------|---------|--------|------------|-----------|
| 16  | rs6540236  | 84548591 | A  | ADD  | 7276  | 1.053    | 0.03925  | 0.9747  | 1.137  | 1.308      | 0.1907    |
| 16  | rs12445476 | 84548770 | G  | ADD  | 7380  | 0.8362   | 0.04631  | 0.7636  | 0.9156 | -3.864     | 0.0001115 |
| 16  | 84548866   | 84548866 | G  | ADD  | 7377  | 9.375    | 1.095    | 1.097   | 80.11  | 2.045      | 0.04089   |
| 16  | 84548901   | 84548901 | T  | ADD  | 5827  | 0.9966   | 0.1084   | 0.8058  | 1.232  | -0.03155   | 0.9748    |
| 16  | rs7185590  | 84549154 | A  | ADD  | 7337  | 1.376    | 0.3336   | 0.7158  | 2.647  | 0.9576     | 0.3383    |
| 16  | rs11642873 | 84549206 | C  | ADD  | 7319  | 0.839    | 0.04706  | 0.7651  | 0.9201 | -3.73      | 0.0001916 |
| 16  | 84549320   | 84549320 | C  | ADD  | 6323  | 0.6861   | 0.2334   | 0.4342  | 1.084  | -1.614     | 0.1065    |
| 16  | rs6540238  | 84549328 | A  | ADD  | 7239  | 1.051    | 0.03925  | 0.9728  | 1.135  | 1.256      | 0.2091    |
| 16  | rs12444486 | 84550150 | C  | ADD  | 7281  | 0.9284   | 0.03537  | 0.8663  | 0.9951 | -2.1       | 0.03576   |
| 16  | rs4843876  | 84550233 | T  | ADD  | 7375  | 1.043    | 0.03845  | 0.9674  | 1.125  | 1.097      | 0.2726    |
| 16  | rs11117428 | 84550330 | C  | ADD  | 7091  | 1.048    | 0.04222  | 0.9646  | 1.138  | 1.107      | 0.2683    |
| 16  | rs2361764  | 84550459 | G  | ADD  | 7248  | 1.045    | 0.0387   | 0.9687  | 1.127  | 1.138      | 0.2552    |
| 16  | 84550594   | 84550594 | O  | ADD  | 7384  | NA       | NA       | NA      | NA     | NA         | NA        |
| 16  | rs2361763  | 84550635 | T  | ADD  | 7296  | 0.9348   | 0.03531  | 0.8723  | 1.002  | -1.909     | 0.05626   |
| 16  | rs2885364  | 84550691 | A  | ADD  | 7277  | 1.044    | 0.03865  | 0.9678  | 1.126  | 1.112      | 0.266     |
| 16  | rs4843877  | 84550733 | C  | ADD  | 7260  | 1.032    | 0.03869  | 0.9564  | 1.113  | 0.8068     | 0.4198    |
| 16  | rs35929052 | 84551985 | T  | ADD  | 7077  | 0.8292   | 0.05918  | 0.7384  | 0.9312 | -3.165     | 0.001549  |
| 16  | rs908983   | 84552021 | C  | ADD  | 7373  | 1.053    | 0.038    | 0.9772  | 1.134  | 1.353      | 0.176     |
| 16  | rs883332   | 84552225 | C  | ADD  | 7381  | 1.054    | 0.2201   | 0.6845  | 1.622  | 0.2379     | 0.812     |
| 16  | rs34347181 | 84552262 | O  | ADD  | 7382  | NA       | NA       | NA      | NA     | NA         | NA        |
| 16  | rs2049086  | 84552380 | T  | ADD  | 7105  | 1.041    | 0.03894  | 0.9647  | 1.124  | 1.038      | 0.2994    |
| 16  | rs908982   | 84552384 | A  | ADD  | 7124  | 1.041    | 0.03881  | 0.965   | 1.123  | 1.041      | 0.298     |
| 16  | 84552424   | 84552424 | O  | ADD  | 7384  | NA       | NA       | NA      | NA     | NA         | NA        |
| 16  | rs8044852  | 84552728 | A  | ADD  | 7278  | 1.028    | 0.03784  | 0.9549  | 1.108  | 0.7391     | 0.4598    |
| 16  | rs908981   | 84552926 | T  | ADD  | 7365  | 1.033    | 0.03764  | 0.9593  | 1.112  | 0.8556     | 0.3922    |
| 16  | 84552937   | 84552937 | C  | ADD  | 6916  | 0.7798   | 0.08064  | 0.6658  | 0.9134 | -3.083     | 0.002046  |
| 16  | rs12446139 | 84553085 | G  | ADD  | 7365  | 1.033    | 0.03764  | 0.9593  | 1.112  | 0.8556     | 0.3922    |
| 16  | 84553110   | 84553110 | C  | ADD  | 7308  | 0.9673   | 0.1177   | 0.7681  | 1.218  | -0.2828    | 0.7774    |
| 16  | rs12919427 | 84553160 | A  | ADD  | 7365  | 1.033    | 0.03764  | 0.9593  | 1.112  | 0.8556     | 0.3922    |
| 16  | rs12930405 | 84553163 | C  | ADD  | 7365  | 1.033    | 0.03764  | 0.9593  | 1.112  | 0.8556     | 0.3922    |
| 16  | rs11642456 | 84553581 | T  | ADD  | 7364  | 1.033    | 0.03765  | 0.9596  | 1.112  | 0.8658     | 0.3866    |
| 16  | 84553752   | 84553752 | T  | ADD  | 7338  | 0.746    | 1.42     | 0.04614 | 12.06  | -0.2063    | 0.8365    |
| 16  | rs11649461 | 84553758 | C  | ADD  | 7139  | 1.03     | 0.03777  | 0.9565  | 1.109  | 0.7838     | 0.4332    |
| 16  | 84553776   | 84553776 | T  | ADD  | 7372  | 1.268    | 0.6836   | 0.3321  | 4.842  | 0.3474     | 0.7283    |
| 16  | rs11645398 | 84553796 | G  | ADD  | 7220  | 1.037    | 0.03825  | 0.9619  | 1.118  | 0.9454     | 0.3444    |
| 16  | 84554094   | 84554094 | C  | ADD  | 7379  | 4.18E-10 | 2.44E+04 | 0       | inf    | -0.0008859 | 0.9993    |
| 16  | rs4843324  | 84554392 | O  | ADD  | 7370  | NA       | NA       | NA      | NA     | NA         | NA        |
| 16  | rs11643829 | 84554502 | C  | ADD  | 4795  | 1.042    | 0.04505  | 0.9539  | 1.138  | 0.9131     | 0.3612    |
| 16  | rs35615495 | 84554505 | T  | ADD  | 5308  | 0.9529   | 0.06139  | 0.8449  | 1.075  | -0.7854    | 0.4322    |
| 16  | rs11640586 | 84554529 | C  | ADD  | 4388  | 1.143    | 0.04776  | 1.041   | 1.255  | 2.792      | 0.005231  |
| 16  | rs59015387 | 84554628 | A  | ADD  | 7375  | 3.87E-10 | 2.44E+04 | 0       | inf    | -0.000889  | 0.9993    |
| 16  | 84554776   | 84554776 | T  | ADD  | 7316  | 2.293    | 0.9212   | 0.3769  | 13.95  | 0.9007     | 0.3677    |
| 16  | rs12019053 | 84554782 | G  | ADD  | 5163  | 0.9446   | 0.06153  | 0.8373  | 1.066  | -0.9255    | 0.3547    |
| 16  | 84554944   | 84554944 | C  | ADD  | 4014  | 1.019    | 0.05078  | 0.9227  | 1.126  | 0.3764     | 0.7066    |
| 16  | 84554954   | 84554954 | C  | ADD  | 3600  | 0.9973   | 0.05765  | 0.8908  | 1.117  | -0.04647   | 0.9629    |
| 16  | rs11860050 | 84555097 | A  | ADD  | 5228  | 0.9477   | 0.06198  | 0.8393  | 1.07   | -0.8663    | 0.3863    |
| 16  | 84555268   | 84555268 | O  | ADD  | 7383  | NA       | NA       | NA      | NA     | NA         | NA        |
| 16  | rs12446834 | 84555541 | C  | ADD  | 4674  | 1.02     | 0.04471  | 0.9346  | 1.114  | 0.4482     | 0.654     |
| 16  | rs55906426 | 84555779 | C  | ADD  | 6246  | 1.056    | 0.04518  | 0.9665  | 1.154  | 1.207      | 0.2275    |
| 16  | rs12019051 | 84555863 | G  | ADD  | 4672  | 1.021    | 0.04471  | 0.935   | 1.114  | 0.4562     | 0.6482    |
| 16  | 84555917   | 84555917 | O  | ADD  | 7369  | NA       | NA       | NA      | NA     | NA         | NA        |
| 16  | 84556011   | 84556011 | O  | ADD  | 7374  | NA       | NA       | NA      | NA     | NA         | NA        |
| 16  | rs16940146 | 84556487 | G  | ADD  | 7376  | 8.573    | 1.107    | 0.9793  | 75.06  | 1.941      | 0.05225   |

| CHR | SNP        | BP       | A1 | TEST | NMISS | OR       | SE       | L95     | U95    | STAT      | P        |
|-----|------------|----------|----|------|-------|----------|----------|---------|--------|-----------|----------|
| 16  | 84556512   | 84556512 | 0  | ADD  | 7383  | NA       | NA       | NA      | NA     | NA        | NA       |
| 16  | rs34445961 | 84556804 | G  | ADD  | 4033  | 1.073    | 0.04964  | 0.9735  | 1.183  | 1.419     | 0.156    |
| 16  | rs34256051 | 84556806 | C  | ADD  | 4057  | 1.055    | 0.04932  | 0.9582  | 1.163  | 1.093     | 0.2742   |
| 16  | 84556855   | 84556855 | T  | ADD  | 7371  | 8.38E-10 | 1.65E+04 | 0       | inf    | -0.001269 | 0.999    |
| 16  | rs62051883 | 84556897 | A  | ADD  | 7188  | 1.09     | 0.3421   | 0.5573  | 2.13   | 0.2506    | 0.8021   |
| 16  | rs59276136 | 84556910 | A  | ADD  | 4587  | 1.018    | 0.04517  | 0.9317  | 1.112  | 0.394     | 0.6936   |
| 16  | 84557150   | 84557150 | 0  | ADD  | 7376  | NA       | NA       | NA      | NA     | NA        | NA       |
| 16  | rs11863308 | 84557298 | T  | ADD  | 7375  | 3.87E-10 | 2.44E+04 | 0       | inf    | -0.000889 | 0.9993   |
| 16  | 84557332   | 84557332 | C  | ADD  | 7048  | 0.7847   | 0.358    | 0.389   | 1.583  | -0.6774   | 0.4982   |
| 16  | 84557466   | 84557466 | G  | ADD  | 7375  | 5.96E-10 | 1.18E+04 | 0       | inf    | -0.001798 | 0.9986   |
| 16  | rs12598292 | 84557532 | T  | ADD  | 5618  | 0.9116   | 0.2307   | 0.58    | 1.433  | -0.4015   | 0.6881   |
| 16  | rs8053185  | 84557593 | G  | ADD  | 4409  | 1.018    | 0.04642  | 0.9296  | 1.115  | 0.3883    | 0.6978   |
| 16  | rs12446659 | 84557863 | T  | ADD  | 4361  | 1.01     | 0.04674  | 0.9216  | 1.107  | 0.2131    | 0.8312   |
| 16  | rs35867147 | 84557883 | A  | ADD  | 5226  | 0.9455   | 0.06311  | 0.8355  | 1.07   | -0.8874   | 0.3749   |
| 16  | 84557898   | 84557898 | 0  | ADD  | 7360  | NA       | NA       | NA      | NA     | NA        | NA       |
| 16  | rs12446684 | 84557908 | T  | ADD  | 4386  | 1.015    | 0.04655  | 0.9267  | 1.112  | 0.3254    | 0.7449   |
| 16  | rs12444385 | 84557964 | A  | ADD  | 4357  | 1.009    | 0.04676  | 0.9208  | 1.106  | 0.1954    | 0.8451   |
| 16  | 84558091   | 84558091 | C  | ADD  | 4355  | 1.01     | 0.04677  | 0.9215  | 1.107  | 0.2111    | 0.8328   |
| 16  | rs9924246  | 84558107 | C  | ADD  | 4355  | 1.01     | 0.04677  | 0.9215  | 1.107  | 0.2111    | 0.8328   |
| 16  | 84558180   | 84558180 | C  | ADD  | 3185  | 0.9974   | 0.05533  | 0.8949  | 1.112  | -0.04631  | 0.9631   |
| 16  | 84558188   | 84558188 | C  | ADD  | 3817  | 1.04     | 0.05066  | 0.9417  | 1.149  | 0.7751    | 0.4383   |
| 16  | rs9926350  | 84558192 | A  | ADD  | 2490  | 1.145    | 0.06285  | 1.012   | 1.295  | 2.153     | 0.03135  |
| 16  | rs9934574  | 84558465 | T  | ADD  | 5203  | 0.9451   | 0.06321  | 0.835   | 1.07   | -0.893    | 0.3719   |
| 16  | rs9941263  | 84558545 | G  | ADD  | 4359  | 1.013    | 0.04667  | 0.9246  | 1.11   | 0.2802    | 0.7793   |
| 16  | rs9934725  | 84558585 | T  | ADD  | 4358  | 1.013    | 0.04667  | 0.9244  | 1.11   | 0.2765    | 0.7822   |
| 16  | 84558619   | 84558619 | T  | ADD  | 7287  | 0.3811   | 0.7189   | 0.09314 | 1.56   | -1.342    | 0.1797   |
| 16  | rs9938885  | 84558713 | G  | ADD  | 4342  | 1.016    | 0.0468   | 0.9271  | 1.114  | 0.3425    | 0.732    |
| 16  | rs11648475 | 84558762 | G  | ADD  | 3596  | 0.9497   | 0.0506   | 0.86    | 1.049  | -1.021    | 0.3074   |
| 16  | rs74032515 | 84558875 | G  | ADD  | 7048  | 0.7847   | 0.358    | 0.389   | 1.583  | -0.6774   | 0.4982   |
| 16  | rs74032517 | 84558990 | 0  | ADD  | 7383  | NA       | NA       | NA      | NA     | NA        | NA       |
| 16  | rs72807046 | 84559122 | T  | ADD  | 6488  | 0.7408   | 0.2146   | 0.4864  | 1.128  | -1.398    | 0.1621   |
| 16  | 84559204   | 84559204 | C  | ADD  | 7366  | 2.267    | 1.12     | 0.2525  | 20.36  | 0.731     | 0.4648   |
| 16  | 84559353   | 84559353 | A  | ADD  | 7225  | 2.987    | 1.213    | 0.2774  | 32.16  | 0.9024    | 0.3669   |
| 16  | rs11860004 | 84559380 | A  | ADD  | 3862  | 0.9569   | 0.06475  | 0.8428  | 1.086  | -0.681    | 0.4959   |
| 16  | rs34912238 | 84559404 | T  | ADD  | 6905  | 0.8118   | 0.04748  | 0.7396  | 0.8909 | -4.392    | 1.12E-05 |
| 16  | rs35655122 | 84559618 | T  | ADD  | 5249  | 0.9522   | 0.06295  | 0.8417  | 1.077  | -0.7778   | 0.4367   |
| 16  | rs11862493 | 84559626 | C  | ADD  | 5248  | 0.954    | 0.06297  | 0.8432  | 1.079  | -0.748    | 0.4544   |
| 16  | rs11859186 | 84559852 | C  | ADD  | 5053  | 1.008    | 0.07011  | 0.8783  | 1.156  | 0.1084    | 0.9137   |

Table S5. Conditioning on rs4843869

| CHR | SNP        | BP       | A1 | TEST | NMISS | OR       | SE       | L95     | U95    | STAT     | P        |
|-----|------------|----------|----|------|-------|----------|----------|---------|--------|----------|----------|
| 16  | rs11861580 | 84456048 | G  | ADD  | 7300  | 0.8747   | 0.06893  | 0.7641  | 1.001  | -1.942   | 0.05208  |
| 16  | rs9934049  | 84456117 | T  | ADD  | 6031  | 1.116    | 0.09567  | 0.9252  | 1.346  | 1.147    | 0.2515   |
| 16  | 84456852   | 84456852 | A  | ADD  | 7360  | 0.7769   | 0.3067   | 0.4259  | 1.417  | -0.8232  | 0.4104   |
| 16  | 84457076   | 84457076 | T  | ADD  | 7345  | 1.46E+09 | 1.67E+04 | 0       | inf    | 0.001267 | 0.999    |
| 16  | rs16939834 | 84458109 | C  | ADD  | 7363  | 0.7769   | 0.2356   | 0.4896  | 1.233  | -1.071   | 0.284    |
| 16  | 84458146   | 84458146 | A  | ADD  | 7356  | 9.80E+08 | 1.72E+04 | 0       | inf    | 0.001201 | 0.999    |
| 16  | rs11864884 | 84458540 | T  | ADD  | 7356  | 1.004    | 0.03844  | 0.9308  | 1.082  | 0.09345  | 0.9255   |
| 16  | rs7185918  | 84458566 | T  | ADD  | 7362  | 1.022    | 0.04303  | 0.9397  | 1.112  | 0.515    | 0.6065   |
| 16  | 84458726   | 84458726 | C  | ADD  | 7338  | 1.272    | 0.1951   | 0.868   | 1.865  | 1.234    | 0.217    |
| 16  | rs72805167 | 84458737 | G  | ADD  | 7189  | 1.302    | 0.4354   | 0.5547  | 3.057  | 0.6064   | 0.5443   |
| 16  | 84458834   | 84458834 | O  | ADD  | 6364  | NA       | NA       | NA      | NA     | NA       | NA       |
| 16  | rs11859433 | 84458903 | C  | ADD  | 7315  | 0.8715   | 0.06964  | 0.7603  | 0.999  | -1.975   | 0.04828  |
| 16  | 84459157   | 84459157 | G  | ADD  | 7047  | 0.85     | 0.07112  | 0.7394  | 0.9772 | -2.285   | 0.02233  |
| 16  | rs12926601 | 84459167 | T  | ADD  | 7089  | 1.046    | 0.04426  | 0.9595  | 1.141  | 1.026    | 0.3047   |
| 16  | rs4843854  | 84460016 | C  | ADD  | 7336  | 1.038    | 0.03597  | 0.9672  | 1.114  | 1.032    | 0.3019   |
| 16  | rs4843855  | 84460047 | T  | ADD  | 6847  | 1.002    | 0.03922  | 0.9279  | 1.082  | 0.0514   | 0.959    |
| 16  | rs4843856  | 84460058 | C  | ADD  | 7340  | 1.016    | 0.03515  | 0.9486  | 1.089  | 0.4581   | 0.6469   |
| 16  | rs12930347 | 84461177 | C  | ADD  | 7358  | 1.027    | 0.04182  | 0.9461  | 1.115  | 0.6349   | 0.5255   |
| 16  | 84461320   | 84461320 | O  | ADD  | 7363  | NA       | NA       | NA      | NA     | NA       | NA       |
| 16  | rs62052470 | 84461723 | A  | ADD  | 6813  | 0.8578   | 0.09499  | 0.712   | 1.033  | -1.615   | 0.1063   |
| 16  | 84461729   | 84461729 | O  | ADD  | 7366  | NA       | NA       | NA      | NA     | NA       | NA       |
| 16  | rs62052471 | 84462333 | G  | ADD  | 6607  | 0.906    | 0.1154   | 0.7226  | 1.136  | -0.8548  | 0.3926   |
| 16  | 84462405   | 84462405 | A  | ADD  | 6273  | 1.015    | 0.04431  | 0.9309  | 1.107  | 0.3443   | 0.7306   |
| 16  | 84462407   | 84462407 | A  | ADD  | 5646  | 1.037    | 0.04888  | 0.9418  | 1.141  | 0.7343   | 0.4628   |
| 16  | 84462423   | 84462423 | A  | ADD  | 5143  | 1.031    | 0.1262   | 0.8051  | 1.32   | 0.2416   | 0.8091   |
| 16  | 84462425   | 84462425 | A  | ADD  | 3722  | 1.18     | 0.09277  | 0.9835  | 1.415  | 1.781    | 0.07493  |
| 16  | 84462437   | 84462437 | C  | ADD  | 3961  | 1.114    | 0.09838  | 0.9185  | 1.351  | 1.095    | 0.2733   |
| 16  | 84462507   | 84462507 | C  | ADD  | 4975  | 1.086    | 0.1003   | 0.8923  | 1.322  | 0.8245   | 0.4096   |
| 16  | 84462539   | 84462539 | C  | ADD  | 7085  | 0.8944   | 0.1162   | 0.7122  | 1.123  | -0.9604  | 0.3368   |
| 16  | rs55697192 | 84462546 | C  | ADD  | 6019  | 1.027    | 0.07288  | 0.89    | 1.184  | 0.3614   | 0.7178   |
| 16  | 84463073   | 84463073 | A  | ADD  | 6673  | 1.385    | 0.2282   | 0.8855  | 2.166  | 1.427    | 0.1536   |
| 16  | 84463237   | 84463237 | T  | ADD  | 7202  | 0.8721   | 0.1952   | 0.5948  | 1.279  | -0.7011  | 0.4832   |
| 16  | rs12935659 | 84463429 | C  | ADD  | 7341  | 0.9721   | 0.03802  | 0.9023  | 1.047  | -0.7444  | 0.4566   |
| 16  | 84463607   | 84463607 | O  | ADD  | 7367  | NA       | NA       | NA      | NA     | NA       | NA       |
| 16  | rs72805168 | 84463633 | C  | ADD  | 7231  | 1.3      | 0.974    | 0.1928  | 8.772  | 0.2697   | 0.7874   |
| 16  | rs62052474 | 84463910 | A  | ADD  | 7335  | 0.8368   | 0.06665  | 0.7344  | 0.9536 | -2.673   | 0.007524 |
| 16  | 84463953   | 84463953 | T  | ADD  | 7321  | 0.8944   | 1.415    | 0.05581 | 14.33  | -0.07884 | 0.9372   |
| 16  | 84463987   | 84463987 | O  | ADD  | 7367  | NA       | NA       | NA      | NA     | NA       | NA       |
| 16  | 84464105   | 84464105 | O  | ADD  | 7367  | NA       | NA       | NA      | NA     | NA       | NA       |
| 16  | rs11648716 | 84464117 | G  | ADD  | 7366  | 0.8474   | 0.06576  | 0.7449  | 0.964  | -2.517   | 0.01183  |
| 16  | rs8056522  | 84464397 | C  | ADD  | 7357  | 1.03     | 0.04358  | 0.9457  | 1.122  | 0.6793   | 0.4969   |
| 16  | rs9929675  | 84464599 | A  | ADD  | 7333  | 0.9767   | 0.03827  | 0.9061  | 1.053  | -0.6172  | 0.5371   |
| 16  | rs9929701  | 84464675 | C  | ADD  | 7334  | 0.9769   | 0.03827  | 0.9063  | 1.053  | -0.6098  | 0.542    |
| 16  | rs9924234  | 84465076 | C  | ADD  | 7338  | 0.9782   | 0.03826  | 0.9076  | 1.054  | -0.5755  | 0.565    |
| 16  | rs9930043  | 84465079 | C  | ADD  | 7345  | 0.9772   | 0.03825  | 0.9067  | 1.053  | -0.6017  | 0.5474   |
| 16  | 84465151   | 84465151 | C  | ADD  | 7304  | 1.041    | 0.04321  | 0.9568  | 1.133  | 0.9381   | 0.3482   |
| 16  | rs9932359  | 84465411 | A  | ADD  | 7337  | 0.978    | 0.03826  | 0.9074  | 1.054  | -0.5812  | 0.5611   |
| 16  | rs12448297 | 84467210 | O  | ADD  | 7367  | NA       | NA       | NA      | NA     | NA       | NA       |
| 16  | rs13336885 | 84469034 | C  | ADD  | 7217  | 0.9794   | 0.03843  | 0.9084  | 1.056  | -0.5405  | 0.5888   |
| 16  | rs7200396  | 84469798 | C  | ADD  | 7338  | 0.9712   | 0.038    | 0.9015  | 1.046  | -0.7686  | 0.4421   |
| 16  | rs9923975  | 84469936 | G  | ADD  | 7323  | 1.05     | 0.04392  | 0.9638  | 1.145  | 1.121    | 0.2623   |
| 16  | rs9932159  | 84470103 | T  | ADD  | 7341  | 0.9716   | 0.03812  | 0.9016  | 1.047  | -0.7563  | 0.4495   |
| 16  | rs9936199  | 84470118 | G  | ADD  | 7341  | 0.9713   | 0.038    | 0.9016  | 1.046  | -0.7672  | 0.443    |

| CHR | SNP        | BP       | A1 | TEST | NMISS | OR       | SE       | L95    | U95    | STAT       | P        |
|-----|------------|----------|----|------|-------|----------|----------|--------|--------|------------|----------|
| 16  | rs750669   | 84470371 | G  | ADD  | 7295  | 1.013    | 0.03538  | 0.9452 | 1.086  | 0.3682     | 0.7127   |
| 16  | rs2017161  | 84470594 | C  | ADD  | 7198  | 0.9641   | 0.03817  | 0.8946 | 1.039  | -0.9568    | 0.3387   |
| 16  | 84470606   | 84470606 | A  | ADD  | 7326  | 1.008    | 0.03517  | 0.9412 | 1.08   | 0.2369     | 0.8127   |
| 16  | 84471137   | 84471137 | G  | ADD  | 7340  | 8.00E+08 | 1.72E+04 | 0      | inf    | 0.001189   | 0.9991   |
| 16  | 84471981   | 84471981 | T  | ADD  | 6623  | 0.868    | 0.1337   | 0.6679 | 1.128  | -1.059     | 0.2895   |
| 16  | 84472217   | 84472217 | T  | ADD  | 6942  | 3.98E-10 | 2.44E+04 | 0      | inf    | -0.0008878 | 0.9993   |
| 16  | rs55967832 | 84472469 | C  | ADD  | 7129  | 1.006    | 0.0356   | 0.9383 | 1.079  | 0.1696     | 0.8653   |
| 16  | rs9925103  | 84472609 | G  | ADD  | 7034  | 0.8155   | 0.2308   | 0.5188 | 1.282  | -0.8834    | 0.377    |
| 16  | rs34318854 | 84472707 | C  | ADD  | 7128  | 1.006    | 0.03559  | 0.9383 | 1.079  | 0.1693     | 0.8655   |
| 16  | rs34723871 | 84472711 | C  | ADD  | 7128  | 1.006    | 0.03559  | 0.9383 | 1.079  | 0.1693     | 0.8655   |
| 16  | rs56143130 | 84472719 | C  | ADD  | 7128  | 1.006    | 0.03559  | 0.9383 | 1.079  | 0.1693     | 0.8655   |
| 16  | rs9925282  | 84472806 | O  | ADD  | 7367  | NA       | NA       | NA     | NA     | NA         | NA       |
| 16  | rs9931862  | 84472878 | T  | ADD  | 7134  | 1.07     | 0.04411  | 0.9818 | 1.167  | 1.544      | 0.1225   |
| 16  | rs9931687  | 84473282 | A  | ADD  | 7348  | 1.09     | 0.04365  | 1.001  | 1.188  | 1.978      | 0.04795  |
| 16  | rs6540231  | 84473561 | G  | ADD  | 7323  | 0.9957   | 0.03513  | 0.9294 | 1.067  | -0.124     | 0.9013   |
| 16  | 84473745   | 84473745 | O  | ADD  | 6374  | NA       | NA       | NA     | NA     | NA         | NA       |
| 16  | 84474001   | 84474001 | C  | ADD  | 6374  | 0.946    | 0.04455  | 0.8669 | 1.032  | -1.245     | 0.213    |
| 16  | 84474531   | 84474531 | C  | ADD  | 6673  | 0.8714   | 0.8632   | 0.1605 | 4.732  | -0.1594    | 0.8734   |
| 16  | rs367170   | 84474588 | A  | ADD  | 4813  | 1.184    | 0.09866  | 0.9762 | 1.437  | 1.716      | 0.08614  |
| 16  | rs409219   | 84474592 | T  | ADD  | 4737  | 1.34     | 0.1207   | 1.058  | 1.698  | 2.425      | 0.01533  |
| 16  | 84474714   | 84474714 | C  | ADD  | 5032  | 1.061    | 0.05747  | 0.9476 | 1.187  | 1.023      | 0.3065   |
| 16  | rs62052475 | 84474717 | C  | ADD  | 5041  | 1.062    | 0.0573   | 0.9489 | 1.188  | 1.045      | 0.2958   |
| 16  | 84474721   | 84474721 | C  | ADD  | 5720  | 1.048    | 0.1593   | 0.767  | 1.432  | 0.2947     | 0.7682   |
| 16  | rs426900   | 84474799 | C  | ADD  | 6735  | 0.9894   | 0.07632  | 0.852  | 1.149  | -0.1393    | 0.8892   |
| 16  | rs9937847  | 84475052 | C  | ADD  | 7352  | 0.9816   | 0.06673  | 0.8613 | 1.119  | -0.2783    | 0.7808   |
| 16  | rs16939877 | 84475320 | A  | ADD  | 6787  | 0.8473   | 0.1117   | 0.6807 | 1.055  | -1.484     | 0.1377   |
| 16  | rs376783   | 84475324 | A  | ADD  | 7359  | 1.097    | 0.04132  | 1.012  | 1.19   | 2.246      | 0.02471  |
| 16  | rs428578   | 84475445 | G  | ADD  | 7263  | 1.017    | 0.03627  | 0.9468 | 1.091  | 0.4534     | 0.6503   |
| 16  | 84475528   | 84475528 | A  | ADD  | 7003  | 0.7633   | 0.2024   | 0.5133 | 1.135  | -1.335     | 0.182    |
| 16  | rs371800   | 84475621 | T  | ADD  | 7339  | 1.169    | 0.09123  | 0.9778 | 1.398  | 1.714      | 0.08648  |
| 16  | rs447377   | 84476336 | G  | ADD  | 7336  | 1.014    | 0.03611  | 0.9443 | 1.088  | 0.3736     | 0.7087   |
| 16  | rs9936406  | 84476343 | T  | ADD  | 7361  | 0.9868   | 0.03712  | 0.9176 | 1.061  | -0.3579    | 0.7204   |
| 16  | 84476544   | 84476544 | C  | ADD  | 7301  | 0.9715   | 0.06961  | 0.8476 | 1.113  | -0.4156    | 0.6777   |
| 16  | rs439390   | 84476707 | G  | ADD  | 7101  | 0.9992   | 0.03669  | 0.9299 | 1.074  | -0.02105   | 0.9832   |
| 16  | 84476754   | 84476754 | C  | ADD  | 7324  | 0.8025   | 0.07751  | 0.6894 | 0.9342 | -2.839     | 0.00453  |
| 16  | rs9928868  | 84476971 | C  | ADD  | 7323  | 1.134    | 0.5866   | 0.3591 | 3.579  | 0.2138     | 0.8307   |
| 16  | rs384915   | 84477113 | A  | ADD  | 7306  | 1.136    | 0.0937   | 0.9454 | 1.365  | 1.361      | 0.1736   |
| 16  | 84477167   | 84477167 | C  | ADD  | 4695  | 0.9236   | 0.07419  | 0.7986 | 1.068  | -1.071     | 0.2843   |
| 16  | 84477725   | 84477725 | A  | ADD  | 7357  | 3.661    | 1.281    | 0.2974 | 45.06  | 1.013      | 0.311    |
| 16  | rs438968   | 84477729 | C  | ADD  | 7315  | 1.01     | 0.036    | 0.9416 | 1.084  | 0.2874     | 0.7738   |
| 16  | rs12596376 | 84477898 | C  | ADD  | 7243  | 0.9892   | 0.03975  | 0.9151 | 1.069  | -0.2723    | 0.7854   |
| 16  | rs370703   | 84477981 | T  | ADD  | 7356  | 1.012    | 0.03598  | 0.943  | 1.086  | 0.3278     | 0.7431   |
| 16  | 84478065   | 84478065 | G  | ADD  | 7340  | 0.5878   | 0.7949   | 0.1238 | 2.791  | -0.6686    | 0.5038   |
| 16  | rs395922   | 84478180 | C  | ADD  | 6961  | 1.079    | 0.09489  | 0.8959 | 1.3    | 0.8011     | 0.4231   |
| 16  | rs6540232  | 84478303 | C  | ADD  | 7264  | 0.9895   | 0.0373   | 0.9197 | 1.065  | -0.2828    | 0.7773   |
| 16  | 84478601   | 84478601 | C  | ADD  | 7340  | 1.165    | 0.09506  | 0.9672 | 1.404  | 1.609      | 0.1077   |
| 16  | rs448136   | 84478848 | C  | ADD  | 6976  | 0.9925   | 0.03617  | 0.9245 | 1.065  | -0.2093    | 0.8342   |
| 16  | 84478905   | 84478905 | C  | ADD  | 7362  | 0.8511   | 0.2988   | 0.4739 | 1.529  | -0.5395    | 0.5896   |
| 16  | rs11642286 | 84479110 | G  | ADD  | 7363  | 0.7995   | 0.07564  | 0.6893 | 0.9272 | -2.959     | 0.003087 |
| 16  | rs391821   | 84479528 | T  | ADD  | 7060  | 1.025    | 0.09524  | 0.8508 | 1.236  | 0.263      | 0.7925   |
| 16  | rs428530   | 84480360 | G  | ADD  | 7309  | 1.143    | 0.09178  | 0.9552 | 1.369  | 1.46       | 0.1442   |
| 16  | rs11866609 | 84480582 | G  | ADD  | 7365  | 1.374    | 0.394    | 0.6347 | 2.973  | 0.8059     | 0.4203   |
| 16  | rs421710   | 84481015 | C  | ADD  | 7363  | 1.007    | 0.03597  | 0.9385 | 1.081  | 0.1953     | 0.8452   |

| CHR | SNP        | BP       | A1 | TEST | NMISS | OR       | SE       | L95    | U95    | STAT     | P        |
|-----|------------|----------|----|------|-------|----------|----------|--------|--------|----------|----------|
| 16  | rs9308363  | 84481566 | C  | ADD  | 7322  | 0.9855   | 0.03683  | 0.9169 | 1.059  | -0.3963  | 0.6919   |
| 16  | 84481963   | 84481963 | A  | ADD  | 6866  | 0.8019   | 0.3322   | 0.4182 | 1.538  | -0.6646  | 0.5063   |
| 16  | rs433322   | 84482073 | G  | ADD  | 7303  | 1.01     | 0.03597  | 0.9416 | 1.084  | 0.2868   | 0.7743   |
| 16  | rs11860464 | 84482464 | T  | ADD  | 7214  | 0.9703   | 0.5243   | 0.3473 | 2.711  | -0.0575  | 0.9541   |
| 16  | 84482479   | 84482479 | C  | ADD  | 7315  | 0.9863   | 0.03686  | 0.9176 | 1.06   | -0.3741  | 0.7083   |
| 16  | 84482626   | 84482626 | O  | ADD  | 7088  | NA       | NA       | NA     | NA     | NA       | NA       |
| 16  | rs401528   | 84482872 | G  | ADD  | 7278  | 1.15     | 0.08885  | 0.9661 | 1.369  | 1.571    | 0.1161   |
| 16  | rs7193803  | 84483174 | G  | ADD  | 7364  | 0.9844   | 0.03685  | 0.9158 | 1.058  | -0.4263  | 0.6699   |
| 16  | 84483336   | 84483336 | O  | ADD  | 7355  | NA       | NA       | NA     | NA     | NA       | NA       |
| 16  | rs11117411 | 84483439 | T  | ADD  | 7279  | 0.8015   | 0.07719  | 0.6889 | 0.9324 | -2.867   | 0.004138 |
| 16  | rs437740   | 84483537 | C  | ADD  | 7340  | 1.142    | 0.09277  | 0.9521 | 1.37   | 1.431    | 0.1524   |
| 16  | 84483596   | 84483596 | A  | ADD  | 7162  | 0.7309   | 0.2065   | 0.4876 | 1.096  | -1.518   | 0.1291   |
| 16  | rs438323   | 84483902 | C  | ADD  | 7338  | 1.145    | 0.09286  | 0.9549 | 1.374  | 1.463    | 0.1436   |
| 16  | rs12922615 | 84484196 | T  | ADD  | 7267  | 0.9455   | 0.07069  | 0.8232 | 1.086  | -0.7923  | 0.4282   |
| 16  | rs394100   | 84484220 | A  | ADD  | 7159  | 1.102    | 0.08952  | 0.9244 | 1.313  | 1.082    | 0.2791   |
| 16  | rs395498   | 84484222 | G  | ADD  | 7279  | 1.017    | 0.03607  | 0.9474 | 1.091  | 0.461    | 0.6448   |
| 16  | rs452478   | 84484245 | G  | ADD  | 7337  | 1.138    | 0.09273  | 0.9493 | 1.365  | 1.399    | 0.1619   |
| 16  | rs452532   | 84484267 | G  | ADD  | 7336  | 1.144    | 0.09284  | 0.9537 | 1.372  | 1.45     | 0.1471   |
| 16  | rs11117412 | 84484343 | A  | ADD  | 7065  | 1.009    | 0.0405   | 0.932  | 1.092  | 0.2212   | 0.8249   |
| 16  | rs434216   | 84484514 | C  | ADD  | 7010  | 1.008    | 0.03632  | 0.9383 | 1.082  | 0.2068   | 0.8362   |
| 16  | rs1809094  | 84484727 | A  | ADD  | 6668  | 1.024    | 0.04373  | 0.9394 | 1.115  | 0.5315   | 0.5951   |
| 16  | 84484809   | 84484809 | G  | ADD  | 7231  | 1.58     | 0.3737   | 0.7596 | 3.287  | 1.224    | 0.2208   |
| 16  | rs572967   | 84484995 | G  | ADD  | 7226  | 0.9955   | 0.03668  | 0.9264 | 1.07   | -0.1233  | 0.9019   |
| 16  | rs896263   | 84485020 | G  | ADD  | 7360  | 1.05     | 0.03959  | 0.9712 | 1.134  | 1.221    | 0.222    |
| 16  | rs403605   | 84485129 | A  | ADD  | 7353  | 0.9407   | 0.0601   | 0.8361 | 1.058  | -1.018   | 0.3089   |
| 16  | rs454128   | 84485236 | G  | ADD  | 7010  | 1.018    | 0.03994  | 0.9418 | 1.101  | 0.4584   | 0.6467   |
| 16  | rs391023   | 84485315 | T  | ADD  | 7313  | 1.032    | 0.03605  | 0.9611 | 1.107  | 0.8602   | 0.3897   |
| 16  | rs375288   | 84485372 | A  | ADD  | 7248  | 1.01     | 0.03697  | 0.9395 | 1.086  | 0.2722   | 0.7855   |
| 16  | rs446836   | 84485520 | T  | ADD  | 7017  | 0.7327   | 0.2987   | 0.408  | 1.316  | -1.041   | 0.2977   |
| 16  | rs873616   | 84485667 | G  | ADD  | 7039  | 1.093    | 0.0456   | 0.9996 | 1.195  | 1.95     | 0.05116  |
| 16  | 84485701   | 84485701 | O  | ADD  | 7366  | NA       | NA       | NA     | NA     | NA       | NA       |
| 16  | rs60241040 | 84486065 | G  | ADD  | 7294  | 1.08     | 0.04463  | 0.9894 | 1.179  | 1.722    | 0.08509  |
| 16  | rs391855   | 84486122 | T  | ADD  | 7356  | 1.019    | 0.03516  | 0.9511 | 1.092  | 0.535    | 0.5926   |
| 16  | rs12149363 | 84486206 | G  | ADD  | 7290  | 0.9422   | 0.07053  | 0.8205 | 1.082  | -0.8448  | 0.3982   |
| 16  | rs386098   | 84486701 | A  | ADD  | 7167  | 0.9461   | 0.06912  | 0.8262 | 1.083  | -0.8022  | 0.4224   |
| 16  | rs369173   | 84486783 | G  | ADD  | 7361  | 1.021    | 0.0349   | 0.9535 | 1.093  | 0.5962   | 0.551    |
| 16  | rs398114   | 84486785 | C  | ADD  | 7148  | 1.023    | 0.03547  | 0.9544 | 1.097  | 0.6453   | 0.5187   |
| 16  | rs369597   | 84486935 | C  | ADD  | 7350  | 0.9419   | 0.0687   | 0.8232 | 1.078  | -0.8718  | 0.3833   |
| 16  | rs9924391  | 84487331 | T  | ADD  | 7359  | 0.9302   | 0.06963  | 0.8116 | 1.066  | -1.039   | 0.2989   |
| 16  | rs9932449  | 84487333 | A  | ADD  | 7356  | 0.9361   | 0.06865  | 0.8183 | 1.071  | -0.9615  | 0.3363   |
| 16  | rs371391   | 84487395 | C  | ADD  | 7356  | 0.9473   | 0.06889  | 0.8276 | 1.084  | -0.7866  | 0.4315   |
| 16  | rs388405   | 84487398 | A  | ADD  | 7365  | 0.9325   | 0.06834  | 0.8156 | 1.066  | -1.023   | 0.3061   |
| 16  | rs28368111 | 84487756 | C  | ADD  | 7327  | 1.643    | 0.4202   | 0.721  | 3.743  | 1.181    | 0.2375   |
| 16  | 84487779   | 84487779 | T  | ADD  | 7310  | 9.84E+08 | 1.72E+04 | 0      | inf    | 0.001201 | 0.999    |
| 16  | rs381139   | 84487901 | C  | ADD  | 7252  | 0.9407   | 0.0699   | 0.8202 | 1.079  | -0.875   | 0.3816   |
| 16  | rs393512   | 84488072 | C  | ADD  | 7308  | 0.9258   | 0.06826  | 0.8098 | 1.058  | -1.13    | 0.2586   |
| 16  | rs416515   | 84488175 | C  | ADD  | 7301  | 0.9367   | 0.06988  | 0.8168 | 1.074  | -0.9365  | 0.349    |
| 16  | rs398229   | 84488191 | A  | ADD  | 7301  | 0.9367   | 0.06988  | 0.8168 | 1.074  | -0.9365  | 0.349    |
| 16  | 84488361   | 84488361 | C  | ADD  | 1974  | 1.126    | 0.123    | 0.8849 | 1.433  | 0.9658   | 0.3341   |
| 16  | 84488362   | 84488362 | C  | ADD  | 3752  | 0.9901   | 0.12     | 0.7825 | 1.253  | -0.08301 | 0.9338   |
| 16  | rs28368112 | 84488458 | C  | ADD  | 6963  | 1.1      | 0.04447  | 1.008  | 1.2    | 2.145    | 0.03197  |
| 16  | 84488780   | 84488780 | C  | ADD  | 7083  | 0.5506   | 0.328    | 0.2895 | 1.047  | -1.819   | 0.06894  |
| 16  | rs170033   | 84489005 | A  | ADD  | 6632  | 0.9785   | 0.06626  | 0.8593 | 1.114  | -0.3283  | 0.7427   |



| CHR | SNP        | BP       | A1 | TEST | NMISS | OR     | SE      | L95    | U95    | STAT      | P       |
|-----|------------|----------|----|------|-------|--------|---------|--------|--------|-----------|---------|
| 16  | 84489382   | 84489382 | 0  | ADD  | 7366  | NA     | NA      | NA     | NA     | NA        | NA      |
| 16  | rs4843859  | 84489457 | G  | ADD  | 7286  | 1.086  | 0.04305 | 0.9983 | 1.182  | 1.92      | 0.05488 |
| 16  | rs8058349  | 84489530 | G  | ADD  | 7335  | 0.879  | 0.07114 | 0.7646 | 1.01   | -1.814    | 0.06974 |
| 16  | rs191022   | 84489633 | G  | ADD  | 7236  | 1.046  | 0.0393  | 0.9683 | 1.13   | 1.14      | 0.2544  |
| 16  | rs188602   | 84489852 | T  | ADD  | 7214  | 0.9166 | 0.06969 | 0.7996 | 1.051  | -1.249    | 0.2116  |
| 16  | rs422186   | 84489971 | A  | ADD  | 7317  | 0.9217 | 0.07024 | 0.8031 | 1.058  | -1.161    | 0.2456  |
| 16  | rs56177354 | 84490153 | T  | ADD  | 6667  | 0.8013 | 0.2986  | 0.4463 | 1.439  | -0.7417   | 0.4583  |
| 16  | rs2270501  | 84490489 | T  | ADD  | 7358  | 1.09   | 0.04494 | 0.9985 | 1.191  | 1.927     | 0.05401 |
| 16  | rs2270502  | 84490539 | T  | ADD  | 7178  | 0.9124 | 0.07536 | 0.7871 | 1.058  | -1.217    | 0.2235  |
| 16  | 84490567   | 84490567 | 0  | ADD  | 7358  | NA     | NA      | NA     | NA     | NA        | NA      |
| 16  | 84490724   | 84490724 | A  | ADD  | 7309  | 1.001  | 1.065   | 0.1241 | 8.076  | 0.0008653 | 0.9993  |
| 16  | 84491082   | 84491082 | A  | ADD  | 7279  | 1.227  | 0.09634 | 1.016  | 1.482  | 2.121     | 0.03389 |
| 16  | rs56196648 | 84491219 | A  | ADD  | 6585  | 1.004  | 0.1349  | 0.7709 | 1.308  | 0.03171   | 0.9747  |
| 16  | rs305084   | 84491669 | C  | ADD  | 7296  | 1.1    | 0.05891 | 0.9799 | 1.234  | 1.615     | 0.1064  |
| 16  | rs12447817 | 84491725 | A  | ADD  | 5183  | 1.216  | 0.148   | 0.9097 | 1.625  | 1.321     | 0.1866  |
| 16  | 84491886   | 84491886 | G  | ADD  | 7325  | 2.548  | 0.3879  | 1.191  | 5.45   | 2.411     | 0.0159  |
| 16  | 84491947   | 84491947 | 0  | ADD  | 7367  | NA     | NA      | NA     | NA     | NA        | NA      |
| 16  | 84492016   | 84492016 | C  | ADD  | 7161  | 0.9412 | 0.07393 | 0.8143 | 1.088  | -0.8193   | 0.4126  |
| 16  | rs1519978  | 84492712 | T  | ADD  | 7332  | 0.9878 | 0.04694 | 0.901  | 1.083  | -0.2608   | 0.7942  |
| 16  | rs16939906 | 84493007 | A  | ADD  | 7290  | 1.387  | 0.5756  | 0.449  | 4.287  | 0.5689    | 0.5694  |
| 16  | 84493033   | 84493033 | C  | ADD  | 5844  | 0.8065 | 0.2732  | 0.4721 | 1.378  | -0.7873   | 0.4311  |
| 16  | rs16882    | 84493074 | C  | ADD  | 7354  | 0.9829 | 0.04679 | 0.8967 | 1.077  | -0.3695   | 0.7118  |
| 16  | rs11649549 | 84493298 | C  | ADD  | 7345  | 0.9796 | 0.04682 | 0.8937 | 1.074  | -0.4412   | 0.6591  |
| 16  | rs305083   | 84493379 | G  | ADD  | 7225  | 0.9643 | 0.04781 | 0.878  | 1.059  | -0.7607   | 0.4468  |
| 16  | rs12924316 | 84493764 | T  | ADD  | 7361  | 1.075  | 0.04478 | 0.9851 | 1.174  | 1.624     | 0.1044  |
| 16  | 84493893   | 84493893 | C  | ADD  | 4257  | 1.159  | 0.06214 | 1.026  | 1.309  | 2.376     | 0.01749 |
| 16  | 84493900   | 84493900 | C  | ADD  | 4320  | 1.157  | 0.06204 | 1.025  | 1.307  | 2.357     | 0.01842 |
| 16  | 84493903   | 84493903 | C  | ADD  | 4321  | 1.154  | 0.06201 | 1.022  | 1.303  | 2.311     | 0.02084 |
| 16  | 84493958   | 84493958 | C  | ADD  | 7341  | 1.473  | 0.4361  | 0.6267 | 3.464  | 0.8885    | 0.3743  |
| 16  | 84494383   | 84494383 | T  | ADD  | 7196  | 0.9698 | 0.1928  | 0.6646 | 1.415  | -0.1588   | 0.8738  |
| 16  | rs305082   | 84494479 | C  | ADD  | 7357  | 0.9815 | 0.04654 | 0.896  | 1.075  | -0.401    | 0.6884  |
| 16  | 84494689   | 84494689 | 0  | ADD  | 7344  | NA     | NA      | NA     | NA     | NA        | NA      |
| 16  | 84494863   | 84494863 | C  | ADD  | 7329  | 1.258  | 0.09392 | 1.046  | 1.512  | 2.444     | 0.01454 |
| 16  | 84495087   | 84495087 | T  | ADD  | 7195  | 2.455  | 0.9243  | 0.4011 | 15.02  | 0.9717    | 0.3312  |
| 16  | rs182511   | 84495157 | G  | ADD  | 7364  | 1.207  | 0.13    | 0.9352 | 1.557  | 1.444     | 0.1486  |
| 16  | 84495288   | 84495288 | 0  | ADD  | 6994  | NA     | NA      | NA     | NA     | NA        | NA      |
| 16  | 84495780   | 84495780 | A  | ADD  | 7346  | 1.504  | 1.07    | 0.1847 | 12.25  | 0.3815    | 0.7028  |
| 16  | 84495918   | 84495918 | C  | ADD  | 4704  | 1.215  | 0.1619  | 0.8845 | 1.668  | 1.202     | 0.2294  |
| 16  | 84495937   | 84495937 | C  | ADD  | 5804  | 0.899  | 0.1113  | 0.7228 | 1.118  | -0.9558   | 0.3392  |
| 16  | 84495977   | 84495977 | C  | ADD  | 7080  | 0.9135 | 0.1844  | 0.6364 | 1.311  | -0.4906   | 0.6237  |
| 16  | rs11642583 | 84496096 | G  | ADD  | 7324  | 0.9017 | 0.05209 | 0.8142 | 0.9986 | -1.986    | 0.04703 |
| 16  | rs9940980  | 84496182 | T  | ADD  | 7363  | 0.9123 | 0.05197 | 0.824  | 1.01   | -1.766    | 0.07739 |
| 16  | rs9926664  | 84496256 | G  | ADD  | 7340  | 0.9116 | 0.05214 | 0.8231 | 1.01   | -1.774    | 0.07604 |
| 16  | rs11646550 | 84496336 | A  | ADD  | 7313  | 0.9115 | 0.05238 | 0.8226 | 1.01   | -1.769    | 0.07695 |
| 16  | 84496676   | 84496676 | 0  | ADD  | 7356  | NA     | NA      | NA     | NA     | NA        | NA      |
| 16  | 84496724   | 84496724 | 0  | ADD  | 7366  | NA     | NA      | NA     | NA     | NA        | NA      |
| 16  | 84496745   | 84496745 | C  | ADD  | 7076  | 1.52   | 1.07    | 0.1866 | 12.39  | 0.3914    | 0.6955  |
| 16  | 84496751   | 84496751 | C  | ADD  | 7076  | 1.52   | 1.07    | 0.1866 | 12.39  | 0.3914    | 0.6955  |
| 16  | rs3794662  | 84497151 | A  | ADD  | 7350  | 1.267  | 0.09356 | 1.054  | 1.522  | 2.526     | 0.01152 |
| 16  | 84497159   | 84497159 | 0  | ADD  | 7359  | NA     | NA      | NA     | NA     | NA        | NA      |
| 16  | rs3794661  | 84497167 | A  | ADD  | 7323  | 1.231  | 0.09426 | 1.024  | 1.481  | 2.208     | 0.02724 |
| 16  | rs62052556 | 84497511 | T  | ADD  | 7281  | 0.8975 | 0.05314 | 0.8087 | 0.996  | -2.036    | 0.0418  |
| 16  | 84497894   | 84497894 | G  | ADD  | 7257  | 1.03   | 0.7335  | 0.2446 | 4.337  | 0.04016   | 0.968   |

| CHR | SNP        | BP       | A1 | TEST | NMISS | OR     | SE      | L95     | U95    | STAT      | P        |
|-----|------------|----------|----|------|-------|--------|---------|---------|--------|-----------|----------|
| 16  | 84497914   | 84497914 | G  | ADD  | 7257  | 1.03   | 0.7335  | 0.2446  | 4.337  | 0.04016   | 0.968    |
| 16  | 84498477   | 84498477 | G  | ADD  | 7083  | 0.901  | 0.1299  | 0.6985  | 1.162  | -0.8028   | 0.4221   |
| 16  | rs4843320  | 84498514 | T  | ADD  | 7228  | 1.058  | 0.04677 | 0.9657  | 1.16   | 1.214     | 0.2247   |
| 16  | 84498527   | 84498527 | A  | ADD  | 7177  | 0.9708 | 0.1928  | 0.6653  | 1.417  | -0.1539   | 0.8777   |
| 16  | 84498533   | 84498533 | T  | ADD  | 7090  | 0.9889 | 0.3044  | 0.5445  | 1.796  | -0.03674  | 0.9707   |
| 16  | 84499184   | 84499184 | G  | ADD  | 7319  | 1.489  | 0.504   | 0.5545  | 3.998  | 0.79      | 0.4295   |
| 16  | rs305080   | 84499275 | T  | ADD  | 7265  | 1.02   | 0.03688 | 0.949   | 1.097  | 0.5395    | 0.5895   |
| 16  | 84499414   | 84499414 | G  | ADD  | 7147  | 1.193  | 0.1804  | 0.8373  | 1.698  | 0.9758    | 0.3291   |
| 16  | rs10514610 | 84499676 | C  | ADD  | 7365  | 1.226  | 0.09037 | 1.027   | 1.464  | 2.256     | 0.02409  |
| 16  | rs16939917 | 84499921 | A  | ADD  | 7307  | 1.232  | 0.09067 | 1.031   | 1.471  | 2.298     | 0.02157  |
| 16  | rs305079   | 84499997 | C  | ADD  | 7354  | 1.26   | 0.08736 | 1.062   | 1.496  | 2.648     | 0.008101 |
| 16  | 84500417   | 84500417 | O  | ADD  | 7334  | NA     | NA      | NA      | NA     | NA        | NA       |
| 16  | rs305078   | 84500644 | G  | ADD  | 7333  | 2.569  | 0.5902  | 0.8078  | 8.168  | 1.598     | 0.11     |
| 16  | rs3794660  | 84500669 | C  | ADD  | 7277  | 1.228  | 0.0968  | 1.016   | 1.485  | 2.125     | 0.03358  |
| 16  | 84500726   | 84500726 | T  | ADD  | 7177  | 0.9712 | 0.1928  | 0.6656  | 1.417  | -0.1515   | 0.8796   |
| 16  | rs305077   | 84500967 | C  | ADD  | 7360  | 1.036  | 0.03653 | 0.9643  | 1.113  | 0.966     | 0.3341   |
| 16  | 84501753   | 84501753 | O  | ADD  | 7359  | NA     | NA      | NA      | NA     | NA        | NA       |
| 16  | 84501767   | 84501767 | O  | ADD  | 7359  | NA     | NA      | NA      | NA     | NA        | NA       |
| 16  | 84501890   | 84501890 | O  | ADD  | 7367  | NA     | NA      | NA      | NA     | NA        | NA       |
| 16  | 84501918   | 84501918 | O  | ADD  | 7353  | NA     | NA      | NA      | NA     | NA        | NA       |
| 16  | rs391525   | 84501940 | G  | ADD  | 7355  | 1.033  | 0.03651 | 0.9618  | 1.11   | 0.8929    | 0.3719   |
| 16  | rs366304   | 84502301 | A  | ADD  | 7299  | 0.7723 | 0.5001  | 0.2898  | 2.058  | -0.5167   | 0.6054   |
| 16  | rs2292982  | 84502324 | G  | ADD  | 7361  | 1.041  | 0.03653 | 0.9691  | 1.118  | 1.1       | 0.2711   |
| 16  | 84502367   | 84502367 | O  | ADD  | 7316  | NA     | NA      | NA      | NA     | NA        | NA       |
| 16  | rs2292980  | 84502577 | C  | ADD  | 7360  | 1.043  | 0.03653 | 0.9708  | 1.12   | 1.148     | 0.2508   |
| 16  | 84502640   | 84502640 | A  | ADD  | 7365  | 1.852  | 0.7928  | 0.3916  | 8.759  | 0.7773    | 0.437    |
| 16  | rs8052064  | 84502732 | T  | ADD  | 7169  | 0.8816 | 0.0534  | 0.794   | 0.9788 | -2.361    | 0.01825  |
| 16  | rs16939945 | 84502750 | T  | ADD  | 7328  | 0.8429 | 0.1073  | 0.6831  | 1.04   | -1.593    | 0.1111   |
| 16  | 84502870   | 84502870 | T  | ADD  | 7365  | 0.8922 | 0.876   | 0.1603  | 4.968  | -0.1302   | 0.8964   |
| 16  | 84502888   | 84502888 | C  | ADD  | 7365  | 0.8922 | 0.876   | 0.1603  | 4.968  | -0.1302   | 0.8964   |
| 16  | rs1519976  | 84503176 | G  | ADD  | 7343  | 1.013  | 0.03492 | 0.9459  | 1.085  | 0.3662    | 0.7142   |
| 16  | rs768410   | 84503229 | G  | ADD  | 7348  | 1.013  | 0.03492 | 0.946   | 1.085  | 0.3704    | 0.7111   |
| 16  | rs147968   | 84503340 | C  | ADD  | 7337  | 1.012  | 0.03494 | 0.9448  | 1.083  | 0.3336    | 0.7387   |
| 16  | 84503481   | 84503481 | O  | ADD  | 7364  | NA     | NA      | NA      | NA     | NA        | NA       |
| 16  | 84503489   | 84503489 | O  | ADD  | 7309  | NA     | NA      | NA      | NA     | NA        | NA       |
| 16  | rs925994   | 84503518 | A  | ADD  | 7340  | 1.253  | 0.09269 | 1.044   | 1.502  | 2.429     | 0.01514  |
| 16  | rs12923978 | 84503825 | C  | ADD  | 7242  | 1.126  | 0.04353 | 1.034   | 1.226  | 2.718     | 0.006573 |
| 16  | rs424971   | 84503951 | C  | ADD  | 7300  | 1.009  | 0.03512 | 0.9417  | 1.081  | 0.2493    | 0.8031   |
| 16  | rs11649318 | 84503982 | C  | ADD  | 7351  | 1.016  | 0.03569 | 0.9476  | 1.09   | 0.4514    | 0.6517   |
| 16  | rs11863590 | 84503995 | G  | ADD  | 7248  | 1.127  | 0.0435  | 1.035   | 1.227  | 2.749     | 0.005984 |
| 16  | 84504494   | 84504494 | O  | ADD  | 7346  | NA     | NA      | NA      | NA     | NA        | NA       |
| 16  | 84504502   | 84504502 | O  | ADD  | 7359  | NA     | NA      | NA      | NA     | NA        | NA       |
| 16  | 84504605   | 84504605 | C  | ADD  | 7007  | 0.9344 | 0.05948 | 0.8316  | 1.05   | -1.141    | 0.2538   |
| 16  | 84504608   | 84504608 | T  | ADD  | 7358  | 1.247  | 0.5988  | 0.3858  | 4.033  | 0.3692    | 0.712    |
| 16  | 84504790   | 84504790 | O  | ADD  | 7367  | NA     | NA      | NA      | NA     | NA        | NA       |
| 16  | rs8051462  | 84504828 | G  | ADD  | 7339  | 1.01   | 0.03497 | 0.943   | 1.082  | 0.2825    | 0.7775   |
| 16  | rs8064111  | 84504976 | T  | ADD  | 7243  | 0.9233 | 0.0549  | 0.8291  | 1.028  | -1.453    | 0.1462   |
| 16  | rs8047999  | 84505028 | C  | ADD  | 7351  | 1.005  | 0.03493 | 0.9386  | 1.076  | 0.1468    | 0.8833   |
| 16  | 84505065   | 84505065 | C  | ADD  | 7339  | 0.4927 | 1.304   | 0.03827 | 6.344  | -0.5429   | 0.5872   |
| 16  | 84505099   | 84505099 | O  | ADD  | 7367  | NA     | NA      | NA      | NA     | NA        | NA       |
| 16  | 84505252   | 84505252 | A  | ADD  | 7218  | 1.147  | 0.1866  | 0.7958  | 1.654  | 0.7362    | 0.4616   |
| 16  | rs903202   | 84505280 | C  | ADD  | 7252  | 0.9994 | 0.03512 | 0.9329  | 1.071  | -0.01726  | 0.9862   |
| 16  | rs13331970 | 84505479 | A  | ADD  | 7338  | 1      | 0.3772  | 0.4774  | 2.094  | -8.02E-05 | 0.9999   |

| CHR | SNP        | BP       | A1 | TEST | NMISS | OR     | SE      | L95     | U95    | STAT     | P        |
|-----|------------|----------|----|------|-------|--------|---------|---------|--------|----------|----------|
| 16  | rs17444416 | 84505599 | A  | ADD  | 7356  | 0.9655 | 0.07374 | 0.8355  | 1.116  | -0.4768  | 0.6335   |
| 16  | 84505753   | 84505753 | G  | ADD  | 7350  | 1.117  | 0.6087  | 0.3387  | 3.682  | 0.1815   | 0.856    |
| 16  | rs11649271 | 84505830 | C  | ADD  | 7310  | 0.8969 | 0.05316 | 0.8082  | 0.9954 | -2.047   | 0.04068  |
| 16  | 84505980   | 84505980 | O  | ADD  | 7365  | NA     | NA      | NA      | NA     | NA       | NA       |
| 16  | rs903203   | 84506142 | A  | ADD  | 6992  | 1.06   | 0.0387  | 0.9829  | 1.144  | 1.513    | 0.1302   |
| 16  | 84506417   | 84506417 | T  | ADD  | 7357  | 1.114  | 0.6089  | 0.3377  | 3.673  | 0.177    | 0.8595   |
| 16  | rs403038   | 84506572 | A  | ADD  | 7359  | 0.8934 | 0.05224 | 0.8064  | 0.9897 | -2.158   | 0.03089  |
| 16  | rs8054513  | 84506608 | G  | ADD  | 7344  | 0.8943 | 0.05287 | 0.8063  | 0.992  | -2.112   | 0.03468  |
| 16  | rs8059127  | 84506690 | A  | ADD  | 7348  | 1.048  | 0.3382  | 0.54    | 2.033  | 0.1384   | 0.8899   |
| 16  | rs62052557 | 84506707 | A  | ADD  | 6891  | 0.7169 | 0.4379  | 0.3039  | 1.691  | -0.7601  | 0.4472   |
| 16  | rs305071   | 84506772 | A  | ADD  | 7072  | 0.892  | 0.05613 | 0.7991  | 0.9957 | -2.036   | 0.04173  |
| 16  | rs28552575 | 84506805 | T  | ADD  | 7349  | 0.8094 | 0.4066  | 0.3648  | 1.796  | -0.5202  | 0.603    |
| 16  | 84506880   | 84506880 | C  | ADD  | 7314  | 1.086  | 0.2382  | 0.681   | 1.732  | 0.3469   | 0.7286   |
| 16  | rs305070   | 84506925 | G  | ADD  | 7355  | 0.8993 | 0.05113 | 0.8136  | 0.9941 | -2.075   | 0.03796  |
| 16  | rs9928776  | 84506960 | T  | ADD  | 7347  | 0.9168 | 0.401   | 0.4178  | 2.012  | -0.2165  | 0.8286   |
| 16  | rs16939967 | 84506974 | T  | ADD  | 7359  | 1.077  | 0.04663 | 0.9827  | 1.18   | 1.586    | 0.1126   |
| 16  | rs305069   | 84507059 | C  | ADD  | 7200  | 1.005  | 0.03528 | 0.9382  | 1.077  | 0.1516   | 0.8795   |
| 16  | rs35819447 | 84507211 | G  | ADD  | 7064  | 1.518  | 1.07    | 0.1863  | 12.36  | 0.3897   | 0.6968   |
| 16  | 84507230   | 84507230 | O  | ADD  | 7367  | NA     | NA      | NA      | NA     | NA       | NA       |
| 16  | rs305068   | 84507397 | G  | ADD  | 7311  | 0.8946 | 0.05298 | 0.8063  | 0.9924 | -2.103   | 0.03544  |
| 16  | rs16939969 | 84507645 | C  | ADD  | 7354  | 0.8451 | 0.3135  | 0.4572  | 1.562  | -0.5368  | 0.5914   |
| 16  | rs28631400 | 84507948 | T  | ADD  | 7353  | 0.7126 | 0.3768  | 0.3405  | 1.491  | -0.8992  | 0.3686   |
| 16  | rs28407896 | 84507957 | T  | ADD  | 7353  | 0.7126 | 0.3768  | 0.3405  | 1.491  | -0.8992  | 0.3686   |
| 16  | 84508024   | 84508024 | O  | ADD  | 7367  | NA     | NA      | NA      | NA     | NA       | NA       |
| 16  | rs11117415 | 84508187 | G  | ADD  | 7353  | 1.211  | 0.07533 | 1.044   | 1.403  | 2.537    | 0.01117  |
| 16  | 84508204   | 84508204 | O  | ADD  | 7365  | NA     | NA      | NA      | NA     | NA       | NA       |
| 16  | rs4843860  | 84508422 | G  | ADD  | 7333  | 1.009  | 0.03913 | 0.9349  | 1.09   | 0.2404   | 0.81     |
| 16  | rs4843861  | 84508477 | T  | ADD  | 7358  | 1.007  | 0.03901 | 0.9332  | 1.087  | 0.1869   | 0.8517   |
| 16  | rs9926067  | 84508696 | G  | ADD  | 7358  | 0.753  | 0.3288  | 0.3952  | 1.434  | -0.8628  | 0.3883   |
| 16  | rs12926854 | 84508759 | G  | ADD  | 7322  | 1.008  | 0.03911 | 0.9333  | 1.088  | 0.1937   | 0.8464   |
| 16  | rs8054065  | 84508855 | A  | ADD  | 7272  | 1.025  | 0.03496 | 0.9569  | 1.097  | 0.7008   | 0.4834   |
| 16  | 84508893   | 84508893 | O  | ADD  | 7231  | NA     | NA      | NA      | NA     | NA       | NA       |
| 16  | rs8046526  | 84509136 | T  | ADD  | 7353  | 0.8679 | 0.05031 | 0.7864  | 0.9579 | -2.816   | 0.004866 |
| 16  | rs9934699  | 84509137 | A  | ADD  | 7307  | 1.195  | 0.06723 | 1.048   | 1.363  | 2.652    | 0.008007 |
| 16  | rs9934701  | 84509148 | A  | ADD  | 7307  | 1.195  | 0.06723 | 1.048   | 1.363  | 2.652    | 0.008007 |
| 16  | rs9926411  | 84509158 | G  | ADD  | 7360  | 1.187  | 0.1264  | 0.9266  | 1.521  | 1.357    | 0.1748   |
| 16  | rs8058904  | 84509183 | G  | ADD  | 7342  | 0.8702 | 0.05041 | 0.7883  | 0.9605 | -2.759   | 0.005793 |
| 16  | rs9924484  | 84509239 | G  | ADD  | 7312  | 1.206  | 0.06717 | 1.058   | 1.376  | 2.794    | 0.005213 |
| 16  | rs9924488  | 84509249 | G  | ADD  | 7315  | 1.007  | 0.039   | 0.9329  | 1.087  | 0.1792   | 0.8578   |
| 16  | rs8064189  | 84509297 | G  | ADD  | 7247  | 0.9649 | 0.04264 | 0.8875  | 1.049  | -0.8385  | 0.4018   |
| 16  | 84509524   | 84509524 | O  | ADD  | 6652  | NA     | NA      | NA      | NA     | NA       | NA       |
| 16  | 84509646   | 84509646 | O  | ADD  | 7186  | NA     | NA      | NA      | NA     | NA       | NA       |
| 16  | rs28368114 | 84509781 | A  | ADD  | 7103  | 0.7637 | 0.5712  | 0.2493  | 2.339  | -0.4721  | 0.6369   |
| 16  | rs61995933 | 84509816 | T  | ADD  | 7310  | 2.692  | 1.269   | 0.2237  | 32.41  | 0.7802   | 0.4353   |
| 16  | 84510111   | 84510111 | O  | ADD  | 7367  | NA     | NA      | NA      | NA     | NA       | NA       |
| 16  | 84510173   | 84510173 | C  | ADD  | 7214  | 0.5693 | 1.415   | 0.03552 | 9.125  | -0.398   | 0.6907   |
| 16  | rs2280378  | 84510246 | G  | ADD  | 7325  | 1      | 0.0347  | 0.9343  | 1.07   | 0.003001 | 0.9976   |
| 16  | rs7185022  | 84510430 | A  | ADD  | 7299  | 0.9957 | 0.03508 | 0.9295  | 1.067  | -0.1234  | 0.9018   |
| 16  | rs13338943 | 84510452 | T  | ADD  | 7366  | 0.9307 | 0.05371 | 0.8377  | 1.034  | -1.337   | 0.1812   |
| 16  | rs12929551 | 84510511 | T  | ADD  | 7354  | 1.062  | 0.04642 | 0.9693  | 1.163  | 1.287    | 0.198    |
| 16  | 84510613   | 84510613 | T  | ADD  | 7346  | 4.537  | 0.8104  | 0.9268  | 22.21  | 1.866    | 0.06202  |
| 16  | rs16939994 | 84510669 | G  | ADD  | 7346  | 1.155  | 0.1312  | 0.8933  | 1.494  | 1.1      | 0.2712   |
| 16  | rs8057456  | 84510697 | T  | ADD  | 7153  | 1.037  | 0.03617 | 0.9656  | 1.113  | 0.9915   | 0.3214   |

| CHR | SNP        | BP       | A1 | TEST | NMISS | OR       | SE       | L95    | U95   | STAT       | P       |
|-----|------------|----------|----|------|-------|----------|----------|--------|-------|------------|---------|
| 16  | 84510714   | 84510714 | C  | ADD  | 7306  | 2.21E-09 | 2.44E+04 | 0      | inf   | -0.0008176 | 0.9993  |
| 16  | 84510896   | 84510896 | A  | ADD  | 7008  | 0.9403   | 0.1334   | 0.7239 | 1.221 | -0.4618    | 0.6442  |
| 16  | 84510938   | 84510938 | O  | ADD  | 7336  | NA       | NA       | NA     | NA    | NA         | NA      |
| 16  | rs9927932  | 84510947 | T  | ADD  | 7366  | 1.44     | 0.37     | 0.6971 | 2.974 | 0.985      | 0.3246  |
| 16  | rs11866752 | 84510994 | T  | ADD  | 7357  | 2.096    | 0.4865   | 0.8077 | 5.438 | 1.521      | 0.1283  |
| 16  | rs28368115 | 84511122 | T  | ADD  | 7335  | 1.109    | 0.1348   | 0.8511 | 1.444 | 0.764      | 0.4449  |
| 16  | rs16940005 | 84511183 | C  | ADD  | 7308  | 1.08     | 0.04683  | 0.985  | 1.183 | 1.637      | 0.1017  |
| 16  | 84511331   | 84511331 | O  | ADD  | 7367  | NA       | NA       | NA     | NA    | NA         | NA      |
| 16  | rs35593615 | 84511410 | G  | ADD  | 7336  | 1.071    | 0.04649  | 0.9782 | 1.174 | 1.485      | 0.1376  |
| 16  | rs3751712  | 84511456 | C  | ADD  | 6690  | 0.9949   | 0.03717  | 0.925  | 1.07  | -0.1384    | 0.8899  |
| 16  | 84511483   | 84511483 | A  | ADD  | 5839  | 0.9277   | 0.2242   | 0.5979 | 1.44  | -0.3346    | 0.7379  |
| 16  | rs4843321  | 84511577 | C  | ADD  | 7180  | 1.012    | 0.03614  | 0.9429 | 1.086 | 0.3338     | 0.7386  |
| 16  | 84511720   | 84511720 | G  | ADD  | 7363  | 8.003    | 1.112    | 0.9058 | 70.7  | 1.871      | 0.06135 |
| 16  | rs16940007 | 84511788 | T  | ADD  | 7362  | 3.77E-10 | 2.44E+04 | 0      | inf   | -0.0008901 | 0.9993  |
| 16  | rs16940009 | 84512089 | C  | ADD  | 7364  | 1.848    | 0.4983   | 0.6961 | 4.909 | 1.233      | 0.2176  |
| 16  | 84512224   | 84512224 | T  | ADD  | 7365  | 1.20E+09 | 2.44E+04 | 0      | inf   | 0.0008576  | 0.9993  |
| 16  | rs2270503  | 84512302 | A  | ADD  | 7357  | 0.6452   | 0.9246   | 0.1053 | 3.951 | -0.4739    | 0.6355  |
| 16  | 84512462   | 84512462 | O  | ADD  | 7360  | NA       | NA       | NA     | NA    | NA         | NA      |
| 16  | 84512553   | 84512553 | O  | ADD  | 7365  | NA       | NA       | NA     | NA    | NA         | NA      |
| 16  | 84512648   | 84512648 | A  | ADD  | 7361  | 3.675    | 1.368    | 0.2518 | 53.63 | 0.9516     | 0.3413  |
| 16  | rs28368116 | 84512695 | C  | ADD  | 7307  | 0.7543   | 0.2647   | 0.449  | 1.267 | -1.065     | 0.2868  |
| 16  | rs10514611 | 84512743 | T  | ADD  | 7307  | 0.9592   | 0.04378  | 0.8803 | 1.045 | -0.952     | 0.3411  |
| 16  | rs1568391  | 84512805 | G  | ADD  | 7069  | 1.01     | 0.03565  | 0.9416 | 1.083 | 0.273      | 0.7848  |
| 16  | rs305072   | 84513164 | G  | ADD  | 7351  | 1.059    | 0.1268   | 0.8261 | 1.358 | 0.4528     | 0.6507  |
| 16  | rs1044873  | 84513172 | A  | ADD  | 7222  | 1.011    | 0.03614  | 0.9419 | 1.085 | 0.3023     | 0.7624  |
| 16  | 84513230   | 84513230 | A  | ADD  | 7020  | 1.008    | 0.03572  | 0.9399 | 1.081 | 0.2258     | 0.8214  |
| 16  | 84513410   | 84513410 | G  | ADD  | 7356  | 0.6454   | 0.9246   | 0.1054 | 3.952 | -0.4736    | 0.6358  |
| 16  | rs28368119 | 84513449 | T  | ADD  | 7096  | 0.694    | 0.2174   | 0.4532 | 1.063 | -1.681     | 0.09282 |
| 16  | 84513495   | 84513495 | O  | ADD  | 7367  | NA       | NA       | NA     | NA    | NA         | NA      |
| 16  | rs6638     | 84513545 | A  | ADD  | 7016  | 1.014    | 0.0357   | 0.9459 | 1.088 | 0.4032     | 0.6868  |
| 16  | 84513863   | 84513863 | C  | ADD  | 2107  | 0.9902   | 0.06981  | 0.8636 | 1.135 | -0.1407    | 0.8881  |
| 16  | rs11646027 | 84513898 | C  | ADD  | 7338  | 0.9623   | 0.04329  | 0.884  | 1.048 | -0.8879    | 0.3746  |
| 16  | rs28368120 | 84514144 | T  | ADD  | 7353  | 1.125    | 0.1282   | 0.8753 | 1.447 | 0.9215     | 0.3568  |
| 16  | 84514396   | 84514396 | C  | ADD  | 6962  | 1.409    | 0.2038   | 0.9447 | 2.101 | 1.681      | 0.09274 |
| 16  | rs7204286  | 84514422 | T  | ADD  | 7221  | 0.9641   | 0.04358  | 0.8852 | 1.05  | -0.839     | 0.4014  |
| 16  | rs1021479  | 84514915 | C  | ADD  | 7348  | 1.139    | 0.1258   | 0.8901 | 1.458 | 1.035      | 0.3008  |
| 16  | 84514923   | 84514923 | O  | ADD  | 7358  | NA       | NA       | NA     | NA    | NA         | NA      |
| 16  | rs305073   | 84515294 | T  | ADD  | 7256  | 1.032    | 0.03581  | 0.9618 | 1.107 | 0.8716     | 0.3834  |
| 16  | rs305074   | 84515321 | C  | ADD  | 7260  | 1.03     | 0.03559  | 0.961  | 1.105 | 0.8436     | 0.3989  |
| 16  | rs9932835  | 84515425 | G  | ADD  | 7332  | 0.9683   | 0.0433   | 0.8895 | 1.054 | -0.7435    | 0.4572  |
| 16  | rs11117416 | 84515825 | G  | ADD  | 7365  | 0.9651   | 0.04322  | 0.8868 | 1.05  | -0.8206    | 0.4118  |
| 16  | 84516049   | 84516049 | O  | ADD  | 7258  | NA       | NA       | NA     | NA    | NA         | NA      |
| 16  | 84516201   | 84516201 | T  | ADD  | 7366  | 1.96E-09 | 2.44E+04 | 0      | inf   | -0.0008225 | 0.9993  |
| 16  | rs16940023 | 84516215 | T  | ADD  | 7351  | 1.137    | 0.1253   | 0.8895 | 1.454 | 1.025      | 0.3052  |
| 16  | rs8052521  | 84516230 | A  | ADD  | 7355  | 0.9791   | 0.04196  | 0.9018 | 1.063 | -0.5042    | 0.6141  |
| 16  | rs1021480  | 84516471 | G  | ADD  | 7280  | 0.9889   | 0.0422   | 0.9104 | 1.074 | -0.2635    | 0.7921  |
| 16  | rs1021481  | 84516521 | A  | ADD  | 7353  | 0.9831   | 0.04201  | 0.9054 | 1.068 | -0.4045    | 0.6858  |
| 16  | rs880364   | 84516666 | G  | ADD  | 7360  | 0.9851   | 0.04196  | 0.9073 | 1.07  | -0.3582    | 0.7202  |
| 16  | rs880365   | 84516863 | T  | ADD  | 7363  | 0.9789   | 0.04206  | 0.9015 | 1.063 | -0.5067    | 0.6124  |
| 16  | rs880366   | 84516939 | C  | ADD  | 7362  | 0.9829   | 0.04197  | 0.9053 | 1.067 | -0.4117    | 0.6806  |
| 16  | 84517038   | 84517038 | O  | ADD  | 7345  | NA       | NA       | NA     | NA    | NA         | NA      |
| 16  | 84517061   | 84517061 | O  | ADD  | 7340  | NA       | NA       | NA     | NA    | NA         | NA      |
| 16  | 84517099   | 84517099 | O  | ADD  | 7367  | NA       | NA       | NA     | NA    | NA         | NA      |

| CHR | SNP        | BP       | A1 | TEST | NMISS | OR       | SE       | L95     | U95   | STAT      | P        |
|-----|------------|----------|----|------|-------|----------|----------|---------|-------|-----------|----------|
| 16  | rs305075   | 84517136 | T  | ADD  | 7353  | 1.013    | 0.03511  | 0.9455  | 1.085 | 0.3642    | 0.7157   |
| 16  | 84517710   | 84517710 | O  | ADD  | 7363  | NA       | NA       | NA      | NA    | NA        | NA       |
| 16  | rs11644411 | 84517732 | C  | ADD  | 7288  | 0.9672   | 0.04344  | 0.8883  | 1.053 | -0.7676   | 0.4427   |
| 16  | rs11648480 | 84517780 | T  | ADD  | 7306  | 0.9683   | 0.04343  | 0.8893  | 1.054 | -0.7409   | 0.4588   |
| 16  | 84517870   | 84517870 | A  | ADD  | 7159  | 1.21     | 0.1327   | 0.9327  | 1.569 | 1.435     | 0.1514   |
| 16  | 84517901   | 84517901 | C  | ADD  | 7353  | 0.5404   | 0.5687   | 0.1773  | 1.647 | -1.082    | 0.2791   |
| 16  | rs1472235  | 84518468 | A  | ADD  | 7209  | 0.9612   | 0.03875  | 0.8909  | 1.037 | -1.021    | 0.3075   |
| 16  | 84518535   | 84518535 | T  | ADD  | 6911  | 0.6778   | 0.5084   | 0.2502  | 1.836 | -0.7648   | 0.4444   |
| 16  | rs1038953  | 84518591 | A  | ADD  | 6820  | 1.396    | 0.26     | 0.8386  | 2.323 | 1.283     | 0.1995   |
| 16  | 84518682   | 84518682 | A  | ADD  | 7292  | 1.483    | 0.504    | 0.5524  | 3.984 | 0.7825    | 0.4339   |
| 16  | 84518866   | 84518866 | C  | ADD  | 7287  | 1.459    | 0.9743   | 0.2162  | 9.848 | 0.3878    | 0.6982   |
| 16  | rs4843862  | 84518960 | G  | ADD  | 5539  | 1.007    | 0.04091  | 0.929   | 1.091 | 0.159     | 0.8737   |
| 16  | rs17444745 | 84519063 | A  | ADD  | 7362  | 0.9367   | 0.04689  | 0.8544  | 1.027 | -1.396    | 0.1628   |
| 16  | 84519295   | 84519295 | T  | ADD  | 7364  | 8.008    | 1.112    | 0.9064  | 70.75 | 1.872     | 0.06126  |
| 16  | 84519403   | 84519403 | G  | ADD  | 7290  | 1.077    | 0.3264   | 0.5683  | 2.043 | 0.2284    | 0.8193   |
| 16  | 84519498   | 84519498 | G  | ADD  | 7357  | 0.5302   | 0.8918   | 0.09232 | 3.045 | -0.7115   | 0.4768   |
| 16  | 84519800   | 84519800 | C  | ADD  | 7347  | 2.089    | 0.8582   | 0.3885  | 11.23 | 0.8582    | 0.3908   |
| 16  | rs305076   | 84519862 | C  | ADD  | 7344  | 6.064    | 1.154    | 0.6317  | 58.22 | 1.562     | 0.1183   |
| 16  | 84520081   | 84520081 | O  | ADD  | 7355  | NA       | NA       | NA      | NA    | NA        | NA       |
| 16  | 84520237   | 84520237 | C  | ADD  | 7357  | 1.702    | 1.157    | 0.1764  | 16.42 | 0.4598    | 0.6456   |
| 16  | 84520351   | 84520351 | C  | ADD  | 6578  | 1.082    | 0.09648  | 0.896   | 1.308 | 0.8217    | 0.4113   |
| 16  | 84520516   | 84520516 | A  | ADD  | 6561  | 1.083    | 0.09551  | 0.8978  | 1.305 | 0.8308    | 0.4061   |
| 16  | 84520518   | 84520518 | O  | ADD  | 7360  | NA       | NA       | NA      | NA    | NA        | NA       |
| 16  | 84520604   | 84520604 | O  | ADD  | 7367  | NA       | NA       | NA      | NA    | NA        | NA       |
| 16  | 84521376   | 84521376 | T  | ADD  | 7029  | 1.748    | 0.2905   | 0.9888  | 3.089 | 1.921     | 0.05469  |
| 16  | 84521433   | 84521433 | O  | ADD  | 7367  | NA       | NA       | NA      | NA    | NA        | NA       |
| 16  | 84521580   | 84521580 | G  | ADD  | 7337  | 4.869    | 0.8019   | 1.011   | 23.44 | 1.974     | 0.04838  |
| 16  | 84521632   | 84521632 | T  | ADD  | 7268  | 0.6387   | 1.223    | 0.05812 | 7.02  | -0.3665   | 0.714    |
| 16  | 84521737   | 84521737 | O  | ADD  | 7367  | NA       | NA       | NA      | NA    | NA        | NA       |
| 16  | rs12598785 | 84521809 | G  | ADD  | 7311  | 0.9401   | 0.05205  | 0.8489  | 1.041 | -1.187    | 0.2354   |
| 16  | rs60218704 | 84521854 | C  | ADD  | 7342  | 8.038    | 1.112    | 0.9092  | 71.07 | 1.874     | 0.06088  |
| 16  | rs8045988  | 84521891 | A  | ADD  | 7363  | 1.191    | 0.06549  | 1.048   | 1.354 | 2.671     | 0.007557 |
| 16  | rs366078   | 84522064 | C  | ADD  | 7348  | 1.027    | 0.07754  | 0.8826  | 1.196 | 0.3496    | 0.7266   |
| 16  | rs2172625  | 84522286 | C  | ADD  | 7208  | 0.9925   | 0.0782   | 0.8515  | 1.157 | -0.09569  | 0.9238   |
| 16  | rs2970094  | 84522327 | A  | ADD  | 6832  | 0.9691   | 0.0733   | 0.8394  | 1.119 | -0.4284   | 0.6684   |
| 16  | 84522420   | 84522420 | A  | ADD  | 7299  | 0.6899   | 1.422    | 0.04251 | 11.2  | -0.2611   | 0.794    |
| 16  | 84522462   | 84522462 | O  | ADD  | 7356  | NA       | NA       | NA      | NA    | NA        | NA       |
| 16  | rs399280   | 84522499 | G  | ADD  | 7215  | 1.077    | 0.07649  | 0.9273  | 1.252 | 0.9736    | 0.3303   |
| 16  | rs383425   | 84522540 | T  | ADD  | 7347  | 1.029    | 0.03752  | 0.9559  | 1.107 | 0.757     | 0.4491   |
| 16  | 84522577   | 84522577 | C  | ADD  | 7339  | 1.051    | 0.07682  | 0.9045  | 1.222 | 0.6537    | 0.5133   |
| 16  | 84522585   | 84522585 | C  | ADD  | 7104  | 2.048    | 0.3688   | 0.9939  | 4.219 | 1.943     | 0.05196  |
| 16  | rs56200928 | 84522852 | C  | ADD  | 7054  | 1.581    | 0.1872   | 1.095   | 2.282 | 2.447     | 0.0144   |
| 16  | 84522867   | 84522867 | O  | ADD  | 7367  | NA       | NA       | NA      | NA    | NA        | NA       |
| 16  | 84522980   | 84522980 | A  | ADD  | 7354  | 1.549    | 1.556    | 0.07329 | 32.72 | 0.281     | 0.7787   |
| 16  | rs523642   | 84523096 | A  | ADD  | 7326  | 1.062    | 0.07766  | 0.9124  | 1.237 | 0.7794    | 0.4357   |
| 16  | rs524432   | 84523155 | C  | ADD  | 7364  | 1.065    | 0.07605  | 0.9179  | 1.237 | 0.8336    | 0.4045   |
| 16  | 84523165   | 84523165 | A  | ADD  | 7357  | 0.7633   | 0.2867   | 0.4351  | 1.339 | -0.9419   | 0.3462   |
| 16  | 84523216   | 84523216 | T  | ADD  | 7352  | 4.18E+09 | 2.44E+04 | 0       | inf   | 0.0009087 | 0.9993   |
| 16  | rs388988   | 84523302 | T  | ADD  | 7304  | 1.041    | 0.07599  | 0.8967  | 1.208 | 0.5259    | 0.599    |
| 16  | 84523320   | 84523320 | O  | ADD  | 7360  | NA       | NA       | NA      | NA    | NA        | NA       |
| 16  | rs73266819 | 84523372 | C  | ADD  | 7360  | 0.9575   | 0.7936   | 0.2021  | 4.536 | -0.05475  | 0.9563   |
| 16  | 84523433   | 84523433 | C  | ADD  | 7109  | 1.029    | 0.08087  | 0.8785  | 1.206 | 0.3588    | 0.7198   |
| 16  | rs411221   | 84523460 | C  | ADD  | 7195  | 1.039    | 0.07755  | 0.8922  | 1.209 | 0.4889    | 0.6249   |

| CHR | SNP        | BP       | A1 | TEST | NMISS | OR       | SE       | L95    | U95    | STAT       | P         |
|-----|------------|----------|----|------|-------|----------|----------|--------|--------|------------|-----------|
| 16  | 84523472   | 84523472 | 0  | ADD  | 7367  | NA       | NA       | NA     | NA     | NA         | NA        |
| 16  | 84523510   | 84523510 | 0  | ADD  | 7358  | NA       | NA       | NA     | NA     | NA         | NA        |
| 16  | rs878453   | 84523664 | C  | ADD  | 7096  | 0.9785   | 0.0362   | 0.9115 | 1.05   | -0.5995    | 0.5488    |
| 16  | rs878454   | 84523673 | A  | ADD  | 7330  | 1.017    | 0.04026  | 0.9399 | 1.101  | 0.4191     | 0.6752    |
| 16  | rs903201   | 84523785 | C  | ADD  | 7278  | 0.927    | 0.05324  | 0.8352 | 1.029  | -1.423     | 0.1547    |
| 16  | rs11861479 | 84523794 | G  | ADD  | 7280  | 0.9265   | 0.05324  | 0.8347 | 1.028  | -1.435     | 0.1513    |
| 16  | rs11117417 | 84523830 | T  | ADD  | 7281  | 0.9306   | 0.05326  | 0.8383 | 1.033  | -1.351     | 0.1767    |
| 16  | rs58980382 | 84523934 | T  | ADD  | 7090  | 0.9653   | 0.08558  | 0.8163 | 1.142  | -0.4126    | 0.6799    |
| 16  | rs11860480 | 84523959 | C  | ADD  | 7350  | 0.9512   | 0.04323  | 0.874  | 1.035  | -1.157     | 0.2475    |
| 16  | rs11860517 | 84524000 | G  | ADD  | 7346  | 0.9357   | 0.05273  | 0.8438 | 1.038  | -1.261     | 0.2072    |
| 16  | rs11117418 | 84524028 | G  | ADD  | 7343  | 0.939    | 0.04943  | 0.8523 | 1.035  | -1.274     | 0.2028    |
| 16  | rs12051539 | 84524038 | G  | ADD  | 7242  | 1.086    | 0.1516   | 0.8069 | 1.462  | 0.5442     | 0.5863    |
| 16  | 84524043   | 84524043 | A  | ADD  | 7152  | 1.045    | 0.1238   | 0.8201 | 1.332  | 0.358      | 0.7204    |
| 16  | 84524049   | 84524049 | G  | ADD  | 7213  | 0.9666   | 0.08511  | 0.8181 | 1.142  | -0.3988    | 0.69      |
| 16  | 84524139   | 84524139 | 0  | ADD  | 7355  | NA       | NA       | NA     | NA     | NA         | NA        |
| 16  | rs13332649 | 84524184 | G  | ADD  | 7124  | 0.9399   | 0.1273   | 0.7323 | 1.206  | -0.487     | 0.6262    |
| 16  | rs875529   | 84524187 | C  | ADD  | 7329  | 0.9299   | 0.05288  | 0.8384 | 1.031  | -1.375     | 0.1693    |
| 16  | rs875528   | 84524211 | A  | ADD  | 7241  | 1.138    | 0.1493   | 0.8492 | 1.525  | 0.8657     | 0.3867    |
| 16  | 84524220   | 84524220 | T  | ADD  | 7242  | 0.9678   | 0.188    | 0.6695 | 1.399  | -0.174     | 0.8618    |
| 16  | rs875527   | 84524231 | A  | ADD  | 7363  | 1.165    | 0.1497   | 0.8687 | 1.562  | 1.02       | 0.3079    |
| 16  | rs419030   | 84524302 | A  | ADD  | 7216  | 1.1      | 0.04025  | 1.016  | 1.19   | 2.359      | 0.01833   |
| 16  | 84524389   | 84524389 | 0  | ADD  | 7366  | NA       | NA       | NA     | NA     | NA         | NA        |
| 16  | 84524454   | 84524454 | C  | ADD  | 7041  | 0.5961   | 0.8194   | 0.1196 | 2.971  | -0.6313    | 0.5278    |
| 16  | 84524516   | 84524516 | C  | ADD  | 7357  | 1.519    | 0.6199   | 0.4508 | 5.121  | 0.6748     | 0.4998    |
| 16  | rs12596341 | 84524541 | A  | ADD  | 7337  | 0.8966   | 0.05675  | 0.8022 | 1.002  | -1.923     | 0.0545    |
| 16  | rs7198271  | 84524586 | G  | ADD  | 7323  | 0.8788   | 0.5359   | 0.3074 | 2.512  | -0.2412    | 0.8094    |
| 16  | 84524664   | 84524664 | C  | ADD  | 6856  | 1.063    | 0.03987  | 0.9835 | 1.15   | 1.542      | 0.123     |
| 16  | 84524665   | 84524665 | C  | ADD  | 7195  | 1.062    | 0.03879  | 0.9846 | 1.146  | 1.56       | 0.1187    |
| 16  | 84524666   | 84524666 | C  | ADD  | 7195  | 1.062    | 0.03879  | 0.9846 | 1.146  | 1.56       | 0.1187    |
| 16  | 84524668   | 84524668 | C  | ADD  | 7163  | 1.064    | 0.03887  | 0.9856 | 1.148  | 1.587      | 0.1126    |
| 16  | 84524687   | 84524687 | C  | ADD  | 4208  | 0.7433   | 0.1372   | 0.5681 | 0.9726 | -2.162     | 0.0306    |
| 16  | 84524706   | 84524706 | C  | ADD  | 3249  | 0.8808   | 0.08954  | 0.7391 | 1.05   | -1.417     | 0.1565    |
| 16  | 84524707   | 84524707 | C  | ADD  | 2840  | 0.8568   | 0.1133   | 0.6862 | 1.07   | -1.364     | 0.1726    |
| 16  | 84524722   | 84524722 | C  | ADD  | 6047  | 1.043    | 0.221    | 0.676  | 1.608  | 0.1886     | 0.8504    |
| 16  | 84524723   | 84524723 | C  | ADD  | 6020  | 1.046    | 0.2209   | 0.6784 | 1.613  | 0.2034     | 0.8388    |
| 16  | 84524750   | 84524750 | T  | ADD  | 7096  | 0.792    | 0.1256   | 0.6192 | 1.013  | -1.856     | 0.06343   |
| 16  | rs12444221 | 84524786 | T  | ADD  | 7347  | 1.046    | 0.1662   | 0.7549 | 1.448  | 0.2684     | 0.7884    |
| 16  | 84524997   | 84524997 | 0  | ADD  | 7307  | NA       | NA       | NA     | NA     | NA         | NA        |
| 16  | rs437291   | 84525009 | C  | ADD  | 7311  | 1.072    | 0.0385   | 0.9941 | 1.156  | 1.806      | 0.07095   |
| 16  | 84525054   | 84525054 | 0  | ADD  | 7364  | NA       | NA       | NA     | NA     | NA         | NA        |
| 16  | 84525087   | 84525087 | T  | ADD  | 7041  | 1.613    | 0.3464   | 0.8179 | 3.18   | 1.38       | 0.1677    |
| 16  | rs9936079  | 84525095 | A  | ADD  | 6999  | 1.012    | 0.1617   | 0.7372 | 1.39   | 0.07467    | 0.9405    |
| 16  | rs385344   | 84525105 | G  | ADD  | 7325  | 1.121    | 0.04017  | 1.036  | 1.213  | 2.838      | 0.004535  |
| 16  | rs447632   | 84525141 | G  | ADD  | 7350  | 1.062    | 0.03842  | 0.9854 | 1.146  | 1.576      | 0.115     |
| 16  | rs34337659 | 84525158 | C  | ADD  | 7347  | 1.118    | 0.04007  | 1.034  | 1.21   | 2.795      | 0.005197  |
| 16  | rs66509440 | 84525182 | T  | ADD  | 6906  | 1.14     | 0.04252  | 1.049  | 1.239  | 3.082      | 0.002057  |
| 16  | rs66804793 | 84525190 | A  | ADD  | 6907  | 1.14     | 0.04252  | 1.049  | 1.239  | 3.087      | 0.002022  |
| 16  | rs9925859  | 84525223 | C  | ADD  | 7333  | 0.9319   | 0.03851  | 0.8641 | 1.005  | -1.832     | 0.06694   |
| 16  | rs74032085 | 84525245 | C  | ADD  | 6763  | 1.155    | 0.04328  | 1.061  | 1.258  | 3.334      | 0.0008548 |
| 16  | rs16940044 | 84525266 | G  | ADD  | 6743  | 1.157    | 0.04346  | 1.063  | 1.26   | 3.36       | 0.0007789 |
| 16  | 84525360   | 84525360 | G  | ADD  | 7216  | 4.81E-10 | 2.44E+04 | 0      | inf    | -0.0008801 | 0.9993    |
| 16  | rs2934497  | 84525379 | T  | ADD  | 6720  | 1.182    | 0.04387  | 1.085  | 1.289  | 3.821      | 0.000133  |
| 16  | rs2970091  | 84525387 | A  | ADD  | 6806  | 1.177    | 0.04338  | 1.081  | 1.281  | 3.754      | 0.0001738 |

| CHR | SNP        | BP       | A1 | TEST | NMISS | OR       | SE       | L95     | U95    | STAT       | P        |
|-----|------------|----------|----|------|-------|----------|----------|---------|--------|------------|----------|
| 16  | rs2970090  | 84525392 | A  | ADD  | 6796  | 1.107    | 0.04035  | 1.023   | 1.198  | 2.514      | 0.01193  |
| 16  | rs56239618 | 84525421 | G  | ADD  | 6774  | 1.066    | 0.04908  | 0.9685  | 1.174  | 1.307      | 0.1911   |
| 16  | rs57439018 | 84525761 | C  | ADD  | 7354  | 0.9568   | 0.7936   | 0.202   | 4.533  | -0.0556    | 0.9557   |
| 16  | 84525770   | 84525770 | A  | ADD  | 7362  | 1.23E+09 | 1.41E+04 | 0       | inf    | 0.001488   | 0.9988   |
| 16  | rs2934498  | 84525783 | G  | ADD  | 7355  | 1.122    | 0.04011  | 1.038   | 1.214  | 2.881      | 0.003965 |
| 16  | rs447919   | 84526058 | T  | ADD  | 7328  | 0.9332   | 0.03856  | 0.8653  | 1.006  | -1.793     | 0.073    |
| 16  | 84526080   | 84526080 | O  | ADD  | 7362  | NA       | NA       | NA      | NA     | NA         | NA       |
| 16  | 84526134   | 84526134 | O  | ADD  | 7355  | NA       | NA       | NA      | NA     | NA         | NA       |
| 16  | rs439885   | 84526175 | A  | ADD  | 7360  | 1.117    | 0.04009  | 1.033   | 1.208  | 2.762      | 0.005751 |
| 16  | rs10400953 | 84526344 | T  | ADD  | 7349  | 0.9391   | 0.05296  | 0.8465  | 1.042  | -1.186     | 0.2356   |
| 16  | 84526382   | 84526382 | T  | ADD  | 7355  | 7.20E-10 | 1.62E+04 | 0       | inf    | -0.001301  | 0.999    |
| 16  | rs450443   | 84526392 | G  | ADD  | 7332  | 1.123    | 0.04014  | 1.038   | 1.215  | 2.892      | 0.003833 |
| 16  | rs396987   | 84526435 | G  | ADD  | 7330  | 1.124    | 0.04015  | 1.039   | 1.216  | 2.906      | 0.003657 |
| 16  | rs385989   | 84526509 | G  | ADD  | 7285  | 1.071    | 0.03776  | 0.9945  | 1.153  | 1.813      | 0.06976  |
| 16  | 84526528   | 84526528 | A  | ADD  | 7294  | 0.9147   | 0.2803   | 0.528   | 1.585  | -0.318     | 0.7505   |
| 16  | rs4843865  | 84526806 | T  | ADD  | 7344  | 1.073    | 0.1632   | 0.7791  | 1.477  | 0.4306     | 0.6668   |
| 16  | 84527141   | 84527141 | C  | ADD  | 7355  | 1.05     | 0.1684   | 0.7548  | 1.46   | 0.2888     | 0.7727   |
| 16  | rs8052690  | 84527239 | G  | ADD  | 7361  | 1.098    | 0.1635   | 0.7967  | 1.512  | 0.5699     | 0.5687   |
| 16  | rs7185692  | 84527553 | G  | ADD  | 7341  | 0.9361   | 0.05305  | 0.8436  | 1.039  | -1.245     | 0.213    |
| 16  | 84527600   | 84527600 | C  | ADD  | 3049  | 1.096    | 0.07533  | 0.9459  | 1.271  | 1.222      | 0.2217   |
| 16  | 84527601   | 84527601 | A  | ADD  | 5802  | 0.8785   | 0.04298  | 0.8075  | 0.9557 | -3.014     | 0.002575 |
| 16  | 84527603   | 84527603 | C  | ADD  | 4195  | 1.094    | 0.05495  | 0.982   | 1.218  | 1.63       | 0.103    |
| 16  | 84527612   | 84527612 | C  | ADD  | 7051  | 3.168    | 0.407    | 1.427   | 7.034  | 2.833      | 0.004615 |
| 16  | 84527613   | 84527613 | T  | ADD  | 6722  | 2.099    | 0.3478   | 1.061   | 4.149  | 2.132      | 0.03305  |
| 16  | 84527727   | 84527727 | O  | ADD  | 7241  | NA       | NA       | NA      | NA     | NA         | NA       |
| 16  | 84527829   | 84527829 | C  | ADD  | 7251  | 1.216    | 0.5182   | 0.4403  | 3.356  | 0.3767     | 0.7064   |
| 16  | rs8059144  | 84527977 | C  | ADD  | 7323  | 0.9404   | 0.05126  | 0.8505  | 1.04   | -1.199     | 0.2306   |
| 16  | rs8045825  | 84527979 | G  | ADD  | 7327  | 0.9401   | 0.05126  | 0.8503  | 1.039  | -1.205     | 0.2283   |
| 16  | 84528014   | 84528014 | G  | ADD  | 7359  | 3.77E-10 | 2.44E+04 | 0       | inf    | -0.0008901 | 0.9993   |
| 16  | 84528020   | 84528020 | T  | ADD  | 7325  | 0.4731   | 0.6302   | 0.1376  | 1.627  | -1.188     | 0.2349   |
| 16  | rs4843866  | 84528151 | T  | ADD  | 7329  | 0.9374   | 0.05119  | 0.8479  | 1.036  | -1.264     | 0.2064   |
| 16  | rs4843867  | 84528219 | G  | ADD  | 7331  | 0.9377   | 0.05119  | 0.8482  | 1.037  | -1.257     | 0.2089   |
| 16  | 84528233   | 84528233 | A  | ADD  | 7360  | 0.1469   | 1.092    | 0.01729 | 1.249  | -1.757     | 0.07898  |
| 16  | rs186249   | 84528397 | C  | ADD  | 7176  | 1.122    | 0.04078  | 1.036   | 1.216  | 2.828      | 0.004678 |
| 16  | 84528620   | 84528620 | O  | ADD  | 7367  | NA       | NA       | NA      | NA     | NA         | NA       |
| 16  | 84528669   | 84528669 | O  | ADD  | 7346  | NA       | NA       | NA      | NA     | NA         | NA       |
| 16  | rs12149636 | 84528721 | G  | ADD  | 7337  | 0.9478   | 0.05278  | 0.8546  | 1.051  | -1.017     | 0.3093   |
| 16  | 84528857   | 84528857 | C  | ADD  | 7143  | 0.9582   | 0.05826  | 0.8548  | 1.074  | -0.7333    | 0.4634   |
| 16  | 84528860   | 84528860 | T  | ADD  | 6344  | NA       | NA       | NA      | NA     | NA         | NA       |
| 16  | rs12149642 | 84528922 | T  | ADD  | 7063  | 0.9401   | 0.06022  | 0.8354  | 1.058  | -1.026     | 0.3048   |
| 16  | 84529014   | 84529014 | G  | ADD  | 6967  | 0.7845   | 0.1382   | 0.5983  | 1.029  | -1.756     | 0.07909  |
| 16  | 84529016   | 84529016 | C  | ADD  | 3189  | 0.8758   | 0.08908  | 0.7355  | 1.043  | -1.488     | 0.1367   |
| 16  | 84529025   | 84529025 | C  | ADD  | 5457  | 1.162    | 0.1142   | 0.929   | 1.454  | 1.315      | 0.1884   |
| 16  | 84529026   | 84529026 | C  | ADD  | 5918  | 0.9831   | 0.1078   | 0.7958  | 1.214  | -0.158     | 0.8745   |
| 16  | 84529027   | 84529027 | C  | ADD  | 6508  | 0.929    | 0.06128  | 0.8238  | 1.048  | -1.202     | 0.2292   |
| 16  | 84529028   | 84529028 | C  | ADD  | 6372  | 0.9706   | 0.06045  | 0.8621  | 1.093  | -0.4937    | 0.6215   |
| 16  | 84529029   | 84529029 | C  | ADD  | 6670  | 0.9519   | 0.06004  | 0.8462  | 1.071  | -0.821     | 0.4117   |
| 16  | 84529030   | 84529030 | C  | ADD  | 6670  | 0.9519   | 0.06004  | 0.8462  | 1.071  | -0.821     | 0.4117   |
| 16  | 84529031   | 84529031 | C  | ADD  | 6370  | 0.93     | 0.06019  | 0.8265  | 1.046  | -1.205     | 0.2282   |
| 16  | rs12149223 | 84529032 | C  | ADD  | 5771  | 0.978    | 0.1281   | 0.7608  | 1.257  | -0.1733    | 0.8624   |
| 16  | 84529037   | 84529037 | C  | ADD  | 6938  | 0.958    | 0.2283   | 0.6124  | 1.499  | -0.1878    | 0.851    |
| 16  | 84529038   | 84529038 | C  | ADD  | 7000  | 1.213    | 0.3627   | 0.5959  | 2.47   | 0.5327     | 0.5942   |
| 16  | 84529220   | 84529220 | T  | ADD  | 7051  | 0.9634   | 0.1461   | 0.7235  | 1.283  | -0.2555    | 0.7983   |

| CHR | SNP        | BP       | A1 | TEST | NMISS | OR       | SE       | L95     | U95   | STAT      | P        |
|-----|------------|----------|----|------|-------|----------|----------|---------|-------|-----------|----------|
| 16  | 84529277   | 84529277 | 0  | ADD  | 7367  | NA       | NA       | NA      | NA    | NA        | NA       |
| 16  | rs305067   | 84529341 | C  | ADD  | 6725  | 0.9311   | 0.04087  | 0.8594  | 1.009 | -1.748    | 0.08047  |
| 16  | rs11117419 | 84529383 | G  | ADD  | 7340  | 0.9508   | 0.0586   | 0.8476  | 1.066 | -0.8615   | 0.3889   |
| 16  | rs11117420 | 84529423 | C  | ADD  | 7110  | 1.251    | 0.3022   | 0.692   | 2.262 | 0.7414    | 0.4584   |
| 16  | rs11117421 | 84529461 | A  | ADD  | 7342  | 0.9495   | 0.05858  | 0.8465  | 1.065 | -0.8846   | 0.3764   |
| 16  | rs11117422 | 84529514 | C  | ADD  | 7250  | NA       | NA       | NA      | NA    | NA        | NA       |
| 16  | 84529575   | 84529575 | 0  | ADD  | 7292  | NA       | NA       | NA      | NA    | NA        | NA       |
| 16  | rs11117423 | 84529682 | C  | ADD  | 7314  | 0.9517   | 0.05862  | 0.8484  | 1.068 | -0.8439   | 0.3987   |
| 16  | rs11117424 | 84529738 | G  | ADD  | 7360  | 0.9508   | 0.0585   | 0.8478  | 1.066 | -0.8627   | 0.3883   |
| 16  | rs11117425 | 84529772 | T  | ADD  | 7352  | 0.9526   | 0.05862  | 0.8492  | 1.069 | -0.8283   | 0.4075   |
| 16  | rs11648012 | 84529908 | T  | ADD  | 7358  | 0.9506   | 0.05847  | 0.8477  | 1.066 | -0.8662   | 0.3864   |
| 16  | 84530040   | 84530040 | T  | ADD  | 7352  | 0.7206   | 1.422    | 0.04435 | 11.71 | -0.2303   | 0.8179   |
| 16  | rs11643999 | 84530070 | A  | ADD  | 7359  | 0.9506   | 0.05848  | 0.8477  | 1.066 | -0.8666   | 0.3861   |
| 16  | rs11648084 | 84530099 | T  | ADD  | 7362  | 0.9535   | 0.05851  | 0.8502  | 1.069 | -0.8144   | 0.4154   |
| 16  | rs11644034 | 84530113 | A  | ADD  | 7313  | NA       | NA       | NA      | NA    | NA        | NA       |
| 16  | rs16940083 | 84530130 | T  | ADD  | 7359  | 0.7457   | 0.7659   | 0.1662  | 3.346 | -0.3831   | 0.7016   |
| 16  | 84530187   | 84530187 | 0  | ADD  | 7206  | NA       | NA       | NA      | NA    | NA        | NA       |
| 16  | rs305066   | 84530277 | T  | ADD  | 7299  | 1.118    | 0.03967  | 1.035   | 1.209 | 2.822     | 0.004777 |
| 16  | rs12600127 | 84530280 | G  | ADD  | 7322  | 0.943    | 0.05867  | 0.8405  | 1.058 | -1.001    | 0.3169   |
| 16  | rs13335265 | 84530311 | C  | ADD  | 6961  | 0.8337   | 0.2166   | 0.5453  | 1.275 | -0.8396   | 0.4012   |
| 16  | 84530325   | 84530325 | 0  | ADD  | 7308  | NA       | NA       | NA      | NA    | NA        | NA       |
| 16  | 84530431   | 84530431 | G  | ADD  | 7357  | 7.20E-10 | 1.62E+04 | 0       | inf   | -0.001301 | 0.999    |
| 16  | rs62051023 | 84530439 | T  | ADD  | 7331  | 1.147    | 0.1657   | 0.8292  | 1.588 | 0.8297    | 0.4067   |
| 16  | 84530468   | 84530468 | T  | ADD  | 7327  | 0.4988   | 1.315    | 0.03788 | 6.569 | -0.5288   | 0.597    |
| 16  | rs8062669  | 84530493 | T  | ADD  | 7352  | 0.9754   | 0.08822  | 0.8205  | 1.16  | -0.2821   | 0.7779   |
| 16  | rs12711490 | 84530529 | C  | ADD  | 7358  | NA       | NA       | NA      | NA    | NA        | NA       |
| 16  | 84530554   | 84530554 | C  | ADD  | 7359  | 2.169    | 0.7357   | 0.5128  | 9.172 | 1.052     | 0.2927   |
| 16  | rs12598434 | 84530560 | T  | ADD  | 7313  | 0.9514   | 0.05864  | 0.8481  | 1.067 | -0.8489   | 0.3959   |
| 16  | rs11641153 | 84530641 | G  | ADD  | 7342  | NA       | NA       | NA      | NA    | NA        | NA       |
| 16  | rs11641155 | 84530653 | G  | ADD  | 7341  | NA       | NA       | NA      | NA    | NA        | NA       |
| 16  | rs7205434  | 84530696 | G  | ADD  | 7341  | NA       | NA       | NA      | NA    | NA        | NA       |
| 16  | rs8050476  | 84530705 | G  | ADD  | 7365  | 0.9459   | 0.08625  | 0.7988  | 1.12  | -0.6448   | 0.5191   |
| 16  | rs4843868  | 84530902 | T  | ADD  | 7337  | NA       | NA       | NA      | NA    | NA        | NA       |
| 16  | 84530967   | 84530967 | T  | ADD  | 7342  | 0.9324   | 0.107    | 0.7559  | 1.15  | -0.6544   | 0.5128   |
| 16  | rs1879213  | 84530977 | T  | ADD  | 7350  | 0.9336   | 0.05888  | 0.8318  | 1.048 | -1.168    | 0.243    |
| 16  | rs56250418 | 84530999 | T  | ADD  | 7091  | 1.054    | 0.04575  | 0.9637  | 1.153 | 1.152     | 0.2494   |
| 16  | rs305065   | 84531367 | G  | ADD  | 7315  | 0.933    | 0.03856  | 0.8651  | 1.006 | -1.797    | 0.07229  |
| 16  | 84531390   | 84531390 | C  | ADD  | 7269  | 0.9495   | 0.271    | 0.5583  | 1.615 | -0.1911   | 0.8484   |
| 16  | rs305064   | 84531643 | T  | ADD  | 7303  | 0.9365   | 0.0387   | 0.8681  | 1.01  | -1.696    | 0.08989  |
| 16  | rs9927123  | 84531682 | G  | ADD  | 7328  | 0.946    | 0.05055  | 0.8568  | 1.045 | -1.098    | 0.2721   |
| 16  | rs16940087 | 84531752 | T  | ADD  | 7359  | 0.7457   | 0.7659   | 0.1662  | 3.346 | -0.3831   | 0.7016   |
| 16  | rs16940088 | 84531870 | T  | ADD  | 7347  | 0.9351   | 0.05893  | 0.8331  | 1.05  | -1.139    | 0.2546   |
| 16  | rs13330932 | 84532008 | T  | ADD  | 7275  | 0.9081   | 0.06337  | 0.802   | 1.028 | -1.521    | 0.1283   |
| 16  | 84532040   | 84532040 | T  | ADD  | 7328  | 0.4986   | 1.315    | 0.03786 | 6.567 | -0.5291   | 0.5967   |
| 16  | rs305063   | 84532158 | T  | ADD  | 7025  | 1.1      | 0.04027  | 1.016   | 1.19  | 2.365     | 0.01805  |
| 16  | 84532198   | 84532198 | 0  | ADD  | 7351  | NA       | NA       | NA      | NA    | NA        | NA       |
| 16  | rs56834409 | 84532277 | G  | ADD  | 7347  | 0.9357   | 0.05893  | 0.8336  | 1.05  | -1.128    | 0.2595   |
| 16  | 84532342   | 84532342 | C  | ADD  | 4970  | 0.9218   | 0.0835   | 0.7826  | 1.086 | -0.9751   | 0.3295   |
| 16  | rs4843322  | 84532386 | G  | ADD  | 7346  | 0.9345   | 0.05887  | 0.8327  | 1.049 | -1.151    | 0.2499   |
| 16  | rs4843323  | 84532462 | T  | ADD  | 7354  | NA       | NA       | NA      | NA    | NA        | NA       |
| 16  | rs12596291 | 84532538 | C  | ADD  | 7343  | 0.9348   | 0.05896  | 0.8328  | 1.049 | -1.143    | 0.2532   |
| 16  | rs12596295 | 84532576 | A  | ADD  | 7337  | 0.8951   | 0.06337  | 0.7905  | 1.013 | -1.749    | 0.08024  |
| 16  | rs4843869  | 84532642 | A  | ADD  | 7367  | NA       | NA       | NA      | NA    | NA        | NA       |



| CHR | SNP        | BP       | A1 | TEST | NMISS | OR       | SE       | L95     | U95    | STAT       | P        |
|-----|------------|----------|----|------|-------|----------|----------|---------|--------|------------|----------|
| 16  | 84532733   | 84532733 | 0  | ADD  | 7206  | NA       | NA       | NA      | NA     | NA         | NA       |
| 16  | 84532800   | 84532800 | G  | ADD  | 7084  | 1.502    | 0.4546   | 0.616   | 3.66   | 0.8942     | 0.3712   |
| 16  | 84532862   | 84532862 | 0  | ADD  | 7070  | NA       | NA       | NA      | NA     | NA         | NA       |
| 16  | rs305062   | 84533003 | G  | ADD  | 7363  | 1.231    | 0.1753   | 0.8731  | 1.736  | 1.186      | 0.2357   |
| 16  | rs305061   | 84533160 | C  | ADD  | 7342  | 0.9311   | 0.03879  | 0.863   | 1.005  | -1.839     | 0.06585  |
| 16  | 84533416   | 84533416 | C  | ADD  | 4271  | 1.175    | 0.0716   | 1.021   | 1.352  | 2.25       | 0.02446  |
| 16  | rs305060   | 84533417 | C  | ADD  | 7339  | 1.069    | 0.03874  | 0.9907  | 1.153  | 1.718      | 0.08576  |
| 16  | rs16940099 | 84533441 | C  | ADD  | 7332  | 0.9518   | 0.08938  | 0.7988  | 1.134  | -0.5531    | 0.5802   |
| 16  | rs16940100 | 84533460 | T  | ADD  | 7347  | 0.9618   | 0.08824  | 0.8091  | 1.143  | -0.4411    | 0.6591   |
| 16  | 84533481   | 84533481 | 0  | ADD  | 7365  | NA       | NA       | NA      | NA     | NA         | NA       |
| 16  | rs305059   | 84533519 | A  | ADD  | 7134  | 1.053    | 0.03932  | 0.975   | 1.137  | 1.315      | 0.1885   |
| 16  | 84533526   | 84533526 | 0  | ADD  | 7360  | NA       | NA       | NA      | NA     | NA         | NA       |
| 16  | 84533672   | 84533672 | T  | ADD  | 7347  | 0.9618   | 0.08824  | 0.8091  | 1.143  | -0.4411    | 0.6591   |
| 16  | 84533804   | 84533804 | C  | ADD  | 7346  | 0.9616   | 0.08824  | 0.8089  | 1.143  | -0.4432    | 0.6576   |
| 16  | 84533839   | 84533839 | 0  | ADD  | 7221  | NA       | NA       | NA      | NA     | NA         | NA       |
| 16  | 84533939   | 84533939 | C  | ADD  | 7197  | 0.9657   | 0.08855  | 0.8119  | 1.149  | -0.3938    | 0.6937   |
| 16  | 84534522   | 84534522 | G  | ADD  | 7281  | 1.101    | 0.2239   | 0.7102  | 1.708  | 0.4312     | 0.6664   |
| 16  | 84534632   | 84534632 | C  | ADD  | 7362  | 1.515    | 0.8008   | 0.3153  | 7.276  | 0.5184     | 0.6042   |
| 16  | 84534741   | 84534741 | T  | ADD  | 7236  | 1.215    | 0.5181   | 0.4401  | 3.354  | 0.3759     | 0.707    |
| 16  | rs7202472  | 84535003 | T  | ADD  | 7318  | 0.8815   | 0.1547   | 0.6509  | 1.194  | -0.8154    | 0.4149   |
| 16  | 84535111   | 84535111 | T  | ADD  | 7227  | 0.9131   | 0.2032   | 0.6131  | 1.36   | -0.4474    | 0.6546   |
| 16  | 84535271   | 84535271 | A  | ADD  | 7333  | 0.2811   | 0.8395   | 0.05423 | 1.457  | -1.512     | 0.1306   |
| 16  | 84535272   | 84535272 | A  | ADD  | 7350  | 0.1743   | 1.122    | 0.01932 | 1.572  | -1.557     | 0.1196   |
| 16  | rs305097   | 84535412 | A  | ADD  | 7264  | 1.127    | 0.04022  | 1.042   | 1.22   | 2.976      | 0.002925 |
| 16  | rs62051024 | 84535456 | C  | ADD  | 7073  | 1.055    | 0.04567  | 0.9646  | 1.154  | 1.17       | 0.242    |
| 16  | rs305095   | 84535500 | T  | ADD  | 7333  | 1.126    | 0.04013  | 1.041   | 1.218  | 2.961      | 0.003064 |
| 16  | rs305094   | 84535606 | C  | ADD  | 7310  | 0.9384   | 0.03891  | 0.8695  | 1.013  | -1.633     | 0.1025   |
| 16  | rs72807020 | 84535618 | G  | ADD  | 7311  | 0.8941   | 0.057    | 0.7996  | 0.9997 | -1.964     | 0.04948  |
| 16  | rs16940101 | 84535626 | G  | ADD  | 7364  | 0.9455   | 0.08672  | 0.7977  | 1.121  | -0.6468    | 0.5178   |
| 16  | rs16940103 | 84535710 | T  | ADD  | 7309  | 0.8863   | 0.05705  | 0.7925  | 0.9911 | -2.116     | 0.03432  |
| 16  | rs16940104 | 84535711 | T  | ADD  | 7347  | 0.9441   | 0.08819  | 0.7943  | 1.122  | -0.6518    | 0.5145   |
| 16  | rs7186094  | 84535988 | T  | ADD  | 7358  | 0.9353   | 0.05283  | 0.8433  | 1.037  | -1.267     | 0.2052   |
| 16  | rs7190319  | 84536046 | G  | ADD  | 7362  | 0.937    | 0.05287  | 0.8448  | 1.039  | -1.23      | 0.2187   |
| 16  | rs305093   | 84536086 | T  | ADD  | 7335  | 0.9356   | 0.03891  | 0.8669  | 1.01   | -1.711     | 0.08716  |
| 16  | 84536244   | 84536244 | 0  | ADD  | 7357  | NA       | NA       | NA      | NA     | NA         | NA       |
| 16  | rs11639990 | 84536305 | G  | ADD  | 7363  | 0.9374   | 0.05281  | 0.8453  | 1.04   | -1.223     | 0.2212   |
| 16  | 84536585   | 84536585 | 0  | ADD  | 7273  | NA       | NA       | NA      | NA     | NA         | NA       |
| 16  | 84536608   | 84536608 | C  | ADD  | 7333  | 2.736    | 0.5039   | 1.019   | 7.346  | 1.998      | 0.04573  |
| 16  | rs305092   | 84536618 | A  | ADD  | 7305  | 0.9312   | 0.0388   | 0.863   | 1.005  | -1.837     | 0.06619  |
| 16  | rs305091   | 84536744 | A  | ADD  | 7330  | 0.9238   | 0.03865  | 0.8564  | 0.9965 | -2.05      | 0.0404   |
| 16  | 84536846   | 84536846 | C  | ADD  | 3160  | 1.025    | 0.07376  | 0.887   | 1.184  | 0.3345     | 0.738    |
| 16  | rs305090   | 84536847 | T  | ADD  | 7314  | 0.9321   | 0.03874  | 0.864   | 1.006  | -1.815     | 0.06959  |
| 16  | 84536862   | 84536862 | A  | ADD  | 7362  | 2.136    | 0.5616   | 0.7106  | 6.423  | 1.352      | 0.1765   |
| 16  | 84537033   | 84537033 | T  | ADD  | 7303  | 4.08E-10 | 2.44E+04 | 0       | inf    | -0.0008869 | 0.9993   |
| 16  | 84537070   | 84537070 | T  | ADD  | 7335  | 0.3519   | 0.8459   | 0.06705 | 1.847  | -1.235     | 0.2169   |
| 16  | 84537135   | 84537135 | 0  | ADD  | 7322  | NA       | NA       | NA      | NA     | NA         | NA       |
| 16  | 84537212   | 84537212 | A  | ADD  | 7353  | 7.19E-10 | 1.62E+04 | 0       | inf    | -0.001301  | 0.999    |
| 16  | 84537309   | 84537309 | 0  | ADD  | 7356  | NA       | NA       | NA      | NA     | NA         | NA       |
| 16  | rs11641591 | 84537652 | T  | ADD  | 7311  | 1.098    | 0.1802   | 0.771   | 1.563  | 0.5167     | 0.6054   |
| 16  | rs62051025 | 84537707 | T  | ADD  | 6927  | 1.067    | 0.04454  | 0.9775  | 1.164  | 1.45       | 0.1471   |
| 16  | rs965773   | 84537847 | A  | ADD  | 7310  | 1.109    | 0.03889  | 1.028   | 1.197  | 2.67       | 0.007588 |
| 16  | rs16940113 | 84537948 | T  | ADD  | 7360  | 1.149    | 0.8678   | 0.2097  | 6.293  | 0.1597     | 0.8731   |
| 16  | 84538025   | 84538025 | G  | ADD  | 7326  | 1        | 0.0944   | 0.8313  | 1.204  | 0.002861   | 0.9977   |

| CHR | SNP        | BP       | A1 | TEST | NMISS | OR       | SE       | L95     | U95    | STAT       | P        |
|-----|------------|----------|----|------|-------|----------|----------|---------|--------|------------|----------|
| 16  | rs731708   | 84538035 | A  | ADD  | 7278  | 0.9216   | 0.1491   | 0.6881  | 1.234  | -0.5476    | 0.5839   |
| 16  | 84538040   | 84538040 | T  | ADD  | 7061  | 0.6366   | 0.2578   | 0.3841  | 1.055  | -1.751     | 0.0799   |
| 16  | rs731709   | 84538088 | C  | ADD  | 7331  | 1.113    | 0.03996  | 1.029   | 1.203  | 2.675      | 0.007462 |
| 16  | 84538106   | 84538106 | T  | ADD  | 7049  | 1.094    | 0.2492   | 0.6711  | 1.782  | 0.3592     | 0.7194   |
| 16  | 84538380   | 84538380 | O  | ADD  | 7340  | NA       | NA       | NA      | NA     | NA         | NA       |
| 16  | rs731707   | 84538469 | C  | ADD  | 7314  | 1.114    | 0.03886  | 1.032   | 1.202  | 2.768      | 0.005635 |
| 16  | 84538530   | 84538530 | A  | ADD  | 7333  | 0.8584   | 1.063    | 0.1069  | 6.894  | -0.1436    | 0.8858   |
| 16  | rs305089   | 84538531 | T  | ADD  | 7340  | 0.9321   | 0.03895  | 0.8635  | 1.006  | -1.806     | 0.07085  |
| 16  | 84538676   | 84538676 | O  | ADD  | 7339  | NA       | NA       | NA      | NA     | NA         | NA       |
| 16  | 84538740   | 84538740 | T  | ADD  | 7252  | 0.5617   | 1.016    | 0.07676 | 4.111  | -0.5679    | 0.5701   |
| 16  | 84538942   | 84538942 | G  | ADD  | 7056  | 0.8613   | 0.1979   | 0.5845  | 1.269  | -0.7544    | 0.4506   |
| 16  | 84538944   | 84538944 | T  | ADD  | 7349  | 3.69E-10 | 1.72E+04 | 0       | inf    | -0.00126   | 0.999    |
| 16  | rs11643168 | 84538983 | T  | ADD  | 7305  | 0.976    | 0.06982  | 0.8511  | 1.119  | -0.3486    | 0.7274   |
| 16  | rs305088   | 84539102 | T  | ADD  | 7295  | 0.9491   | 0.03908  | 0.8792  | 1.025  | -1.336     | 0.1816   |
| 16  | 84539195   | 84539195 | C  | ADD  | 7365  | 1.20E+09 | 2.44E+04 | 0       | inf    | 0.0008576  | 0.9993   |
| 16  | 84539211   | 84539211 | C  | ADD  | 7349  | 1.294    | 1.225    | 0.1172  | 14.28  | 0.2102     | 0.8335   |
| 16  | 84539306   | 84539306 | A  | ADD  | 6341  | 1.1      | 0.08837  | 0.9248  | 1.308  | 1.075      | 0.2824   |
| 16  | rs305087   | 84539747 | C  | ADD  | 6951  | 0.8772   | 0.0548   | 0.7879  | 0.9767 | -2.391     | 0.01682  |
| 16  | rs7198504  | 84539802 | C  | ADD  | 6815  | 0.9101   | 0.04199  | 0.8382  | 0.9882 | -2.243     | 0.02491  |
| 16  | rs9935237  | 84540017 | G  | ADD  | 6228  | 0.7051   | 0.3443   | 0.359   | 1.385  | -1.015     | 0.3101   |
| 16  | rs305086   | 84540022 | A  | ADD  | 7361  | 1.018    | 0.04851  | 0.9258  | 1.12   | 0.3707     | 0.7109   |
| 16  | rs8053060  | 84540490 | A  | ADD  | 5057  | 1.066    | 0.05014  | 0.9658  | 1.176  | 1.267      | 0.2053   |
| 16  | 84540536   | 84540536 | O  | ADD  | 7367  | NA       | NA       | NA      | NA     | NA         | NA       |
| 16  | 84540547   | 84540547 | O  | ADD  | 7367  | NA       | NA       | NA      | NA     | NA         | NA       |
| 16  | rs6540234  | 84540557 | T  | ADD  | 7312  | 0.9529   | 0.03865  | 0.8834  | 1.028  | -1.249     | 0.2118   |
| 16  | rs8049187  | 84540779 | T  | ADD  | 5076  | 1.075    | 0.04253  | 0.9888  | 1.168  | 1.694      | 0.09018  |
| 16  | rs8062690  | 84540827 | G  | ADD  | 5011  | 0.9392   | 0.05886  | 0.8368  | 1.054  | -1.066     | 0.2863   |
| 16  | rs8053604  | 84540842 | T  | ADD  | 4305  | 1.059    | 0.0464   | 0.9666  | 1.159  | 1.228      | 0.2194   |
| 16  | 84541049   | 84541049 | G  | ADD  | 7354  | 3.76E-10 | 2.44E+04 | 0       | inf    | -0.0008902 | 0.9993   |
| 16  | 84541077   | 84541077 | O  | ADD  | 7039  | NA       | NA       | NA      | NA     | NA         | NA       |
| 16  | 84541142   | 84541142 | G  | ADD  | 7364  | 3.77E-10 | 2.44E+04 | 0       | inf    | -0.0008901 | 0.9993   |
| 16  | 84541177   | 84541177 | C  | ADD  | 4187  | 0.9343   | 0.04776  | 0.8508  | 1.026  | -1.424     | 0.1545   |
| 16  | 84541179   | 84541179 | T  | ADD  | 4186  | 0.9353   | 0.04777  | 0.8517  | 1.027  | -1.401     | 0.1612   |
| 16  | 84541180   | 84541180 | C  | ADD  | 4186  | 0.9353   | 0.04777  | 0.8517  | 1.027  | -1.401     | 0.1612   |
| 16  | rs2361768  | 84541181 | G  | ADD  | 4186  | 0.9353   | 0.04777  | 0.8517  | 1.027  | -1.401     | 0.1612   |
| 16  | 84541385   | 84541385 | A  | ADD  | 7355  | 3.76E-10 | 2.44E+04 | 0       | inf    | -0.0008902 | 0.9993   |
| 16  | 84541450   | 84541450 | G  | ADD  | 7317  | 0.7636   | 1.424    | 0.04689 | 12.44  | -0.1894    | 0.8497   |
| 16  | rs55739703 | 84541492 | G  | ADD  | 7301  | 0.9191   | 0.1163   | 0.7317  | 1.154  | -0.7254    | 0.4682   |
| 16  | rs870614   | 84541516 | A  | ADD  | 5830  | 0.9318   | 0.05541  | 0.8359  | 1.039  | -1.275     | 0.2024   |
| 16  | rs8047292  | 84541556 | T  | ADD  | 7363  | 0.5835   | 0.4908   | 0.223   | 1.527  | -1.098     | 0.2723   |
| 16  | rs908988   | 84542101 | G  | ADD  | 7338  | 0.9597   | 0.03802  | 0.8908  | 1.034  | -1.082     | 0.2792   |
| 16  | rs8060078  | 84542153 | T  | ADD  | 7345  | 2.353    | 0.6662   | 0.6377  | 8.685  | 1.285      | 0.1989   |
| 16  | rs908987   | 84542390 | T  | ADD  | 6943  | 0.9618   | 0.03898  | 0.891   | 1.038  | -1         | 0.3172   |
| 16  | rs908986   | 84542429 | G  | ADD  | 7339  | 0.9721   | 0.03849  | 0.9015  | 1.048  | -0.7348    | 0.4625   |
| 16  | rs908985   | 84542503 | T  | ADD  | 7344  | 0.9697   | 0.03848  | 0.8992  | 1.046  | -0.8002    | 0.4236   |
| 16  | 84542511   | 84542511 | A  | ADD  | 7342  | 0.6701   | 0.667    | 0.1813  | 2.477  | -0.6001    | 0.5484   |
| 16  | rs908984   | 84542530 | T  | ADD  | 7362  | 0.9715   | 0.03847  | 0.901   | 1.048  | -0.7511    | 0.4526   |
| 16  | rs57670691 | 84542583 | A  | ADD  | 7319  | 0.882    | 0.1111   | 0.7094  | 1.097  | -1.13      | 0.2583   |
| 16  | rs57396687 | 84542701 | A  | ADD  | 7322  | 0.9019   | 0.1123   | 0.7236  | 1.124  | -0.9195    | 0.3579   |
| 16  | rs1915034  | 84542858 | A  | ADD  | 7352  | 0.9825   | 0.03934  | 0.9095  | 1.061  | -0.45      | 0.6527   |
| 16  | rs4240807  | 84542862 | A  | ADD  | 7337  | 0.9822   | 0.03936  | 0.9092  | 1.061  | -0.4575    | 0.6473   |
| 16  | rs1915033  | 84542932 | A  | ADD  | 7322  | 0.9724   | 0.03851  | 0.9017  | 1.049  | -0.7267    | 0.4674   |
| 16  | 84542936   | 84542936 | T  | ADD  | 7364  | 3.77E-10 | 2.44E+04 | 0       | inf    | -0.0008901 | 0.9993   |

| CHR | SNP        | BP       | A1 | TEST | NMISS | OR       | SE       | L95     | U95   | STAT       | P      |
|-----|------------|----------|----|------|-------|----------|----------|---------|-------|------------|--------|
| 16  | 84542966   | 84542966 | C  | ADD  | 7364  | 3.77E-10 | 2.44E+04 | 0       | inf   | -0.0008901 | 0.9993 |
| 16  | rs4843871  | 84543036 | G  | ADD  | 7319  | 0.965    | 0.03821  | 0.8954  | 1.04  | -0.9325    | 0.3511 |
| 16  | rs4843872  | 84543172 | A  | ADD  | 7346  | 0.9698   | 0.03845  | 0.8994  | 1.046 | -0.7986    | 0.4245 |
| 16  | 84543226   | 84543226 | A  | ADD  | 7366  | 6.64E+08 | 2.44E+04 | 0       | inf   | 0.0008333  | 0.9993 |
| 16  | rs10863201 | 84543272 | C  | ADD  | 7101  | 0.9653   | 0.03865  | 0.8948  | 1.041 | -0.915     | 0.3602 |
| 16  | rs58073431 | 84543416 | C  | ADD  | 7322  | 0.8891   | 0.1126   | 0.7131  | 1.109 | -1.044     | 0.2966 |
| 16  | rs59821663 | 84543420 | A  | ADD  | 7322  | 0.8891   | 0.1126   | 0.7131  | 1.109 | -1.044     | 0.2966 |
| 16  | 84543445   | 84543445 | O  | ADD  | 7362  | NA       | NA       | NA      | NA    | NA         | NA     |
| 16  | 84543446   | 84543446 | O  | ADD  | 7362  | NA       | NA       | NA      | NA    | NA         | NA     |
| 16  | rs59403904 | 84543458 | T  | ADD  | 7235  | 0.9806   | 0.1339   | 0.7543  | 1.275 | -0.1467    | 0.8834 |
| 16  | 84543506   | 84543506 | O  | ADD  | 7367  | NA       | NA       | NA      | NA    | NA         | NA     |
| 16  | 84543518   | 84543518 | O  | ADD  | 7367  | NA       | NA       | NA      | NA    | NA         | NA     |
| 16  | rs58189590 | 84543560 | A  | ADD  | 7316  | 0.8825   | 0.1124   | 0.708   | 1.1   | -1.112     | 0.2661 |
| 16  | rs57426547 | 84543596 | T  | ADD  | 7316  | 0.8825   | 0.1124   | 0.708   | 1.1   | -1.112     | 0.2661 |
| 16  | 84543660   | 84543660 | O  | ADD  | 7367  | NA       | NA       | NA      | NA    | NA         | NA     |
| 16  | rs73268906 | 84544188 | G  | ADD  | 7317  | 0.8888   | 0.1126   | 0.7128  | 1.108 | -1.047     | 0.2949 |
| 16  | rs73268908 | 84544290 | A  | ADD  | 7325  | 0.8948   | 0.1127   | 0.7174  | 1.116 | -0.9859    | 0.3242 |
| 16  | rs73268912 | 84544401 | A  | ADD  | 7320  | 0.9027   | 0.1125   | 0.7241  | 1.125 | -0.9101    | 0.3627 |
| 16  | 84544635   | 84544635 | T  | ADD  | 7321  | 0.5427   | 0.6656   | 0.1472  | 2     | -0.9182    | 0.3585 |
| 16  | 84544641   | 84544641 | O  | ADD  | 7365  | NA       | NA       | NA      | NA    | NA         | NA     |
| 16  | 84544743   | 84544743 | G  | ADD  | 7364  | 3.77E-10 | 2.44E+04 | 0       | inf   | -0.0008901 | 0.9993 |
| 16  | rs59120392 | 84544797 | T  | ADD  | 7328  | 0.8992   | 0.1126   | 0.7211  | 1.121 | -0.9435    | 0.3454 |
| 16  | rs57278440 | 84544999 | C  | ADD  | 7329  | 0.899    | 0.1126   | 0.7209  | 1.121 | -0.946     | 0.3442 |
| 16  | rs10863202 | 84545499 | A  | ADD  | 7241  | 0.9707   | 0.0384   | 0.9003  | 1.047 | -0.7742    | 0.4388 |
| 16  | rs8060960  | 84545861 | T  | ADD  | 7313  | 0.9586   | 0.03863  | 0.8887  | 1.034 | -1.095     | 0.2735 |
| 16  | rs8048151  | 84546099 | C  | ADD  | 7298  | 0.9749   | 0.0391   | 0.903   | 1.053 | -0.6503    | 0.5155 |
| 16  | 84546166   | 84546166 | A  | ADD  | 7325  | 0.5304   | 0.8898   | 0.09273 | 3.034 | -0.7126    | 0.4761 |
| 16  | 84546175   | 84546175 | A  | ADD  | 7364  | 3.77E-10 | 2.44E+04 | 0       | inf   | -0.0008901 | 0.9993 |
| 16  | rs73268923 | 84546268 | T  | ADD  | 7328  | 0.9083   | 0.1129   | 0.728   | 1.133 | -0.852     | 0.3942 |
| 16  | 84546359   | 84546359 | A  | ADD  | 7323  | 0.8962   | 0.1125   | 0.7188  | 1.117 | -0.9737    | 0.3302 |
| 16  | rs6540235  | 84546396 | T  | ADD  | 7322  | 0.969    | 0.03829  | 0.8989  | 1.045 | -0.8226    | 0.4107 |
| 16  | 84546553   | 84546553 | O  | ADD  | 7340  | NA       | NA       | NA      | NA    | NA         | NA     |
| 16  | rs7186247  | 84546570 | T  | ADD  | 7315  | 0.9673   | 0.03829  | 0.8974  | 1.043 | -0.868     | 0.3854 |
| 16  | 84546654   | 84546654 | G  | ADD  | 7272  | 1.048    | 0.4616   | 0.424   | 2.589 | 0.1011     | 0.9195 |
| 16  | rs7199472  | 84546685 | G  | ADD  | 7356  | 0.9619   | 0.0382   | 0.8925  | 1.037 | -1.018     | 0.3086 |
| 16  | rs11640143 | 84546965 | C  | ADD  | 7337  | 0.894    | 0.07194  | 0.7764  | 1.029 | -1.557     | 0.1194 |
| 16  | 84547130   | 84547130 | T  | ADD  | 7296  | 1.389    | 1.468    | 0.0782  | 24.66 | 0.2237     | 0.823  |
| 16  | 84547216   | 84547216 | T  | ADD  | 7367  | 1.701    | 1.157    | 0.1763  | 16.42 | 0.4595     | 0.6459 |
| 16  | rs4843873  | 84547276 | A  | ADD  | 7341  | 0.9877   | 0.0388   | 0.9154  | 1.066 | -0.319     | 0.7497 |
| 16  | 84547352   | 84547352 | A  | ADD  | 7273  | 1.772    | 0.3948   | 0.8171  | 3.841 | 1.448      | 0.1475 |
| 16  | rs4843874  | 84547399 | C  | ADD  | 7343  | 0.9783   | 0.03874  | 0.9068  | 1.055 | -0.5664    | 0.5711 |
| 16  | rs4843875  | 84547443 | T  | ADD  | 5768  | 1.05     | 0.05566  | 0.9418  | 1.171 | 0.8831     | 0.3772 |
| 16  | 84547570   | 84547570 | O  | ADD  | 7367  | NA       | NA       | NA      | NA    | NA         | NA     |
| 16  | 84547601   | 84547601 | C  | ADD  | 7326  | 0.5308   | 0.8899   | 0.09278 | 3.036 | -0.7118    | 0.4766 |
| 16  | rs73268928 | 84547653 | G  | ADD  | 7309  | 0.9253   | 0.1149   | 0.7388  | 1.159 | -0.6756    | 0.4993 |
| 16  | 84547657   | 84547657 | O  | ADD  | 7337  | NA       | NA       | NA      | NA    | NA         | NA     |
| 16  | rs11117426 | 84547768 | C  | ADD  | 7275  | 0.9512   | 0.05205  | 0.8589  | 1.053 | -0.961     | 0.3366 |
| 16  | 84547926   | 84547926 | C  | ADD  | 7365  | 3.77E-10 | 2.44E+04 | 0       | inf   | -0.0008901 | 0.9993 |
| 16  | rs11117427 | 84548058 | A  | ADD  | 7235  | 0.9534   | 0.05258  | 0.86    | 1.057 | -0.908     | 0.3639 |
| 16  | rs925992   | 84548081 | T  | ADD  | 7134  | 0.9809   | 0.03947  | 0.9079  | 1.06  | -0.4876    | 0.6258 |
| 16  | 84548374   | 84548374 | T  | ADD  | 7366  | 3.77E-10 | 2.44E+04 | 0       | inf   | -0.0008901 | 0.9993 |
| 16  | 84548382   | 84548382 | C  | ADD  | 7291  | 0.338    | 0.7199   | 0.08245 | 1.386 | -1.507     | 0.1319 |
| 16  | rs8057009  | 84548424 | G  | ADD  | 7355  | 0.9972   | 0.04027  | 0.9216  | 1.079 | -0.06886   | 0.9451 |

| CHR | SNP        | BP       | A1 | TEST | NMISS | OR       | SE       | L95     | U95    | STAT       | P       |
|-----|------------|----------|----|------|-------|----------|----------|---------|--------|------------|---------|
| 16  | rs6540236  | 84548591 | A  | ADD  | 7263  | 0.9901   | 0.03915  | 0.917   | 1.069  | -0.2541    | 0.7994  |
| 16  | rs12445476 | 84548770 | G  | ADD  | 7363  | 0.9459   | 0.0522   | 0.8539  | 1.048  | -1.066     | 0.2866  |
| 16  | 84548866   | 84548866 | G  | ADD  | 7360  | 8.868    | 1.097    | 1.032   | 76.21  | 1.989      | 0.04673 |
| 16  | 84548901   | 84548901 | T  | ADD  | 5806  | 0.9216   | 0.1086   | 0.7449  | 1.14   | -0.7522    | 0.4519  |
| 16  | rs7185590  | 84549154 | A  | ADD  | 7321  | 1.436    | 0.3367   | 0.7421  | 2.778  | 1.074      | 0.2828  |
| 16  | rs11642873 | 84549206 | C  | ADD  | 7303  | 0.9478   | 0.05289  | 0.8545  | 1.051  | -1.013     | 0.3109  |
| 16  | 84549320   | 84549320 | C  | ADD  | 6310  | 0.6619   | 0.2361   | 0.4167  | 1.051  | -1.748     | 0.08055 |
| 16  | rs6540238  | 84549328 | A  | ADD  | 7225  | 0.9886   | 0.03915  | 0.9156  | 1.067  | -0.2933    | 0.7693  |
| 16  | rs12444486 | 84550150 | C  | ADD  | 7266  | 0.9561   | 0.03598  | 0.891   | 1.026  | -1.247     | 0.2125  |
| 16  | rs4843876  | 84550233 | T  | ADD  | 7359  | 0.9822   | 0.03846  | 0.9109  | 1.059  | -0.4676    | 0.6401  |
| 16  | rs11117428 | 84550330 | C  | ADD  | 7079  | 0.9968   | 0.04314  | 0.916   | 1.085  | -0.07503   | 0.9402  |
| 16  | rs2361764  | 84550459 | G  | ADD  | 7234  | 0.9841   | 0.03871  | 0.9122  | 1.062  | -0.4129    | 0.6797  |
| 16  | 84550594   | 84550594 | O  | ADD  | 7367  | NA       | NA       | NA      | NA     | NA         | NA      |
| 16  | rs2361763  | 84550635 | T  | ADD  | 7279  | 1.009    | 0.03602  | 0.9406  | 1.083  | 0.261      | 0.7941  |
| 16  | rs2885364  | 84550691 | A  | ADD  | 7261  | 0.9832   | 0.03864  | 0.9115  | 1.061  | -0.4385    | 0.661   |
| 16  | rs4843877  | 84550733 | C  | ADD  | 7243  | 0.9732   | 0.03867  | 0.9022  | 1.05   | -0.703     | 0.482   |
| 16  | rs35929052 | 84551985 | T  | ADD  | 7069  | 0.986    | 0.07206  | 0.8561  | 1.136  | -0.1955    | 0.845   |
| 16  | rs908983   | 84552021 | C  | ADD  | 7356  | 0.9926   | 0.03803  | 0.9213  | 1.069  | -0.1943    | 0.8459  |
| 16  | rs883332   | 84552225 | C  | ADD  | 7364  | 1.143    | 0.2212   | 0.7408  | 1.763  | 0.6034     | 0.5462  |
| 16  | rs34347181 | 84552262 | O  | ADD  | 7365  | NA       | NA       | NA      | NA     | NA         | NA      |
| 16  | rs2049086  | 84552380 | T  | ADD  | 7085  | 0.9797   | 0.03888  | 0.9078  | 1.057  | -0.5274    | 0.5979  |
| 16  | rs908982   | 84552384 | A  | ADD  | 7104  | 0.9786   | 0.03873  | 0.9071  | 1.056  | -0.5573    | 0.5774  |
| 16  | 84552424   | 84552424 | O  | ADD  | 7367  | NA       | NA       | NA      | NA     | NA         | NA      |
| 16  | rs8044852  | 84552728 | A  | ADD  | 7264  | 0.9671   | 0.03789  | 0.8979  | 1.042  | -0.8815    | 0.378   |
| 16  | rs908981   | 84552926 | T  | ADD  | 7349  | 0.9731   | 0.03771  | 0.9038  | 1.048  | -0.7223    | 0.4701  |
| 16  | 84552937   | 84552937 | C  | ADD  | 6905  | 0.8536   | 0.07841  | 0.732   | 0.9954 | -2.019     | 0.04349 |
| 16  | rs12446139 | 84553085 | G  | ADD  | 7349  | 0.9731   | 0.03771  | 0.9038  | 1.048  | -0.7223    | 0.4701  |
| 16  | 84553110   | 84553110 | C  | ADD  | 7290  | 0.9382   | 0.1184   | 0.7439  | 1.183  | -0.5389    | 0.59    |
| 16  | rs12919427 | 84553160 | A  | ADD  | 7349  | 0.9731   | 0.03771  | 0.9038  | 1.048  | -0.7223    | 0.4701  |
| 16  | rs12930405 | 84553163 | C  | ADD  | 7349  | 0.9731   | 0.03771  | 0.9038  | 1.048  | -0.7223    | 0.4701  |
| 16  | rs11642456 | 84553581 | T  | ADD  | 7348  | 0.9734   | 0.03771  | 0.904   | 1.048  | -0.715     | 0.4746  |
| 16  | 84553752   | 84553752 | T  | ADD  | 7320  | 0.7642   | 1.424    | 0.04692 | 12.44  | -0.1889    | 0.8501  |
| 16  | rs11649461 | 84553758 | C  | ADD  | 7122  | 0.9709   | 0.03796  | 0.9013  | 1.046  | -0.7782    | 0.4365  |
| 16  | 84553776   | 84553776 | T  | ADD  | 7355  | 1.603    | 0.6859   | 0.4178  | 6.147  | 0.6876     | 0.4917  |
| 16  | rs11645398 | 84553796 | G  | ADD  | 7205  | 0.9788   | 0.03832  | 0.908   | 1.055  | -0.5598    | 0.5756  |
| 16  | 84554094   | 84554094 | C  | ADD  | 7362  | 3.39E-10 | 2.44E+04 | 0       | inf    | -0.0008944 | 0.9993  |
| 16  | rs4843324  | 84554392 | O  | ADD  | 7353  | NA       | NA       | NA      | NA     | NA         | NA      |
| 16  | rs11643829 | 84554502 | C  | ADD  | 4781  | 0.9826   | 0.04565  | 0.8985  | 1.075  | -0.3837    | 0.7012  |
| 16  | rs35615495 | 84554505 | T  | ADD  | 5292  | 0.9024   | 0.06168  | 0.7996  | 1.018  | -1.665     | 0.09584 |
| 16  | rs11640586 | 84554529 | C  | ADD  | 4376  | 1.101    | 0.0497   | 0.9988  | 1.214  | 1.936      | 0.05288 |
| 16  | rs59015387 | 84554628 | A  | ADD  | 7358  | 3.77E-10 | 2.44E+04 | 0       | inf    | -0.0008901 | 0.9993  |
| 16  | 84554776   | 84554776 | T  | ADD  | 7299  | 2.614    | 0.9211   | 0.4298  | 15.9   | 1.043      | 0.2969  |
| 16  | rs12019053 | 84554782 | G  | ADD  | 5149  | 0.8957   | 0.06194  | 0.7933  | 1.011  | -1.778     | 0.07534 |
| 16  | 84554944   | 84554944 | C  | ADD  | 4005  | 0.9534   | 0.05167  | 0.8615  | 1.055  | -0.9244    | 0.3553  |
| 16  | 84554954   | 84554954 | C  | ADD  | 3591  | 0.9396   | 0.05855  | 0.8377  | 1.054  | -1.065     | 0.2869  |
| 16  | rs11860050 | 84555097 | A  | ADD  | 5211  | 0.8973   | 0.06231  | 0.7941  | 1.014  | -1.739     | 0.08199 |
| 16  | 84555268   | 84555268 | O  | ADD  | 7367  | NA       | NA       | NA      | NA     | NA         | NA      |
| 16  | rs12446834 | 84555541 | C  | ADD  | 4661  | 0.9597   | 0.04568  | 0.8775  | 1.05   | -0.9003    | 0.368   |
| 16  | rs55906426 | 84555779 | C  | ADD  | 6236  | 1.028    | 0.04555  | 0.9403  | 1.124  | 0.6075     | 0.5435  |
| 16  | rs12019051 | 84555863 | G  | ADD  | 4659  | 0.9602   | 0.04568  | 0.878   | 1.05   | -0.8887    | 0.3742  |
| 16  | 84555917   | 84555917 | O  | ADD  | 7352  | NA       | NA       | NA      | NA     | NA         | NA      |
| 16  | 84556011   | 84556011 | O  | ADD  | 7357  | NA       | NA       | NA      | NA     | NA         | NA      |
| 16  | rs16940146 | 84556487 | G  | ADD  | 7360  | 8.009    | 1.112    | 0.9065  | 70.75  | 1.872      | 0.06125 |

| CHR | SNP        | BP       | A1 | TEST | NMISS | OR       | SE       | L95     | U95   | STAT       | P       |
|-----|------------|----------|----|------|-------|----------|----------|---------|-------|------------|---------|
| 16  | 84556512   | 84556512 | 0  | ADD  | 7366  | NA       | NA       | NA      | NA    | NA         | NA      |
| 16  | rs34445961 | 84556804 | G  | ADD  | 4021  | 1.024    | 0.05057  | 0.9271  | 1.13  | 0.4638     | 0.6428  |
| 16  | rs34256051 | 84556806 | C  | ADD  | 4045  | 1.01     | 0.05006  | 0.916   | 1.115 | 0.2069     | 0.8361  |
| 16  | 84556855   | 84556855 | T  | ADD  | 7354  | 8.14E-10 | 1.65E+04 | 0       | inf   | -0.001271  | 0.999   |
| 16  | rs62051883 | 84556897 | A  | ADD  | 7172  | 1.264    | 0.3461   | 0.6415  | 2.491 | 0.6773     | 0.4982  |
| 16  | rs59276136 | 84556910 | A  | ADD  | 4573  | 0.9567   | 0.04616  | 0.8739  | 1.047 | -0.9601    | 0.337   |
| 16  | 84557150   | 84557150 | 0  | ADD  | 7359  | NA       | NA       | NA      | NA    | NA         | NA      |
| 16  | rs11863308 | 84557298 | T  | ADD  | 7358  | 3.77E-10 | 2.44E+04 | 0       | inf   | -0.0008901 | 0.9993  |
| 16  | 84557332   | 84557332 | C  | ADD  | 7031  | 0.8346   | 0.3671   | 0.4065  | 1.714 | -0.4926    | 0.6223  |
| 16  | 84557466   | 84557466 | G  | ADD  | 7358  | 7.26E-10 | 1.17E+04 | 0       | inf   | -0.001798  | 0.9986  |
| 16  | rs12598292 | 84557532 | T  | ADD  | 5602  | 0.9278   | 0.2314   | 0.5894  | 1.46  | -0.324     | 0.7459  |
| 16  | rs8053185  | 84557593 | G  | ADD  | 4398  | 0.9549   | 0.04731  | 0.8704  | 1.048 | -0.975     | 0.3296  |
| 16  | rs12446659 | 84557863 | T  | ADD  | 4350  | 0.9497   | 0.04756  | 0.8652  | 1.042 | -1.085     | 0.2779  |
| 16  | rs35867147 | 84557883 | A  | ADD  | 5214  | 0.8947   | 0.06333  | 0.7903  | 1.013 | -1.757     | 0.07888 |
| 16  | 84557898   | 84557898 | 0  | ADD  | 7343  | NA       | NA       | NA      | NA    | NA         | NA      |
| 16  | rs12446684 | 84557908 | T  | ADD  | 4375  | 0.9529   | 0.04742  | 0.8684  | 1.046 | -1.017     | 0.3093  |
| 16  | rs12444385 | 84557964 | A  | ADD  | 4346  | 0.9494   | 0.04758  | 0.8649  | 1.042 | -1.092     | 0.2751  |
| 16  | 84558091   | 84558091 | C  | ADD  | 4344  | 0.9501   | 0.04758  | 0.8655  | 1.043 | -1.076     | 0.2819  |
| 16  | rs9924246  | 84558107 | C  | ADD  | 4344  | 0.9501   | 0.04758  | 0.8655  | 1.043 | -1.076     | 0.2819  |
| 16  | 84558180   | 84558180 | C  | ADD  | 3180  | 0.9531   | 0.05652  | 0.8532  | 1.065 | -0.8496    | 0.3955  |
| 16  | 84558188   | 84558188 | C  | ADD  | 3806  | 0.983    | 0.05154  | 0.8885  | 1.087 | -0.3331    | 0.7391  |
| 16  | rs9926350  | 84558192 | A  | ADD  | 2483  | 1.068    | 0.06599  | 0.938   | 1.215 | 0.9899     | 0.3222  |
| 16  | rs9934574  | 84558465 | T  | ADD  | 5190  | 0.8968   | 0.06344  | 0.7919  | 1.016 | -1.718     | 0.08589 |
| 16  | rs9941263  | 84558545 | G  | ADD  | 4348  | 0.9507   | 0.04755  | 0.8661  | 1.044 | -1.064     | 0.2874  |
| 16  | rs9934725  | 84558585 | T  | ADD  | 4347  | 0.9506   | 0.04755  | 0.866   | 1.043 | -1.065     | 0.2867  |
| 16  | 84558619   | 84558619 | T  | ADD  | 7270  | 0.3384   | 0.7198   | 0.08256 | 1.387 | -1.505     | 0.1323  |
| 16  | rs9938885  | 84558713 | G  | ADD  | 4332  | 0.9538   | 0.04767  | 0.8687  | 1.047 | -0.9918    | 0.3213  |
| 16  | rs11648475 | 84558762 | G  | ADD  | 3592  | 0.9148   | 0.05133  | 0.8272  | 1.012 | -1.735     | 0.08267 |
| 16  | rs74032515 | 84558875 | G  | ADD  | 7031  | 0.8346   | 0.3671   | 0.4065  | 1.714 | -0.4926    | 0.6223  |
| 16  | rs74032517 | 84558990 | 0  | ADD  | 7366  | NA       | NA       | NA      | NA    | NA         | NA      |
| 16  | rs72807046 | 84559122 | T  | ADD  | 6474  | 0.8196   | 0.2153   | 0.5375  | 1.25  | -0.9243    | 0.3553  |
| 16  | 84559204   | 84559204 | C  | ADD  | 7347  | 2.567    | 1.119    | 0.2865  | 22.99 | 0.8426     | 0.3995  |
| 16  | 84559353   | 84559353 | A  | ADD  | 7209  | 2.722    | 1.224    | 0.2471  | 29.98 | 0.8179     | 0.4134  |
| 16  | rs11860004 | 84559380 | A  | ADD  | 3846  | 0.9011   | 0.06536  | 0.7927  | 1.024 | -1.594     | 0.111   |
| 16  | rs34912238 | 84559404 | T  | ADD  | 6888  | 0.9224   | 0.05438  | 0.8292  | 1.026 | -1.486     | 0.1374  |
| 16  | rs35655122 | 84559618 | T  | ADD  | 5235  | 0.9017   | 0.06325  | 0.7966  | 1.021 | -1.636     | 0.1018  |
| 16  | rs11862493 | 84559626 | C  | ADD  | 5234  | 0.9033   | 0.06327  | 0.7979  | 1.023 | -1.608     | 0.1078  |
| 16  | rs11859186 | 84559852 | C  | ADD  | 5039  | 0.9613   | 0.07047  | 0.8373  | 1.104 | -0.5593    | 0.5759  |

Table S5: Conditioning on rs11117427

| CHR | SNP        | BP       | A1 | TEST | NMISS | OR       | SE       | L95     | U95    | STAT     | P         |
|-----|------------|----------|----|------|-------|----------|----------|---------|--------|----------|-----------|
| 16  | rs11861580 | 84456048 | G  | ADD  | 7231  | 0.8465   | 0.0686   | 0.74    | 0.9683 | -2.43    | 0.01511   |
| 16  | rs9934049  | 84456117 | T  | ADD  | 5968  | 1.128    | 0.09585  | 0.9346  | 1.361  | 1.254    | 0.2099    |
| 16  | 84456852   | 84456852 | A  | ADD  | 7286  | 0.6746   | 0.3054   | 0.3708  | 1.227  | -1.289   | 0.1973    |
| 16  | 84457076   | 84457076 | T  | ADD  | 7271  | 1.41E+09 | 1.66E+04 | 0       | inf    | 0.001271 | 0.999     |
| 16  | rs16939834 | 84458109 | C  | ADD  | 7288  | 0.8166   | 0.2307   | 0.5195  | 1.284  | -0.8782  | 0.3798    |
| 16  | 84458146   | 84458146 | A  | ADD  | 7283  | 1.02E+09 | 1.72E+04 | 0       | inf    | 0.001204 | 0.999     |
| 16  | rs11864884 | 84458540 | T  | ADD  | 7282  | 1.012    | 0.03903  | 0.9375  | 1.093  | 0.3077   | 0.7583    |
| 16  | rs7185918  | 84458566 | T  | ADD  | 7288  | 1.04     | 0.04321  | 0.9559  | 1.132  | 0.9152   | 0.3601    |
| 16  | 84458726   | 84458726 | C  | ADD  | 7265  | 1.377    | 0.2002   | 0.9301  | 2.039  | 1.598    | 0.11      |
| 16  | rs72805167 | 84458737 | G  | ADD  | 7115  | 1.176    | 0.4319   | 0.5043  | 2.742  | 0.3751   | 0.7076    |
| 16  | 84458834   | 84458834 | O  | ADD  | 6312  | NA       | NA       | NA      | NA     | NA       | NA        |
| 16  | rs11859433 | 84458903 | C  | ADD  | 7238  | 0.8311   | 0.06948  | 0.7253  | 0.9523 | -2.663   | 0.007742  |
| 16  | 84459157   | 84459157 | G  | ADD  | 6969  | 0.8062   | 0.07096  | 0.7015  | 0.9265 | -3.036   | 0.002399  |
| 16  | rs12926601 | 84459167 | T  | ADD  | 7040  | 1.085    | 0.04444  | 0.9947  | 1.184  | 1.84     | 0.0657    |
| 16  | rs4843854  | 84460016 | C  | ADD  | 7263  | 1.071    | 0.03596  | 0.9983  | 1.149  | 1.914    | 0.05566   |
| 16  | rs4843855  | 84460047 | T  | ADD  | 6796  | 1.003    | 0.03958  | 0.9278  | 1.083  | 0.06556  | 0.9477    |
| 16  | rs4843856  | 84460058 | C  | ADD  | 7267  | 1.036    | 0.03571  | 0.9656  | 1.111  | 0.9808   | 0.3267    |
| 16  | rs12930347 | 84461177 | C  | ADD  | 7284  | 1.052    | 0.04201  | 0.9692  | 1.143  | 1.215    | 0.2244    |
| 16  | 84461320   | 84461320 | O  | ADD  | 7289  | NA       | NA       | NA      | NA     | NA       | NA        |
| 16  | rs62052470 | 84461723 | A  | ADD  | 6745  | 0.8403   | 0.09459  | 0.6981  | 1.011  | -1.839   | 0.06589   |
| 16  | 84461729   | 84461729 | O  | ADD  | 7292  | NA       | NA       | NA      | NA     | NA       | NA        |
| 16  | rs62052471 | 84462333 | G  | ADD  | 6540  | 0.9269   | 0.1162   | 0.7382  | 1.164  | -0.6536  | 0.5134    |
| 16  | 84462405   | 84462405 | A  | ADD  | 6205  | 1.028    | 0.04454  | 0.9418  | 1.121  | 0.6137   | 0.5394    |
| 16  | 84462407   | 84462407 | A  | ADD  | 5583  | 1.05     | 0.04912  | 0.9532  | 1.156  | 0.9846   | 0.3248    |
| 16  | 84462423   | 84462423 | A  | ADD  | 5085  | 1.05     | 0.126    | 0.8199  | 1.343  | 0.384    | 0.701     |
| 16  | 84462425   | 84462425 | A  | ADD  | 3679  | 1.152    | 0.09278  | 0.9604  | 1.382  | 1.524    | 0.1274    |
| 16  | 84462437   | 84462437 | C  | ADD  | 3934  | 1.171    | 0.09876  | 0.9648  | 1.421  | 1.597    | 0.1103    |
| 16  | 84462507   | 84462507 | C  | ADD  | 4915  | 1.062    | 0.1001   | 0.8727  | 1.292  | 0.5991   | 0.5491    |
| 16  | 84462539   | 84462539 | C  | ADD  | 7014  | 0.9459   | 0.1165   | 0.7529  | 1.189  | -0.4772  | 0.6332    |
| 16  | rs55697192 | 84462546 | C  | ADD  | 5964  | 1.084    | 0.07346  | 0.9383  | 1.251  | 1.093    | 0.2746    |
| 16  | 84463073   | 84463073 | A  | ADD  | 6606  | 1.387    | 0.2281   | 0.8869  | 2.169  | 1.434    | 0.1516    |
| 16  | 84463237   | 84463237 | T  | ADD  | 7129  | 0.8907   | 0.1945   | 0.6083  | 1.304  | -0.595   | 0.5519    |
| 16  | rs12935659 | 84463429 | C  | ADD  | 7267  | 0.9738   | 0.03863  | 0.9027  | 1.05   | -0.6883  | 0.4913    |
| 16  | 84463607   | 84463607 | O  | ADD  | 7293  | NA       | NA       | NA      | NA     | NA       | NA        |
| 16  | rs72805168 | 84463633 | C  | ADD  | 7158  | 1.319    | 0.9755   | 0.1949  | 8.923  | 0.2835   | 0.7768    |
| 16  | rs62052474 | 84463910 | A  | ADD  | 7260  | 0.788    | 0.06619  | 0.6921  | 0.8971 | -3.601   | 0.0003173 |
| 16  | 84463953   | 84463953 | T  | ADD  | 7247  | 0.7759   | 1.418    | 0.04821 | 12.49  | -0.179   | 0.8579    |
| 16  | 84463987   | 84463987 | O  | ADD  | 7293  | NA       | NA       | NA      | NA     | NA       | NA        |
| 16  | 84464105   | 84464105 | O  | ADD  | 7293  | NA       | NA       | NA      | NA     | NA       | NA        |
| 16  | rs11648716 | 84464117 | G  | ADD  | 7292  | 0.8018   | 0.06517  | 0.7057  | 0.9111 | -3.389   | 0.0007015 |
| 16  | rs8056522  | 84464397 | C  | ADD  | 7282  | 1.057    | 0.04352  | 0.9705  | 1.151  | 1.272    | 0.2035    |
| 16  | rs9929675  | 84464599 | A  | ADD  | 7255  | 0.9779   | 0.03892  | 0.9061  | 1.055  | -0.5736  | 0.5662    |
| 16  | rs9929701  | 84464675 | C  | ADD  | 7256  | 0.9782   | 0.03892  | 0.9064  | 1.056  | -0.565   | 0.5721    |
| 16  | rs9924234  | 84465076 | C  | ADD  | 7261  | 0.98     | 0.03891  | 0.908   | 1.058  | -0.5193  | 0.6036    |
| 16  | rs9930043  | 84465079 | C  | ADD  | 7272  | 0.9794   | 0.0389   | 0.9075  | 1.057  | -0.5341  | 0.5933    |
| 16  | 84465151   | 84465151 | C  | ADD  | 7225  | 1.072    | 0.04339  | 0.9848  | 1.167  | 1.607    | 0.108     |
| 16  | rs9932359  | 84465411 | A  | ADD  | 7259  | 0.9802   | 0.03891  | 0.9082  | 1.058  | -0.5133  | 0.6078    |
| 16  | rs12448297 | 84467210 | O  | ADD  | 7293  | NA       | NA       | NA      | NA     | NA       | NA        |
| 16  | rs13336885 | 84469034 | C  | ADD  | 7143  | 0.9815   | 0.03907  | 0.9092  | 1.06   | -0.477   | 0.6334    |
| 16  | rs7200396  | 84469798 | C  | ADD  | 7264  | 0.9731   | 0.0386   | 0.9021  | 1.05   | -0.7076  | 0.4792    |
| 16  | rs9923975  | 84469936 | G  | ADD  | 7248  | 1.076    | 0.04389  | 0.9869  | 1.172  | 1.661    | 0.09679   |
| 16  | rs9932159  | 84470103 | T  | ADD  | 7270  | 0.9745   | 0.03872  | 0.9033  | 1.051  | -0.6658  | 0.5055    |
| 16  | rs9936199  | 84470118 | G  | ADD  | 7267  | 0.973    | 0.0386   | 0.9021  | 1.049  | -0.7094  | 0.4781    |

| CHR | SNP        | BP       | A1 | TEST | NMISS | OR       | SE       | L95    | U95    | STAT      | P        |
|-----|------------|----------|----|------|-------|----------|----------|--------|--------|-----------|----------|
| 16  | rs750669   | 84470371 | G  | ADD  | 7231  | 1.032    | 0.03592  | 0.9615 | 1.107  | 0.8676    | 0.3856   |
| 16  | rs2017161  | 84470594 | C  | ADD  | 7126  | 0.9638   | 0.03877  | 0.8933 | 1.04   | -0.9516   | 0.3413   |
| 16  | 84470606   | 84470606 | A  | ADD  | 7251  | 1.027    | 0.03573  | 0.9572 | 1.101  | 0.7347    | 0.4625   |
| 16  | 84471137   | 84471137 | G  | ADD  | 7268  | 8.22E+08 | 1.72E+04 | 0      | inf    | 0.001191  | 0.999    |
| 16  | 84471981   | 84471981 | T  | ADD  | 6557  | 0.8801   | 0.1343   | 0.6764 | 1.145  | -0.9505   | 0.3418   |
| 16  | 84472217   | 84472217 | T  | ADD  | 6871  | 4.16E-10 | 2.44E+04 | 0      | inf    | -0.000886 | 0.9993   |
| 16  | rs55967832 | 84472469 | C  | ADD  | 7059  | 1.024    | 0.03613  | 0.9544 | 1.1    | 0.6669    | 0.5048   |
| 16  | rs9925103  | 84472609 | G  | ADD  | 6979  | 0.877    | 0.2251   | 0.5642 | 1.363  | -0.5829   | 0.56     |
| 16  | rs34318854 | 84472707 | C  | ADD  | 7058  | 1.025    | 0.03612  | 0.9549 | 1.1    | 0.6814    | 0.4956   |
| 16  | rs34723871 | 84472711 | C  | ADD  | 7058  | 1.025    | 0.03612  | 0.9549 | 1.1    | 0.6814    | 0.4956   |
| 16  | rs56143130 | 84472719 | C  | ADD  | 7058  | 1.025    | 0.03612  | 0.9549 | 1.1    | 0.6814    | 0.4956   |
| 16  | rs9925282  | 84472806 | O  | ADD  | 7293  | NA       | NA       | NA     | NA     | NA        | NA       |
| 16  | rs9931862  | 84472878 | T  | ADD  | 7066  | 1.097    | 0.04407  | 1.006  | 1.196  | 2.098     | 0.03592  |
| 16  | rs9931687  | 84473282 | A  | ADD  | 7274  | 1.118    | 0.04362  | 1.026  | 1.218  | 2.558     | 0.01053  |
| 16  | rs6540231  | 84473561 | G  | ADD  | 7251  | 1.013    | 0.03564  | 0.9445 | 1.086  | 0.3568    | 0.7213   |
| 16  | 84473745   | 84473745 | O  | ADD  | 6320  | NA       | NA       | NA     | NA     | NA        | NA       |
| 16  | 84474001   | 84474001 | C  | ADD  | 6306  | 0.961    | 0.04486  | 0.8801 | 1.049  | -0.887    | 0.3751   |
| 16  | 84474531   | 84474531 | C  | ADD  | 6611  | 0.9217   | 0.8622   | 0.1701 | 4.995  | -0.09455  | 0.9247   |
| 16  | rs367170   | 84474588 | A  | ADD  | 4763  | 1.228    | 0.09978  | 1.01   | 1.494  | 2.061     | 0.03934  |
| 16  | rs409219   | 84474592 | T  | ADD  | 4690  | 1.408    | 0.1227   | 1.107  | 1.791  | 2.789     | 0.005281 |
| 16  | 84474714   | 84474714 | C  | ADD  | 4979  | 1.049    | 0.05793  | 0.9365 | 1.175  | 0.8284    | 0.4074   |
| 16  | rs62052475 | 84474717 | C  | ADD  | 4988  | 1.051    | 0.05777  | 0.9384 | 1.177  | 0.8601    | 0.3898   |
| 16  | 84474721   | 84474721 | C  | ADD  | 5659  | 1.057    | 0.1595   | 0.7735 | 1.445  | 0.3499    | 0.7264   |
| 16  | rs426900   | 84474799 | C  | ADD  | 6665  | 0.9375   | 0.07582  | 0.808  | 1.088  | -0.8515   | 0.3945   |
| 16  | rs9937847  | 84475052 | C  | ADD  | 7279  | 0.9897   | 0.06681  | 0.8682 | 1.128  | -0.1556   | 0.8763   |
| 16  | rs16939877 | 84475320 | A  | ADD  | 6718  | 0.8448   | 0.1116   | 0.6788 | 1.051  | -1.512    | 0.1306   |
| 16  | rs376783   | 84475324 | A  | ADD  | 7286  | 1.13     | 0.04116  | 1.042  | 1.225  | 2.97      | 0.002977 |
| 16  | rs428578   | 84475445 | G  | ADD  | 7188  | 1.02     | 0.0367   | 0.9493 | 1.096  | 0.5411    | 0.5884   |
| 16  | 84475528   | 84475528 | A  | ADD  | 6933  | 0.7472   | 0.2021   | 0.5028 | 1.11   | -1.442    | 0.1494   |
| 16  | rs371800   | 84475621 | T  | ADD  | 7264  | 1.194    | 0.09126  | 0.9988 | 1.428  | 1.947     | 0.05153  |
| 16  | rs447377   | 84476336 | G  | ADD  | 7260  | 1.016    | 0.03655  | 0.946  | 1.092  | 0.4423    | 0.6582   |
| 16  | rs9936406  | 84476343 | T  | ADD  | 7287  | 0.984    | 0.03758  | 0.9142 | 1.059  | -0.428    | 0.6687   |
| 16  | 84476544   | 84476544 | C  | ADD  | 7224  | 0.9748   | 0.06972  | 0.8503 | 1.118  | -0.3663   | 0.7142   |
| 16  | rs439390   | 84476707 | G  | ADD  | 7045  | 1.003    | 0.03712  | 0.9322 | 1.078  | 0.06788   | 0.9459   |
| 16  | 84476754   | 84476754 | C  | ADD  | 7249  | 0.7252   | 0.07577  | 0.6251 | 0.8413 | -4.24     | 2.24E-05 |
| 16  | rs9928868  | 84476971 | C  | ADD  | 7253  | 1.037    | 0.5444   | 0.3567 | 3.014  | 0.06635   | 0.9471   |
| 16  | rs384915   | 84477113 | A  | ADD  | 7234  | 1.16     | 0.09372  | 0.9653 | 1.394  | 1.584     | 0.1133   |
| 16  | 84477167   | 84477167 | C  | ADD  | 4644  | 0.8792   | 0.07385  | 0.7608 | 1.016  | -1.743    | 0.08139  |
| 16  | 84477725   | 84477725 | A  | ADD  | 7284  | 3.743    | 1.279    | 0.3051 | 45.93  | 1.032     | 0.3021   |
| 16  | rs438968   | 84477729 | C  | ADD  | 7242  | 1.012    | 0.03645  | 0.9425 | 1.087  | 0.3357    | 0.7371   |
| 16  | rs12596376 | 84477898 | C  | ADD  | 7166  | 0.9821   | 0.04023  | 0.9076 | 1.063  | -0.4493   | 0.6532   |
| 16  | rs370703   | 84477981 | T  | ADD  | 7283  | 1.014    | 0.03643  | 0.944  | 1.089  | 0.3772    | 0.7061   |
| 16  | 84478065   | 84478065 | G  | ADD  | 7266  | 0.6296   | 0.7932   | 0.133  | 2.98   | -0.5832   | 0.5598   |
| 16  | rs395922   | 84478180 | C  | ADD  | 6920  | 1.115    | 0.09511  | 0.9252 | 1.343  | 1.143     | 0.2531   |
| 16  | rs6540232  | 84478303 | C  | ADD  | 7194  | 0.9884   | 0.03771  | 0.918  | 1.064  | -0.3092   | 0.7572   |
| 16  | 84478601   | 84478601 | C  | ADD  | 7266  | 1.185    | 0.09498  | 0.9837 | 1.427  | 1.787     | 0.074    |
| 16  | rs448136   | 84478848 | C  | ADD  | 6904  | 0.9952   | 0.03663  | 0.9263 | 1.069  | -0.13     | 0.8965   |
| 16  | 84478905   | 84478905 | C  | ADD  | 7288  | 0.739    | 0.2974   | 0.4126 | 1.324  | -1.017    | 0.3092   |
| 16  | rs11642286 | 84479110 | G  | ADD  | 7290  | 0.7277   | 0.07397  | 0.6295 | 0.8412 | -4.297    | 1.73E-05 |
| 16  | rs391821   | 84479528 | T  | ADD  | 7013  | 1.058    | 0.09566  | 0.8771 | 1.276  | 0.589     | 0.5558   |
| 16  | rs428530   | 84480360 | G  | ADD  | 7237  | 1.178    | 0.09183  | 0.9836 | 1.41   | 1.78      | 0.07511  |
| 16  | rs11866609 | 84480582 | G  | ADD  | 7291  | 1.537    | 0.3898   | 0.716  | 3.3    | 1.103     | 0.27     |
| 16  | rs421710   | 84481015 | C  | ADD  | 7289  | 1.011    | 0.03641  | 0.9411 | 1.085  | 0.2924    | 0.77     |

| CHR | SNP        | BP       | A1 | TEST | NMISS | OR       | SE       | L95    | U95    | STAT     | P        |
|-----|------------|----------|----|------|-------|----------|----------|--------|--------|----------|----------|
| 16  | rs9308363  | 84481566 | C  | ADD  | 7248  | 0.9823   | 0.03725  | 0.9132 | 1.057  | -0.4789  | 0.632    |
| 16  | 84481963   | 84481963 | A  | ADD  | 6797  | 0.7809   | 0.3307   | 0.4084 | 1.493  | -0.748   | 0.4544   |
| 16  | rs433322   | 84482073 | G  | ADD  | 7227  | 1.013    | 0.0364   | 0.943  | 1.088  | 0.349    | 0.7271   |
| 16  | rs11860464 | 84482464 | T  | ADD  | 7151  | 1.269    | 0.5738   | 0.412  | 3.906  | 0.4148   | 0.6783   |
| 16  | 84482479   | 84482479 | C  | ADD  | 7238  | 0.9845   | 0.03729  | 0.9151 | 1.059  | -0.4191  | 0.6752   |
| 16  | 84482626   | 84482626 | O  | ADD  | 7018  | NA       | NA       | NA     | NA     | NA       | NA       |
| 16  | rs401528   | 84482872 | G  | ADD  | 7211  | 1.2      | 0.08921  | 1.008  | 1.429  | 2.045    | 0.04086  |
| 16  | rs7193803  | 84483174 | G  | ADD  | 7289  | 0.9827   | 0.0373   | 0.9134 | 1.057  | -0.4668  | 0.6407   |
| 16  | 84483336   | 84483336 | O  | ADD  | 7281  | NA       | NA       | NA     | NA     | NA       | NA       |
| 16  | rs11117411 | 84483439 | T  | ADD  | 7208  | 0.7254   | 0.07536  | 0.6258 | 0.8409 | -4.26    | 2.05E-05 |
| 16  | rs437740   | 84483537 | C  | ADD  | 7267  | 1.168    | 0.09274  | 0.9737 | 1.401  | 1.673    | 0.09441  |
| 16  | 84483596   | 84483596 | A  | ADD  | 7089  | 0.7238   | 0.2061   | 0.4832 | 1.084  | -1.568   | 0.1168   |
| 16  | rs438323   | 84483902 | C  | ADD  | 7265  | 1.171    | 0.09283  | 0.9765 | 1.405  | 1.704    | 0.08837  |
| 16  | rs12922615 | 84484196 | T  | ADD  | 7193  | 0.9445   | 0.07076  | 0.8222 | 1.085  | -0.8072  | 0.4196   |
| 16  | rs394100   | 84484220 | A  | ADD  | 7116  | 1.152    | 0.08973  | 0.9661 | 1.373  | 1.575    | 0.1152   |
| 16  | rs395498   | 84484222 | G  | ADD  | 7201  | 1.02     | 0.03652  | 0.9496 | 1.096  | 0.5439   | 0.5865   |
| 16  | rs452478   | 84484245 | G  | ADD  | 7264  | 1.165    | 0.09271  | 0.971  | 1.397  | 1.643    | 0.1004   |
| 16  | rs452532   | 84484267 | G  | ADD  | 7263  | 1.17     | 0.09283  | 0.9756 | 1.404  | 1.693    | 0.09037  |
| 16  | rs11117412 | 84484343 | A  | ADD  | 6986  | 1.001    | 0.041    | 0.9239 | 1.085  | 0.02902  | 0.9769   |
| 16  | rs434216   | 84484514 | C  | ADD  | 6954  | 1.012    | 0.03676  | 0.9413 | 1.087  | 0.3138   | 0.7536   |
| 16  | rs1809094  | 84484727 | A  | ADD  | 6603  | 1.05     | 0.04361  | 0.9644 | 1.144  | 1.129    | 0.259    |
| 16  | 84484809   | 84484809 | G  | ADD  | 7153  | 1.588    | 0.3786   | 0.756  | 3.335  | 1.221    | 0.222    |
| 16  | rs572967   | 84484995 | G  | ADD  | 7142  | 0.9955   | 0.03713  | 0.9256 | 1.071  | -0.1206  | 0.904    |
| 16  | rs896263   | 84485020 | G  | ADD  | 7286  | 1.079    | 0.03952  | 0.9986 | 1.166  | 1.925    | 0.05424  |
| 16  | rs403605   | 84485129 | A  | ADD  | 7279  | 0.9573   | 0.06021  | 0.8507 | 1.077  | -0.7254  | 0.4682   |
| 16  | rs454128   | 84485236 | G  | ADD  | 6933  | 1.015    | 0.04043  | 0.9378 | 1.099  | 0.3711   | 0.7106   |
| 16  | rs391023   | 84485315 | T  | ADD  | 7240  | 1.037    | 0.03648  | 0.9658 | 1.114  | 1.006    | 0.3146   |
| 16  | rs375288   | 84485372 | A  | ADD  | 7184  | 1.008    | 0.03742  | 0.937  | 1.085  | 0.2213   | 0.8248   |
| 16  | rs446836   | 84485520 | T  | ADD  | 6992  | 0.798    | 0.3248   | 0.4222 | 1.508  | -0.6948  | 0.4872   |
| 16  | rs873616   | 84485667 | G  | ADD  | 6977  | 1.123    | 0.04548  | 1.027  | 1.227  | 2.542    | 0.01103  |
| 16  | 84485701   | 84485701 | O  | ADD  | 7292  | NA       | NA       | NA     | NA     | NA       | NA       |
| 16  | rs60241040 | 84486065 | G  | ADD  | 7218  | 1.112    | 0.04448  | 1.019  | 1.214  | 2.391    | 0.01678  |
| 16  | rs391855   | 84486122 | T  | ADD  | 7282  | 1.019    | 0.03554  | 0.95   | 1.092  | 0.5177   | 0.6046   |
| 16  | rs12149363 | 84486206 | G  | ADD  | 7223  | 0.9409   | 0.07058  | 0.8193 | 1.08   | -0.8634  | 0.3879   |
| 16  | rs386098   | 84486701 | A  | ADD  | 7115  | 0.9566   | 0.06907  | 0.8355 | 1.095  | -0.6427  | 0.5205   |
| 16  | rs369173   | 84486783 | G  | ADD  | 7287  | 1.01     | 0.03538  | 0.9419 | 1.082  | 0.2697   | 0.7874   |
| 16  | rs398114   | 84486785 | C  | ADD  | 7075  | 1.015    | 0.03592  | 0.9459 | 1.089  | 0.4107   | 0.6813   |
| 16  | rs369597   | 84486935 | C  | ADD  | 7277  | 0.9521   | 0.06877  | 0.8321 | 1.089  | -0.7134  | 0.4756   |
| 16  | rs9924391  | 84487331 | T  | ADD  | 7285  | 0.9333   | 0.06963  | 0.8142 | 1.07   | -0.9919  | 0.3212   |
| 16  | rs9932449  | 84487333 | A  | ADD  | 7283  | 0.9439   | 0.06867  | 0.825  | 1.08   | -0.8413  | 0.4002   |
| 16  | rs371391   | 84487395 | C  | ADD  | 7283  | 0.9569   | 0.06894  | 0.836  | 1.095  | -0.6388  | 0.523    |
| 16  | rs388405   | 84487398 | A  | ADD  | 7291  | 0.9425   | 0.0684   | 0.8242 | 1.078  | -0.8665  | 0.3862   |
| 16  | rs28368111 | 84487756 | C  | ADD  | 7254  | 1.506    | 0.4032   | 0.6834 | 3.319  | 1.016    | 0.3097   |
| 16  | 84487779   | 84487779 | T  | ADD  | 7237  | 1.03E+09 | 1.72E+04 | 0      | inf    | 0.001204 | 0.999    |
| 16  | rs381139   | 84487901 | C  | ADD  | 7188  | 0.9405   | 0.06981  | 0.8202 | 1.078  | -0.8785  | 0.3797   |
| 16  | rs393512   | 84488072 | C  | ADD  | 7231  | 0.9229   | 0.06835  | 0.8072 | 1.055  | -1.173   | 0.2407   |
| 16  | rs416515   | 84488175 | C  | ADD  | 7223  | 0.9381   | 0.07005  | 0.8177 | 1.076  | -0.9128  | 0.3613   |
| 16  | rs398229   | 84488191 | A  | ADD  | 7223  | 0.9381   | 0.07005  | 0.8177 | 1.076  | -0.9128  | 0.3613   |
| 16  | 84488361   | 84488361 | C  | ADD  | 1949  | 1.17     | 0.1231   | 0.9197 | 1.49   | 1.279    | 0.2008   |
| 16  | 84488362   | 84488362 | C  | ADD  | 3711  | 1.028    | 0.12     | 0.8128 | 1.301  | 0.2327   | 0.816    |
| 16  | rs28368112 | 84488458 | C  | ADD  | 6906  | 1.118    | 0.04471  | 1.025  | 1.221  | 2.501    | 0.01237  |
| 16  | 84488780   | 84488780 | C  | ADD  | 7014  | 0.5613   | 0.3276   | 0.2954 | 1.067  | -1.763   | 0.07794  |
| 16  | rs170033   | 84489005 | A  | ADD  | 6600  | 0.9789   | 0.06697  | 0.8585 | 1.116  | -0.3181  | 0.7504   |



| CHR | SNP        | BP       | A1 | TEST | NMISS | OR     | SE      | L95    | U95    | STAT      | P        |
|-----|------------|----------|----|------|-------|--------|---------|--------|--------|-----------|----------|
| 16  | 84489382   | 84489382 | O  | ADD  | 7292  | NA     | NA      | NA     | NA     | NA        | NA       |
| 16  | rs4843859  | 84489457 | G  | ADD  | 7215  | 1.102  | 0.04332 | 1.012  | 1.199  | 2.235     | 0.02541  |
| 16  | rs8058349  | 84489530 | G  | ADD  | 7262  | 0.8852 | 0.0713  | 0.7698 | 1.018  | -1.71     | 0.08725  |
| 16  | rs191022   | 84489633 | G  | ADD  | 7171  | 1.063  | 0.03956 | 0.9837 | 1.149  | 1.545     | 0.1224   |
| 16  | rs188602   | 84489852 | T  | ADD  | 7158  | 0.9224 | 0.06987 | 0.8044 | 1.058  | -1.156    | 0.2478   |
| 16  | rs422186   | 84489971 | A  | ADD  | 7243  | 0.9153 | 0.07046 | 0.7972 | 1.051  | -1.257    | 0.2089   |
| 16  | rs56177354 | 84490153 | T  | ADD  | 6596  | 0.7592 | 0.3009  | 0.421  | 1.369  | -0.9158   | 0.3598   |
| 16  | rs2270501  | 84490489 | T  | ADD  | 7284  | 1.126  | 0.04482 | 1.031  | 1.229  | 2.646     | 0.008141 |
| 16  | rs2270502  | 84490539 | T  | ADD  | 7109  | 0.8954 | 0.07549 | 0.7722 | 1.038  | -1.464    | 0.1432   |
| 16  | 84490567   | 84490567 | O  | ADD  | 7284  | NA     | NA      | NA     | NA     | NA        | NA       |
| 16  | 84490724   | 84490724 | A  | ADD  | 7236  | 0.9954 | 1.07    | 0.1224 | 8.098  | -0.004269 | 0.9966   |
| 16  | 84491082   | 84491082 | A  | ADD  | 7206  | 1.255  | 0.09653 | 1.039  | 1.516  | 2.352     | 0.01866  |
| 16  | rs56196648 | 84491219 | A  | ADD  | 6520  | 1.124  | 0.1409  | 0.8526 | 1.481  | 0.8282    | 0.4076   |
| 16  | rs305084   | 84491669 | C  | ADD  | 7223  | 1.14   | 0.05908 | 1.016  | 1.28   | 2.221     | 0.02635  |
| 16  | rs12447817 | 84491725 | A  | ADD  | 5126  | 0.9815 | 0.1416  | 0.7437 | 1.295  | -0.1321   | 0.8949   |
| 16  | 84491886   | 84491886 | G  | ADD  | 7252  | 2.253  | 0.3864  | 1.056  | 4.804  | 2.102     | 0.03558  |
| 16  | 84491947   | 84491947 | O  | ADD  | 7293  | NA     | NA      | NA     | NA     | NA        | NA       |
| 16  | 84492016   | 84492016 | C  | ADD  | 7090  | 0.9295 | 0.07387 | 0.8042 | 1.074  | -0.9903   | 0.322    |
| 16  | rs1519978  | 84492712 | T  | ADD  | 7261  | 0.9417 | 0.0465  | 0.8597 | 1.032  | -1.291    | 0.1967   |
| 16  | rs16939906 | 84493007 | A  | ADD  | 7231  | 1.399  | 0.5732  | 0.4548 | 4.302  | 0.5854    | 0.5583   |
| 16  | 84493033   | 84493033 | C  | ADD  | 5791  | 0.779  | 0.2719  | 0.4572 | 1.327  | -0.9183   | 0.3585   |
| 16  | rs16882    | 84493074 | C  | ADD  | 7281  | 0.94   | 0.04639 | 0.8583 | 1.029  | -1.335    | 0.1819   |
| 16  | rs11649549 | 84493298 | C  | ADD  | 7272  | 0.9374 | 0.04642 | 0.8559 | 1.027  | -1.393    | 0.1637   |
| 16  | rs305083   | 84493379 | G  | ADD  | 7155  | 0.9273 | 0.04742 | 0.845  | 1.018  | -1.591    | 0.1115   |
| 16  | rs12924316 | 84493764 | T  | ADD  | 7287  | 1.111  | 0.04455 | 1.018  | 1.212  | 2.357     | 0.01844  |
| 16  | 84493893   | 84493893 | C  | ADD  | 4211  | 1.151  | 0.0623  | 1.019  | 1.301  | 2.26      | 0.02379  |
| 16  | 84493900   | 84493900 | C  | ADD  | 4274  | 1.153  | 0.06218 | 1.02   | 1.302  | 2.284     | 0.02238  |
| 16  | 84493903   | 84493903 | C  | ADD  | 4275  | 1.149  | 0.06216 | 1.017  | 1.298  | 2.236     | 0.02533  |
| 16  | 84493958   | 84493958 | C  | ADD  | 7268  | 1.582  | 0.4372  | 0.6715 | 3.726  | 1.049     | 0.2942   |
| 16  | 84494383   | 84494383 | T  | ADD  | 7122  | 0.9813 | 0.1934  | 0.6717 | 1.434  | -0.09766  | 0.9222   |
| 16  | rs305082   | 84494479 | C  | ADD  | 7283  | 0.9441 | 0.04615 | 0.8625 | 1.034  | -1.246    | 0.2129   |
| 16  | 84494689   | 84494689 | O  | ADD  | 7270  | NA     | NA      | NA     | NA     | NA        | NA       |
| 16  | 84494863   | 84494863 | C  | ADD  | 7255  | 1.294  | 0.0942  | 1.076  | 1.557  | 2.738     | 0.006189 |
| 16  | 84495087   | 84495087 | T  | ADD  | 7119  | 1.796  | 0.9674  | 0.2697 | 11.96  | 0.6055    | 0.5448   |
| 16  | rs182511   | 84495157 | G  | ADD  | 7290  | 1.126  | 0.1297  | 0.8736 | 1.452  | 0.9179    | 0.3587   |
| 16  | 84495288   | 84495288 | O  | ADD  | 6925  | NA     | NA      | NA     | NA     | NA        | NA       |
| 16  | 84495780   | 84495780 | A  | ADD  | 7272  | 1.45   | 1.081   | 0.1744 | 12.06  | 0.3438    | 0.731    |
| 16  | 84495918   | 84495918 | C  | ADD  | 4655  | 1.185  | 0.1615  | 0.8632 | 1.626  | 1.049     | 0.2943   |
| 16  | 84495937   | 84495937 | C  | ADD  | 5742  | 0.8872 | 0.1114  | 0.7132 | 1.104  | -1.075    | 0.2826   |
| 16  | 84495977   | 84495977 | C  | ADD  | 7009  | 0.9707 | 0.1869  | 0.6729 | 1.4    | -0.1592   | 0.8735   |
| 16  | rs11642583 | 84496096 | G  | ADD  | 7251  | 0.8529 | 0.0511  | 0.7717 | 0.9428 | -3.113    | 0.001852 |
| 16  | rs9940980  | 84496182 | T  | ADD  | 7289  | 0.8616 | 0.051   | 0.7797 | 0.9522 | -2.92     | 0.003496 |
| 16  | rs9926664  | 84496256 | G  | ADD  | 7267  | 0.861  | 0.05117 | 0.7789 | 0.9519 | -2.924    | 0.003457 |
| 16  | rs11646550 | 84496336 | A  | ADD  | 7240  | 0.8596 | 0.05135 | 0.7773 | 0.9506 | -2.947    | 0.003213 |
| 16  | 84496676   | 84496676 | O  | ADD  | 7282  | NA     | NA      | NA     | NA     | NA        | NA       |
| 16  | 84496724   | 84496724 | O  | ADD  | 7292  | NA     | NA      | NA     | NA     | NA        | NA       |
| 16  | 84496745   | 84496745 | C  | ADD  | 7004  | 1.473  | 1.081   | 0.1771 | 12.25  | 0.3584    | 0.72     |
| 16  | 84496751   | 84496751 | C  | ADD  | 7004  | 1.473  | 1.081   | 0.1771 | 12.25  | 0.3584    | 0.72     |
| 16  | rs3794662  | 84497151 | A  | ADD  | 7277  | 1.296  | 0.09372 | 1.078  | 1.557  | 2.765     | 0.005692 |
| 16  | 84497159   | 84497159 | O  | ADD  | 7285  | NA     | NA      | NA     | NA     | NA        | NA       |
| 16  | rs3794661  | 84497167 | A  | ADD  | 7253  | 1.257  | 0.09446 | 1.045  | 1.513  | 2.425     | 0.01531  |
| 16  | rs62052556 | 84497511 | T  | ADD  | 7206  | 0.8423 | 0.05213 | 0.7605 | 0.9329 | -3.293    | 0.000992 |
| 16  | 84497894   | 84497894 | G  | ADD  | 7184  | 0.9394 | 0.7319  | 0.2238 | 3.943  | -0.08543  | 0.9319   |

| CHR | SNP        | BP       | A1 | TEST | NMISS | OR     | SE      | L95     | U95    | STAT     | P         |
|-----|------------|----------|----|------|-------|--------|---------|---------|--------|----------|-----------|
| 16  | 84497914   | 84497914 | G  | ADD  | 7184  | 0.9394 | 0.7319  | 0.2238  | 3.943  | -0.08543 | 0.9319    |
| 16  | 84498477   | 84498477 | G  | ADD  | 7015  | 0.9495 | 0.1304  | 0.7353  | 1.226  | -0.3974  | 0.6911    |
| 16  | rs4843320  | 84498514 | T  | ADD  | 7152  | 1.093  | 0.04654 | 0.9977  | 1.197  | 1.911    | 0.05606   |
| 16  | 84498527   | 84498527 | A  | ADD  | 7103  | 0.9823 | 0.1934  | 0.6724  | 1.435  | -0.09209 | 0.9266    |
| 16  | 84498533   | 84498533 | T  | ADD  | 7017  | 0.971  | 0.2996  | 0.5397  | 1.747  | -0.09826 | 0.9217    |
| 16  | 84499184   | 84499184 | G  | ADD  | 7245  | 1.568  | 0.5042  | 0.5838  | 4.214  | 0.8926   | 0.3721    |
| 16  | rs305080   | 84499275 | T  | ADD  | 7205  | 1.014  | 0.0372  | 0.9424  | 1.09   | 0.3655   | 0.7148    |
| 16  | 84499414   | 84499414 | G  | ADD  | 7073  | 1.285  | 0.1836  | 0.8966  | 1.842  | 1.366    | 0.172     |
| 16  | rs10514610 | 84499676 | C  | ADD  | 7292  | 1.265  | 0.09051 | 1.059   | 1.511  | 2.597    | 0.009405  |
| 16  | rs16939917 | 84499921 | A  | ADD  | 7237  | 1.278  | 0.09075 | 1.07    | 1.527  | 2.702    | 0.006896  |
| 16  | rs305079   | 84499997 | C  | ADD  | 7282  | 1.309  | 0.08766 | 1.102   | 1.554  | 3.068    | 0.002156  |
| 16  | 84500417   | 84500417 | O  | ADD  | 7262  | NA     | NA      | NA      | NA     | NA       | NA        |
| 16  | rs305078   | 84500644 | G  | ADD  | 7262  | 2.775  | 0.5315  | 0.9794  | 7.865  | 1.921    | 0.05476   |
| 16  | rs3794660  | 84500669 | C  | ADD  | 7202  | 1.254  | 0.09713 | 1.037   | 1.517  | 2.333    | 0.01962   |
| 16  | 84500726   | 84500726 | T  | ADD  | 7102  | 0.9827 | 0.1934  | 0.6727  | 1.436  | -0.09009 | 0.9282    |
| 16  | rs305077   | 84500967 | C  | ADD  | 7287  | 1.03   | 0.0369  | 0.958   | 1.107  | 0.7976   | 0.4251    |
| 16  | 84501753   | 84501753 | O  | ADD  | 7286  | NA     | NA      | NA      | NA     | NA       | NA        |
| 16  | 84501767   | 84501767 | O  | ADD  | 7285  | NA     | NA      | NA      | NA     | NA       | NA        |
| 16  | 84501890   | 84501890 | O  | ADD  | 7293  | NA     | NA      | NA      | NA     | NA       | NA        |
| 16  | 84501918   | 84501918 | O  | ADD  | 7279  | NA     | NA      | NA      | NA     | NA       | NA        |
| 16  | rs391525   | 84501940 | G  | ADD  | 7282  | 1.028  | 0.0369  | 0.9562  | 1.105  | 0.7475   | 0.4548    |
| 16  | rs366304   | 84502301 | A  | ADD  | 7235  | 0.9202 | 0.5082  | 0.3399  | 2.492  | -0.1635  | 0.8701    |
| 16  | rs2292982  | 84502324 | G  | ADD  | 7287  | 1.033  | 0.03691 | 0.9612  | 1.111  | 0.8886   | 0.3742    |
| 16  | 84502367   | 84502367 | O  | ADD  | 7242  | NA     | NA      | NA      | NA     | NA       | NA        |
| 16  | rs2292980  | 84502577 | C  | ADD  | 7286  | 1.035  | 0.03691 | 0.9629  | 1.113  | 0.9362   | 0.3492    |
| 16  | 84502640   | 84502640 | A  | ADD  | 7291  | 1.958  | 0.7959  | 0.4115  | 9.318  | 0.8443   | 0.3985    |
| 16  | rs8052064  | 84502732 | T  | ADD  | 7115  | 0.8326 | 0.05238 | 0.7513  | 0.9226 | -3.498   | 0.0004685 |
| 16  | rs16939945 | 84502750 | T  | ADD  | 7253  | 0.841  | 0.1074  | 0.6813  | 1.038  | -1.612   | 0.1069    |
| 16  | 84502870   | 84502870 | T  | ADD  | 7291  | 0.9146 | 0.877   | 0.164   | 5.102  | -0.1017  | 0.919     |
| 16  | 84502888   | 84502888 | C  | ADD  | 7291  | 0.9146 | 0.877   | 0.164   | 5.102  | -0.1017  | 0.919     |
| 16  | rs1519976  | 84503176 | G  | ADD  | 7269  | 1.017  | 0.03536 | 0.9492  | 1.09   | 0.4841   | 0.6283    |
| 16  | rs768410   | 84503229 | G  | ADD  | 7274  | 1.017  | 0.03535 | 0.9492  | 1.09   | 0.4852   | 0.6275    |
| 16  | rs147968   | 84503340 | C  | ADD  | 7264  | 1.016  | 0.03537 | 0.9482  | 1.089  | 0.4568   | 0.6478    |
| 16  | 84503481   | 84503481 | O  | ADD  | 7290  | NA     | NA      | NA      | NA     | NA       | NA        |
| 16  | 84503489   | 84503489 | O  | ADD  | 7236  | NA     | NA      | NA      | NA     | NA       | NA        |
| 16  | rs925994   | 84503518 | A  | ADD  | 7266  | 1.285  | 0.09282 | 1.071   | 1.541  | 2.698    | 0.006981  |
| 16  | rs12923978 | 84503825 | C  | ADD  | 7159  | 1.157  | 0.04322 | 1.063   | 1.259  | 3.374    | 0.000742  |
| 16  | rs424971   | 84503951 | C  | ADD  | 7232  | 1.013  | 0.03553 | 0.9446  | 1.086  | 0.3564   | 0.7215    |
| 16  | rs11649318 | 84503982 | C  | ADD  | 7277  | 1.009  | 0.03603 | 0.9404  | 1.083  | 0.2557   | 0.7982    |
| 16  | rs11863590 | 84503995 | G  | ADD  | 7166  | 1.159  | 0.04319 | 1.065   | 1.262  | 3.42     | 0.0006269 |
| 16  | 84504494   | 84504494 | O  | ADD  | 7272  | NA     | NA      | NA      | NA     | NA       | NA        |
| 16  | 84504502   | 84504502 | O  | ADD  | 7286  | NA     | NA      | NA      | NA     | NA       | NA        |
| 16  | 84504605   | 84504605 | C  | ADD  | 6931  | 0.9656 | 0.05977 | 0.8588  | 1.086  | -0.586   | 0.5579    |
| 16  | 84504608   | 84504608 | T  | ADD  | 7284  | 1.274  | 0.5987  | 0.394   | 4.118  | 0.4042   | 0.6861    |
| 16  | 84504790   | 84504790 | O  | ADD  | 7293  | NA     | NA      | NA      | NA     | NA       | NA        |
| 16  | rs8051462  | 84504828 | G  | ADD  | 7263  | 1.019  | 0.03542 | 0.9507  | 1.092  | 0.5334   | 0.5938    |
| 16  | rs8064111  | 84504976 | T  | ADD  | 7169  | 0.8725 | 0.05418 | 0.7846  | 0.9703 | -2.517   | 0.01185   |
| 16  | rs8047999  | 84505028 | C  | ADD  | 7279  | 1.013  | 0.0354  | 0.9455  | 1.086  | 0.3766   | 0.7064    |
| 16  | 84505065   | 84505065 | C  | ADD  | 7266  | 0.6388 | 1.418   | 0.03968 | 10.28  | -0.3161  | 0.7519    |
| 16  | 84505099   | 84505099 | O  | ADD  | 7293  | NA     | NA      | NA      | NA     | NA       | NA        |
| 16  | 84505252   | 84505252 | A  | ADD  | 7147  | 1.237  | 0.1904  | 0.8516  | 1.796  | 1.116    | 0.2644    |
| 16  | rs903202   | 84505280 | C  | ADD  | 7176  | 1.01   | 0.0356  | 0.9418  | 1.083  | 0.2744   | 0.7838    |
| 16  | rs13331970 | 84505479 | A  | ADD  | 7266  | 1.062  | 0.3806  | 0.5038  | 2.24   | 0.1588   | 0.8739    |

| CHR | SNP        | BP       | A1 | TEST | NMISS | OR     | SE      | L95    | U95    | STAT    | P         |
|-----|------------|----------|----|------|-------|--------|---------|--------|--------|---------|-----------|
| 16  | rs17444416 | 84505599 | A  | ADD  | 7283  | 1.011  | 0.07457 | 0.8734 | 1.17   | 0.145   | 0.8847    |
| 16  | 84505753   | 84505753 | G  | ADD  | 7276  | 1.14   | 0.6086  | 0.3457 | 3.757  | 0.2148  | 0.8299    |
| 16  | rs11649271 | 84505830 | C  | ADD  | 7240  | 0.8424 | 0.05207 | 0.7606 | 0.9329 | -3.294  | 0.0009871 |
| 16  | 84505980   | 84505980 | O  | ADD  | 7291  | NA     | NA      | NA     | NA     | NA      | NA        |
| 16  | rs903203   | 84506142 | A  | ADD  | 6920  | 1.104  | 0.03814 | 1.025  | 1.19   | 2.605   | 0.009201  |
| 16  | 84506417   | 84506417 | T  | ADD  | 7283  | 1.136  | 0.6088  | 0.3446 | 3.747  | 0.2099  | 0.8338    |
| 16  | rs403038   | 84506572 | A  | ADD  | 7285  | 0.8396 | 0.05123 | 0.7594 | 0.9283 | -3.412  | 0.0006447 |
| 16  | rs8054513  | 84506608 | G  | ADD  | 7271  | 0.8384 | 0.0518  | 0.7575 | 0.928  | -3.403  | 0.0006657 |
| 16  | rs8059127  | 84506690 | A  | ADD  | 7276  | 1.08   | 0.3363  | 0.5589 | 2.088  | 0.2296  | 0.8184    |
| 16  | rs62052557 | 84506707 | A  | ADD  | 6819  | 0.711  | 0.4352  | 0.303  | 1.669  | -0.7837 | 0.4332    |
| 16  | rs305071   | 84506772 | A  | ADD  | 7025  | 0.8459 | 0.05517 | 0.7592 | 0.9425 | -3.034  | 0.002417  |
| 16  | rs28552575 | 84506805 | T  | ADD  | 7273  | 0.9508 | 0.4086  | 0.4268 | 2.118  | -0.1236 | 0.9017    |
| 16  | 84506880   | 84506880 | C  | ADD  | 7240  | 1.007  | 0.2438  | 0.6245 | 1.624  | 0.02935 | 0.9766    |
| 16  | rs305070   | 84506925 | G  | ADD  | 7282  | 0.8454 | 0.05029 | 0.7661 | 0.933  | -3.339  | 0.0008409 |
| 16  | rs9928776  | 84506960 | T  | ADD  | 7271  | 1.08   | 0.4051  | 0.4883 | 2.389  | 0.1901  | 0.8492    |
| 16  | rs16939967 | 84506974 | T  | ADD  | 7285  | 1.119  | 0.04643 | 1.022  | 1.226  | 2.426   | 0.01528   |
| 16  | rs305069   | 84507059 | C  | ADD  | 7127  | 1.015  | 0.03578 | 0.9461 | 1.089  | 0.4102  | 0.6817    |
| 16  | rs35819447 | 84507211 | G  | ADD  | 6992  | 1.47   | 1.081   | 0.1768 | 12.23  | 0.3566  | 0.7214    |
| 16  | 84507230   | 84507230 | O  | ADD  | 7293  | NA     | NA      | NA     | NA     | NA      | NA        |
| 16  | rs305068   | 84507397 | G  | ADD  | 7237  | 0.84   | 0.05187 | 0.7588 | 0.9299 | -3.361  | 0.0007765 |
| 16  | rs16939969 | 84507645 | C  | ADD  | 7281  | 0.9637 | 0.3079  | 0.5271 | 1.762  | -0.1202 | 0.9044    |
| 16  | rs28631400 | 84507948 | T  | ADD  | 7277  | 0.8125 | 0.3745  | 0.3899 | 1.693  | -0.5545 | 0.5792    |
| 16  | rs28407896 | 84507957 | T  | ADD  | 7277  | 0.8125 | 0.3745  | 0.3899 | 1.693  | -0.5545 | 0.5792    |
| 16  | 84508024   | 84508024 | O  | ADD  | 7293  | NA     | NA      | NA     | NA     | NA      | NA        |
| 16  | rs11117415 | 84508187 | G  | ADD  | 7280  | 1.227  | 0.07505 | 1.059  | 1.422  | 2.73    | 0.006343  |
| 16  | 84508204   | 84508204 | O  | ADD  | 7291  | NA     | NA      | NA     | NA     | NA      | NA        |
| 16  | rs4843860  | 84508422 | G  | ADD  | 7258  | 1.058  | 0.03871 | 0.9807 | 1.141  | 1.457   | 0.1452    |
| 16  | rs4843861  | 84508477 | T  | ADD  | 7284  | 1.058  | 0.03858 | 0.9809 | 1.141  | 1.459   | 0.1446    |
| 16  | rs9926067  | 84508696 | G  | ADD  | 7285  | 0.8739 | 0.3212  | 0.4657 | 1.64   | -0.4197 | 0.6747    |
| 16  | rs12926854 | 84508759 | G  | ADD  | 7244  | 1.055  | 0.03869 | 0.9782 | 1.138  | 1.391   | 0.1641    |
| 16  | rs8054065  | 84508855 | A  | ADD  | 7191  | 1.02   | 0.03531 | 0.9519 | 1.093  | 0.5634  | 0.5731    |
| 16  | 84508893   | 84508893 | O  | ADD  | 7158  | NA     | NA      | NA     | NA     | NA      | NA        |
| 16  | rs8046526  | 84509136 | T  | ADD  | 7280  | 0.8143 | 0.04844 | 0.7405 | 0.8954 | -4.242  | 2.22E-05  |
| 16  | rs9934699  | 84509137 | A  | ADD  | 7234  | 1.198  | 0.06725 | 1.05   | 1.366  | 2.683   | 0.007304  |
| 16  | rs9934701  | 84509148 | A  | ADD  | 7234  | 1.198  | 0.06725 | 1.05   | 1.366  | 2.683   | 0.007304  |
| 16  | rs9926411  | 84509158 | G  | ADD  | 7287  | 1.198  | 0.1272  | 0.9341 | 1.538  | 1.424   | 0.1545    |
| 16  | rs8058904  | 84509183 | G  | ADD  | 7269  | 0.8167 | 0.04855 | 0.7426 | 0.8982 | -4.171  | 3.03E-05  |
| 16  | rs9924484  | 84509239 | G  | ADD  | 7239  | 1.209  | 0.06719 | 1.06   | 1.379  | 2.828   | 0.00469   |
| 16  | rs9924488  | 84509249 | G  | ADD  | 7238  | 1.057  | 0.03857 | 0.9799 | 1.14   | 1.434   | 0.1516    |
| 16  | rs8064189  | 84509297 | G  | ADD  | 7175  | 0.9205 | 0.04182 | 0.848  | 0.9991 | -1.981  | 0.04758   |
| 16  | 84509524   | 84509524 | O  | ADD  | 6594  | NA     | NA      | NA     | NA     | NA      | NA        |
| 16  | 84509646   | 84509646 | O  | ADD  | 7113  | NA     | NA      | NA     | NA     | NA      | NA        |
| 16  | rs28368114 | 84509781 | A  | ADD  | 7063  | 0.6899 | 0.5963  | 0.2144 | 2.22   | -0.6226 | 0.5336    |
| 16  | rs61995933 | 84509816 | T  | ADD  | 7236  | 2.37   | 1.291   | 0.1887 | 29.77  | 0.6682  | 0.504     |
| 16  | 84510111   | 84510111 | O  | ADD  | 7293  | NA     | NA      | NA     | NA     | NA      | NA        |
| 16  | 84510173   | 84510173 | C  | ADD  | 7142  | 0.64   | 1.418   | 0.0397 | 10.32  | -0.3146 | 0.7531    |
| 16  | rs2280378  | 84510246 | G  | ADD  | 7258  | 1.01   | 0.03499 | 0.9435 | 1.082  | 0.2975  | 0.7661    |
| 16  | rs7185022  | 84510430 | A  | ADD  | 7227  | 0.9869 | 0.0354  | 0.9208 | 1.058  | -0.3712 | 0.7105    |
| 16  | rs13338943 | 84510452 | T  | ADD  | 7292  | 0.9692 | 0.05388 | 0.872  | 1.077  | -0.5812 | 0.5611    |
| 16  | rs12929551 | 84510511 | T  | ADD  | 7279  | 1.103  | 0.04621 | 1.007  | 1.207  | 2.119   | 0.03406   |
| 16  | 84510613   | 84510613 | T  | ADD  | 7270  | 6.79   | 0.7925  | 1.437  | 32.09  | 2.417   | 0.01565   |
| 16  | rs16939994 | 84510669 | G  | ADD  | 7271  | 1.136  | 0.1319  | 0.8771 | 1.471  | 0.9655  | 0.3343    |
| 16  | rs8057456  | 84510697 | T  | ADD  | 7080  | 1.027  | 0.03644 | 0.9559 | 1.103  | 0.7219  | 0.4703    |

| CHR | SNP        | BP       | A1 | TEST | NMISS | OR       | SE       | L95    | U95    | STAT       | P       |
|-----|------------|----------|----|------|-------|----------|----------|--------|--------|------------|---------|
| 16  | 84510714   | 84510714 | C  | ADD  | 7232  | 2.29E-09 | 2.44E+04 | 0      | inf    | -0.0008161 | 0.9993  |
| 16  | 84510896   | 84510896 | A  | ADD  | 6943  | 0.9837   | 0.1337   | 0.757  | 1.278  | -0.1225    | 0.9025  |
| 16  | 84510938   | 84510938 | O  | ADD  | 7264  | NA       | NA       | NA     | NA     | NA         | NA      |
| 16  | rs9927932  | 84510947 | T  | ADD  | 7292  | 1.621    | 0.3832   | 0.7652 | 3.436  | 1.261      | 0.2072  |
| 16  | rs11866752 | 84510994 | T  | ADD  | 7283  | 1.601    | 0.4258   | 0.6948 | 3.687  | 1.105      | 0.2693  |
| 16  | rs28368115 | 84511122 | T  | ADD  | 7259  | 1.065    | 0.1357   | 0.8162 | 1.39   | 0.464      | 0.6426  |
| 16  | rs16940005 | 84511183 | C  | ADD  | 7235  | 1.121    | 0.04665  | 1.023  | 1.229  | 2.457      | 0.01402 |
| 16  | 84511331   | 84511331 | O  | ADD  | 7293  | NA       | NA       | NA     | NA     | NA         | NA      |
| 16  | rs35593615 | 84511410 | G  | ADD  | 7262  | 1.112    | 0.04629  | 1.016  | 1.218  | 2.3        | 0.02145 |
| 16  | rs3751712  | 84511456 | C  | ADD  | 6625  | 0.9837   | 0.03746  | 0.914  | 1.059  | -0.4398    | 0.6601  |
| 16  | 84511483   | 84511483 | A  | ADD  | 5779  | 0.9154   | 0.2223   | 0.5921 | 1.415  | -0.3977    | 0.6908  |
| 16  | rs4843321  | 84511577 | C  | ADD  | 7103  | 0.9994   | 0.03638  | 0.9306 | 1.073  | -0.01786   | 0.9858  |
| 16  | 84511720   | 84511720 | G  | ADD  | 7288  | 9.156    | 1.101    | 1.058  | 79.2   | 2.012      | 0.04426 |
| 16  | rs16940007 | 84511788 | T  | ADD  | 7288  | 3.93E-10 | 2.44E+04 | 0      | inf    | -0.0008884 | 0.9993  |
| 16  | rs16940009 | 84512089 | C  | ADD  | 7289  | 2.387    | 0.4901   | 0.9135 | 6.239  | 1.775      | 0.07585 |
| 16  | 84512224   | 84512224 | T  | ADD  | 7291  | 1.26E+09 | 2.44E+04 | 0      | inf    | 0.0008596  | 0.9993  |
| 16  | rs2270503  | 84512302 | A  | ADD  | 7283  | 0.6601   | 0.9258   | 0.1075 | 4.052  | -0.4487    | 0.6536  |
| 16  | 84512462   | 84512462 | O  | ADD  | 7286  | NA       | NA       | NA     | NA     | NA         | NA      |
| 16  | 84512553   | 84512553 | O  | ADD  | 7291  | NA       | NA       | NA     | NA     | NA         | NA      |
| 16  | 84512648   | 84512648 | A  | ADD  | 7288  | 2.709    | 1.318    | 0.2047 | 35.86  | 0.7562     | 0.4495  |
| 16  | rs28368116 | 84512695 | C  | ADD  | 7237  | 0.6882   | 0.265    | 0.4094 | 1.157  | -1.41      | 0.1586  |
| 16  | rs10514611 | 84512743 | T  | ADD  | 7233  | 0.9123   | 0.04294  | 0.8387 | 0.9924 | -2.138     | 0.03252 |
| 16  | rs1568391  | 84512805 | G  | ADD  | 6993  | 1.009    | 0.03608  | 0.94   | 1.083  | 0.2465     | 0.8053  |
| 16  | rs305072   | 84513164 | G  | ADD  | 7278  | 1.021    | 0.1268   | 0.7963 | 1.309  | 0.1635     | 0.8701  |
| 16  | rs1044873  | 84513172 | A  | ADD  | 7167  | 1.001    | 0.0363   | 0.9323 | 1.075  | 0.02909    | 0.9768  |
| 16  | 84513230   | 84513230 | A  | ADD  | 6947  | 1.005    | 0.03608  | 0.9363 | 1.079  | 0.1353     | 0.8924  |
| 16  | 84513410   | 84513410 | G  | ADD  | 7282  | 0.6603   | 0.9258   | 0.1076 | 4.053  | -0.4484    | 0.6539  |
| 16  | rs28368119 | 84513449 | T  | ADD  | 7024  | 0.7298   | 0.2194   | 0.4747 | 1.122  | -1.436     | 0.1511  |
| 16  | 84513495   | 84513495 | O  | ADD  | 7293  | NA       | NA       | NA     | NA     | NA         | NA      |
| 16  | rs6638     | 84513545 | A  | ADD  | 6938  | 1.01     | 0.03609  | 0.9408 | 1.084  | 0.2684     | 0.7884  |
| 16  | 84513863   | 84513863 | C  | ADD  | 2091  | 0.9927   | 0.07005  | 0.8654 | 1.139  | -0.1045    | 0.9168  |
| 16  | rs11646027 | 84513898 | C  | ADD  | 7260  | 0.9223   | 0.04255  | 0.8485 | 1.003  | -1.9       | 0.05746 |
| 16  | rs28368120 | 84514144 | T  | ADD  | 7278  | 1.078    | 0.129    | 0.8374 | 1.388  | 0.5841     | 0.5591  |
| 16  | 84514396   | 84514396 | C  | ADD  | 6891  | 1.472    | 0.2081   | 0.979  | 2.214  | 1.858      | 0.06317 |
| 16  | rs7204286  | 84514422 | T  | ADD  | 7162  | 0.925    | 0.04279  | 0.8506 | 1.006  | -1.822     | 0.06839 |
| 16  | rs1021479  | 84514915 | C  | ADD  | 7275  | 1.097    | 0.1264   | 0.8565 | 1.406  | 0.7346     | 0.4626  |
| 16  | 84514923   | 84514923 | O  | ADD  | 7284  | NA       | NA       | NA     | NA     | NA         | NA      |
| 16  | rs305073   | 84515294 | T  | ADD  | 7192  | 1.021    | 0.03602  | 0.9513 | 1.096  | 0.5748     | 0.5654  |
| 16  | rs305074   | 84515321 | C  | ADD  | 7190  | 1.019    | 0.03583  | 0.9496 | 1.093  | 0.5153     | 0.6064  |
| 16  | rs9932835  | 84515425 | G  | ADD  | 7260  | 0.9262   | 0.04254  | 0.8521 | 1.007  | -1.802     | 0.0715  |
| 16  | rs11117416 | 84515825 | G  | ADD  | 7291  | 0.9259   | 0.04248  | 0.8519 | 1.006  | -1.812     | 0.07001 |
| 16  | 84516049   | 84516049 | O  | ADD  | 7186  | NA       | NA       | NA     | NA     | NA         | NA      |
| 16  | 84516201   | 84516201 | T  | ADD  | 7292  | 2.00E-09 | 2.44E+04 | 0      | inf    | -0.0008216 | 0.9993  |
| 16  | rs16940023 | 84516215 | T  | ADD  | 7278  | 1.063    | 0.1248   | 0.8324 | 1.358  | 0.4906     | 0.6237  |
| 16  | rs8052521  | 84516230 | A  | ADD  | 7281  | 0.9342   | 0.0412   | 0.8617 | 1.013  | -1.652     | 0.09856 |
| 16  | rs1021480  | 84516471 | G  | ADD  | 7204  | 0.9423   | 0.04146  | 0.8688 | 1.022  | -1.433     | 0.1519  |
| 16  | rs1021481  | 84516521 | A  | ADD  | 7280  | 0.9384   | 0.04126  | 0.8655 | 1.017  | -1.542     | 0.1231  |
| 16  | rs880364   | 84516666 | G  | ADD  | 7286  | 0.9418   | 0.04119  | 0.8688 | 1.021  | -1.455     | 0.1455  |
| 16  | rs880365   | 84516863 | T  | ADD  | 7289  | 0.9358   | 0.04127  | 0.863  | 1.015  | -1.609     | 0.1076  |
| 16  | rs880366   | 84516939 | C  | ADD  | 7288  | 0.9393   | 0.04118  | 0.8664 | 1.018  | -1.522     | 0.128   |
| 16  | 84517038   | 84517038 | O  | ADD  | 7272  | NA       | NA       | NA     | NA     | NA         | NA      |
| 16  | 84517061   | 84517061 | O  | ADD  | 7267  | NA       | NA       | NA     | NA     | NA         | NA      |
| 16  | 84517099   | 84517099 | O  | ADD  | 7293  | NA       | NA       | NA     | NA     | NA         | NA      |

| CHR | SNP        | BP       | A1 | TEST | NMISS | OR       | SE       | L95     | U95    | STAT      | P         |
|-----|------------|----------|----|------|-------|----------|----------|---------|--------|-----------|-----------|
| 16  | rs305075   | 84517136 | T  | ADD  | 7281  | 1.008    | 0.03552  | 0.9404  | 1.081  | 0.2301    | 0.818     |
| 16  | 84517710   | 84517710 | O  | ADD  | 7290  | NA       | NA       | NA      | NA     | NA        | NA        |
| 16  | rs11644411 | 84517732 | C  | ADD  | 7219  | 0.927    | 0.04265  | 0.8527  | 1.008  | -1.776    | 0.07568   |
| 16  | rs11648480 | 84517780 | T  | ADD  | 7232  | 0.9291   | 0.04264  | 0.8546  | 1.01   | -1.725    | 0.08448   |
| 16  | 84517870   | 84517870 | A  | ADD  | 7084  | 1.199    | 0.1331   | 0.9238  | 1.556  | 1.364     | 0.1725    |
| 16  | 84517901   | 84517901 | C  | ADD  | 7278  | 0.4056   | 0.566    | 0.1338  | 1.23   | -1.594    | 0.1109    |
| 16  | rs1472235  | 84518468 | A  | ADD  | 7146  | 0.9476   | 0.03907  | 0.8778  | 1.023  | -1.377    | 0.1685    |
| 16  | 84518535   | 84518535 | T  | ADD  | 6843  | 0.7196   | 0.5074   | 0.2662  | 1.945  | -0.6486   | 0.5166    |
| 16  | rs1038953  | 84518591 | A  | ADD  | 6804  | 1.394    | 0.2868   | 0.7946  | 2.445  | 1.158     | 0.2469    |
| 16  | 84518682   | 84518682 | A  | ADD  | 7218  | 1.565    | 0.5042   | 0.5824  | 4.203  | 0.8877    | 0.3747    |
| 16  | 84518866   | 84518866 | C  | ADD  | 7212  | 2.055    | 1.157    | 0.213   | 19.83  | 0.6228    | 0.5334    |
| 16  | rs4843862  | 84518960 | G  | ADD  | 5477  | 0.9913   | 0.04137  | 0.9141  | 1.075  | -0.2104   | 0.8334    |
| 16  | rs17444745 | 84519063 | A  | ADD  | 7288  | 0.9651   | 0.04655  | 0.8809  | 1.057  | -0.7634   | 0.4452    |
| 16  | 84519295   | 84519295 | T  | ADD  | 7290  | 9.149    | 1.101    | 1.058   | 79.14  | 2.011     | 0.04434   |
| 16  | 84519403   | 84519403 | G  | ADD  | 7217  | 1.136    | 0.3352   | 0.5887  | 2.191  | 0.3797    | 0.7042    |
| 16  | 84519498   | 84519498 | G  | ADD  | 7283  | 0.4952   | 0.8908   | 0.08641 | 2.838  | -0.7889   | 0.4302    |
| 16  | 84519800   | 84519800 | C  | ADD  | 7273  | 2.186    | 0.8622   | 0.4035  | 11.85  | 0.9072    | 0.3643    |
| 16  | rs305076   | 84519862 | C  | ADD  | 7269  | 6.247    | 1.153    | 0.652   | 59.86  | 1.589     | 0.112     |
| 16  | 84520081   | 84520081 | O  | ADD  | 7283  | NA       | NA       | NA      | NA     | NA        | NA        |
| 16  | 84520237   | 84520237 | C  | ADD  | 7280  | 1.768    | 1.157    | 0.1832  | 17.07  | 0.4928    | 0.6221    |
| 16  | 84520351   | 84520351 | C  | ADD  | 6511  | 1.092    | 0.09666  | 0.9039  | 1.32   | 0.9152    | 0.3601    |
| 16  | 84520516   | 84520516 | A  | ADD  | 6497  | 1.094    | 0.09568  | 0.9071  | 1.32   | 0.941     | 0.3467    |
| 16  | 84520518   | 84520518 | O  | ADD  | 7286  | NA       | NA       | NA      | NA     | NA        | NA        |
| 16  | 84520604   | 84520604 | O  | ADD  | 7293  | NA       | NA       | NA      | NA     | NA        | NA        |
| 16  | 84521376   | 84521376 | T  | ADD  | 6961  | 1.758    | 0.2917   | 0.9923  | 3.114  | 1.933     | 0.05318   |
| 16  | 84521433   | 84521433 | O  | ADD  | 7293  | NA       | NA       | NA      | NA     | NA        | NA        |
| 16  | 84521580   | 84521580 | G  | ADD  | 7263  | 5.445    | 0.7973   | 1.141   | 25.98  | 2.126     | 0.03354   |
| 16  | 84521632   | 84521632 | T  | ADD  | 7197  | 0.6605   | 1.221    | 0.06032 | 7.232  | -0.3397   | 0.7341    |
| 16  | 84521737   | 84521737 | O  | ADD  | 7293  | NA       | NA       | NA      | NA     | NA        | NA        |
| 16  | rs12598785 | 84521809 | G  | ADD  | 7236  | 0.9835   | 0.05175  | 0.8887  | 1.089  | -0.3206   | 0.7485    |
| 16  | rs60218704 | 84521854 | C  | ADD  | 7269  | 9.172    | 1.101    | 1.059   | 79.41  | 2.012     | 0.04417   |
| 16  | rs8045988  | 84521891 | A  | ADD  | 7289  | 1.215    | 0.0656   | 1.068   | 1.381  | 2.963     | 0.003047  |
| 16  | rs366078   | 84522064 | C  | ADD  | 7271  | 0.8311   | 0.05734  | 0.7428  | 0.93   | -3.226    | 0.001254  |
| 16  | rs2172625  | 84522286 | C  | ADD  | 7137  | 0.8151   | 0.05845  | 0.7269  | 0.914  | -3.498    | 0.0004691 |
| 16  | rs2970094  | 84522327 | A  | ADD  | 6790  | 0.8362   | 0.05764  | 0.7469  | 0.9362 | -3.103    | 0.001915  |
| 16  | 84522420   | 84522420 | A  | ADD  | 7225  | 0.7236   | 1.423    | 0.04453 | 11.76  | -0.2274   | 0.8201    |
| 16  | 84522462   | 84522462 | O  | ADD  | 7284  | NA       | NA       | NA      | NA     | NA        | NA        |
| 16  | rs399280   | 84522499 | G  | ADD  | 7151  | 0.8599   | 0.05756  | 0.7682  | 0.9626 | -2.622    | 0.008744  |
| 16  | rs383425   | 84522540 | T  | ADD  | 7274  | 1.073    | 0.03672  | 0.9985  | 1.153  | 1.92      | 0.05485   |
| 16  | 84522577   | 84522577 | C  | ADD  | 7264  | 0.8475   | 0.05769  | 0.7569  | 0.9489 | -2.869    | 0.004123  |
| 16  | 84522585   | 84522585 | C  | ADD  | 7032  | 1.727    | 0.3651   | 0.8447  | 3.533  | 1.497     | 0.1343    |
| 16  | rs56200928 | 84522852 | C  | ADD  | 6987  | 1.615    | 0.1866   | 1.12    | 2.328  | 2.569     | 0.01021   |
| 16  | 84522867   | 84522867 | O  | ADD  | 7293  | NA       | NA       | NA      | NA     | NA        | NA        |
| 16  | 84522980   | 84522980 | A  | ADD  | 7279  | 1.604    | 1.554    | 0.0763  | 33.72  | 0.3041    | 0.7611    |
| 16  | rs523642   | 84523096 | A  | ADD  | 7251  | 0.8488   | 0.05784  | 0.7578  | 0.9507 | -2.834    | 0.004593  |
| 16  | rs524432   | 84523155 | C  | ADD  | 7290  | 0.8518   | 0.05728  | 0.7613  | 0.953  | -2.801    | 0.005097  |
| 16  | 84523165   | 84523165 | A  | ADD  | 7284  | 0.669    | 0.2854   | 0.3824  | 1.17   | -1.408    | 0.159     |
| 16  | 84523216   | 84523216 | T  | ADD  | 7279  | 4.24E+09 | 2.44E+04 | 0       | inf    | 0.0009093 | 0.9993    |
| 16  | rs388988   | 84523302 | T  | ADD  | 7238  | 0.8439   | 0.05733  | 0.7542  | 0.9442 | -2.961    | 0.003065  |
| 16  | 84523320   | 84523320 | O  | ADD  | 7286  | NA       | NA       | NA      | NA     | NA        | NA        |
| 16  | rs73266819 | 84523372 | C  | ADD  | 7282  | 0.9734   | 0.7936   | 0.2055  | 4.611  | -0.03402  | 0.9729    |
| 16  | 84523433   | 84523433 | C  | ADD  | 7030  | 0.8245   | 0.05988  | 0.7332  | 0.9271 | -3.224    | 0.001266  |
| 16  | rs411221   | 84523460 | C  | ADD  | 7123  | 0.8365   | 0.0584   | 0.746   | 0.9379 | -3.057    | 0.002236  |

| CHR | SNP        | BP       | A1 | TEST | NMISS | OR       | SE       | L95    | U95    | STAT     | P         |
|-----|------------|----------|----|------|-------|----------|----------|--------|--------|----------|-----------|
| 16  | 84523472   | 84523472 | 0  | ADD  | 7293  | NA       | NA       | NA     | NA     | NA       | NA        |
| 16  | 84523510   | 84523510 | 0  | ADD  | 7284  | NA       | NA       | NA     | NA     | NA       | NA        |
| 16  | rs878453   | 84523664 | C  | ADD  | 7021  | 1.011    | 0.03611  | 0.9416 | 1.085  | 0.2922   | 0.7701    |
| 16  | rs878454   | 84523673 | A  | ADD  | 7263  | 1.029    | 0.04066  | 0.9503 | 1.114  | 0.7053   | 0.4806    |
| 16  | rs903201   | 84523785 | C  | ADD  | 7200  | 0.9749   | 0.0529   | 0.8788 | 1.081  | -0.4813  | 0.6303    |
| 16  | rs11861479 | 84523794 | G  | ADD  | 7202  | 0.9743   | 0.0529   | 0.8783 | 1.081  | -0.4922  | 0.6225    |
| 16  | rs11117417 | 84523830 | T  | ADD  | 7204  | 0.9769   | 0.05291  | 0.8806 | 1.084  | -0.4423  | 0.6583    |
| 16  | rs58980382 | 84523934 | T  | ADD  | 7011  | 0.7791   | 0.06296  | 0.6887 | 0.8814 | -3.965   | 7.35E-05  |
| 16  | rs11860480 | 84523959 | C  | ADD  | 7277  | 0.8967   | 0.04068  | 0.828  | 0.9711 | -2.68    | 0.007369  |
| 16  | rs11860517 | 84524000 | G  | ADD  | 7271  | 0.9846   | 0.05242  | 0.8885 | 1.091  | -0.2953  | 0.7678    |
| 16  | rs11117418 | 84524028 | G  | ADD  | 7269  | 0.9576   | 0.04957  | 0.8689 | 1.055  | -0.874   | 0.3821    |
| 16  | rs12051539 | 84524038 | G  | ADD  | 7176  | 1.193    | 0.1523   | 0.8848 | 1.607  | 1.156    | 0.2475    |
| 16  | 84524043   | 84524043 | A  | ADD  | 7085  | 1.072    | 0.1249   | 0.8395 | 1.37   | 0.5594   | 0.5759    |
| 16  | 84524049   | 84524049 | G  | ADD  | 7137  | 0.791    | 0.06099  | 0.7018 | 0.8914 | -3.845   | 0.0001206 |
| 16  | 84524139   | 84524139 | 0  | ADD  | 7280  | NA       | NA       | NA     | NA     | NA       | NA        |
| 16  | rs13332649 | 84524184 | G  | ADD  | 7038  | 0.773    | 0.05013  | 0.7007 | 0.8528 | -5.136   | 2.81E-07  |
| 16  | rs875529   | 84524187 | C  | ADD  | 7256  | 0.9825   | 0.05246  | 0.8865 | 1.089  | -0.3371  | 0.736     |
| 16  | rs875528   | 84524211 | A  | ADD  | 7188  | 1.28     | 0.1495   | 0.955  | 1.716  | 1.652    | 0.0986    |
| 16  | 84524220   | 84524220 | T  | ADD  | 7167  | 0.8285   | 0.1853   | 0.5762 | 1.191  | -1.015   | 0.3102    |
| 16  | rs875527   | 84524231 | A  | ADD  | 7290  | 1.291    | 0.1502   | 0.9615 | 1.732  | 1.699    | 0.08937   |
| 16  | rs419030   | 84524302 | A  | ADD  | 7146  | 1.161    | 0.03883  | 1.076  | 1.253  | 3.848    | 0.0001189 |
| 16  | 84524389   | 84524389 | 0  | ADD  | 7292  | NA       | NA       | NA     | NA     | NA       | NA        |
| 16  | 84524454   | 84524454 | C  | ADD  | 6972  | 0.6059   | 0.8191   | 0.1217 | 3.017  | -0.6117  | 0.5407    |
| 16  | 84524516   | 84524516 | C  | ADD  | 7284  | 1.539    | 0.6129   | 0.4631 | 5.117  | 0.7038   | 0.4815    |
| 16  | rs12596341 | 84524541 | A  | ADD  | 7263  | 0.9352   | 0.05662  | 0.837  | 1.045  | -1.182   | 0.237     |
| 16  | rs7198271  | 84524586 | G  | ADD  | 7250  | 0.9017   | 0.5357   | 0.3156 | 2.577  | -0.1931  | 0.8469    |
| 16  | 84524664   | 84524664 | C  | ADD  | 6778  | 1.13     | 0.03723  | 1.051  | 1.216  | 3.286    | 0.001015  |
| 16  | 84524665   | 84524665 | C  | ADD  | 7113  | 1.131    | 0.0361   | 1.053  | 1.214  | 3.403    | 0.0006675 |
| 16  | 84524666   | 84524666 | C  | ADD  | 7113  | 1.131    | 0.0361   | 1.053  | 1.214  | 3.403    | 0.0006675 |
| 16  | 84524668   | 84524668 | C  | ADD  | 7079  | 1.133    | 0.0362   | 1.055  | 1.216  | 3.448    | 0.0005646 |
| 16  | 84524687   | 84524687 | C  | ADD  | 4145  | 0.7315   | 0.1371   | 0.5591 | 0.9569 | -2.281   | 0.02254   |
| 16  | 84524706   | 84524706 | C  | ADD  | 3209  | 0.8695   | 0.08964  | 0.7294 | 1.037  | -1.559   | 0.1189    |
| 16  | 84524707   | 84524707 | C  | ADD  | 2801  | 0.8463   | 0.1138   | 0.6772 | 1.058  | -1.466   | 0.1425    |
| 16  | 84524722   | 84524722 | C  | ADD  | 5976  | 0.9304   | 0.2161   | 0.6091 | 1.421  | -0.3338  | 0.7385    |
| 16  | 84524723   | 84524723 | C  | ADD  | 5947  | 0.9311   | 0.216    | 0.6097 | 1.422  | -0.3303  | 0.7412    |
| 16  | 84524750   | 84524750 | T  | ADD  | 7022  | 0.6435   | 0.1183   | 0.5103 | 0.8114 | -3.727   | 0.0001941 |
| 16  | rs12444221 | 84524786 | T  | ADD  | 7259  | 0.7904   | 0.04855  | 0.7186 | 0.8693 | -4.846   | 1.26E-06  |
| 16  | 84524997   | 84524997 | 0  | ADD  | 7234  | NA       | NA       | NA     | NA     | NA       | NA        |
| 16  | rs437291   | 84525009 | C  | ADD  | 7223  | 1.145    | 0.03574  | 1.067  | 1.228  | 3.785    | 0.0001539 |
| 16  | 84525054   | 84525054 | 0  | ADD  | 7290  | NA       | NA       | NA     | NA     | NA       | NA        |
| 16  | 84525087   | 84525087 | T  | ADD  | 6970  | 1.651    | 0.347    | 0.8361 | 3.259  | 1.444    | 0.1487    |
| 16  | rs9936079  | 84525095 | A  | ADD  | 6957  | 0.7809   | 0.04926  | 0.7091 | 0.8601 | -5.02    | 5.18E-07  |
| 16  | rs385344   | 84525105 | G  | ADD  | 7244  | 1.179    | 0.03868  | 1.093  | 1.272  | 4.25     | 2.13E-05  |
| 16  | rs447632   | 84525141 | G  | ADD  | 7273  | 1.132    | 0.03589  | 1.055  | 1.215  | 3.458    | 0.0005437 |
| 16  | rs34337659 | 84525158 | C  | ADD  | 7269  | 1.177    | 0.03858  | 1.091  | 1.269  | 4.219    | 2.45E-05  |
| 16  | rs66509440 | 84525182 | T  | ADD  | 6835  | 1.182    | 0.04133  | 1.09   | 1.282  | 4.054    | 5.05E-05  |
| 16  | rs66804793 | 84525190 | A  | ADD  | 6836  | 1.183    | 0.04133  | 1.091  | 1.282  | 4.06     | 4.92E-05  |
| 16  | rs9925859  | 84525223 | C  | ADD  | 7248  | 0.9874   | 0.03713  | 0.9181 | 1.062  | -0.342   | 0.7324    |
| 16  | rs74032085 | 84525245 | C  | ADD  | 6690  | 1.199    | 0.04218  | 1.104  | 1.303  | 4.312    | 1.62E-05  |
| 16  | rs16940044 | 84525266 | G  | ADD  | 6671  | 1.199    | 0.04234  | 1.104  | 1.303  | 4.295    | 1.75E-05  |
| 16  | 84525360   | 84525360 | G  | ADD  | 7143  | 3.78E-10 | 2.44E+04 | 0      | inf    | -0.00089 | 0.9993    |
| 16  | rs2934497  | 84525379 | T  | ADD  | 6646  | 1.223    | 0.04282  | 1.125  | 1.33   | 4.704    | 2.55E-06  |
| 16  | rs2970091  | 84525387 | A  | ADD  | 6730  | 1.217    | 0.04229  | 1.12   | 1.322  | 4.649    | 3.33E-06  |

| CHR | SNP        | BP       | A1 | TEST | NMISS | OR       | SE       | L95     | U95    | STAT       | P         |
|-----|------------|----------|----|------|-------|----------|----------|---------|--------|------------|-----------|
| 16  | rs2970090  | 84525392 | A  | ADD  | 6716  | 1.168    | 0.03822  | 1.084   | 1.259  | 4.074      | 4.63E-05  |
| 16  | rs56239618 | 84525421 | G  | ADD  | 6704  | 1.119    | 0.04837  | 1.018   | 1.23   | 2.327      | 0.01998   |
| 16  | rs57439018 | 84525761 | C  | ADD  | 7272  | 0.9714   | 0.7936   | 0.205   | 4.602  | -0.03659   | 0.9708    |
| 16  | 84525770   | 84525770 | A  | ADD  | 7287  | 1.20E+09 | 1.41E+04 | 0       | inf    | 0.001486   | 0.9988    |
| 16  | rs2934498  | 84525783 | G  | ADD  | 7281  | 1.183    | 0.03861  | 1.097   | 1.276  | 4.362      | 1.29E-05  |
| 16  | rs447919   | 84526058 | T  | ADD  | 7260  | 0.9887   | 0.03716  | 0.9193  | 1.063  | -0.3046    | 0.7606    |
| 16  | 84526080   | 84526080 | O  | ADD  | 7288  | NA       | NA       | NA      | NA     | NA         | NA        |
| 16  | 84526134   | 84526134 | O  | ADD  | 7282  | NA       | NA       | NA      | NA     | NA         | NA        |
| 16  | rs439885   | 84526175 | A  | ADD  | 7287  | 1.177    | 0.03859  | 1.092   | 1.27   | 4.23       | 2.34E-05  |
| 16  | rs10400953 | 84526344 | T  | ADD  | 7266  | 0.9869   | 0.05261  | 0.8902  | 1.094  | -0.2506    | 0.8021    |
| 16  | 84526382   | 84526382 | T  | ADD  | 7280  | 7.46E-10 | 1.62E+04 | 0       | inf    | -0.001298  | 0.999     |
| 16  | rs450443   | 84526392 | G  | ADD  | 7253  | 1.182    | 0.03866  | 1.096   | 1.275  | 4.331      | 1.48E-05  |
| 16  | rs396987   | 84526435 | G  | ADD  | 7251  | 1.183    | 0.03867  | 1.097   | 1.276  | 4.351      | 1.36E-05  |
| 16  | rs385989   | 84526509 | G  | ADD  | 7198  | 1.137    | 0.03568  | 1.061   | 1.22   | 3.608      | 0.0003088 |
| 16  | 84526528   | 84526528 | A  | ADD  | 7220  | 0.9631   | 0.2825   | 0.5536  | 1.675  | -0.133     | 0.8942    |
| 16  | rs4843865  | 84526806 | T  | ADD  | 7272  | 0.7945   | 0.04842  | 0.7225  | 0.8736 | -4.751     | 2.02E-06  |
| 16  | 84527141   | 84527141 | C  | ADD  | 7276  | 0.7956   | 0.04837  | 0.7237  | 0.8747 | -4.726     | 2.29E-06  |
| 16  | rs8052690  | 84527239 | G  | ADD  | 7287  | 0.7995   | 0.04833  | 0.7272  | 0.8789 | -4.63      | 3.65E-06  |
| 16  | rs7185692  | 84527553 | G  | ADD  | 7257  | 0.9826   | 0.05271  | 0.8861  | 1.089  | -0.3337    | 0.7386    |
| 16  | 84527600   | 84527600 | C  | ADD  | 2997  | 0.9931   | 0.07459  | 0.858   | 1.149  | -0.09274   | 0.9261    |
| 16  | 84527601   | 84527601 | A  | ADD  | 5720  | 0.941    | 0.04145  | 0.8676  | 1.021  | -1.467     | 0.1423    |
| 16  | 84527603   | 84527603 | C  | ADD  | 4131  | 0.9937   | 0.05154  | 0.8983  | 1.099  | -0.1216    | 0.9032    |
| 16  | 84527612   | 84527612 | C  | ADD  | 6974  | 2.348    | 0.3906   | 1.092   | 5.047  | 2.185      | 0.0289    |
| 16  | 84527613   | 84527613 | T  | ADD  | 6647  | 1.678    | 0.3378   | 0.8657  | 3.254  | 1.533      | 0.1253    |
| 16  | 84527727   | 84527727 | O  | ADD  | 7166  | NA       | NA       | NA      | NA     | NA         | NA        |
| 16  | 84527829   | 84527829 | C  | ADD  | 7177  | 1.23     | 0.5215   | 0.4425  | 3.418  | 0.3967     | 0.6916    |
| 16  | rs8059144  | 84527977 | C  | ADD  | 7236  | 0.855    | 0.0388   | 0.7924  | 0.9226 | -4.036     | 5.43E-05  |
| 16  | rs8045825  | 84527979 | G  | ADD  | 7241  | 0.8552   | 0.03878  | 0.7926  | 0.9227 | -4.033     | 5.50E-05  |
| 16  | 84528014   | 84528014 | G  | ADD  | 7285  | 3.93E-10 | 2.44E+04 | 0       | inf    | -0.0008884 | 0.9993    |
| 16  | 84528020   | 84528020 | T  | ADD  | 7249  | 0.3944   | 0.5708   | 0.1289  | 1.207  | -1.63      | 0.1031    |
| 16  | rs4843866  | 84528151 | T  | ADD  | 7244  | 0.855    | 0.03877  | 0.7924  | 0.9225 | -4.042     | 5.30E-05  |
| 16  | rs4843867  | 84528219 | G  | ADD  | 7246  | 0.855    | 0.03877  | 0.7924  | 0.9225 | -4.041     | 5.32E-05  |
| 16  | 84528233   | 84528233 | A  | ADD  | 7286  | 0.1333   | 1.091    | 0.01571 | 1.132  | -1.846     | 0.06485   |
| 16  | rs186249   | 84528397 | C  | ADD  | 7118  | 1.181    | 0.03932  | 1.093   | 1.275  | 4.221      | 2.44E-05  |
| 16  | 84528620   | 84528620 | O  | ADD  | 7293  | NA       | NA       | NA      | NA     | NA         | NA        |
| 16  | 84528669   | 84528669 | O  | ADD  | 7272  | NA       | NA       | NA      | NA     | NA         | NA        |
| 16  | rs12149636 | 84528721 | G  | ADD  | 7267  | 0.8561   | 0.03929  | 0.7927  | 0.9247 | -3.954     | 7.69E-05  |
| 16  | 84528857   | 84528857 | C  | ADD  | 7063  | 0.8532   | 0.04109  | 0.7872  | 0.9247 | -3.864     | 0.0001113 |
| 16  | 84528860   | 84528860 | T  | ADD  | 6258  | 0.7446   | 0.06097  | 0.6607  | 0.8391 | -4.836     | 1.32E-06  |
| 16  | rs12149642 | 84528922 | T  | ADD  | 6982  | 0.8392   | 0.04156  | 0.7735  | 0.9104 | -4.219     | 2.45E-05  |
| 16  | 84529014   | 84529014 | G  | ADD  | 6899  | 0.8294   | 0.1393   | 0.6312  | 1.09   | -1.343     | 0.1793    |
| 16  | 84529016   | 84529016 | C  | ADD  | 3130  | 0.813    | 0.08057  | 0.6943  | 0.9521 | -2.569     | 0.01019   |
| 16  | 84529025   | 84529025 | C  | ADD  | 5374  | 0.908    | 0.07985  | 0.7765  | 1.062  | -1.208     | 0.2269    |
| 16  | 84529026   | 84529026 | C  | ADD  | 5832  | 0.7939   | 0.06047  | 0.7052  | 0.8938 | -3.816     | 0.0001355 |
| 16  | 84529027   | 84529027 | C  | ADD  | 6415  | 0.831    | 0.04619  | 0.759   | 0.9097 | -4.009     | 6.11E-05  |
| 16  | 84529028   | 84529028 | C  | ADD  | 6282  | 0.8552   | 0.0448   | 0.7833  | 0.9337 | -3.49      | 0.0004824 |
| 16  | 84529029   | 84529029 | C  | ADD  | 6579  | 0.8419   | 0.04241  | 0.7748  | 0.9149 | -4.057     | 4.97E-05  |
| 16  | 84529030   | 84529030 | C  | ADD  | 6579  | 0.8419   | 0.04241  | 0.7748  | 0.9149 | -4.057     | 4.97E-05  |
| 16  | 84529031   | 84529031 | C  | ADD  | 6283  | 0.8319   | 0.04277  | 0.765   | 0.9047 | -4.303     | 1.69E-05  |
| 16  | rs12149223 | 84529032 | C  | ADD  | 5696  | 0.8714   | 0.1225   | 0.6855  | 1.108  | -1.124     | 0.261     |
| 16  | 84529037   | 84529037 | C  | ADD  | 6871  | 0.8912   | 0.2261   | 0.5721  | 1.388  | -0.5097    | 0.6103    |
| 16  | 84529038   | 84529038 | C  | ADD  | 6932  | 1.189    | 0.3545   | 0.5934  | 2.382  | 0.4879     | 0.6256    |
| 16  | 84529220   | 84529220 | T  | ADD  | 6981  | 0.9867   | 0.1462   | 0.7409  | 1.314  | -0.09145   | 0.9271    |

| CHR | SNP        | BP       | A1 | TEST | NMISS | OR       | SE       | L95     | U95    | STAT      | P         |
|-----|------------|----------|----|------|-------|----------|----------|---------|--------|-----------|-----------|
| 16  | 84529277   | 84529277 | 0  | ADD  | 7293  | NA       | NA       | NA      | NA     | NA        | NA        |
| 16  | rs305067   | 84529341 | C  | ADD  | 6672  | 0.9858   | 0.03967  | 0.912   | 1.065  | -0.3616   | 0.7177    |
| 16  | rs11117419 | 84529383 | G  | ADD  | 7258  | 0.8473   | 0.04083  | 0.7822  | 0.9179 | -4.057    | 4.97E-05  |
| 16  | rs11117420 | 84529423 | C  | ADD  | 7045  | 0.814    | 0.05229  | 0.7347  | 0.9019 | -3.935    | 8.32E-05  |
| 16  | rs11117421 | 84529461 | A  | ADD  | 7257  | 0.8475   | 0.04083  | 0.7823  | 0.9181 | -4.053    | 5.06E-05  |
| 16  | rs11117422 | 84529514 | C  | ADD  | 7195  | 0.7825   | 0.05014  | 0.7093  | 0.8633 | -4.891    | 1.01E-06  |
| 16  | 84529575   | 84529575 | 0  | ADD  | 7220  | NA       | NA       | NA      | NA     | NA        | NA        |
| 16  | rs11117423 | 84529682 | C  | ADD  | 7222  | 0.8463   | 0.04097  | 0.781   | 0.9171 | -4.073    | 4.64E-05  |
| 16  | rs11117424 | 84529738 | G  | ADD  | 7277  | 0.8488   | 0.04076  | 0.7836  | 0.9194 | -4.023    | 5.75E-05  |
| 16  | rs11117425 | 84529772 | T  | ADD  | 7280  | 0.8488   | 0.04085  | 0.7835  | 0.9196 | -4.012    | 6.03E-05  |
| 16  | rs11648012 | 84529908 | T  | ADD  | 7273  | 0.8493   | 0.04075  | 0.7841  | 0.9199 | -4.008    | 6.14E-05  |
| 16  | 84530040   | 84530040 | T  | ADD  | 7278  | 0.7145   | 1.419    | 0.04424 | 11.54  | -0.2369   | 0.8128    |
| 16  | rs11643999 | 84530070 | A  | ADD  | 7281  | 0.8476   | 0.04077  | 0.7825  | 0.9182 | -4.054    | 5.03E-05  |
| 16  | rs11648084 | 84530099 | T  | ADD  | 7289  | 0.8494   | 0.04079  | 0.7841  | 0.9201 | -4.001    | 6.30E-05  |
| 16  | rs11644034 | 84530113 | A  | ADD  | 7245  | 0.7908   | 0.04996  | 0.717   | 0.8722 | -4.698    | 2.63E-06  |
| 16  | rs16940083 | 84530130 | T  | ADD  | 7284  | 0.7603   | 0.7658   | 0.1695  | 3.411  | -0.3579   | 0.7204    |
| 16  | 84530187   | 84530187 | 0  | ADD  | 7136  | NA       | NA       | NA      | NA     | NA        | NA        |
| 16  | rs305066   | 84530277 | T  | ADD  | 7202  | 1.177    | 0.03804  | 1.092   | 1.268  | 4.276     | 1.91E-05  |
| 16  | rs12600127 | 84530280 | G  | ADD  | 7238  | 0.8471   | 0.04089  | 0.7819  | 0.9178 | -4.058    | 4.95E-05  |
| 16  | rs13335265 | 84530311 | C  | ADD  | 6901  | 0.7697   | 0.05105  | 0.6964  | 0.8507 | -5.128    | 2.93E-07  |
| 16  | 84530325   | 84530325 | 0  | ADD  | 7235  | NA       | NA       | NA      | NA     | NA        | NA        |
| 16  | 84530431   | 84530431 | G  | ADD  | 7282  | 7.47E-10 | 1.62E+04 | 0       | inf    | -0.001298 | 0.999     |
| 16  | rs62051023 | 84530439 | T  | ADD  | 7252  | 1.27     | 0.1684   | 0.9128  | 1.766  | 1.418     | 0.1562    |
| 16  | 84530468   | 84530468 | T  | ADD  | 7255  | 0.603    | 1.309    | 0.04634 | 7.846  | -0.3864   | 0.6992    |
| 16  | rs8062669  | 84530493 | T  | ADD  | 7278  | 1.031    | 0.08859  | 0.8666  | 1.226  | 0.344     | 0.7308    |
| 16  | rs12711490 | 84530529 | C  | ADD  | 7283  | 0.7878   | 0.04981  | 0.7146  | 0.8686 | -4.788    | 1.69E-06  |
| 16  | 84530554   | 84530554 | C  | ADD  | 7285  | 1.59     | 0.7357   | 0.3759  | 6.722  | 0.6301    | 0.5286    |
| 16  | rs12598434 | 84530560 | T  | ADD  | 7240  | 0.85     | 0.04084  | 0.7847  | 0.9209 | -3.978    | 6.94E-05  |
| 16  | rs11641153 | 84530641 | G  | ADD  | 7246  | 0.7766   | 0.05019  | 0.7038  | 0.8569 | -5.038    | 4.71E-07  |
| 16  | rs11641155 | 84530653 | G  | ADD  | 7245  | 0.776    | 0.0502   | 0.7033  | 0.8562 | -5.052    | 4.38E-07  |
| 16  | rs7205434  | 84530696 | G  | ADD  | 7245  | 0.776    | 0.0502   | 0.7033  | 0.8562 | -5.052    | 4.38E-07  |
| 16  | rs8050476  | 84530705 | G  | ADD  | 7291  | 0.999    | 0.08662  | 0.843   | 1.184  | -0.01133  | 0.991     |
| 16  | rs4843868  | 84530902 | T  | ADD  | 7233  | 0.774    | 0.05026  | 0.7014  | 0.8541 | -5.098    | 3.44E-07  |
| 16  | 84530967   | 84530967 | T  | ADD  | 7268  | 0.9674   | 0.1079   | 0.783   | 1.195  | -0.3068   | 0.759     |
| 16  | rs1879213  | 84530977 | T  | ADD  | 7253  | 0.9787   | 0.05861  | 0.8725  | 1.098  | -0.3669   | 0.7137    |
| 16  | rs56250418 | 84530999 | T  | ADD  | 7015  | 1.122    | 0.04498  | 1.028   | 1.226  | 2.567     | 0.01025   |
| 16  | rs305065   | 84531367 | G  | ADD  | 7230  | 0.9797   | 0.03744  | 0.9104  | 1.054  | -0.5485   | 0.5834    |
| 16  | 84531390   | 84531390 | C  | ADD  | 7196  | 1        | 0.273    | 0.5857  | 1.708  | 0.0003247 | 0.9997    |
| 16  | rs305064   | 84531643 | T  | ADD  | 7228  | 0.9843   | 0.03758  | 0.9144  | 1.06   | -0.4201   | 0.6744    |
| 16  | rs9927123  | 84531682 | G  | ADD  | 7253  | 0.8624   | 0.03898  | 0.7989  | 0.9308 | -3.799    | 0.0001456 |
| 16  | rs16940087 | 84531752 | T  | ADD  | 7284  | 0.7603   | 0.7658   | 0.1695  | 3.411  | -0.3579   | 0.7204    |
| 16  | rs16940088 | 84531870 | T  | ADD  | 7244  | 0.9814   | 0.05871  | 0.8747  | 1.101  | -0.3198   | 0.7492    |
| 16  | rs13330932 | 84532008 | T  | ADD  | 7209  | 0.8234   | 0.04171  | 0.7587  | 0.8935 | -4.659    | 3.18E-06  |
| 16  | 84532040   | 84532040 | T  | ADD  | 7256  | 0.603    | 1.309    | 0.04634 | 7.846  | -0.3864   | 0.6992    |
| 16  | rs305063   | 84532158 | T  | ADD  | 6982  | 1.16     | 0.03856  | 1.076   | 1.251  | 3.857     | 0.0001149 |
| 16  | 84532198   | 84532198 | 0  | ADD  | 7277  | NA       | NA       | NA      | NA     | NA        | NA        |
| 16  | rs56834409 | 84532277 | G  | ADD  | 7245  | 0.9821   | 0.05872  | 0.8754  | 1.102  | -0.3072   | 0.7587    |
| 16  | 84532342   | 84532342 | C  | ADD  | 4909  | 0.9526   | 0.08402  | 0.808   | 1.123  | -0.5777   | 0.5635    |
| 16  | rs4843322  | 84532386 | G  | ADD  | 7249  | 0.8421   | 0.04082  | 0.7773  | 0.9122 | -4.21     | 2.55E-05  |
| 16  | rs4843323  | 84532462 | T  | ADD  | 7224  | 0.7756   | 0.05043  | 0.7026  | 0.8562 | -5.038    | 4.70E-07  |
| 16  | rs12596291 | 84532538 | C  | ADD  | 7242  | 0.98     | 0.05876  | 0.8734  | 1.1    | -0.3438   | 0.731     |
| 16  | rs12596295 | 84532576 | A  | ADD  | 7241  | 0.9274   | 0.06329  | 0.8192  | 1.05   | -1.191    | 0.2337    |
| 16  | rs4843869  | 84532642 | A  | ADD  | 7235  | 0.7753   | 0.0504   | 0.7024  | 0.8558 | -5.051    | 4.40E-07  |



| CHR | SNP        | BP       | A1 | TEST | NMISS | OR       | SE       | L95     | U95    | STAT       | P         |
|-----|------------|----------|----|------|-------|----------|----------|---------|--------|------------|-----------|
| 16  | 84532733   | 84532733 | 0  | ADD  | 7136  | NA       | NA       | NA      | NA     | NA         | NA        |
| 16  | 84532800   | 84532800 | G  | ADD  | 7013  | 1.312    | 0.4483   | 0.5449  | 3.158  | 0.6054     | 0.5449    |
| 16  | 84532862   | 84532862 | 0  | ADD  | 7001  | NA       | NA       | NA      | NA     | NA         | NA        |
| 16  | rs305062   | 84533003 | G  | ADD  | 7288  | 1.271    | 0.1789   | 0.8952  | 1.805  | 1.341      | 0.1798    |
| 16  | rs305061   | 84533160 | C  | ADD  | 7270  | 0.9815   | 0.03775  | 0.9115  | 1.057  | -0.4957    | 0.6201    |
| 16  | 84533416   | 84533416 | C  | ADD  | 4231  | 1.222    | 0.07076  | 1.064   | 1.404  | 2.838      | 0.004536  |
| 16  | rs305060   | 84533417 | C  | ADD  | 7247  | 1.149    | 0.03517  | 1.072   | 1.231  | 3.945      | 7.98E-05  |
| 16  | rs16940099 | 84533441 | C  | ADD  | 7259  | 1.009    | 0.08982  | 0.8458  | 1.203  | 0.09562    | 0.9238    |
| 16  | rs16940100 | 84533460 | T  | ADD  | 7273  | 1.015    | 0.08873  | 0.8526  | 1.207  | 0.1633     | 0.8703    |
| 16  | 84533481   | 84533481 | 0  | ADD  | 7291  | NA       | NA       | NA      | NA     | NA         | NA        |
| 16  | rs305059   | 84533519 | A  | ADD  | 7074  | 1.144    | 0.03556  | 1.067   | 1.226  | 3.772      | 0.0001622 |
| 16  | 84533526   | 84533526 | 0  | ADD  | 7287  | NA       | NA       | NA      | NA     | NA         | NA        |
| 16  | 84533672   | 84533672 | T  | ADD  | 7273  | 1.015    | 0.08873  | 0.8526  | 1.207  | 0.1633     | 0.8703    |
| 16  | 84533804   | 84533804 | C  | ADD  | 7272  | 1.014    | 0.08872  | 0.8525  | 1.207  | 0.1613     | 0.8718    |
| 16  | 84533839   | 84533839 | 0  | ADD  | 7148  | NA       | NA       | NA      | NA     | NA         | NA        |
| 16  | 84533939   | 84533939 | C  | ADD  | 7125  | 1.013    | 0.089    | 0.8512  | 1.207  | 0.1505     | 0.8804    |
| 16  | 84534522   | 84534522 | G  | ADD  | 7210  | 1.135    | 0.2253   | 0.7298  | 1.765  | 0.5621     | 0.574     |
| 16  | 84534632   | 84534632 | C  | ADD  | 7288  | 1.217    | 0.7876   | 0.2599  | 5.698  | 0.2493     | 0.8031    |
| 16  | 84534741   | 84534741 | T  | ADD  | 7163  | 1.229    | 0.5214   | 0.4423  | 3.415  | 0.3954     | 0.6926    |
| 16  | rs7202472  | 84535003 | T  | ADD  | 7251  | 0.7751   | 0.05144  | 0.7007  | 0.8573 | -4.954     | 7.28E-07  |
| 16  | 84535111   | 84535111 | T  | ADD  | 7154  | 0.9189   | 0.204    | 0.6161  | 1.371  | -0.4144    | 0.6786    |
| 16  | 84535271   | 84535271 | A  | ADD  | 7259  | 0.2885   | 0.8388   | 0.05574 | 1.493  | -1.482     | 0.1383    |
| 16  | 84535272   | 84535272 | A  | ADD  | 7276  | 0.1813   | 1.122    | 0.02011 | 1.634  | -1.522     | 0.1279    |
| 16  | rs305097   | 84535412 | A  | ADD  | 7196  | 1.184    | 0.03857  | 1.098   | 1.277  | 4.381      | 1.18E-05  |
| 16  | rs62051024 | 84535456 | C  | ADD  | 7000  | 1.124    | 0.04496  | 1.029   | 1.228  | 2.605      | 0.009189  |
| 16  | rs305095   | 84535500 | T  | ADD  | 7262  | 1.185    | 0.03846  | 1.099   | 1.278  | 4.411      | 1.03E-05  |
| 16  | rs305094   | 84535606 | C  | ADD  | 7236  | 0.9822   | 0.03793  | 0.9119  | 1.058  | -0.4724    | 0.6367    |
| 16  | rs72807020 | 84535618 | G  | ADD  | 7229  | 0.9322   | 0.05694  | 0.8337  | 1.042  | -1.234     | 0.2173    |
| 16  | rs16940101 | 84535626 | G  | ADD  | 7290  | 1.005    | 0.08715  | 0.8469  | 1.192  | 0.0536     | 0.9573    |
| 16  | rs16940103 | 84535710 | T  | ADD  | 7228  | 0.924    | 0.057    | 0.8263  | 1.033  | -1.387     | 0.1654    |
| 16  | rs16940104 | 84535711 | T  | ADD  | 7272  | 0.996    | 0.08866  | 0.8371  | 1.185  | -0.04558   | 0.9636    |
| 16  | rs7186094  | 84535988 | T  | ADD  | 7281  | 0.9871   | 0.05249  | 0.8906  | 1.094  | -0.2478    | 0.8043    |
| 16  | rs7190319  | 84536046 | G  | ADD  | 7289  | 0.9922   | 0.0525   | 0.8952  | 1.1    | -0.1484    | 0.882     |
| 16  | rs305093   | 84536086 | T  | ADD  | 7256  | 0.9805   | 0.03791  | 0.9103  | 1.056  | -0.5197    | 0.6033    |
| 16  | 84536244   | 84536244 | 0  | ADD  | 7283  | NA       | NA       | NA      | NA     | NA         | NA        |
| 16  | rs11639990 | 84536305 | G  | ADD  | 7289  | 0.9919   | 0.05245  | 0.895   | 1.099  | -0.1547    | 0.877     |
| 16  | 84536585   | 84536585 | 0  | ADD  | 7200  | NA       | NA       | NA      | NA     | NA         | NA        |
| 16  | 84536608   | 84536608 | C  | ADD  | 7258  | 3.052    | 0.5031   | 1.139   | 8.182  | 2.218      | 0.02656   |
| 16  | rs305092   | 84536618 | A  | ADD  | 7234  | 0.9856   | 0.03754  | 0.9157  | 1.061  | -0.3854    | 0.7       |
| 16  | rs305091   | 84536744 | A  | ADD  | 7249  | 0.9785   | 0.03733  | 0.9094  | 1.053  | -0.5834    | 0.5597    |
| 16  | 84536846   | 84536846 | C  | ADD  | 3116  | 0.9376   | 0.07184  | 0.8144  | 1.079  | -0.8973    | 0.3695    |
| 16  | rs305090   | 84536847 | T  | ADD  | 7243  | 0.9867   | 0.0374   | 0.9169  | 1.062  | -0.3583    | 0.7201    |
| 16  | 84536862   | 84536862 | A  | ADD  | 7287  | 2.448    | 0.5619   | 0.8137  | 7.364  | 1.593      | 0.1111    |
| 16  | 84537033   | 84537033 | T  | ADD  | 7230  | 4.28E-10 | 2.44E+04 | 0       | inf    | -0.0008849 | 0.9993    |
| 16  | 84537070   | 84537070 | T  | ADD  | 7261  | 0.3283   | 0.8499   | 0.06208 | 1.737  | -1.31      | 0.19      |
| 16  | 84537135   | 84537135 | 0  | ADD  | 7248  | NA       | NA       | NA      | NA     | NA         | NA        |
| 16  | 84537212   | 84537212 | A  | ADD  | 7278  | 7.47E-10 | 1.62E+04 | 0       | inf    | -0.001298  | 0.999     |
| 16  | 84537309   | 84537309 | 0  | ADD  | 7282  | NA       | NA       | NA      | NA     | NA         | NA        |
| 16  | rs11641591 | 84537652 | T  | ADD  | 7237  | 1.205    | 0.1799   | 0.8469  | 1.714  | 1.036      | 0.3001    |
| 16  | rs62051025 | 84537707 | T  | ADD  | 6860  | 1.13     | 0.04356  | 1.038   | 1.231  | 2.813      | 0.004903  |
| 16  | rs965773   | 84537847 | A  | ADD  | 7237  | 1.028    | 0.037    | 0.9563  | 1.106  | 0.7521     | 0.452     |
| 16  | rs16940113 | 84537948 | T  | ADD  | 7285  | 1.169    | 0.8677   | 0.2134  | 6.402  | 0.1798     | 0.8573    |
| 16  | 84538025   | 84538025 | G  | ADD  | 7251  | 1.048    | 0.09477  | 0.8705  | 1.262  | 0.4962     | 0.6197    |

| CHR | SNP        | BP       | A1 | TEST | NMISS | OR       | SE       | L95     | U95    | STAT       | P        |
|-----|------------|----------|----|------|-------|----------|----------|---------|--------|------------|----------|
| 16  | rs731708   | 84538035 | A  | ADD  | 7198  | 0.7777   | 0.05152  | 0.703   | 0.8603 | -4.88      | 1.06E-06 |
| 16  | 84538040   | 84538040 | T  | ADD  | 6992  | 0.6598   | 0.2575   | 0.3983  | 1.093  | -1.615     | 0.1063   |
| 16  | rs731709   | 84538088 | C  | ADD  | 7258  | 1.169    | 0.03835  | 1.085   | 1.261  | 4.081      | 4.48E-05 |
| 16  | 84538106   | 84538106 | T  | ADD  | 6979  | 1.115    | 0.2491   | 0.6845  | 1.817  | 0.4382     | 0.6613   |
| 16  | 84538380   | 84538380 | O  | ADD  | 7267  | NA       | NA       | NA      | NA     | NA         | NA       |
| 16  | rs731707   | 84538469 | C  | ADD  | 7239  | 1.031    | 0.03699  | 0.9593  | 1.109  | 0.8355     | 0.4034   |
| 16  | 84538530   | 84538530 | A  | ADD  | 7261  | 0.8924   | 1.062    | 0.1113  | 7.157  | -0.1072    | 0.9146   |
| 16  | rs305089   | 84538531 | T  | ADD  | 7266  | 0.9765   | 0.038    | 0.9064  | 1.052  | -0.6253    | 0.5318   |
| 16  | 84538676   | 84538676 | O  | ADD  | 7262  | NA       | NA       | NA      | NA     | NA         | NA       |
| 16  | 84538740   | 84538740 | T  | ADD  | 7181  | 0.2578   | 1.241    | 0.02262 | 2.938  | -1.092     | 0.2749   |
| 16  | 84538942   | 84538942 | G  | ADD  | 6983  | 0.8549   | 0.1982   | 0.5798  | 1.261  | -0.791     | 0.429    |
| 16  | 84538944   | 84538944 | T  | ADD  | 7272  | 4.17E-10 | 1.72E+04 | 0       | inf    | -0.001253  | 0.999    |
| 16  | rs11643168 | 84538983 | T  | ADD  | 7239  | 1.041    | 0.06945  | 0.9086  | 1.193  | 0.5797     | 0.5621   |
| 16  | rs305088   | 84539102 | T  | ADD  | 7220  | 0.992    | 0.03823  | 0.9204  | 1.069  | -0.2095    | 0.834    |
| 16  | 84539195   | 84539195 | C  | ADD  | 7291  | 1.26E+09 | 2.44E+04 | 0       | inf    | 0.0008596  | 0.9993   |
| 16  | 84539211   | 84539211 | C  | ADD  | 7276  | 1.356    | 1.225    | 0.1228  | 14.98  | 0.2487     | 0.8036   |
| 16  | 84539306   | 84539306 | A  | ADD  | 6280  | 1.108    | 0.0888   | 0.9311  | 1.319  | 1.156      | 0.2477   |
| 16  | rs305087   | 84539747 | C  | ADD  | 6889  | 0.9115   | 0.05553  | 0.8175  | 1.016  | -1.669     | 0.09504  |
| 16  | rs7198504  | 84539802 | C  | ADD  | 6767  | 0.931    | 0.04204  | 0.8574  | 1.011  | -1.7       | 0.0891   |
| 16  | rs9935237  | 84540017 | G  | ADD  | 6156  | 0.7231   | 0.3439   | 0.3685  | 1.419  | -0.9426    | 0.3459   |
| 16  | rs305086   | 84540022 | A  | ADD  | 7287  | 1.046    | 0.04855  | 0.9508  | 1.15   | 0.92       | 0.3576   |
| 16  | rs8053060  | 84540490 | A  | ADD  | 4999  | 1.043    | 0.05221  | 0.9416  | 1.155  | 0.8064     | 0.42     |
| 16  | 84540536   | 84540536 | O  | ADD  | 7293  | NA       | NA       | NA      | NA     | NA         | NA       |
| 16  | 84540547   | 84540547 | O  | ADD  | 7293  | NA       | NA       | NA      | NA     | NA         | NA       |
| 16  | rs6540234  | 84540557 | T  | ADD  | 7242  | 0.9568   | 0.03964  | 0.8853  | 1.034  | -1.114     | 0.2652   |
| 16  | rs8049187  | 84540779 | T  | ADD  | 5014  | 1.057    | 0.04539  | 0.967   | 1.155  | 1.221      | 0.222    |
| 16  | rs8062690  | 84540827 | G  | ADD  | 4944  | 0.9683   | 0.1002   | 0.7956  | 1.179  | -0.3209    | 0.7483   |
| 16  | rs8053604  | 84540842 | T  | ADD  | 4244  | 1.046    | 0.0495   | 0.9495  | 1.153  | 0.9133     | 0.3611   |
| 16  | 84541049   | 84541049 | G  | ADD  | 7280  | 3.92E-10 | 2.44E+04 | 0       | inf    | -0.0008885 | 0.9993   |
| 16  | 84541077   | 84541077 | O  | ADD  | 6972  | NA       | NA       | NA      | NA     | NA         | NA       |
| 16  | 84541142   | 84541142 | G  | ADD  | 7290  | 3.93E-10 | 2.44E+04 | 0       | inf    | -0.0008884 | 0.9993   |
| 16  | 84541177   | 84541177 | C  | ADD  | 4133  | 0.9647   | 0.05482  | 0.8664  | 1.074  | -0.6552    | 0.5124   |
| 16  | 84541179   | 84541179 | T  | ADD  | 4132  | 0.9658   | 0.05483  | 0.8674  | 1.075  | -0.6342    | 0.526    |
| 16  | 84541180   | 84541180 | C  | ADD  | 4132  | 0.9658   | 0.05483  | 0.8674  | 1.075  | -0.6342    | 0.526    |
| 16  | rs2361768  | 84541181 | G  | ADD  | 4132  | 0.9658   | 0.05483  | 0.8674  | 1.075  | -0.6342    | 0.526    |
| 16  | 84541385   | 84541385 | A  | ADD  | 7281  | 3.92E-10 | 2.44E+04 | 0       | inf    | -0.0008885 | 0.9993   |
| 16  | 84541450   | 84541450 | G  | ADD  | 7242  | 0.697    | 1.416    | 0.04342 | 11.19  | -0.2549    | 0.7988   |
| 16  | rs55739703 | 84541492 | G  | ADD  | 7230  | 0.8925   | 0.1161   | 0.7109  | 1.12   | -0.9799    | 0.3271   |
| 16  | rs870614   | 84541516 | A  | ADD  | 5777  | 0.9084   | 0.05646  | 0.8133  | 1.015  | -1.701     | 0.08889  |
| 16  | rs8047292  | 84541556 | T  | ADD  | 7289  | 0.5931   | 0.4912   | 0.2265  | 1.553  | -1.063     | 0.2876   |
| 16  | rs908988   | 84542101 | G  | ADD  | 7266  | 0.9544   | 0.03962  | 0.8831  | 1.031  | -1.177     | 0.239    |
| 16  | rs8060078  | 84542153 | T  | ADD  | 7273  | 2.024    | 0.5881   | 0.6392  | 6.409  | 1.199      | 0.2306   |
| 16  | rs908987   | 84542390 | T  | ADD  | 6882  | 0.9594   | 0.04046  | 0.8862  | 1.039  | -1.025     | 0.3052   |
| 16  | rs908986   | 84542429 | G  | ADD  | 7265  | 0.9719   | 0.03996  | 0.8987  | 1.051  | -0.7144    | 0.475    |
| 16  | rs908985   | 84542503 | T  | ADD  | 7267  | 0.9687   | 0.03995  | 0.8958  | 1.048  | -0.7953    | 0.4264   |
| 16  | 84542511   | 84542511 | A  | ADD  | 7267  | 0.638    | 0.6194   | 0.1895  | 2.148  | -0.7257    | 0.468    |
| 16  | rs908984   | 84542530 | T  | ADD  | 7287  | 0.9721   | 0.03993  | 0.8989  | 1.051  | -0.7083    | 0.4787   |
| 16  | rs57670691 | 84542583 | A  | ADD  | 7243  | 0.8655   | 0.1113   | 0.6959  | 1.076  | -1.298     | 0.1943   |
| 16  | rs57396687 | 84542701 | A  | ADD  | 7249  | 0.8881   | 0.1124   | 0.7125  | 1.107  | -1.056     | 0.2911   |
| 16  | rs1915034  | 84542858 | A  | ADD  | 7277  | 0.9826   | 0.04071  | 0.9072  | 1.064  | -0.4315    | 0.6661   |
| 16  | rs4240807  | 84542862 | A  | ADD  | 7265  | 0.9854   | 0.04075  | 0.9098  | 1.067  | -0.3607    | 0.7183   |
| 16  | rs1915033  | 84542932 | A  | ADD  | 7254  | 0.9725   | 0.03995  | 0.8992  | 1.052  | -0.6989    | 0.4846   |
| 16  | 84542936   | 84542936 | T  | ADD  | 7289  | 3.93E-10 | 2.44E+04 | 0       | inf    | -0.0008884 | 0.9993   |

| CHR | SNP        | BP       | A1 | TEST | NMISS | OR       | SE       | L95     | U95   | STAT       | P      |
|-----|------------|----------|----|------|-------|----------|----------|---------|-------|------------|--------|
| 16  | 84542966   | 84542966 | C  | ADD  | 7289  | 3.93E-10 | 2.44E+04 | 0       | inf   | -0.0008884 | 0.9993 |
| 16  | rs4843871  | 84543036 | G  | ADD  | 7240  | 0.964    | 0.03971  | 0.8918  | 1.042 | -0.9244    | 0.3553 |
| 16  | rs4843872  | 84543172 | A  | ADD  | 7272  | 0.9687   | 0.0399   | 0.8958  | 1.048 | -0.7967    | 0.4256 |
| 16  | 84543226   | 84543226 | A  | ADD  | 7292  | 6.78E+08 | 2.44E+04 | 0       | inf   | 0.0008341  | 0.9993 |
| 16  | rs10863201 | 84543272 | C  | ADD  | 7025  | 0.9652   | 0.04022  | 0.892   | 1.044 | -0.8815    | 0.378  |
| 16  | rs58073431 | 84543416 | C  | ADD  | 7248  | 0.8752   | 0.1126   | 0.7018  | 1.091 | -1.184     | 0.2365 |
| 16  | rs59821663 | 84543420 | A  | ADD  | 7248  | 0.8752   | 0.1126   | 0.7018  | 1.091 | -1.184     | 0.2365 |
| 16  | 84543445   | 84543445 | O  | ADD  | 7289  | NA       | NA       | NA      | NA    | NA         | NA     |
| 16  | 84543446   | 84543446 | O  | ADD  | 7289  | NA       | NA       | NA      | NA    | NA         | NA     |
| 16  | rs59403904 | 84543458 | T  | ADD  | 7163  | 0.9665   | 0.1339   | 0.7434  | 1.257 | -0.2541    | 0.7994 |
| 16  | 84543506   | 84543506 | O  | ADD  | 7293  | NA       | NA       | NA      | NA    | NA         | NA     |
| 16  | 84543518   | 84543518 | O  | ADD  | 7293  | NA       | NA       | NA      | NA    | NA         | NA     |
| 16  | rs58189590 | 84543560 | A  | ADD  | 7241  | 0.869    | 0.1125   | 0.6971  | 1.083 | -1.248     | 0.2119 |
| 16  | rs57426547 | 84543596 | T  | ADD  | 7241  | 0.869    | 0.1125   | 0.6971  | 1.083 | -1.248     | 0.2119 |
| 16  | 84543660   | 84543660 | O  | ADD  | 7293  | NA       | NA       | NA      | NA    | NA         | NA     |
| 16  | rs73268906 | 84544188 | G  | ADD  | 7243  | 0.8754   | 0.1126   | 0.702   | 1.092 | -1.181     | 0.2375 |
| 16  | rs73268908 | 84544290 | A  | ADD  | 7252  | 0.8812   | 0.1128   | 0.7064  | 1.099 | -1.121     | 0.2623 |
| 16  | rs73268912 | 84544401 | A  | ADD  | 7248  | 0.8897   | 0.1125   | 0.7136  | 1.109 | -1.039     | 0.299  |
| 16  | 84544635   | 84544635 | T  | ADD  | 7249  | 0.5774   | 0.6658   | 0.1566  | 2.129 | -0.8249    | 0.4094 |
| 16  | 84544641   | 84544641 | O  | ADD  | 7291  | NA       | NA       | NA      | NA    | NA         | NA     |
| 16  | 84544743   | 84544743 | G  | ADD  | 7289  | 3.93E-10 | 2.44E+04 | 0       | inf   | -0.0008884 | 0.9993 |
| 16  | rs59120392 | 84544797 | T  | ADD  | 7255  | 0.8856   | 0.1127   | 0.7101  | 1.104 | -1.079     | 0.2807 |
| 16  | rs57278440 | 84544999 | C  | ADD  | 7256  | 0.8854   | 0.1127   | 0.71    | 1.104 | -1.08      | 0.2802 |
| 16  | rs10863202 | 84545499 | A  | ADD  | 7163  | 0.9696   | 0.03988  | 0.8967  | 1.048 | -0.7748    | 0.4384 |
| 16  | rs8060960  | 84545861 | T  | ADD  | 7244  | 0.9564   | 0.04008  | 0.8842  | 1.035 | -1.112     | 0.2662 |
| 16  | rs8048151  | 84546099 | C  | ADD  | 7225  | 0.9746   | 0.04056  | 0.9001  | 1.055 | -0.6336    | 0.5264 |
| 16  | 84546166   | 84546166 | A  | ADD  | 7251  | 0.5454   | 0.8929   | 0.09477 | 3.139 | -0.6789    | 0.4972 |
| 16  | 84546175   | 84546175 | A  | ADD  | 7289  | 3.93E-10 | 2.44E+04 | 0       | inf   | -0.0008884 | 0.9993 |
| 16  | rs73268923 | 84546268 | T  | ADD  | 7255  | 0.8946   | 0.1129   | 0.7169  | 1.116 | -0.9862    | 0.324  |
| 16  | 84546359   | 84546359 | A  | ADD  | 7249  | 0.8828   | 0.1126   | 0.708   | 1.101 | -1.108     | 0.268  |
| 16  | rs6540235  | 84546396 | T  | ADD  | 7248  | 0.9714   | 0.03968  | 0.8987  | 1.05  | -0.7326    | 0.4638 |
| 16  | 84546553   | 84546553 | O  | ADD  | 7267  | NA       | NA       | NA      | NA    | NA         | NA     |
| 16  | rs7186247  | 84546570 | T  | ADD  | 7233  | 0.9655   | 0.03976  | 0.8931  | 1.044 | -0.8822    | 0.3777 |
| 16  | 84546654   | 84546654 | G  | ADD  | 7198  | 0.8206   | 0.4597   | 0.3333  | 2.02  | -0.4302    | 0.6671 |
| 16  | rs7199472  | 84546685 | G  | ADD  | 7283  | 0.9595   | 0.03972  | 0.8876  | 1.037 | -1.042     | 0.2974 |
| 16  | rs11640143 | 84546965 | C  | ADD  | 7265  | 1.07     | 0.08714  | 0.9019  | 1.269 | 0.7746     | 0.4386 |
| 16  | 84547130   | 84547130 | T  | ADD  | 7225  | 1.244    | 1.494    | 0.06662 | 23.25 | 0.1464     | 0.8836 |
| 16  | 84547216   | 84547216 | T  | ADD  | 7293  | 1.767    | 1.157    | 0.1831  | 17.05 | 0.4921     | 0.6227 |
| 16  | rs4843873  | 84547276 | A  | ADD  | 7263  | 0.985    | 0.04029  | 0.9102  | 1.066 | -0.3759    | 0.707  |
| 16  | 84547352   | 84547352 | A  | ADD  | 7201  | 1.56     | 0.3843   | 0.7343  | 3.313 | 1.156      | 0.2475 |
| 16  | rs4843874  | 84547399 | C  | ADD  | 7271  | 0.9744   | 0.04023  | 0.9005  | 1.054 | -0.6455    | 0.5186 |
| 16  | rs4843875  | 84547443 | T  | ADD  | 5707  | 1.025    | 0.05651  | 0.9179  | 1.146 | 0.4445     | 0.6567 |
| 16  | 84547570   | 84547570 | O  | ADD  | 7293  | NA       | NA       | NA      | NA    | NA         | NA     |
| 16  | 84547601   | 84547601 | C  | ADD  | 7252  | 0.5457   | 0.893    | 0.09481 | 3.141 | -0.6782    | 0.4976 |
| 16  | rs73268928 | 84547653 | G  | ADD  | 7236  | 0.9005   | 0.1148   | 0.7191  | 1.128 | -0.9129    | 0.3613 |
| 16  | 84547657   | 84547657 | O  | ADD  | 7263  | NA       | NA       | NA      | NA    | NA         | NA     |
| 16  | rs11117426 | 84547768 | C  | ADD  | 7205  | NA       | NA       | NA      | NA    | NA         | NA     |
| 16  | 84547926   | 84547926 | C  | ADD  | 7291  | 3.93E-10 | 2.44E+04 | 0       | inf   | -0.0008884 | 0.9993 |
| 16  | rs11117427 | 84548058 | A  | ADD  | 7293  | NA       | NA       | NA      | NA    | NA         | NA     |
| 16  | rs925992   | 84548081 | T  | ADD  | 7076  | 0.9785   | 0.04093  | 0.903   | 1.06  | -0.5319    | 0.5948 |
| 16  | 84548374   | 84548374 | T  | ADD  | 7292  | 3.93E-10 | 2.44E+04 | 0       | inf   | -0.0008884 | 0.9993 |
| 16  | 84548382   | 84548382 | C  | ADD  | 7217  | 0.3473   | 0.7196   | 0.08477 | 1.423 | -1.47      | 0.1416 |
| 16  | rs8057009  | 84548424 | G  | ADD  | 7280  | 0.9854   | 0.04153  | 0.9084  | 1.069 | -0.3533    | 0.7238 |

| CHR | SNP        | BP       | A1 | TEST | NMISS | OR       | SE       | L95     | U95    | STAT       | P       |
|-----|------------|----------|----|------|-------|----------|----------|---------|--------|------------|---------|
| 16  | rs6540236  | 84548591 | A  | ADD  | 7188  | 0.9849   | 0.04061  | 0.9096  | 1.067  | -0.3736    | 0.7087  |
| 16  | rs12445476 | 84548770 | G  | ADD  | 7290  | 0.7274   | 0.2435   | 0.4513  | 1.172  | -1.307     | 0.1912  |
| 16  | 84548866   | 84548866 | G  | ADD  | 7285  | 10.11    | 1.089    | 1.197   | 85.4   | 2.125      | 0.03358 |
| 16  | 84548901   | 84548901 | T  | ADD  | 5746  | 0.911    | 0.1094   | 0.7352  | 1.129  | -0.8523    | 0.394   |
| 16  | rs7185590  | 84549154 | A  | ADD  | 7247  | 1.84     | 0.3857   | 0.8642  | 3.92   | 1.582      | 0.1137  |
| 16  | rs11642873 | 84549206 | C  | ADD  | 7229  | 0.621    | 0.2192   | 0.4041  | 0.9541 | -2.174     | 0.02969 |
| 16  | 84549320   | 84549320 | C  | ADD  | 6243  | 0.693    | 0.2363   | 0.4361  | 1.101  | -1.552     | 0.1207  |
| 16  | rs6540238  | 84549328 | A  | ADD  | 7149  | 0.9844   | 0.04059  | 0.9092  | 1.066  | -0.3866    | 0.699   |
| 16  | rs12444486 | 84550150 | C  | ADD  | 7198  | 0.9619   | 0.03968  | 0.8899  | 1.04   | -0.9784    | 0.3279  |
| 16  | rs4843876  | 84550233 | T  | ADD  | 7285  | 0.9778   | 0.03986  | 0.9043  | 1.057  | -0.5624    | 0.5739  |
| 16  | rs11117428 | 84550330 | C  | ADD  | 7007  | 1.007    | 0.04388  | 0.924   | 1.097  | 0.1579     | 0.8745  |
| 16  | rs2361764  | 84550459 | G  | ADD  | 7161  | 0.9772   | 0.04008  | 0.9034  | 1.057  | -0.5757    | 0.5648  |
| 16  | 84550594   | 84550594 | O  | ADD  | 7293  | NA       | NA       | NA      | NA     | NA         | NA      |
| 16  | rs2361763  | 84550635 | T  | ADD  | 7207  | 1.024    | 0.04026  | 0.9459  | 1.108  | 0.5794     | 0.5623  |
| 16  | rs2885364  | 84550691 | A  | ADD  | 7188  | 0.976    | 0.04011  | 0.9022  | 1.056  | -0.6062    | 0.5444  |
| 16  | rs4843877  | 84550733 | C  | ADD  | 7174  | 0.9696   | 0.04015  | 0.8962  | 1.049  | -0.7684    | 0.4422  |
| 16  | rs35929052 | 84551985 | T  | ADD  | 6988  | 0.9022   | 0.08975  | 0.7566  | 1.076  | -1.147     | 0.2513  |
| 16  | rs908983   | 84552021 | C  | ADD  | 7282  | 0.9948   | 0.03915  | 0.9214  | 1.074  | -0.1323    | 0.8948  |
| 16  | rs883332   | 84552225 | C  | ADD  | 7291  | 1.129    | 0.2192   | 0.7346  | 1.735  | 0.5531     | 0.5802  |
| 16  | rs34347181 | 84552262 | O  | ADD  | 7291  | NA       | NA       | NA      | NA     | NA         | NA      |
| 16  | rs2049086  | 84552380 | T  | ADD  | 7014  | 0.9808   | 0.03999  | 0.9068  | 1.061  | -0.4855    | 0.6273  |
| 16  | rs908982   | 84552384 | A  | ADD  | 7033  | 0.9789   | 0.03986  | 0.9054  | 1.058  | -0.5344    | 0.5931  |
| 16  | 84552424   | 84552424 | O  | ADD  | 7293  | NA       | NA       | NA      | NA     | NA         | NA      |
| 16  | rs8044852  | 84552728 | A  | ADD  | 7197  | 0.9703   | 0.03901  | 0.8989  | 1.047  | -0.7735    | 0.4392  |
| 16  | rs908981   | 84552926 | T  | ADD  | 7275  | 0.9738   | 0.03884  | 0.9024  | 1.051  | -0.684     | 0.494   |
| 16  | 84552937   | 84552937 | C  | ADD  | 6829  | 0.9924   | 0.091    | 0.8303  | 1.186  | -0.08342   | 0.9335  |
| 16  | rs12446139 | 84553085 | G  | ADD  | 7275  | 0.9738   | 0.03884  | 0.9024  | 1.051  | -0.684     | 0.494   |
| 16  | 84553110   | 84553110 | C  | ADD  | 7219  | 0.9099   | 0.1179   | 0.7222  | 1.146  | -0.8008    | 0.4232  |
| 16  | rs12919427 | 84553160 | A  | ADD  | 7275  | 0.9738   | 0.03884  | 0.9024  | 1.051  | -0.684     | 0.494   |
| 16  | rs12930405 | 84553163 | C  | ADD  | 7275  | 0.9738   | 0.03884  | 0.9024  | 1.051  | -0.684     | 0.494   |
| 16  | rs11642456 | 84553581 | T  | ADD  | 7274  | 0.974    | 0.03884  | 0.9026  | 1.051  | -0.6776    | 0.498   |
| 16  | 84553752   | 84553752 | T  | ADD  | 7247  | 0.6979   | 1.416    | 0.04347 | 11.2   | -0.254     | 0.7995  |
| 16  | rs11649461 | 84553758 | C  | ADD  | 7052  | 0.9656   | 0.03921  | 0.8942  | 1.043  | -0.8921    | 0.3723  |
| 16  | 84553776   | 84553776 | T  | ADD  | 7281  | 1.322    | 0.6797   | 0.3489  | 5.008  | 0.4105     | 0.6814  |
| 16  | rs11645398 | 84553796 | G  | ADD  | 7132  | 0.9777   | 0.03944  | 0.905   | 1.056  | -0.5706    | 0.5683  |
| 16  | 84554094   | 84554094 | C  | ADD  | 7288  | 3.54E-10 | 2.44E+04 | 0       | inf    | -0.0008927 | 0.9993  |
| 16  | rs4843324  | 84554392 | O  | ADD  | 7279  | NA       | NA       | NA      | NA     | NA         | NA      |
| 16  | rs11643829 | 84554502 | C  | ADD  | 4744  | 0.9613   | 0.04871  | 0.8737  | 1.058  | -0.8113    | 0.4172  |
| 16  | rs35615495 | 84554505 | T  | ADD  | 5252  | 0.9071   | 0.06217  | 0.803   | 1.025  | -1.569     | 0.1167  |
| 16  | rs11640586 | 84554529 | C  | ADD  | 4335  | 1.107    | 0.05236  | 0.9993  | 1.227  | 1.947      | 0.05156 |
| 16  | rs59015387 | 84554628 | A  | ADD  | 7284  | 3.92E-10 | 2.44E+04 | 0       | inf    | -0.0008885 | 0.9993  |
| 16  | 84554776   | 84554776 | T  | ADD  | 7226  | 2.395    | 0.9269   | 0.3894  | 14.73  | 0.9424     | 0.346   |
| 16  | rs12019053 | 84554782 | G  | ADD  | 5108  | 0.8978   | 0.06238  | 0.7945  | 1.015  | -1.728     | 0.08393 |
| 16  | 84554944   | 84554944 | C  | ADD  | 3972  | 0.9301   | 0.05445  | 0.8359  | 1.035  | -1.331     | 0.1831  |
| 16  | 84554954   | 84554954 | C  | ADD  | 3559  | 0.9114   | 0.06058  | 0.8094  | 1.026  | -1.531     | 0.1258  |
| 16  | rs11860050 | 84555097 | A  | ADD  | 5173  | 0.9025   | 0.06278  | 0.798   | 1.021  | -1.634     | 0.1022  |
| 16  | 84555268   | 84555268 | O  | ADD  | 7292  | NA       | NA       | NA      | NA     | NA         | NA      |
| 16  | rs12446834 | 84555541 | C  | ADD  | 4624  | 0.9275   | 0.04932  | 0.8421  | 1.022  | -1.525     | 0.1272  |
| 16  | rs55906426 | 84555779 | C  | ADD  | 6163  | 1.016    | 0.04684  | 0.9269  | 1.114  | 0.3391     | 0.7345  |
| 16  | rs12019051 | 84555863 | G  | ADD  | 4621  | 0.9278   | 0.04932  | 0.8423  | 1.022  | -1.519     | 0.1287  |
| 16  | 84555917   | 84555917 | O  | ADD  | 7279  | NA       | NA       | NA      | NA     | NA         | NA      |
| 16  | 84556011   | 84556011 | O  | ADD  | 7283  | NA       | NA       | NA      | NA     | NA         | NA      |
| 16  | rs16940146 | 84556487 | G  | ADD  | 7285  | 9.172    | 1.101    | 1.06    | 79.33  | 2.013      | 0.0441  |

| CHR | SNP        | BP       | A1 | TEST | NMISS | OR       | SE       | L95     | U95    | STAT       | P       |
|-----|------------|----------|----|------|-------|----------|----------|---------|--------|------------|---------|
| 16  | 84556512   | 84556512 | 0  | ADD  | 7292  | NA       | NA       | NA      | NA     | NA         | NA      |
| 16  | rs34445961 | 84556804 | G  | ADD  | 3983  | 0.9897   | 0.05352  | 0.8911  | 1.099  | -0.1937    | 0.8464  |
| 16  | rs34256051 | 84556806 | C  | ADD  | 4007  | 0.9694   | 0.05336  | 0.8731  | 1.076  | -0.5827    | 0.5601  |
| 16  | 84556855   | 84556855 | T  | ADD  | 7281  | 8.51E-10 | 1.65E+04 | 0       | inf    | -0.001267  | 0.999   |
| 16  | rs62051883 | 84556897 | A  | ADD  | 7097  | 1.042    | 0.3419   | 0.5333  | 2.037  | 0.1207     | 0.9039  |
| 16  | rs59276136 | 84556910 | A  | ADD  | 4536  | 0.9208   | 0.0497   | 0.8353  | 1.015  | -1.661     | 0.0967  |
| 16  | 84557150   | 84557150 | 0  | ADD  | 7285  | NA       | NA       | NA      | NA     | NA         | NA      |
| 16  | rs11863308 | 84557298 | T  | ADD  | 7284  | 3.92E-10 | 2.44E+04 | 0       | inf    | -0.0008885 | 0.9993  |
| 16  | 84557332   | 84557332 | C  | ADD  | 6961  | 0.7318   | 0.3565   | 0.3639  | 1.472  | -0.8758    | 0.3811  |
| 16  | 84557466   | 84557466 | G  | ADD  | 7284  | 6.25E-10 | 1.18E+04 | 0       | inf    | -0.00179   | 0.9986  |
| 16  | rs12598292 | 84557532 | T  | ADD  | 5544  | 0.9192   | 0.2324   | 0.5829  | 1.45   | -0.3625    | 0.717   |
| 16  | rs8053185  | 84557593 | G  | ADD  | 4358  | 0.922    | 0.05118  | 0.834   | 1.019  | -1.587     | 0.1125  |
| 16  | rs12446659 | 84557863 | T  | ADD  | 4310  | 0.9138   | 0.05143  | 0.8261  | 1.011  | -1.754     | 0.0795  |
| 16  | rs35867147 | 84557883 | A  | ADD  | 5171  | 0.8868   | 0.06401  | 0.7822  | 1.005  | -1.878     | 0.06044 |
| 16  | 84557898   | 84557898 | 0  | ADD  | 7270  | NA       | NA       | NA      | NA     | NA         | NA      |
| 16  | rs12446684 | 84557908 | T  | ADD  | 4335  | 0.918    | 0.0513   | 0.8302  | 1.015  | -1.668     | 0.0953  |
| 16  | rs12444385 | 84557964 | A  | ADD  | 4306  | 0.9134   | 0.05145  | 0.8258  | 1.01   | -1.76      | 0.07835 |
| 16  | 84558091   | 84558091 | C  | ADD  | 4304  | 0.9144   | 0.05146  | 0.8267  | 1.011  | -1.739     | 0.08211 |
| 16  | rs9924246  | 84558107 | C  | ADD  | 4304  | 0.9144   | 0.05146  | 0.8267  | 1.011  | -1.739     | 0.08211 |
| 16  | 84558180   | 84558180 | C  | ADD  | 3142  | 0.9346   | 0.05957  | 0.8316  | 1.05   | -1.135     | 0.2563  |
| 16  | 84558188   | 84558188 | C  | ADD  | 3768  | 0.9357   | 0.05557  | 0.8392  | 1.043  | -1.196     | 0.2318  |
| 16  | rs9926350  | 84558192 | A  | ADD  | 2454  | 1.062    | 0.0717   | 0.9229  | 1.222  | 0.8415     | 0.4     |
| 16  | rs9934574  | 84558465 | T  | ADD  | 5147  | 0.8888   | 0.06412  | 0.7838  | 1.008  | -1.839     | 0.06599 |
| 16  | rs9941263  | 84558545 | G  | ADD  | 4308  | 0.9139   | 0.05151  | 0.8262  | 1.011  | -1.748     | 0.08051 |
| 16  | rs9934725  | 84558585 | T  | ADD  | 4307  | 0.9139   | 0.05151  | 0.8262  | 1.011  | -1.747     | 0.08062 |
| 16  | 84558619   | 84558619 | T  | ADD  | 7198  | 0.3481   | 0.7195   | 0.08496 | 1.426  | -1.467     | 0.1424  |
| 16  | rs9938885  | 84558713 | G  | ADD  | 4291  | 0.918    | 0.05168  | 0.8296  | 1.016  | -1.655     | 0.09794 |
| 16  | rs11648475 | 84558762 | G  | ADD  | 3549  | 0.8974   | 0.05289  | 0.809   | 0.9954 | -2.048     | 0.0406  |
| 16  | rs74032515 | 84558875 | G  | ADD  | 6961  | 0.7318   | 0.3565   | 0.3639  | 1.472  | -0.8758    | 0.3811  |
| 16  | rs74032517 | 84558990 | 0  | ADD  | 7292  | NA       | NA       | NA      | NA     | NA         | NA      |
| 16  | rs72807046 | 84559122 | T  | ADD  | 6406  | 0.8066   | 0.2188   | 0.5253  | 1.238  | -0.9825    | 0.3258  |
| 16  | 84559204   | 84559204 | C  | ADD  | 7273  | 2.621    | 1.119    | 0.2924  | 23.49  | 0.8611     | 0.3892  |
| 16  | 84559353   | 84559353 | A  | ADD  | 7136  | 2.785    | 1.222    | 0.254   | 30.54  | 0.8383     | 0.4018  |
| 16  | rs11860004 | 84559380 | A  | ADD  | 3819  | 0.897    | 0.0664   | 0.7875  | 1.022  | -1.638     | 0.1015  |
| 16  | rs34912238 | 84559404 | T  | ADD  | 6808  | 0.7664   | 0.1324   | 0.5912  | 0.9935 | -2.009     | 0.04452 |
| 16  | rs35655122 | 84559618 | T  | ADD  | 5193  | 0.8956   | 0.0639   | 0.7902  | 1.015  | -1.725     | 0.08444 |
| 16  | rs11862493 | 84559626 | C  | ADD  | 5192  | 0.8973   | 0.06392  | 0.7916  | 1.017  | -1.695     | 0.09002 |
| 16  | rs11859186 | 84559852 | C  | ADD  | 5000  | 0.9522   | 0.07109  | 0.8283  | 1.095  | -0.6896    | 0.4904  |

Table S5: Conditioning on rs8046526, rs450443, and rs4843869

| CHR | SNP        | BP       | A1 | TEST | NMISS | OR       | SE       | L95     | U95   | STAT      | P       |
|-----|------------|----------|----|------|-------|----------|----------|---------|-------|-----------|---------|
| 16  | rs11861580 | 84456048 | G  | ADD  | 7251  | 0.9444   | 0.07353  | 0.8177  | 1.091 | -0.7775   | 0.4369  |
| 16  | rs9934049  | 84456117 | T  | ADD  | 6001  | 1.069    | 0.09794  | 0.882   | 1.295 | 0.678     | 0.4978  |
| 16  | 84456852   | 84456852 | A  | ADD  | 7311  | 0.7176   | 0.3076   | 0.3927  | 1.311 | -1.079    | 0.2807  |
| 16  | 84457076   | 84457076 | T  | ADD  | 7296  | 1.96E+09 | 2.44E+04 | 0       | inf   | 0.0008777 | 0.9993  |
| 16  | rs16939834 | 84458109 | C  | ADD  | 7314  | 0.7761   | 0.2391   | 0.4857  | 1.24  | -1.06     | 0.289   |
| 16  | 84458146   | 84458146 | A  | ADD  | 7307  | 8.54E+08 | 1.72E+04 | 0       | inf   | 0.001194  | 0.999   |
| 16  | rs11864884 | 84458540 | T  | ADD  | 7308  | 1.034    | 0.03936  | 0.9571  | 1.117 | 0.8462    | 0.3975  |
| 16  | rs7185918  | 84458566 | T  | ADD  | 7314  | 0.995    | 0.04358  | 0.9135  | 1.084 | -0.1149   | 0.9085  |
| 16  | 84458726   | 84458726 | C  | ADD  | 7290  | 1.187    | 0.1957   | 0.8088  | 1.742 | 0.8761    | 0.381   |
| 16  | rs72805167 | 84458737 | G  | ADD  | 7140  | 1.245    | 0.4365   | 0.5293  | 2.93  | 0.5026    | 0.6152  |
| 16  | 84458834   | 84458834 | O  | ADD  | 6316  | NA       | NA       | NA      | NA    | NA        | NA      |
| 16  | rs11859433 | 84458903 | C  | ADD  | 7268  | 0.942    | 0.07465  | 0.8138  | 1.09  | -0.8009   | 0.4232  |
| 16  | 84459157   | 84459157 | G  | ADD  | 7003  | 0.9186   | 0.07657  | 0.7906  | 1.067 | -1.109    | 0.2675  |
| 16  | rs12926601 | 84459167 | T  | ADD  | 7041  | 1.052    | 0.04568  | 0.9622  | 1.151 | 1.117     | 0.2639  |
| 16  | rs4843854  | 84460016 | C  | ADD  | 7287  | 1.027    | 0.03745  | 0.9547  | 1.106 | 0.7222    | 0.4702  |
| 16  | rs4843855  | 84460047 | T  | ADD  | 6803  | 1.012    | 0.03957  | 0.9365  | 1.094 | 0.3016    | 0.763   |
| 16  | rs4843856  | 84460058 | C  | ADD  | 7291  | 1.027    | 0.03565  | 0.9574  | 1.101 | 0.7384    | 0.4603  |
| 16  | rs12930347 | 84461177 | C  | ADD  | 7309  | 1.034    | 0.04331  | 0.95    | 1.126 | 0.7762    | 0.4376  |
| 16  | 84461320   | 84461320 | O  | ADD  | 7314  | NA       | NA       | NA      | NA    | NA        | NA      |
| 16  | rs62052470 | 84461723 | A  | ADD  | 6770  | 0.9413   | 0.09927  | 0.7749  | 1.143 | -0.6094   | 0.5422  |
| 16  | 84461729   | 84461729 | O  | ADD  | 7317  | NA       | NA       | NA      | NA    | NA        | NA      |
| 16  | rs62052471 | 84462333 | G  | ADD  | 6564  | 0.9779   | 0.1178   | 0.7763  | 1.232 | -0.1901   | 0.8492  |
| 16  | 84462405   | 84462405 | A  | ADD  | 6232  | 1.004    | 0.0446   | 0.9199  | 1.096 | 0.08709   | 0.9306  |
| 16  | 84462407   | 84462407 | A  | ADD  | 5611  | 1.024    | 0.04916  | 0.9297  | 1.127 | 0.4768    | 0.6335  |
| 16  | 84462423   | 84462423 | A  | ADD  | 5117  | 0.9924   | 0.127    | 0.7738  | 1.273 | -0.05974  | 0.9524  |
| 16  | 84462425   | 84462425 | A  | ADD  | 3710  | 1.21     | 0.09401  | 1.006   | 1.455 | 2.026     | 0.04278 |
| 16  | 84462437   | 84462437 | C  | ADD  | 3946  | 1.119    | 0.09987  | 0.9199  | 1.361 | 1.124     | 0.2611  |
| 16  | 84462507   | 84462507 | C  | ADD  | 4948  | 1.266    | 0.1132   | 1.014   | 1.581 | 2.086     | 0.03698 |
| 16  | 84462539   | 84462539 | C  | ADD  | 7041  | 0.9105   | 0.1173   | 0.7235  | 1.146 | -0.8      | 0.4237  |
| 16  | rs55697192 | 84462546 | C  | ADD  | 5990  | 1.05     | 0.07456  | 0.9071  | 1.215 | 0.6521    | 0.5143  |
| 16  | 84463073   | 84463073 | A  | ADD  | 6628  | 1.42     | 0.2291   | 0.9064  | 2.225 | 1.531     | 0.1258  |
| 16  | 84463237   | 84463237 | T  | ADD  | 7155  | 0.8878   | 0.196    | 0.6046  | 1.303 | -0.6075   | 0.5435  |
| 16  | rs12935659 | 84463429 | C  | ADD  | 7293  | 1.004    | 0.03904  | 0.9302  | 1.084 | 0.107     | 0.9148  |
| 16  | 84463607   | 84463607 | O  | ADD  | 7318  | NA       | NA       | NA      | NA    | NA        | NA      |
| 16  | rs72805168 | 84463633 | C  | ADD  | 7185  | 1.319    | 0.9669   | 0.1983  | 8.777 | 0.2865    | 0.7745  |
| 16  | rs62052474 | 84463910 | A  | ADD  | 7286  | 0.9042   | 0.07287  | 0.7839  | 1.043 | -1.382    | 0.167   |
| 16  | 84463953   | 84463953 | T  | ADD  | 7272  | 0.8663   | 1.416    | 0.05403 | 13.89 | -0.1014   | 0.9192  |
| 16  | 84463987   | 84463987 | O  | ADD  | 7318  | NA       | NA       | NA      | NA    | NA        | NA      |
| 16  | 84464105   | 84464105 | O  | ADD  | 7318  | NA       | NA       | NA      | NA    | NA        | NA      |
| 16  | rs11648716 | 84464117 | G  | ADD  | 7317  | 0.9178   | 0.07166  | 0.7975  | 1.056 | -1.197    | 0.2314  |
| 16  | rs8056522  | 84464397 | C  | ADD  | 7308  | 1.003    | 0.04437  | 0.9196  | 1.094 | 0.07185   | 0.9427  |
| 16  | rs9929675  | 84464599 | A  | ADD  | 7286  | 1.009    | 0.0393   | 0.9339  | 1.089 | 0.2208    | 0.8253  |
| 16  | rs9929701  | 84464675 | C  | ADD  | 7287  | 1.009    | 0.0393   | 0.9341  | 1.09  | 0.2264    | 0.8209  |
| 16  | rs9924234  | 84465076 | C  | ADD  | 7291  | 1.01     | 0.03929  | 0.9354  | 1.091 | 0.261     | 0.7941  |
| 16  | rs9930043  | 84465079 | C  | ADD  | 7297  | 1.009    | 0.03927  | 0.9343  | 1.09  | 0.2288    | 0.819   |
| 16  | 84465151   | 84465151 | C  | ADD  | 7257  | 1.044    | 0.04457  | 0.9568  | 1.139 | 0.9697    | 0.3322  |
| 16  | rs9932359  | 84465411 | A  | ADD  | 7290  | 1.01     | 0.03929  | 0.9352  | 1.091 | 0.2558    | 0.7981  |
| 16  | rs12448297 | 84467210 | O  | ADD  | 7318  | NA       | NA       | NA      | NA    | NA        | NA      |
| 16  | rs13336885 | 84469034 | C  | ADD  | 7171  | 1.012    | 0.03945  | 0.9366  | 1.093 | 0.2983    | 0.7654  |
| 16  | rs7200396  | 84469798 | C  | ADD  | 7291  | 1.003    | 0.03901  | 0.9289  | 1.082 | 0.06917   | 0.9449  |
| 16  | rs9923975  | 84469936 | G  | ADD  | 7277  | 1.018    | 0.04469  | 0.9324  | 1.111 | 0.3927    | 0.6946  |
| 16  | rs9932159  | 84470103 | T  | ADD  | 7292  | 1.004    | 0.03913  | 0.9299  | 1.084 | 0.1021    | 0.9187  |

| CHR | SNP        | BP       | A1 | TEST | NMISS | OR       | SE       | L95    | U95   | STAT       | P       |
|-----|------------|----------|----|------|-------|----------|----------|--------|-------|------------|---------|
| 16  | rs9936199  | 84470118 | G  | ADD  | 7294  | 1.003    | 0.03901  | 0.9291 | 1.083 | 0.07508    | 0.9402  |
| 16  | rs750669   | 84470371 | G  | ADD  | 7247  | 1.022    | 0.03582  | 0.953  | 1.097 | 0.6168     | 0.5374  |
| 16  | rs2017161  | 84470594 | C  | ADD  | 7151  | 0.9957   | 0.03918  | 0.9221 | 1.075 | -0.1106    | 0.9119  |
| 16  | 84470606   | 84470606 | A  | ADD  | 7278  | 1.017    | 0.03562  | 0.9487 | 1.091 | 0.4805     | 0.6309  |
| 16  | 84471137   | 84471137 | G  | ADD  | 7293  | 7.45E+08 | 1.72E+04 | 0      | inf   | 0.001185   | 0.9991  |
| 16  | 84471981   | 84471981 | T  | ADD  | 6578  | 0.9624   | 0.1364   | 0.7366 | 1.257 | -0.2811    | 0.7787  |
| 16  | 84472217   | 84472217 | T  | ADD  | 6894  | 4.18E-10 | 2.44E+04 | 0      | inf   | -0.0008859 | 0.9993  |
| 16  | rs55967832 | 84472469 | C  | ADD  | 7085  | 1.013    | 0.03603  | 0.9443 | 1.088 | 0.3704     | 0.7111  |
| 16  | rs9925103  | 84472609 | G  | ADD  | 6989  | 0.8358   | 0.236    | 0.5263 | 1.327 | -0.7599    | 0.4473  |
| 16  | rs34318854 | 84472707 | C  | ADD  | 7084  | 1.013    | 0.03603  | 0.9443 | 1.088 | 0.37       | 0.7114  |
| 16  | rs34723871 | 84472711 | C  | ADD  | 7084  | 1.013    | 0.03603  | 0.9443 | 1.088 | 0.37       | 0.7114  |
| 16  | rs56143130 | 84472719 | C  | ADD  | 7084  | 1.013    | 0.03603  | 0.9443 | 1.088 | 0.37       | 0.7114  |
| 16  | rs9925282  | 84472806 | O  | ADD  | 7318  | NA       | NA       | NA     | NA    | NA         | NA      |
| 16  | rs9931862  | 84472878 | T  | ADD  | 7088  | 1.033    | 0.04504  | 0.9454 | 1.128 | 0.7141     | 0.4752  |
| 16  | rs9931687  | 84473282 | A  | ADD  | 7299  | 1.053    | 0.04456  | 0.9654 | 1.15  | 1.169      | 0.2426  |
| 16  | rs6540231  | 84473561 | G  | ADD  | 7276  | 1.003    | 0.0355   | 0.9359 | 1.076 | 0.09223    | 0.9265  |
| 16  | 84473745   | 84473745 | O  | ADD  | 6326  | NA       | NA       | NA     | NA    | NA         | NA      |
| 16  | 84474001   | 84474001 | C  | ADD  | 6332  | 0.9581   | 0.04586  | 0.8757 | 1.048 | -0.9331    | 0.3507  |
| 16  | 84474531   | 84474531 | C  | ADD  | 6630  | 0.8486   | 0.8693   | 0.1544 | 4.663 | -0.1889    | 0.8502  |
| 16  | rs367170   | 84474588 | A  | ADD  | 4784  | 1.165    | 0.09906  | 0.9598 | 1.415 | 1.546      | 0.1221  |
| 16  | rs409219   | 84474592 | T  | ADD  | 4708  | 1.322    | 0.121    | 1.043  | 1.676 | 2.309      | 0.02093 |
| 16  | 84474714   | 84474714 | C  | ADD  | 5003  | 1.038    | 0.05853  | 0.9251 | 1.164 | 0.6294     | 0.5291  |
| 16  | rs62052475 | 84474717 | C  | ADD  | 5012  | 1.039    | 0.05832  | 0.9269 | 1.165 | 0.6585     | 0.5102  |
| 16  | 84474721   | 84474721 | C  | ADD  | 5688  | 1.054    | 0.1606   | 0.7696 | 1.444 | 0.3288     | 0.7423  |
| 16  | rs426900   | 84474799 | C  | ADD  | 6690  | 0.9844   | 0.07811  | 0.8447 | 1.147 | -0.2013    | 0.8405  |
| 16  | rs9937847  | 84475052 | C  | ADD  | 7303  | 0.9631   | 0.06752  | 0.8437 | 1.099 | -0.5562    | 0.5781  |
| 16  | rs16939877 | 84475320 | A  | ADD  | 6745  | 0.829    | 0.1122   | 0.6654 | 1.033 | -1.672     | 0.09445 |
| 16  | rs376783   | 84475324 | A  | ADD  | 7310  | 1.051    | 0.04275  | 0.9664 | 1.143 | 1.162      | 0.2454  |
| 16  | rs428578   | 84475445 | G  | ADD  | 7218  | 1.005    | 0.03663  | 0.9349 | 1.079 | 0.1235     | 0.9017  |
| 16  | 84475528   | 84475528 | A  | ADD  | 6954  | 0.916    | 0.2088   | 0.6084 | 1.379 | -0.42      | 0.6745  |
| 16  | rs371800   | 84475621 | T  | ADD  | 7291  | 1.095    | 0.09307  | 0.9123 | 1.314 | 0.974      | 0.3301  |
| 16  | rs447377   | 84476336 | G  | ADD  | 7288  | 1.002    | 0.03648  | 0.933  | 1.076 | 0.05964    | 0.9524  |
| 16  | rs9936406  | 84476343 | T  | ADD  | 7312  | 0.987    | 0.03738  | 0.9173 | 1.062 | -0.349     | 0.7271  |
| 16  | 84476544   | 84476544 | C  | ADD  | 7255  | 0.953    | 0.07039  | 0.8302 | 1.094 | -0.6844    | 0.4937  |
| 16  | rs439390   | 84476707 | G  | ADD  | 7055  | 0.9903   | 0.03705  | 0.9209 | 1.065 | -0.2635    | 0.7921  |
| 16  | 84476754   | 84476754 | C  | ADD  | 7275  | 0.9035   | 0.089    | 0.7589 | 1.076 | -1.14      | 0.2542  |
| 16  | rs9928868  | 84476971 | C  | ADD  | 7274  | 0.971    | 0.5999   | 0.2997 | 3.147 | -0.04899   | 0.9609  |
| 16  | rs384915   | 84477113 | A  | ADD  | 7258  | 1.063    | 0.09561  | 0.8817 | 1.283 | 0.6427     | 0.5204  |
| 16  | 84477167   | 84477167 | C  | ADD  | 4668  | 0.9499   | 0.07728  | 0.8164 | 1.105 | -0.6655    | 0.5058  |
| 16  | 84477725   | 84477725 | A  | ADD  | 7308  | 4.138    | 1.286    | 0.333  | 51.42 | 1.105      | 0.2693  |
| 16  | rs438968   | 84477729 | C  | ADD  | 7268  | 1.003    | 0.03636  | 0.9336 | 1.077 | 0.0691     | 0.9449  |
| 16  | rs12596376 | 84477898 | C  | ADD  | 7198  | 0.9992   | 0.04028  | 0.9233 | 1.081 | -0.02022   | 0.9839  |
| 16  | rs370703   | 84477981 | T  | ADD  | 7307  | 1.003    | 0.03634  | 0.9345 | 1.078 | 0.09485    | 0.9244  |
| 16  | 84478065   | 84478065 | G  | ADD  | 7292  | 0.5909   | 0.7961   | 0.1241 | 2.813 | -0.6609    | 0.5087  |
| 16  | rs395922   | 84478180 | C  | ADD  | 6914  | 1.012    | 0.09708  | 0.8368 | 1.224 | 0.1246     | 0.9008  |
| 16  | rs6540232  | 84478303 | C  | ADD  | 7216  | 0.9922   | 0.03757  | 0.9217 | 1.068 | -0.2088    | 0.8346  |
| 16  | 84478601   | 84478601 | C  | ADD  | 7293  | 1.089    | 0.09736  | 0.9002 | 1.319 | 0.8803     | 0.3787  |
| 16  | rs448136   | 84478848 | C  | ADD  | 6933  | 0.9853   | 0.03652  | 0.9173 | 1.058 | -0.4041    | 0.6861  |
| 16  | 84478905   | 84478905 | C  | ADD  | 7313  | 0.7877   | 0.2996   | 0.4378 | 1.417 | -0.7963    | 0.4259  |
| 16  | rs11642286 | 84479110 | G  | ADD  | 7314  | 0.8877   | 0.08644  | 0.7494 | 1.052 | -1.378     | 0.1682  |
| 16  | rs391821   | 84479528 | T  | ADD  | 7014  | 0.9592   | 0.09725  | 0.7927 | 1.161 | -0.4282    | 0.6685  |
| 16  | rs428530   | 84480360 | G  | ADD  | 7261  | 1.064    | 0.09375  | 0.8857 | 1.279 | 0.665      | 0.506   |

| CHR | SNP        | BP       | A1 | TEST | NMISS | OR       | SE       | L95    | U95   | STAT     | P      |
|-----|------------|----------|----|------|-------|----------|----------|--------|-------|----------|--------|
| 16  | rs11866609 | 84480582 | G  | ADD  | 7316  | 1.422    | 0.4049   | 0.6432 | 3.145 | 0.87     | 0.3843 |
| 16  | rs421710   | 84481015 | C  | ADD  | 7314  | 0.9992   | 0.03632  | 0.9306 | 1.073 | -0.02113 | 0.9831 |
| 16  | rs9308363  | 84481566 | C  | ADD  | 7273  | 0.9892   | 0.03711  | 0.9198 | 1.064 | -0.2937  | 0.769  |
| 16  | 84481963   | 84481963 | A  | ADD  | 6823  | 0.7797   | 0.3363   | 0.4034 | 1.507 | -0.7398  | 0.4594 |
| 16  | rs433322   | 84482073 | G  | ADD  | 7255  | 1.003    | 0.03632  | 0.934  | 1.077 | 0.07861  | 0.9373 |
| 16  | rs11860464 | 84482464 | T  | ADD  | 7166  | 0.9457   | 0.5265   | 0.337  | 2.654 | -0.106   | 0.9156 |
| 16  | 84482479   | 84482479 | C  | ADD  | 7267  | 0.9899   | 0.03713  | 0.9204 | 1.065 | -0.2746  | 0.7836 |
| 16  | 84482626   | 84482626 | O  | ADD  | 7039  | NA       | NA       | NA     | NA    | NA       | NA     |
| 16  | rs401528   | 84482872 | G  | ADD  | 7229  | 1.081    | 0.09048  | 0.9052 | 1.291 | 0.8594   | 0.3901 |
| 16  | rs7193803  | 84483174 | G  | ADD  | 7315  | 0.9886   | 0.03714  | 0.9192 | 1.063 | -0.3094  | 0.757  |
| 16  | 84483336   | 84483336 | O  | ADD  | 7306  | NA       | NA       | NA     | NA    | NA       | NA     |
| 16  | rs11117411 | 84483439 | T  | ADD  | 7231  | 0.8953   | 0.08919  | 0.7517 | 1.066 | -1.24    | 0.2149 |
| 16  | rs437740   | 84483537 | C  | ADD  | 7291  | 1.067    | 0.09469  | 0.8863 | 1.285 | 0.6859   | 0.4928 |
| 16  | 84483596   | 84483596 | A  | ADD  | 7113  | 0.8824   | 0.2126   | 0.5817 | 1.339 | -0.5883  | 0.5563 |
| 16  | rs438323   | 84483902 | C  | ADD  | 7290  | 1.076    | 0.09478  | 0.8933 | 1.295 | 0.7698   | 0.4414 |
| 16  | rs12922615 | 84484196 | T  | ADD  | 7221  | 0.9291   | 0.07146  | 0.8077 | 1.069 | -1.029   | 0.3033 |
| 16  | rs394100   | 84484220 | A  | ADD  | 7111  | 1.039    | 0.09143  | 0.8682 | 1.242 | 0.4145   | 0.6785 |
| 16  | rs395498   | 84484222 | G  | ADD  | 7232  | 1.01     | 0.03642  | 0.9407 | 1.085 | 0.2815   | 0.7783 |
| 16  | rs452478   | 84484245 | G  | ADD  | 7290  | 1.07     | 0.09464  | 0.8885 | 1.288 | 0.7104   | 0.4774 |
| 16  | rs452532   | 84484267 | G  | ADD  | 7289  | 1.075    | 0.09476  | 0.8927 | 1.294 | 0.7618   | 0.4462 |
| 16  | rs11117412 | 84484343 | A  | ADD  | 7022  | 1.019    | 0.04108  | 0.9403 | 1.105 | 0.4627   | 0.6436 |
| 16  | rs434216   | 84484514 | C  | ADD  | 6969  | 0.9992   | 0.03673  | 0.9298 | 1.074 | -0.02219 | 0.9823 |
| 16  | rs1809094  | 84484727 | A  | ADD  | 6633  | 0.9944   | 0.04478  | 0.9109 | 1.086 | -0.1244  | 0.901  |
| 16  | 84484809   | 84484809 | G  | ADD  | 7183  | 1.484    | 0.3736   | 0.7134 | 3.085 | 1.056    | 0.291  |
| 16  | rs572967   | 84484995 | G  | ADD  | 7183  | 1.005    | 0.03706  | 0.9344 | 1.08  | 0.128    | 0.8982 |
| 16  | rs896263   | 84485020 | G  | ADD  | 7311  | 1.014    | 0.04086  | 0.9357 | 1.098 | 0.3345   | 0.738  |
| 16  | rs403605   | 84485129 | A  | ADD  | 7304  | 0.9341   | 0.06096  | 0.8289 | 1.053 | -1.118   | 0.2634 |
| 16  | rs454128   | 84485236 | G  | ADD  | 6968  | 1.035    | 0.04077  | 0.9554 | 1.121 | 0.8406   | 0.4006 |
| 16  | rs391023   | 84485315 | T  | ADD  | 7265  | 1.03     | 0.03651  | 0.9584 | 1.106 | 0.7965   | 0.4257 |
| 16  | rs375288   | 84485372 | A  | ADD  | 7200  | 1.02     | 0.03737  | 0.9476 | 1.097 | 0.5191   | 0.6037 |
| 16  | rs446836   | 84485520 | T  | ADD  | 6970  | 0.7359   | 0.3006   | 0.4083 | 1.326 | -1.02    | 0.3077 |
| 16  | rs873616   | 84485667 | G  | ADD  | 6993  | 1.054    | 0.04672  | 0.9616 | 1.155 | 1.122    | 0.262  |
| 16  | 84485701   | 84485701 | O  | ADD  | 7317  | NA       | NA       | NA     | NA    | NA       | NA     |
| 16  | rs60241040 | 84486065 | G  | ADD  | 7247  | 1.036    | 0.04573  | 0.9468 | 1.133 | 0.7654   | 0.444  |
| 16  | rs391855   | 84486122 | T  | ADD  | 7307  | 1.043    | 0.03865  | 0.9671 | 1.125 | 1.095    | 0.2735 |
| 16  | rs12149363 | 84486206 | G  | ADD  | 7243  | 0.9286   | 0.07139  | 0.8073 | 1.068 | -1.038   | 0.2992 |
| 16  | rs386098   | 84486701 | A  | ADD  | 7119  | 0.9342   | 0.07001  | 0.8144 | 1.072 | -0.9723  | 0.3309 |
| 16  | rs369173   | 84486783 | G  | ADD  | 7312  | 1.04     | 0.03798  | 0.9656 | 1.121 | 1.039    | 0.299  |
| 16  | rs398114   | 84486785 | C  | ADD  | 7099  | 1.041    | 0.03893  | 0.9643 | 1.123 | 1.026    | 0.3049 |
| 16  | rs369597   | 84486935 | C  | ADD  | 7301  | 0.9286   | 0.06957  | 0.8102 | 1.064 | -1.064   | 0.2871 |
| 16  | rs9924391  | 84487331 | T  | ADD  | 7310  | 0.9169   | 0.07053  | 0.7986 | 1.053 | -1.229   | 0.2189 |
| 16  | rs9932449  | 84487333 | A  | ADD  | 7309  | 0.9224   | 0.06947  | 0.805  | 1.057 | -1.163   | 0.2448 |
| 16  | rs371391   | 84487395 | C  | ADD  | 7307  | 0.9342   | 0.06978  | 0.8148 | 1.071 | -0.9757  | 0.3292 |
| 16  | rs388405   | 84487398 | A  | ADD  | 7316  | 0.9191   | 0.06921  | 0.8025 | 1.053 | -1.218   | 0.2231 |
| 16  | rs28368111 | 84487756 | C  | ADD  | 7278  | 1.64     | 0.4193   | 0.7212 | 3.731 | 1.18     | 0.2378 |
| 16  | 84487779   | 84487779 | T  | ADD  | 7261  | 8.59E+08 | 1.72E+04 | 0      | inf   | 0.001194 | 0.999  |
| 16  | rs381139   | 84487901 | C  | ADD  | 7205  | 0.9275   | 0.07078  | 0.8074 | 1.066 | -1.063   | 0.2878 |
| 16  | rs393512   | 84488072 | C  | ADD  | 7264  | 0.9084   | 0.0691   | 0.7933 | 1.04  | -1.391   | 0.1643 |
| 16  | rs416515   | 84488175 | C  | ADD  | 7258  | 0.9197   | 0.0706   | 0.8008 | 1.056 | -1.186   | 0.2356 |
| 16  | rs398229   | 84488191 | A  | ADD  | 7258  | 0.9197   | 0.0706   | 0.8008 | 1.056 | -1.186   | 0.2356 |
| 16  | 84488361   | 84488361 | C  | ADD  | 1962  | 1.133    | 0.1239   | 0.889  | 1.445 | 1.01     | 0.3123 |
| 16  | 84488362   | 84488362 | C  | ADD  | 3725  | 1.022    | 0.1216   | 0.8051 | 1.297 | 0.1775   | 0.8591 |



| CHR | SNP        | BP       | A1 | TEST | NMISS | OR     | SE      | L95     | U95   | STAT    | P       |
|-----|------------|----------|----|------|-------|--------|---------|---------|-------|---------|---------|
| 16  | rs28368112 | 84488458 | C  | ADD  | 6916  | 1.059  | 0.04576 | 0.9685  | 1.159 | 1.26    | 0.2077  |
| 16  | 84488780   | 84488780 | C  | ADD  | 7038  | 0.5578 | 0.3289  | 0.2927  | 1.063 | -1.775  | 0.07592 |
| 16  | rs170033   | 84489005 | A  | ADD  | 6592  | 0.9708 | 0.06699 | 0.8514  | 1.107 | -0.442  | 0.6585  |
| 16  | 84489382   | 84489382 | 0  | ADD  | 7317  | NA     | NA      | NA      | NA    | NA      | NA      |
| 16  | rs4843859  | 84489457 | G  | ADD  | 7237  | 1.043  | 0.04436 | 0.9563  | 1.138 | 0.9526  | 0.3408  |
| 16  | rs8058349  | 84489530 | G  | ADD  | 7286  | 0.8686 | 0.07206 | 0.7542  | 1     | -1.955  | 0.05061 |
| 16  | rs191022   | 84489633 | G  | ADD  | 7188  | 1.008  | 0.04085 | 0.9305  | 1.092 | 0.1967  | 0.8441  |
| 16  | rs188602   | 84489852 | T  | ADD  | 7168  | 0.9073 | 0.07056 | 0.7901  | 1.042 | -1.379  | 0.168   |
| 16  | rs422186   | 84489971 | A  | ADD  | 7272  | 0.9081 | 0.07103 | 0.7901  | 1.044 | -1.358  | 0.1746  |
| 16  | rs56177354 | 84490153 | T  | ADD  | 6621  | 0.73   | 0.299   | 0.4063  | 1.312 | -1.053  | 0.2926  |
| 16  | rs2270501  | 84490489 | T  | ADD  | 7309  | 1.049  | 0.04606 | 0.9586  | 1.148 | 1.042   | 0.2973  |
| 16  | rs2270502  | 84490539 | T  | ADD  | 7133  | 0.8944 | 0.07621 | 0.7703  | 1.038 | -1.465  | 0.1429  |
| 16  | 84490567   | 84490567 | 0  | ADD  | 7309  | NA     | NA      | NA      | NA    | NA      | NA      |
| 16  | 84490724   | 84490724 | A  | ADD  | 7260  | 0.5789 | 1.27    | 0.04808 | 6.97  | -0.4306 | 0.6668  |
| 16  | 84491082   | 84491082 | A  | ADD  | 7231  | 1.142  | 0.09931 | 0.9402  | 1.388 | 1.339   | 0.1805  |
| 16  | rs56196648 | 84491219 | A  | ADD  | 6539  | 0.8858 | 0.1385  | 0.6753  | 1.162 | -0.8755 | 0.3813  |
| 16  | rs305084   | 84491669 | C  | ADD  | 7248  | 1.126  | 0.06093 | 0.9993  | 1.269 | 1.948   | 0.05143 |
| 16  | rs12447817 | 84491725 | A  | ADD  | 5147  | 1.104  | 0.1507  | 0.8216  | 1.483 | 0.6558  | 0.5119  |
| 16  | 84491886   | 84491886 | G  | ADD  | 7278  | 2.489  | 0.3893  | 1.16    | 5.339 | 2.342   | 0.01918 |
| 16  | 84491947   | 84491947 | 0  | ADD  | 7318  | NA     | NA      | NA      | NA    | NA      | NA      |
| 16  | 84492016   | 84492016 | C  | ADD  | 7118  | 0.9205 | 0.07455 | 0.7953  | 1.065 | -1.111  | 0.2665  |
| 16  | rs1519978  | 84492712 | T  | ADD  | 7287  | 1.171  | 0.07263 | 1.015   | 1.35  | 2.169   | 0.03008 |
| 16  | rs16939906 | 84493007 | A  | ADD  | 7242  | 1.303  | 0.581   | 0.4172  | 4.069 | 0.4553  | 0.6489  |
| 16  | 84493033   | 84493033 | C  | ADD  | 5807  | 0.7975 | 0.2738  | 0.4663  | 1.364 | -0.8261 | 0.4088  |
| 16  | rs16882    | 84493074 | C  | ADD  | 7305  | 1.168  | 0.07201 | 1.014   | 1.345 | 2.151   | 0.03144 |
| 16  | rs11649549 | 84493298 | C  | ADD  | 7297  | 1.159  | 0.07212 | 1.006   | 1.335 | 2.049   | 0.04044 |
| 16  | rs305083   | 84493379 | G  | ADD  | 7176  | 1.143  | 0.07238 | 0.9915  | 1.317 | 1.842   | 0.06553 |
| 16  | rs12924316 | 84493764 | T  | ADD  | 7312  | 1.034  | 0.04592 | 0.9448  | 1.131 | 0.7233  | 0.4695  |
| 16  | 84493893   | 84493893 | C  | ADD  | 4237  | 1.151  | 0.06437 | 1.015   | 1.306 | 2.184   | 0.02899 |
| 16  | 84493900   | 84493900 | C  | ADD  | 4300  | 1.149  | 0.06419 | 1.014   | 1.304 | 2.17    | 0.03001 |
| 16  | 84493903   | 84493903 | C  | ADD  | 4301  | 1.145  | 0.06416 | 1.01    | 1.299 | 2.113   | 0.03456 |
| 16  | 84493958   | 84493958 | C  | ADD  | 7292  | 1.379  | 0.4368  | 0.5859  | 3.247 | 0.7363  | 0.4616  |
| 16  | 84494383   | 84494383 | T  | ADD  | 7148  | 0.8729 | 0.1949  | 0.5958  | 1.279 | -0.6975 | 0.4855  |
| 16  | rs305082   | 84494479 | C  | ADD  | 7308  | 1.159  | 0.07075 | 1.009   | 1.331 | 2.081   | 0.03741 |
| 16  | 84494689   | 84494689 | 0  | ADD  | 7297  | NA     | NA      | NA      | NA    | NA      | NA      |
| 16  | 84494863   | 84494863 | C  | ADD  | 7281  | 1.169  | 0.09684 | 0.9673  | 1.414 | 1.617   | 0.1059  |
| 16  | 84495087   | 84495087 | T  | ADD  | 7146  | 2.545  | 0.9193  | 0.4199  | 15.42 | 1.016   | 0.3096  |
| 16  | rs182511   | 84495157 | G  | ADD  | 7315  | 1.206  | 0.1306  | 0.9332  | 1.557 | 1.431   | 0.1525  |
| 16  | 84495288   | 84495288 | 0  | ADD  | 6945  | NA     | NA      | NA      | NA    | NA      | NA      |
| 16  | 84495780   | 84495780 | A  | ADD  | 7297  | 1.358  | 1.074   | 0.1656  | 11.15 | 0.2853  | 0.7754  |
| 16  | 84495918   | 84495918 | C  | ADD  | 4677  | 1.193  | 0.1673  | 0.8593  | 1.655 | 1.053   | 0.2921  |
| 16  | 84495937   | 84495937 | C  | ADD  | 5763  | 0.8775 | 0.1119  | 0.7047  | 1.093 | -1.168  | 0.2428  |
| 16  | 84495977   | 84495977 | C  | ADD  | 7031  | 0.9246 | 0.185   | 0.6433  | 1.329 | -0.4239 | 0.6716  |
| 16  | rs11642583 | 84496096 | G  | ADD  | 7275  | 1.124  | 0.1058  | 0.9136  | 1.383 | 1.106   | 0.2689  |
| 16  | rs9940980  | 84496182 | T  | ADD  | 7314  | 1.137  | 0.1052  | 0.9251  | 1.397 | 1.22    | 0.2224  |
| 16  | rs9926664  | 84496256 | G  | ADD  | 7291  | 1.143  | 0.1054  | 0.93    | 1.406 | 1.271   | 0.2037  |
| 16  | rs11646550 | 84496336 | A  | ADD  | 7270  | 1.153  | 0.1094  | 0.9307  | 1.429 | 1.303   | 0.1925  |
| 16  | 84496676   | 84496676 | 0  | ADD  | 7307  | NA     | NA      | NA      | NA    | NA      | NA      |
| 16  | 84496724   | 84496724 | 0  | ADD  | 7317  | NA     | NA      | NA      | NA    | NA      | NA      |
| 16  | 84496745   | 84496745 | C  | ADD  | 7027  | 1.363  | 1.074   | 0.1661  | 11.19 | 0.2884  | 0.773   |
| 16  | 84496751   | 84496751 | C  | ADD  | 7027  | 1.363  | 1.074   | 0.1661  | 11.19 | 0.2884  | 0.773   |
| 16  | rs3794662  | 84497151 | A  | ADD  | 7301  | 1.178  | 0.09642 | 0.9749  | 1.423 | 1.697   | 0.08973 |

| CHR | SNP        | BP       | A1 | TEST | NMISS | OR     | SE      | L95    | U95   | STAT     | P       |
|-----|------------|----------|----|------|-------|--------|---------|--------|-------|----------|---------|
| 16  | 84497159   | 84497159 | 0  | ADD  | 7310  | NA     | NA      | NA     | NA    | NA       | NA      |
| 16  | rs3794661  | 84497167 | A  | ADD  | 7274  | 1.145  | 0.09704 | 0.947  | 1.385 | 1.399    | 0.1619  |
| 16  | rs62052556 | 84497511 | T  | ADD  | 7239  | 1.15   | 0.1167  | 0.9147 | 1.446 | 1.197    | 0.2315  |
| 16  | 84497894   | 84497894 | G  | ADD  | 7208  | 0.9874 | 0.7357  | 0.2335 | 4.176 | -0.01722 | 0.9863  |
| 16  | 84497914   | 84497914 | G  | ADD  | 7208  | 0.9874 | 0.7357  | 0.2335 | 4.176 | -0.01722 | 0.9863  |
| 16  | 84498477   | 84498477 | G  | ADD  | 7038  | 0.9092 | 0.1304  | 0.7042 | 1.174 | -0.7302  | 0.4653  |
| 16  | rs4843320  | 84498514 | T  | ADD  | 7188  | 1.014  | 0.04821 | 0.923  | 1.115 | 0.2974   | 0.7662  |
| 16  | 84498527   | 84498527 | A  | ADD  | 7129  | 0.8741 | 0.1949  | 0.5966 | 1.281 | -0.6904  | 0.4899  |
| 16  | 84498533   | 84498533 | T  | ADD  | 7043  | 0.9742 | 0.3046  | 0.5362 | 1.77  | -0.08585 | 0.9316  |
| 16  | 84499184   | 84499184 | G  | ADD  | 7270  | 1.487  | 0.505   | 0.5527 | 4     | 0.7856   | 0.4321  |
| 16  | rs305080   | 84499275 | T  | ADD  | 7216  | 1.058  | 0.04331 | 0.9715 | 1.151 | 1.291    | 0.1965  |
| 16  | 84499414   | 84499414 | G  | ADD  | 7102  | 1.216  | 0.1806  | 0.8538 | 1.733 | 1.085    | 0.2779  |
| 16  | rs10514610 | 84499676 | C  | ADD  | 7316  | 1.144  | 0.09337 | 0.9527 | 1.374 | 1.441    | 0.1497  |
| 16  | rs16939917 | 84499921 | A  | ADD  | 7258  | 1.163  | 0.0935  | 0.968  | 1.396 | 1.612    | 0.107   |
| 16  | rs305079   | 84499997 | C  | ADD  | 7306  | 1.211  | 0.0909  | 1.013  | 1.447 | 2.104    | 0.03535 |
| 16  | 84500417   | 84500417 | 0  | ADD  | 7285  | NA     | NA      | NA     | NA    | NA       | NA      |
| 16  | rs305078   | 84500644 | G  | ADD  | 7284  | 2.348  | 0.5966  | 0.7292 | 7.56  | 1.431    | 0.1525  |
| 16  | rs3794660  | 84500669 | C  | ADD  | 7234  | 1.132  | 0.1001  | 0.9308 | 1.378 | 1.243    | 0.2138  |
| 16  | 84500726   | 84500726 | T  | ADD  | 7129  | 0.8737 | 0.1949  | 0.5963 | 1.28  | -0.6928  | 0.4884  |
| 16  | rs305077   | 84500967 | C  | ADD  | 7311  | 1.088  | 0.04288 | 1      | 1.183 | 1.961    | 0.04986 |
| 16  | 84501753   | 84501753 | 0  | ADD  | 7310  | NA     | NA      | NA     | NA    | NA       | NA      |
| 16  | 84501767   | 84501767 | 0  | ADD  | 7310  | NA     | NA      | NA     | NA    | NA       | NA      |
| 16  | 84501890   | 84501890 | 0  | ADD  | 7318  | NA     | NA      | NA     | NA    | NA       | NA      |
| 16  | 84501918   | 84501918 | 0  | ADD  | 7304  | NA     | NA      | NA     | NA    | NA       | NA      |
| 16  | rs391525   | 84501940 | G  | ADD  | 7306  | 1.082  | 0.04278 | 0.9954 | 1.177 | 1.852    | 0.06404 |
| 16  | rs366304   | 84502301 | A  | ADD  | 7251  | 0.7355 | 0.5006  | 0.2757 | 1.962 | -0.6138  | 0.5394  |
| 16  | rs2292982  | 84502324 | G  | ADD  | 7312  | 1.094  | 0.04292 | 1.006  | 1.19  | 2.094    | 0.03628 |
| 16  | 84502367   | 84502367 | 0  | ADD  | 7267  | NA     | NA      | NA     | NA    | NA       | NA      |
| 16  | rs2292980  | 84502577 | C  | ADD  | 7311  | 1.096  | 0.04292 | 1.008  | 1.192 | 2.14     | 0.03234 |
| 16  | 84502640   | 84502640 | A  | ADD  | 7316  | 1.787  | 0.7905  | 0.3797 | 8.415 | 0.7347   | 0.4625  |
| 16  | rs8052064  | 84502732 | T  | ADD  | 7122  | 1.081  | 0.1153  | 0.8621 | 1.355 | 0.6731   | 0.5009  |
| 16  | rs16939945 | 84502750 | T  | ADD  | 7279  | 0.8275 | 0.1077  | 0.67   | 1.022 | -1.757   | 0.07888 |
| 16  | 84502870   | 84502870 | T  | ADD  | 7316  | 0.2854 | 1.24    | 0.0251 | 3.245 | -1.011   | 0.3121  |
| 16  | 84502888   | 84502888 | C  | ADD  | 7316  | 0.2854 | 1.24    | 0.0251 | 3.245 | -1.011   | 0.3121  |
| 16  | rs1519976  | 84503176 | G  | ADD  | 7296  | 1.044  | 0.03872 | 0.9677 | 1.126 | 1.112    | 0.2662  |
| 16  | rs768410   | 84503229 | G  | ADD  | 7301  | 1.044  | 0.03872 | 0.9678 | 1.126 | 1.115    | 0.2649  |
| 16  | rs147968   | 84503340 | C  | ADD  | 7288  | 1.042  | 0.03874 | 0.966  | 1.124 | 1.068    | 0.2857  |
| 16  | 84503481   | 84503481 | 0  | ADD  | 7315  | NA     | NA      | NA     | NA    | NA       | NA      |
| 16  | 84503489   | 84503489 | 0  | ADD  | 7260  | NA     | NA      | NA     | NA    | NA       | NA      |
| 16  | rs925994   | 84503518 | A  | ADD  | 7292  | 1.18   | 0.09598 | 0.9777 | 1.424 | 1.725    | 0.08455 |
| 16  | rs12923978 | 84503825 | C  | ADD  | 7201  | 1.073  | 0.04605 | 0.98   | 1.174 | 1.52     | 0.1285  |
| 16  | rs424971   | 84503951 | C  | ADD  | 7252  | 1.038  | 0.03894 | 0.9615 | 1.12  | 0.9506   | 0.3418  |
| 16  | rs11649318 | 84503982 | C  | ADD  | 7302  | 1.05   | 0.04067 | 0.9696 | 1.137 | 1.202    | 0.2294  |
| 16  | rs11863590 | 84503995 | G  | ADD  | 7207  | 1.075  | 0.04602 | 0.9824 | 1.177 | 1.573    | 0.1157  |
| 16  | 84504494   | 84504494 | 0  | ADD  | 7297  | NA     | NA      | NA     | NA    | NA       | NA      |
| 16  | 84504502   | 84504502 | 0  | ADD  | 7310  | NA     | NA      | NA     | NA    | NA       | NA      |
| 16  | 84504605   | 84504605 | C  | ADD  | 6962  | 0.9253 | 0.06029 | 0.8222 | 1.041 | -1.287   | 0.198   |
| 16  | 84504608   | 84504608 | T  | ADD  | 7309  | 1.003  | 0.6361  | 0.2883 | 3.489 | 0.004509 | 0.9964  |
| 16  | 84504790   | 84504790 | 0  | ADD  | 7318  | NA     | NA      | NA     | NA    | NA       | NA      |
| 16  | rs8051462  | 84504828 | G  | ADD  | 7290  | 1.039  | 0.03836 | 0.9636 | 1.12  | 0.9934   | 0.3205  |
| 16  | rs8064111  | 84504976 | T  | ADD  | 7199  | 1.133  | 0.118   | 0.8989 | 1.428 | 1.057    | 0.2906  |
| 16  | rs8047999  | 84505028 | C  | ADD  | 7302  | 1.032  | 0.03836 | 0.9574 | 1.113 | 0.8261   | 0.4087  |

| CHR | SNP        | BP       | A1 | TEST | NMISS | OR     | SE      | L95     | U95   | STAT     | P       |
|-----|------------|----------|----|------|-------|--------|---------|---------|-------|----------|---------|
| 16  | 84505065   | 84505065 | C  | ADD  | 7293  | 0.4249 | 1.306   | 0.03288 | 5.491 | -0.6556  | 0.5121  |
| 16  | 84505099   | 84505099 | O  | ADD  | 7318  | NA     | NA      | NA      | NA    | NA       | NA      |
| 16  | 84505252   | 84505252 | A  | ADD  | 7169  | 1.174  | 0.1869  | 0.8142  | 1.694 | 0.8601   | 0.3897  |
| 16  | rs903202   | 84505280 | C  | ADD  | 7206  | 1.027  | 0.03829 | 0.9525  | 1.107 | 0.6878   | 0.4916  |
| 16  | rs13331970 | 84505479 | A  | ADD  | 7289  | 0.9904 | 0.377   | 0.4731  | 2.073 | -0.02556 | 0.9796  |
| 16  | rs17444416 | 84505599 | A  | ADD  | 7307  | 0.9673 | 0.07477 | 0.8355  | 1.12  | -0.444   | 0.657   |
| 16  | 84505753   | 84505753 | G  | ADD  | 7303  | 1.005  | 0.636   | 0.289   | 3.496 | 0.008133 | 0.9935  |
| 16  | rs11649271 | 84505830 | C  | ADD  | 7265  | 1.114  | 0.1252  | 0.8717  | 1.424 | 0.8633   | 0.388   |
| 16  | 84505980   | 84505980 | O  | ADD  | 7316  | NA     | NA      | NA      | NA    | NA       | NA      |
| 16  | rs903203   | 84506142 | A  | ADD  | 6950  | 1.022  | 0.04079 | 0.9434  | 1.107 | 0.5305   | 0.5958  |
| 16  | 84506417   | 84506417 | T  | ADD  | 7309  | 1.003  | 0.6361  | 0.2883  | 3.489 | 0.004509 | 0.9964  |
| 16  | rs403038   | 84506572 | A  | ADD  | 7311  | 1.095  | 0.1198  | 0.866   | 1.385 | 0.7591   | 0.4478  |
| 16  | rs8054513  | 84506608 | G  | ADD  | 7299  | 1.121  | 0.1246  | 0.8778  | 1.431 | 0.9142   | 0.3606  |
| 16  | rs8059127  | 84506690 | A  | ADD  | 7299  | 1.033  | 0.3371  | 0.5333  | 1.999 | 0.095    | 0.9243  |
| 16  | rs62052557 | 84506707 | A  | ADD  | 6847  | 0.7269 | 0.4389  | 0.3076  | 1.718 | -0.7266  | 0.4675  |
| 16  | rs305071   | 84506772 | A  | ADD  | 7027  | 0.9631 | 0.08914 | 0.8087  | 1.147 | -0.4216  | 0.6733  |
| 16  | rs28552575 | 84506805 | T  | ADD  | 7300  | 0.7912 | 0.4063  | 0.3568  | 1.754 | -0.5765  | 0.5643  |
| 16  | 84506880   | 84506880 | C  | ADD  | 7268  | 1.085  | 0.2454  | 0.671   | 1.756 | 0.3342   | 0.7382  |
| 16  | rs305070   | 84506925 | G  | ADD  | 7306  | 1.069  | 0.105   | 0.8701  | 1.313 | 0.6345   | 0.5257  |
| 16  | rs9928776  | 84506960 | T  | ADD  | 7300  | 0.8986 | 0.4009  | 0.4096  | 1.971 | -0.2668  | 0.7896  |
| 16  | rs16939967 | 84506974 | T  | ADD  | 7310  | 1.04   | 0.04767 | 0.9468  | 1.141 | 0.8137   | 0.4158  |
| 16  | rs305069   | 84507059 | C  | ADD  | 7162  | 1.03   | 0.03852 | 0.9553  | 1.111 | 0.7735   | 0.4392  |
| 16  | rs35819447 | 84507211 | G  | ADD  | 7015  | 1.359  | 1.074   | 0.1656  | 11.16 | 0.2859   | 0.7749  |
| 16  | 84507230   | 84507230 | O  | ADD  | 7318  | NA     | NA      | NA      | NA    | NA       | NA      |
| 16  | rs305068   | 84507397 | G  | ADD  | 7270  | 1.108  | 0.1255  | 0.8664  | 1.417 | 0.8179   | 0.4134  |
| 16  | rs16939969 | 84507645 | C  | ADD  | 7305  | 0.872  | 0.3185  | 0.4671  | 1.628 | -0.4299  | 0.6673  |
| 16  | rs28631400 | 84507948 | T  | ADD  | 7306  | 0.6953 | 0.3762  | 0.3326  | 1.453 | -0.9662  | 0.334   |
| 16  | rs28407896 | 84507957 | T  | ADD  | 7306  | 0.6953 | 0.3762  | 0.3326  | 1.453 | -0.9662  | 0.334   |
| 16  | 84508024   | 84508024 | O  | ADD  | 7318  | NA     | NA      | NA      | NA    | NA       | NA      |
| 16  | rs11117415 | 84508187 | G  | ADD  | 7304  | 1.157  | 0.07758 | 0.9937  | 1.347 | 1.879    | 0.06026 |
| 16  | 84508204   | 84508204 | O  | ADD  | 7316  | NA     | NA      | NA      | NA    | NA       | NA      |
| 16  | rs4843860  | 84508422 | G  | ADD  | 7284  | 0.9808 | 0.04035 | 0.9063  | 1.062 | -0.4796  | 0.6315  |
| 16  | rs4843861  | 84508477 | T  | ADD  | 7309  | 0.9787 | 0.04027 | 0.9044  | 1.059 | -0.5348  | 0.5928  |
| 16  | rs9926067  | 84508696 | G  | ADD  | 7309  | 0.7751 | 0.3339  | 0.4028  | 1.491 | -0.7628  | 0.4456  |
| 16  | rs12926854 | 84508759 | G  | ADD  | 7276  | 0.9775 | 0.04035 | 0.9032  | 1.058 | -0.5633  | 0.5732  |
| 16  | rs8054065  | 84508855 | A  | ADD  | 7230  | 0.9855 | 0.04002 | 0.9111  | 1.066 | -0.3654  | 0.7148  |
| 16  | 84508893   | 84508893 | O  | ADD  | 7182  | NA     | NA      | NA      | NA    | NA       | NA      |
| 16  | rs8046526  | 84509136 | T  | ADD  | 7318  | NA     | NA      | NA      | NA    | NA       | NA      |
| 16  | rs9934699  | 84509137 | A  | ADD  | 7268  | 1.147  | 0.06882 | 1.002   | 1.313 | 1.993    | 0.04626 |
| 16  | rs9934701  | 84509148 | A  | ADD  | 7268  | 1.147  | 0.06882 | 1.002   | 1.313 | 1.993    | 0.04626 |
| 16  | rs9926411  | 84509158 | G  | ADD  | 7312  | 1.175  | 0.1271  | 0.9155  | 1.507 | 1.266    | 0.2056  |
| 16  | rs8058904  | 84509183 | G  | ADD  | 7295  | NA     | NA      | NA      | NA    | NA       | NA      |
| 16  | rs9924484  | 84509239 | G  | ADD  | 7273  | 1.159  | 0.06875 | 1.013   | 1.326 | 2.144    | 0.03207 |
| 16  | rs9924488  | 84509249 | G  | ADD  | 7268  | 0.9775 | 0.04029 | 0.9033  | 1.058 | -0.5638  | 0.5729  |
| 16  | rs8064189  | 84509297 | G  | ADD  | 7200  | 1.159  | 0.06839 | 1.014   | 1.325 | 2.159    | 0.03084 |
| 16  | 84509524   | 84509524 | O  | ADD  | 6604  | NA     | NA      | NA      | NA    | NA       | NA      |
| 16  | 84509646   | 84509646 | O  | ADD  | 7138  | NA     | NA      | NA      | NA    | NA       | NA      |
| 16  | rs28368114 | 84509781 | A  | ADD  | 7056  | 0.781  | 0.5704  | 0.2553  | 2.389 | -0.4335  | 0.6647  |
| 16  | rs61995933 | 84509816 | T  | ADD  | 7261  | 2.688  | 1.26    | 0.2275  | 31.77 | 0.7849   | 0.4325  |
| 16  | 84510111   | 84510111 | O  | ADD  | 7318  | NA     | NA      | NA      | NA    | NA       | NA      |
| 16  | 84510173   | 84510173 | C  | ADD  | 7165  | 0.5999 | 1.416   | 0.03741 | 9.621 | -0.3609  | 0.7182  |
| 16  | rs2280378  | 84510246 | G  | ADD  | 7277  | 1.038  | 0.03895 | 0.9613  | 1.12  | 0.9465   | 0.3439  |

| CHR | SNP        | BP       | A1 | TEST | NMISS | OR       | SE       | L95     | U95   | STAT       | P       |
|-----|------------|----------|----|------|-------|----------|----------|---------|-------|------------|---------|
| 16  | rs7185022  | 84510430 | A  | ADD  | 7251  | 0.9651   | 0.03901  | 0.8941  | 1.042 | -0.9105    | 0.3626  |
| 16  | rs13338943 | 84510452 | T  | ADD  | 7317  | 0.9248   | 0.05476  | 0.8307  | 1.03  | -1.427     | 0.1535  |
| 16  | rs12929551 | 84510511 | T  | ADD  | 7305  | 1.023    | 0.04752  | 0.9317  | 1.123 | 0.4722     | 0.6368  |
| 16  | 84510613   | 84510613 | T  | ADD  | 7298  | 4.664    | 0.8166   | 0.9414  | 23.11 | 1.886      | 0.0593  |
| 16  | rs16939994 | 84510669 | G  | ADD  | 7298  | 1.144    | 0.132    | 0.8832  | 1.482 | 1.019      | 0.3081  |
| 16  | rs8057456  | 84510697 | T  | ADD  | 7106  | 1.088    | 0.04303  | 1       | 1.184 | 1.969      | 0.049   |
| 16  | 84510714   | 84510714 | C  | ADD  | 7258  | 2.32E-09 | 2.44E+04 | 0       | inf   | -0.0008156 | 0.9993  |
| 16  | 84510896   | 84510896 | A  | ADD  | 6968  | 0.9474   | 0.1339   | 0.7288  | 1.232 | -0.4034    | 0.6867  |
| 16  | 84510938   | 84510938 | O  | ADD  | 7288  | NA       | NA       | NA      | NA    | NA         | NA      |
| 16  | rs9927932  | 84510947 | T  | ADD  | 7317  | 1.436    | 0.3699   | 0.6953  | 2.965 | 0.9777     | 0.3282  |
| 16  | rs11866752 | 84510994 | T  | ADD  | 7308  | 2.253    | 0.5156   | 0.8203  | 6.19  | 1.576      | 0.1151  |
| 16  | rs28368115 | 84511122 | T  | ADD  | 7286  | 1.105    | 0.1357   | 0.8471  | 1.442 | 0.7369     | 0.4612  |
| 16  | rs16940005 | 84511183 | C  | ADD  | 7259  | 1.042    | 0.04787  | 0.9485  | 1.144 | 0.8551     | 0.3925  |
| 16  | 84511331   | 84511331 | O  | ADD  | 7318  | NA       | NA       | NA      | NA    | NA         | NA      |
| 16  | rs35593615 | 84511410 | G  | ADD  | 7287  | 1.033    | 0.04759  | 0.9411  | 1.134 | 0.6848     | 0.4935  |
| 16  | rs3751712  | 84511456 | C  | ADD  | 6654  | 1.06     | 0.04595  | 0.9684  | 1.16  | 1.261      | 0.2074  |
| 16  | 84511483   | 84511483 | A  | ADD  | 5803  | 0.9581   | 0.227    | 0.6141  | 1.495 | -0.1884    | 0.8506  |
| 16  | rs4843321  | 84511577 | C  | ADD  | 7135  | 1.075    | 0.04506  | 0.9837  | 1.174 | 1.596      | 0.1105  |
| 16  | 84511720   | 84511720 | G  | ADD  | 7314  | 8.667    | 1.115    | 0.9737  | 77.16 | 1.936      | 0.05286 |
| 16  | rs16940007 | 84511788 | T  | ADD  | 7313  | 3.50E-10 | 2.44E+04 | 0       | inf   | -0.0008932 | 0.9993  |
| 16  | rs16940009 | 84512089 | C  | ADD  | 7315  | 1.988    | 0.5275   | 0.7071  | 5.591 | 1.303      | 0.1926  |
| 16  | 84512224   | 84512224 | T  | ADD  | 7316  | 1.32E+09 | 2.44E+04 | 0       | inf   | 0.0008613  | 0.9993  |
| 16  | rs2270503  | 84512302 | A  | ADD  | 7309  | 0.2876   | 1.24     | 0.02531 | 3.268 | -1.005     | 0.3149  |
| 16  | 84512462   | 84512462 | O  | ADD  | 7311  | NA       | NA       | NA      | NA    | NA         | NA      |
| 16  | 84512553   | 84512553 | O  | ADD  | 7316  | NA       | NA       | NA      | NA    | NA         | NA      |
| 16  | 84512648   | 84512648 | A  | ADD  | 7312  | 3.181    | 1.374    | 0.2152  | 47.01 | 0.842      | 0.3998  |
| 16  | rs28368116 | 84512695 | C  | ADD  | 7261  | 0.7057   | 0.2657   | 0.4192  | 1.188 | -1.312     | 0.1896  |
| 16  | rs10514611 | 84512743 | T  | ADD  | 7261  | 1.147    | 0.07722  | 0.9859  | 1.334 | 1.776      | 0.07566 |
| 16  | rs1568391  | 84512805 | G  | ADD  | 7027  | 0.969    | 0.04022  | 0.8955  | 1.048 | -0.7832    | 0.4335  |
| 16  | rs305072   | 84513164 | G  | ADD  | 7302  | 1.059    | 0.1276   | 0.825   | 1.36  | 0.4524     | 0.651   |
| 16  | rs1044873  | 84513172 | A  | ADD  | 7177  | 1.077    | 0.04471  | 0.9868  | 1.176 | 1.663      | 0.09633 |
| 16  | 84513230   | 84513230 | A  | ADD  | 6983  | 0.9669   | 0.0406   | 0.893   | 1.047 | -0.8278    | 0.4078  |
| 16  | 84513410   | 84513410 | G  | ADD  | 7308  | 0.2875   | 1.24     | 0.0253  | 3.267 | -1.005     | 0.3148  |
| 16  | rs28368119 | 84513449 | T  | ADD  | 7054  | 0.713    | 0.2203   | 0.463   | 1.098 | -1.536     | 0.1246  |
| 16  | 84513495   | 84513495 | O  | ADD  | 7318  | NA       | NA       | NA      | NA    | NA         | NA      |
| 16  | rs6638     | 84513545 | A  | ADD  | 6980  | 0.9754   | 0.04056  | 0.9009  | 1.056 | -0.6142    | 0.5391  |
| 16  | 84513863   | 84513863 | C  | ADD  | 2097  | 1.053    | 0.07329  | 0.9117  | 1.215 | 0.6992     | 0.4844  |
| 16  | rs11646027 | 84513898 | C  | ADD  | 7290  | 1.145    | 0.07454  | 0.9893  | 1.325 | 1.816      | 0.06944 |
| 16  | rs28368120 | 84514144 | T  | ADD  | 7304  | 1.119    | 0.129    | 0.8688  | 1.441 | 0.8699     | 0.3844  |
| 16  | 84514396   | 84514396 | C  | ADD  | 6915  | 1.316    | 0.2049   | 0.8804  | 1.966 | 1.338      | 0.1808  |
| 16  | rs7204286  | 84514422 | T  | ADD  | 7172  | 1.141    | 0.0744   | 0.9865  | 1.321 | 1.777      | 0.07553 |
| 16  | rs1021479  | 84514915 | C  | ADD  | 7301  | 1.131    | 0.1266   | 0.8826  | 1.45  | 0.9737     | 0.3302  |
| 16  | 84514923   | 84514923 | O  | ADD  | 7309  | NA       | NA       | NA      | NA    | NA         | NA      |
| 16  | rs305073   | 84515294 | T  | ADD  | 7207  | 1.095    | 0.0432   | 1.006   | 1.191 | 2.094      | 0.03622 |
| 16  | rs305074   | 84515321 | C  | ADD  | 7211  | 1.099    | 0.04299  | 1.01    | 1.195 | 2.19       | 0.02849 |
| 16  | rs9932835  | 84515425 | G  | ADD  | 7284  | 1.155    | 0.07447  | 0.998   | 1.336 | 1.933      | 0.05326 |
| 16  | rs11117416 | 84515825 | G  | ADD  | 7316  | 1.146    | 0.07372  | 0.9915  | 1.324 | 1.844      | 0.06518 |
| 16  | 84516049   | 84516049 | O  | ADD  | 7209  | NA       | NA       | NA      | NA    | NA         | NA      |
| 16  | 84516201   | 84516201 | T  | ADD  | 7317  | 2.06E-09 | 2.44E+04 | 0       | inf   | -0.0008204 | 0.9993  |
| 16  | rs16940023 | 84516215 | T  | ADD  | 7302  | 1.128    | 0.126    | 0.8809  | 1.444 | 0.9542     | 0.34    |
| 16  | rs8052521  | 84516230 | A  | ADD  | 7306  | 1.14     | 0.06514  | 1.003   | 1.295 | 2.012      | 0.04422 |
| 16  | rs1021480  | 84516471 | G  | ADD  | 7232  | 1.181    | 0.06571  | 1.039   | 1.344 | 2.536      | 0.01121 |

| CHR | SNP        | BP       | A1 | TEST | NMISS | OR     | SE      | L95     | U95   | STAT     | P       |
|-----|------------|----------|----|------|-------|--------|---------|---------|-------|----------|---------|
| 16  | rs1021481  | 84516521 | A  | ADD  | 7304  | 1.156  | 0.06514 | 1.017   | 1.313 | 2.225    | 0.02606 |
| 16  | rs880364   | 84516666 | G  | ADD  | 7311  | 1.157  | 0.06493 | 1.019   | 1.314 | 2.247    | 0.02464 |
| 16  | rs880365   | 84516863 | T  | ADD  | 7314  | 1.141  | 0.06469 | 1.005   | 1.295 | 2.039    | 0.04148 |
| 16  | rs880366   | 84516939 | C  | ADD  | 7313  | 1.151  | 0.06461 | 1.014   | 1.306 | 2.175    | 0.02966 |
| 16  | 84517038   | 84517038 | O  | ADD  | 7296  | NA     | NA      | NA      | NA    | NA       | NA      |
| 16  | 84517061   | 84517061 | O  | ADD  | 7291  | NA     | NA      | NA      | NA    | NA       | NA      |
| 16  | 84517099   | 84517099 | O  | ADD  | 7318  | NA     | NA      | NA      | NA    | NA       | NA      |
| 16  | rs305075   | 84517136 | T  | ADD  | 7304  | 0.9774 | 0.0395  | 0.9046  | 1.056 | -0.5791  | 0.5625  |
| 16  | 84517710   | 84517710 | O  | ADD  | 7314  | NA     | NA      | NA      | NA    | NA       | NA      |
| 16  | rs11644411 | 84517732 | C  | ADD  | 7240  | 1.167  | 0.07365 | 1.01    | 1.348 | 2.095    | 0.03617 |
| 16  | rs11648480 | 84517780 | T  | ADD  | 7257  | 1.173  | 0.07388 | 1.014   | 1.355 | 2.154    | 0.03121 |
| 16  | 84517870   | 84517870 | A  | ADD  | 7116  | 1.181  | 0.1331  | 0.9097  | 1.533 | 1.249    | 0.2117  |
| 16  | 84517901   | 84517901 | C  | ADD  | 7304  | 0.5483 | 0.5693  | 0.1796  | 1.673 | -1.056   | 0.2912  |
| 16  | rs1472235  | 84518468 | A  | ADD  | 7162  | 1.013  | 0.04624 | 0.9252  | 1.109 | 0.2778   | 0.7812  |
| 16  | 84518535   | 84518535 | T  | ADD  | 6865  | 0.6558 | 0.5101  | 0.2413  | 1.782 | -0.827   | 0.4082  |
| 16  | rs1038953  | 84518591 | A  | ADD  | 6777  | 1.381  | 0.2595  | 0.8303  | 2.296 | 1.243    | 0.2138  |
| 16  | 84518682   | 84518682 | A  | ADD  | 7243  | 1.482  | 0.505   | 0.5507  | 3.987 | 0.7785   | 0.4363  |
| 16  | 84518866   | 84518866 | C  | ADD  | 7243  | 1.361  | 0.971   | 0.2029  | 9.125 | 0.3171   | 0.7512  |
| 16  | rs4843862  | 84518960 | G  | ADD  | 5522  | 0.9699 | 0.04395 | 0.8899  | 1.057 | -0.6949  | 0.4871  |
| 16  | rs17444745 | 84519063 | A  | ADD  | 7313  | 0.9445 | 0.04804 | 0.8596  | 1.038 | -1.189   | 0.2344  |
| 16  | 84519295   | 84519295 | T  | ADD  | 7316  | 8.675  | 1.115   | 0.9746  | 77.23 | 1.937    | 0.05276 |
| 16  | 84519403   | 84519403 | G  | ADD  | 7242  | 1.121  | 0.3274  | 0.5901  | 2.13  | 0.3491   | 0.727   |
| 16  | 84519498   | 84519498 | G  | ADD  | 7308  | 0.5065 | 0.8936  | 0.08789 | 2.919 | -0.7612  | 0.4465  |
| 16  | 84519800   | 84519800 | C  | ADD  | 7298  | 2.129  | 0.8529  | 0.4001  | 11.33 | 0.8859   | 0.3757  |
| 16  | rs305076   | 84519862 | C  | ADD  | 7295  | 5.533  | 1.148   | 0.583   | 52.51 | 1.49     | 0.1362  |
| 16  | 84520081   | 84520081 | O  | ADD  | 7307  | NA     | NA      | NA      | NA    | NA       | NA      |
| 16  | 84520237   | 84520237 | C  | ADD  | 7310  | 1.529  | 1.157   | 0.1585  | 14.76 | 0.3672   | 0.7134  |
| 16  | 84520351   | 84520351 | C  | ADD  | 6539  | 1.012  | 0.09926 | 0.8331  | 1.229 | 0.1198   | 0.9047  |
| 16  | 84520516   | 84520516 | A  | ADD  | 6526  | 1.013  | 0.09831 | 0.8356  | 1.228 | 0.1329   | 0.8943  |
| 16  | 84520518   | 84520518 | O  | ADD  | 7311  | NA     | NA      | NA      | NA    | NA       | NA      |
| 16  | 84520604   | 84520604 | O  | ADD  | 7318  | NA     | NA      | NA      | NA    | NA       | NA      |
| 16  | 84521376   | 84521376 | T  | ADD  | 6983  | 1.592  | 0.292   | 0.8982  | 2.821 | 1.592    | 0.1113  |
| 16  | 84521433   | 84521433 | O  | ADD  | 7318  | NA     | NA      | NA      | NA    | NA       | NA      |
| 16  | 84521580   | 84521580 | G  | ADD  | 7292  | 4.95   | 0.8089  | 1.014   | 24.16 | 1.977    | 0.04802 |
| 16  | 84521632   | 84521632 | T  | ADD  | 7219  | 0.638  | 1.215   | 0.05902 | 6.898 | -0.37    | 0.7114  |
| 16  | 84521737   | 84521737 | O  | ADD  | 7318  | NA     | NA      | NA      | NA    | NA       | NA      |
| 16  | rs12598785 | 84521809 | G  | ADD  | 7263  | 0.9767 | 0.05367 | 0.8791  | 1.085 | -0.44    | 0.6599  |
| 16  | rs60218704 | 84521854 | C  | ADD  | 7294  | 8.725  | 1.116   | 0.9794  | 77.73 | 1.941    | 0.05223 |
| 16  | rs8045988  | 84521891 | A  | ADD  | 7315  | 1.09   | 0.07357 | 0.9435  | 1.259 | 1.17     | 0.242   |
| 16  | rs366078   | 84522064 | C  | ADD  | 7302  | 0.9645 | 0.07991 | 0.8247  | 1.128 | -0.4524  | 0.651   |
| 16  | rs2172625  | 84522286 | C  | ADD  | 7161  | 0.9283 | 0.08064 | 0.7926  | 1.087 | -0.9231  | 0.3559  |
| 16  | rs2970094  | 84522327 | A  | ADD  | 6785  | 0.9201 | 0.07489 | 0.7945  | 1.066 | -1.112   | 0.266   |
| 16  | 84522420   | 84522420 | A  | ADD  | 7250  | 0.6383 | 1.422   | 0.03934 | 10.35 | -0.3158  | 0.7521  |
| 16  | 84522462   | 84522462 | O  | ADD  | 7308  | NA     | NA      | NA      | NA    | NA       | NA      |
| 16  | rs399280   | 84522499 | G  | ADD  | 7167  | 1.022  | 0.07846 | 0.8761  | 1.192 | 0.2738   | 0.7842  |
| 16  | rs383425   | 84522540 | T  | ADD  | 7298  | 1.06   | 0.04162 | 0.9766  | 1.15  | 1.391    | 0.1641  |
| 16  | 84522577   | 84522577 | C  | ADD  | 7293  | 0.9986 | 0.07866 | 0.8559  | 1.165 | -0.01764 | 0.9859  |
| 16  | 84522585   | 84522585 | C  | ADD  | 7057  | 1.984  | 0.3701  | 0.9604  | 4.097 | 1.851    | 0.0642  |
| 16  | rs56200928 | 84522852 | C  | ADD  | 7007  | 1.461  | 0.191   | 1.005   | 2.125 | 1.985    | 0.04711 |
| 16  | 84522867   | 84522867 | O  | ADD  | 7318  | NA     | NA      | NA      | NA    | NA       | NA      |
| 16  | 84522980   | 84522980 | A  | ADD  | 7305  | 1.263  | 1.557   | 0.05976 | 26.7  | 0.1501   | 0.8807  |
| 16  | rs523642   | 84523096 | A  | ADD  | 7280  | 1.009  | 0.07949 | 0.8634  | 1.179 | 0.1129   | 0.9101  |

| CHR | SNP        | BP       | A1 | TEST | NMISS | OR       | SE       | L95    | U95   | STAT     | P       |
|-----|------------|----------|----|------|-------|----------|----------|--------|-------|----------|---------|
| 16  | rs524432   | 84523155 | C  | ADD  | 7315  | 1.007    | 0.07806  | 0.8641 | 1.173 | 0.08861  | 0.9294  |
| 16  | 84523165   | 84523165 | A  | ADD  | 7308  | 0.7084   | 0.2877   | 0.4031 | 1.245 | -1.198   | 0.2308  |
| 16  | 84523216   | 84523216 | T  | ADD  | 7303  | 5.24E+09 | 2.44E+04 | 0      | inf   | 0.000918 | 0.9993  |
| 16  | rs388988   | 84523302 | T  | ADD  | 7257  | 0.988    | 0.07782  | 0.8482 | 1.151 | -0.1555  | 0.8765  |
| 16  | 84523320   | 84523320 | O  | ADD  | 7311  | NA       | NA       | NA     | NA    | NA       | NA      |
| 16  | rs73266819 | 84523372 | C  | ADD  | 7314  | 0.8448   | 0.7958   | 0.1776 | 4.019 | -0.212   | 0.8321  |
| 16  | 84523433   | 84523433 | C  | ADD  | 7063  | 0.9422   | 0.0849   | 0.7977 | 1.113 | -0.7016  | 0.4829  |
| 16  | rs411221   | 84523460 | C  | ADD  | 7146  | 0.9769   | 0.08     | 0.8351 | 1.143 | -0.292   | 0.7703  |
| 16  | 84523472   | 84523472 | O  | ADD  | 7318  | NA       | NA       | NA     | NA    | NA       | NA      |
| 16  | 84523510   | 84523510 | O  | ADD  | 7309  | NA       | NA       | NA     | NA    | NA       | NA      |
| 16  | rs878453   | 84523664 | C  | ADD  | 7050  | 0.967    | 0.04138  | 0.8917 | 1.049 | -0.8112  | 0.4172  |
| 16  | rs878454   | 84523673 | A  | ADD  | 7281  | 0.9581   | 0.05751  | 0.8559 | 1.072 | -0.745   | 0.4563  |
| 16  | rs903201   | 84523785 | C  | ADD  | 7231  | 0.9826   | 0.05648  | 0.8796 | 1.098 | -0.311   | 0.7558  |
| 16  | rs11861479 | 84523794 | G  | ADD  | 7233  | 0.9823   | 0.05648  | 0.8794 | 1.097 | -0.3156  | 0.7523  |
| 16  | rs11117417 | 84523830 | T  | ADD  | 7234  | 0.9867   | 0.05651  | 0.8832 | 1.102 | -0.2376  | 0.8122  |
| 16  | rs58980382 | 84523934 | T  | ADD  | 7048  | 0.8994   | 0.08797  | 0.757  | 1.069 | -1.205   | 0.2281  |
| 16  | rs11860480 | 84523959 | C  | ADD  | 7301  | 0.968    | 0.04523  | 0.8859 | 1.058 | -0.7188  | 0.4723  |
| 16  | rs11860517 | 84524000 | G  | ADD  | 7297  | 0.99     | 0.05583  | 0.8874 | 1.104 | -0.1802  | 0.857   |
| 16  | rs11117418 | 84524028 | G  | ADD  | 7294  | 0.9859   | 0.05195  | 0.8904 | 1.092 | -0.2743  | 0.7839  |
| 16  | rs12051539 | 84524038 | G  | ADD  | 7195  | 1.195    | 0.1542   | 0.8836 | 1.617 | 1.157    | 0.2472  |
| 16  | 84524043   | 84524043 | A  | ADD  | 7107  | 0.9439   | 0.1276   | 0.735  | 1.212 | -0.4524  | 0.651   |
| 16  | 84524049   | 84524049 | G  | ADD  | 7172  | 0.907    | 0.08756  | 0.764  | 1.077 | -1.115   | 0.2648  |
| 16  | 84524139   | 84524139 | O  | ADD  | 7307  | NA       | NA       | NA     | NA    | NA       | NA      |
| 16  | rs13332649 | 84524184 | G  | ADD  | 7085  | 0.995    | 0.1279   | 0.7743 | 1.279 | -0.03891 | 0.969   |
| 16  | rs875529   | 84524187 | C  | ADD  | 7280  | 0.9824   | 0.05601  | 0.8803 | 1.096 | -0.317   | 0.7512  |
| 16  | rs875528   | 84524211 | A  | ADD  | 7194  | 1.263    | 0.152    | 0.9378 | 1.702 | 1.538    | 0.1241  |
| 16  | 84524220   | 84524220 | T  | ADD  | 7194  | 1.082    | 0.1905   | 0.745  | 1.572 | 0.4149   | 0.6782  |
| 16  | rs875527   | 84524231 | A  | ADD  | 7314  | 1.293    | 0.1525   | 0.9589 | 1.743 | 1.685    | 0.09207 |
| 16  | rs419030   | 84524302 | A  | ADD  | 7171  | 0.6375   | 0.2318   | 0.4047 | 1.004 | -1.942   | 0.05218 |
| 16  | 84524389   | 84524389 | O  | ADD  | 7317  | NA       | NA       | NA     | NA    | NA       | NA      |
| 16  | 84524454   | 84524454 | C  | ADD  | 6992  | 0.6062   | 0.8196   | 0.1216 | 3.022 | -0.6107  | 0.5414  |
| 16  | 84524516   | 84524516 | C  | ADD  | 7308  | 1.344    | 0.6201   | 0.3987 | 4.532 | 0.4771   | 0.6333  |
| 16  | rs12596341 | 84524541 | A  | ADD  | 7290  | 0.9325   | 0.05959  | 0.8297 | 1.048 | -1.172   | 0.2411  |
| 16  | rs7198271  | 84524586 | G  | ADD  | 7274  | 0.9558   | 0.5359   | 0.3344 | 2.732 | -0.08435 | 0.9328  |
| 16  | 84524664   | 84524664 | C  | ADD  | 6831  | 0.9232   | 0.06431  | 0.8139 | 1.047 | -1.242   | 0.2142  |
| 16  | 84524665   | 84524665 | C  | ADD  | 7165  | 0.94     | 0.05851  | 0.8381 | 1.054 | -1.058   | 0.2903  |
| 16  | 84524666   | 84524666 | C  | ADD  | 7165  | 0.94     | 0.05851  | 0.8381 | 1.054 | -1.058   | 0.2903  |
| 16  | 84524668   | 84524668 | C  | ADD  | 7133  | 0.9376   | 0.05853  | 0.836  | 1.052 | -1.1     | 0.2713  |
| 16  | 84524687   | 84524687 | C  | ADD  | 4176  | 0.8643   | 0.1425   | 0.6537 | 1.143 | -1.023   | 0.3062  |
| 16  | 84524706   | 84524706 | C  | ADD  | 3233  | 0.947    | 0.09297  | 0.7893 | 1.136 | -0.5856  | 0.5582  |
| 16  | 84524707   | 84524707 | C  | ADD  | 2823  | 0.9196   | 0.1206   | 0.726  | 1.165 | -0.6952  | 0.4869  |
| 16  | 84524722   | 84524722 | C  | ADD  | 6002  | 1.022    | 0.2219   | 0.6614 | 1.578 | 0.09683  | 0.9229  |
| 16  | 84524723   | 84524723 | C  | ADD  | 5979  | 1.024    | 0.2219   | 0.6627 | 1.581 | 0.1055   | 0.916   |
| 16  | 84524750   | 84524750 | T  | ADD  | 7049  | 0.8808   | 0.1306   | 0.6819 | 1.138 | -0.9716  | 0.3313  |
| 16  | rs12444221 | 84524786 | T  | ADD  | 7298  | 1.245    | 0.1723   | 0.888  | 1.745 | 1.27     | 0.204   |
| 16  | 84524997   | 84524997 | O  | ADD  | 7258  | NA       | NA       | NA     | NA    | NA       | NA      |
| 16  | rs437291   | 84525009 | C  | ADD  | 7281  | 0.9867   | 0.05587  | 0.8844 | 1.101 | -0.2392  | 0.8109  |
| 16  | 84525054   | 84525054 | O  | ADD  | 7315  | NA       | NA       | NA     | NA    | NA       | NA      |
| 16  | 84525087   | 84525087 | T  | ADD  | 6993  | 1.493    | 0.3471   | 0.7562 | 2.948 | 1.155    | 0.2482  |
| 16  | rs9936079  | 84525095 | A  | ADD  | 6951  | 1.179    | 0.1673   | 0.8491 | 1.636 | 0.9823   | 0.3259  |
| 16  | rs385344   | 84525105 | G  | ADD  | 7299  | NA       | NA       | NA     | NA    | NA       | NA      |
| 16  | rs447632   | 84525141 | G  | ADD  | 7301  | 0.9477   | 0.05838  | 0.8453 | 1.063 | -0.9196  | 0.3578  |

| CHR | SNP        | BP       | A1 | TEST | NMISS | OR       | SE       | L95     | U95   | STAT       | P        |
|-----|------------|----------|----|------|-------|----------|----------|---------|-------|------------|----------|
| 16  | rs34337659 | 84525158 | C  | ADD  | 7308  | NA       | NA       | NA      | NA    | NA         | NA       |
| 16  | rs66509440 | 84525182 | T  | ADD  | 6872  | NA       | NA       | NA      | NA    | NA         | NA       |
| 16  | rs66804793 | 84525190 | A  | ADD  | 6873  | NA       | NA       | NA      | NA    | NA         | NA       |
| 16  | rs9925859  | 84525223 | C  | ADD  | 7287  | 0.9934   | 0.05483  | 0.8921  | 1.106 | -0.1215    | 0.9033   |
| 16  | rs74032085 | 84525245 | C  | ADD  | 6741  | NA       | NA       | NA      | NA    | NA         | NA       |
| 16  | rs16940044 | 84525266 | G  | ADD  | 6721  | NA       | NA       | NA      | NA    | NA         | NA       |
| 16  | 84525360   | 84525360 | G  | ADD  | 7167  | 4.81E-10 | 2.44E+04 | 0       | inf   | -0.0008801 | 0.9993   |
| 16  | rs2934497  | 84525379 | T  | ADD  | 6700  | NA       | NA       | NA      | NA    | NA         | NA       |
| 16  | rs2970091  | 84525387 | A  | ADD  | 6786  | NA       | NA       | NA      | NA    | NA         | NA       |
| 16  | rs2970090  | 84525392 | A  | ADD  | 6771  | 1.007    | 0.05633  | 0.902   | 1.125 | 0.1286     | 0.8977   |
| 16  | rs56239618 | 84525421 | G  | ADD  | 6748  | 0.9055   | 0.07678  | 0.779   | 1.053 | -1.293     | 0.1961   |
| 16  | rs57439018 | 84525761 | C  | ADD  | 7311  | 0.8445   | 0.7958   | 0.1775  | 4.018 | -0.2124    | 0.8318   |
| 16  | 84525770   | 84525770 | A  | ADD  | 7313  | 1.34E+09 | 1.41E+04 | 0       | inf   | 0.001493   | 0.9988   |
| 16  | rs2934498  | 84525783 | G  | ADD  | 7306  | NA       | NA       | NA      | NA    | NA         | NA       |
| 16  | rs447919   | 84526058 | T  | ADD  | 7279  | 0.9924   | 0.05485  | 0.8913  | 1.105 | -0.1385    | 0.8898   |
| 16  | 84526080   | 84526080 | O  | ADD  | 7313  | NA       | NA       | NA      | NA    | NA         | NA       |
| 16  | 84526134   | 84526134 | O  | ADD  | 7306  | NA       | NA       | NA      | NA    | NA         | NA       |
| 16  | rs439885   | 84526175 | A  | ADD  | 7311  | NA       | NA       | NA      | NA    | NA         | NA       |
| 16  | rs10400953 | 84526344 | T  | ADD  | 7305  | 0.9875   | 0.0561   | 0.8846  | 1.102 | -0.2249    | 0.822    |
| 16  | 84526382   | 84526382 | T  | ADD  | 7309  | 6.99E-10 | 1.60E+04 | 0       | inf   | -0.001317  | 0.9989   |
| 16  | rs450443   | 84526392 | G  | ADD  | 7318  | NA       | NA       | NA      | NA    | NA         | NA       |
| 16  | rs396987   | 84526435 | G  | ADD  | 7316  | NA       | NA       | NA      | NA    | NA         | NA       |
| 16  | rs385989   | 84526509 | G  | ADD  | 7258  | 0.9846   | 0.05385  | 0.886   | 1.094 | -0.2886    | 0.7729   |
| 16  | 84526528   | 84526528 | A  | ADD  | 7245  | 0.9266   | 0.281    | 0.5342  | 1.607 | -0.2714    | 0.786    |
| 16  | rs4843865  | 84526806 | T  | ADD  | 7295  | 1.281    | 0.1685   | 0.9211  | 1.783 | 1.472      | 0.141    |
| 16  | 84527141   | 84527141 | C  | ADD  | 7306  | 1.259    | 0.1739   | 0.8951  | 1.77  | 1.322      | 0.186    |
| 16  | rs8052690  | 84527239 | G  | ADD  | 7312  | 1.298    | 0.1693   | 0.9315  | 1.809 | 1.541      | 0.1234   |
| 16  | rs7185692  | 84527553 | G  | ADD  | 7297  | 0.9857   | 0.05618  | 0.883   | 1.1   | -0.2558    | 0.7981   |
| 16  | 84527600   | 84527600 | C  | ADD  | 3039  | 1.121    | 0.0956   | 0.9294  | 1.352 | 1.194      | 0.2326   |
| 16  | 84527601   | 84527601 | A  | ADD  | 5791  | 0.9696   | 0.07776  | 0.8325  | 1.129 | -0.3968    | 0.6915   |
| 16  | 84527603   | 84527603 | C  | ADD  | 4186  | 1.026    | 0.07213  | 0.8905  | 1.182 | 0.3529     | 0.7242   |
| 16  | 84527612   | 84527612 | C  | ADD  | 7002  | 3.031    | 0.4078   | 1.363   | 6.74  | 2.719      | 0.006546 |
| 16  | 84527613   | 84527613 | T  | ADD  | 6673  | 2.031    | 0.348    | 1.027   | 4.018 | 2.037      | 0.04169  |
| 16  | 84527727   | 84527727 | O  | ADD  | 7193  | NA       | NA       | NA      | NA    | NA         | NA       |
| 16  | 84527829   | 84527829 | C  | ADD  | 7202  | 1.258    | 0.5175   | 0.4561  | 3.468 | 0.443      | 0.6578   |
| 16  | rs8059144  | 84527977 | C  | ADD  | 7279  | 1.006    | 0.05492  | 0.903   | 1.12  | 0.1015     | 0.9191   |
| 16  | rs8045825  | 84527979 | G  | ADD  | 7283  | 1.005    | 0.05492  | 0.9026  | 1.119 | 0.09478    | 0.9245   |
| 16  | 84528014   | 84528014 | G  | ADD  | 7310  | 3.49E-10 | 2.44E+04 | 0       | inf   | -0.0008932 | 0.9993   |
| 16  | 84528020   | 84528020 | T  | ADD  | 7277  | 0.5306   | 0.6327   | 0.1535  | 1.834 | -1.001     | 0.3166   |
| 16  | rs4843866  | 84528151 | T  | ADD  | 7283  | 1.005    | 0.05493  | 0.9022  | 1.119 | 0.08535    | 0.932    |
| 16  | rs4843867  | 84528219 | G  | ADD  | 7285  | 1.005    | 0.05491  | 0.9024  | 1.119 | 0.09041    | 0.928    |
| 16  | 84528233   | 84528233 | A  | ADD  | 7311  | 0.1638   | 1.093    | 0.01922 | 1.396 | -1.655     | 0.09799  |
| 16  | rs186249   | 84528397 | C  | ADD  | 7130  | 1.08     | 0.1862   | 0.7501  | 1.556 | 0.4154     | 0.6779   |
| 16  | 84528620   | 84528620 | O  | ADD  | 7318  | NA       | NA       | NA      | NA    | NA         | NA       |
| 16  | 84528669   | 84528669 | O  | ADD  | 7297  | NA       | NA       | NA      | NA    | NA         | NA       |
| 16  | rs12149636 | 84528721 | G  | ADD  | 7288  | 1.001    | 0.05599  | 0.8971  | 1.117 | 0.02002    | 0.984    |
| 16  | 84528857   | 84528857 | C  | ADD  | 7098  | 1.015    | 0.06127  | 0.9001  | 1.145 | 0.2428     | 0.8081   |
| 16  | 84528860   | 84528860 | T  | ADD  | 6296  | NA       | NA       | NA      | NA    | NA         | NA       |
| 16  | rs12149642 | 84528922 | T  | ADD  | 7021  | 0.9967   | 0.06294  | 0.881   | 1.128 | -0.05267   | 0.958    |
| 16  | 84529014   | 84529014 | G  | ADD  | 6943  | 0.807    | 0.1392   | 0.6143  | 1.06  | -1.54      | 0.1234   |
| 16  | 84529016   | 84529016 | C  | ADD  | 3179  | 0.8743   | 0.08921  | 0.7341  | 1.041 | -1.505     | 0.1322   |
| 16  | 84529025   | 84529025 | C  | ADD  | 5417  | 1.209    | 0.1146   | 0.9658  | 1.514 | 1.657      | 0.09759  |

| CHR | SNP        | BP       | A1 | TEST | NMISS | OR       | SE       | L95     | U95   | STAT      | P      |
|-----|------------|----------|----|------|-------|----------|----------|---------|-------|-----------|--------|
| 16  | 84529026   | 84529026 | C  | ADD  | 5877  | 1.073    | 0.11     | 0.8651  | 1.332 | 0.6428    | 0.5204 |
| 16  | 84529027   | 84529027 | C  | ADD  | 6463  | 0.9839   | 0.06373  | 0.8684  | 1.115 | -0.2546   | 0.799  |
| 16  | 84529028   | 84529028 | C  | ADD  | 6344  | 1.044    | 0.06343  | 0.9219  | 1.182 | 0.6784    | 0.4975 |
| 16  | 84529029   | 84529029 | C  | ADD  | 6645  | 1.02     | 0.06307  | 0.9018  | 1.155 | 0.3212    | 0.748  |
| 16  | 84529030   | 84529030 | C  | ADD  | 6645  | 1.02     | 0.06307  | 0.9018  | 1.155 | 0.3212    | 0.748  |
| 16  | 84529031   | 84529031 | C  | ADD  | 6353  | 0.9902   | 0.0634   | 0.8745  | 1.121 | -0.1558   | 0.8762 |
| 16  | rs12149223 | 84529032 | C  | ADD  | 5728  | 1.041    | 0.129    | 0.8082  | 1.34  | 0.3094    | 0.757  |
| 16  | 84529037   | 84529037 | C  | ADD  | 6893  | 0.9738   | 0.2279   | 0.623   | 1.522 | -0.1165   | 0.9073 |
| 16  | 84529038   | 84529038 | C  | ADD  | 6955  | 1.425    | 0.3655   | 0.696   | 2.916 | 0.9686    | 0.3328 |
| 16  | 84529220   | 84529220 | T  | ADD  | 7005  | 1.039    | 0.1478   | 0.7777  | 1.388 | 0.2585    | 0.7961 |
| 16  | 84529277   | 84529277 | O  | ADD  | 7318  | NA       | NA       | NA      | NA    | NA        | NA     |
| 16  | rs305067   | 84529341 | C  | ADD  | 6680  | 0.9836   | 0.05375  | 0.8852  | 1.093 | -0.3077   | 0.7583 |
| 16  | rs11117419 | 84529383 | G  | ADD  | 7291  | 1.005    | 0.06128  | 0.8908  | 1.133 | 0.07383   | 0.9411 |
| 16  | rs11117420 | 84529423 | C  | ADD  | 7061  | 1.355    | 0.3077   | 0.7413  | 2.476 | 0.9872    | 0.3235 |
| 16  | rs11117421 | 84529461 | A  | ADD  | 7293  | 1.003    | 0.06127  | 0.8895  | 1.131 | 0.04868   | 0.9612 |
| 16  | rs11117422 | 84529514 | C  | ADD  | 7202  | NA       | NA       | NA      | NA    | NA        | NA     |
| 16  | 84529575   | 84529575 | O  | ADD  | 7243  | NA       | NA       | NA      | NA    | NA        | NA     |
| 16  | rs11117423 | 84529682 | C  | ADD  | 7265  | 1.006    | 0.06132  | 0.8922  | 1.135 | 0.0999    | 0.9204 |
| 16  | rs11117424 | 84529738 | G  | ADD  | 7311  | 1.005    | 0.06119  | 0.8912  | 1.133 | 0.07694   | 0.9387 |
| 16  | rs11117425 | 84529772 | T  | ADD  | 7303  | 1.006    | 0.0613   | 0.8924  | 1.135 | 0.1037    | 0.9174 |
| 16  | rs11648012 | 84529908 | T  | ADD  | 7309  | 1.004    | 0.06116  | 0.8907  | 1.132 | 0.06797   | 0.9458 |
| 16  | 84530040   | 84530040 | T  | ADD  | 7304  | 0.8628   | 1.42     | 0.05333 | 13.96 | -0.1039   | 0.9172 |
| 16  | rs11643999 | 84530070 | A  | ADD  | 7310  | 1.004    | 0.06116  | 0.8908  | 1.132 | 0.06956   | 0.9445 |
| 16  | rs11648084 | 84530099 | T  | ADD  | 7313  | 1.007    | 0.0612   | 0.8935  | 1.136 | 0.1192    | 0.9051 |
| 16  | rs11644034 | 84530113 | A  | ADD  | 7264  | NA       | NA       | NA      | NA    | NA        | NA     |
| 16  | rs16940083 | 84530130 | T  | ADD  | 7313  | 0.6592   | 0.7663   | 0.1468  | 2.96  | -0.5438   | 0.5866 |
| 16  | 84530187   | 84530187 | O  | ADD  | 7157  | NA       | NA       | NA      | NA    | NA        | NA     |
| 16  | rs305066   | 84530277 | T  | ADD  | 7255  | 1.08     | 0.09837  | 0.8909  | 1.31  | 0.7856    | 0.4321 |
| 16  | rs12600127 | 84530280 | G  | ADD  | 7273  | 0.9948   | 0.06139  | 0.882   | 1.122 | -0.08468  | 0.9325 |
| 16  | rs13335265 | 84530311 | C  | ADD  | 6914  | 0.8683   | 0.2176   | 0.5668  | 1.33  | -0.6487   | 0.5165 |
| 16  | 84530325   | 84530325 | O  | ADD  | 7259  | NA       | NA       | NA      | NA    | NA        | NA     |
| 16  | 84530431   | 84530431 | G  | ADD  | 7309  | 6.99E-10 | 1.60E+04 | 0       | inf   | -0.001317 | 0.9989 |
| 16  | rs62051023 | 84530439 | T  | ADD  | 7286  | 1.289    | 0.1686   | 0.9259  | 1.793 | 1.504     | 0.1327 |
| 16  | 84530468   | 84530468 | T  | ADD  | 7278  | 0.5326   | 1.32     | 0.04007 | 7.078 | -0.4773   | 0.6332 |
| 16  | rs8062669  | 84530493 | T  | ADD  | 7304  | 1.004    | 0.09069  | 0.8403  | 1.199 | 0.04187   | 0.9666 |
| 16  | rs12711490 | 84530529 | C  | ADD  | 7309  | NA       | NA       | NA      | NA    | NA        | NA     |
| 16  | 84530554   | 84530554 | C  | ADD  | 7310  | 2.068    | 0.7432   | 0.4817  | 8.874 | 0.9773    | 0.3284 |
| 16  | rs12598434 | 84530560 | T  | ADD  | 7264  | 1.007    | 0.06132  | 0.8933  | 1.136 | 0.1209    | 0.9038 |
| 16  | rs11641153 | 84530641 | G  | ADD  | 7293  | NA       | NA       | NA      | NA    | NA        | NA     |
| 16  | rs11641155 | 84530653 | G  | ADD  | 7292  | NA       | NA       | NA      | NA    | NA        | NA     |
| 16  | rs7205434  | 84530696 | G  | ADD  | 7292  | NA       | NA       | NA      | NA    | NA        | NA     |
| 16  | rs8050476  | 84530705 | G  | ADD  | 7316  | 0.9675   | 0.08862  | 0.8133  | 1.151 | -0.3725   | 0.7096 |
| 16  | rs4843868  | 84530902 | T  | ADD  | 7288  | NA       | NA       | NA      | NA    | NA        | NA     |
| 16  | 84530967   | 84530967 | T  | ADD  | 7294  | 0.9694   | 0.1085   | 0.7836  | 1.199 | -0.2867   | 0.7743 |
| 16  | rs1879213  | 84530977 | T  | ADD  | 7302  | 0.9835   | 0.06156  | 0.8717  | 1.11  | -0.2701   | 0.7871 |
| 16  | rs56250418 | 84530999 | T  | ADD  | 7048  | 0.9102   | 0.07328  | 0.7884  | 1.051 | -1.284    | 0.1991 |
| 16  | rs305065   | 84531367 | G  | ADD  | 7270  | 0.9968   | 0.05143  | 0.9012  | 1.103 | -0.06187  | 0.9507 |
| 16  | 84531390   | 84531390 | C  | ADD  | 7220  | 0.9589   | 0.2715   | 0.5632  | 1.633 | -0.1544   | 0.8773 |
| 16  | rs305064   | 84531643 | T  | ADD  | 7255  | 1.004    | 0.05144  | 0.9076  | 1.11  | 0.07442   | 0.9407 |
| 16  | rs9927123  | 84531682 | G  | ADD  | 7279  | 0.9913   | 0.05315  | 0.8932  | 1.1   | -0.1642   | 0.8696 |
| 16  | rs16940087 | 84531752 | T  | ADD  | 7313  | 0.6592   | 0.7663   | 0.1468  | 2.96  | -0.5438   | 0.5866 |
| 16  | rs16940088 | 84531870 | T  | ADD  | 7300  | 0.9861   | 0.06161  | 0.8739  | 1.113 | -0.2272   | 0.8203 |



| CHR | SNP        | BP       | A1 | TEST | NMISS | OR     | SE      | L95     | U95   | STAT     | P       |
|-----|------------|----------|----|------|-------|--------|---------|---------|-------|----------|---------|
| 16  | rs13330932 | 84532008 | T  | ADD  | 7226  | 0.9428 | 0.06564 | 0.829   | 1.072 | -0.8972  | 0.3696  |
| 16  | 84532040   | 84532040 | T  | ADD  | 7279  | 0.5322 | 1.32    | 0.04004 | 7.073 | -0.4779  | 0.6327  |
| 16  | rs305063   | 84532158 | T  | ADD  | 6981  | 0.9658 | 0.08939 | 0.8106  | 1.151 | -0.3897  | 0.6967  |
| 16  | 84532198   | 84532198 | O  | ADD  | 7302  | NA     | NA      | NA      | NA    | NA       | NA      |
| 16  | rs56834409 | 84532277 | G  | ADD  | 7300  | 0.9873 | 0.06161 | 0.875   | 1.114 | -0.2066  | 0.8363  |
| 16  | 84532342   | 84532342 | C  | ADD  | 4958  | 0.9463 | 0.08392 | 0.8028  | 1.115 | -0.6575  | 0.5108  |
| 16  | rs4843322  | 84532386 | G  | ADD  | 7299  | 0.9862 | 0.06155 | 0.8742  | 1.113 | -0.2253  | 0.8217  |
| 16  | rs4843323  | 84532462 | T  | ADD  | 7305  | NA     | NA      | NA      | NA    | NA       | NA      |
| 16  | rs12596291 | 84532538 | C  | ADD  | 7297  | 0.9862 | 0.06163 | 0.874   | 1.113 | -0.225   | 0.822   |
| 16  | rs12596295 | 84532576 | A  | ADD  | 7291  | 0.931  | 0.0656  | 0.8186  | 1.059 | -1.09    | 0.2756  |
| 16  | rs4843869  | 84532642 | A  | ADD  | 7318  | NA     | NA      | NA      | NA    | NA       | NA      |
| 16  | 84532733   | 84532733 | O  | ADD  | 7157  | NA     | NA      | NA      | NA    | NA       | NA      |
| 16  | 84532800   | 84532800 | G  | ADD  | 7035  | 1.444  | 0.457   | 0.5896  | 3.536 | 0.8038   | 0.4215  |
| 16  | 84532862   | 84532862 | O  | ADD  | 7021  | NA     | NA      | NA      | NA    | NA       | NA      |
| 16  | rs305062   | 84533003 | G  | ADD  | 7314  | 1.252  | 0.1761  | 0.8867  | 1.769 | 1.277    | 0.2014  |
| 16  | rs305061   | 84533160 | C  | ADD  | 7293  | 0.9974 | 0.0494  | 0.9054  | 1.099 | -0.05247 | 0.9582  |
| 16  | 84533416   | 84533416 | C  | ADD  | 4259  | 1.02   | 0.1007  | 0.8372  | 1.243 | 0.196    | 0.8446  |
| 16  | rs305060   | 84533417 | C  | ADD  | 7291  | 0.9982 | 0.04946 | 0.906   | 1.1   | -0.03663 | 0.9708  |
| 16  | rs16940099 | 84533441 | C  | ADD  | 7295  | 0.9765 | 0.09089 | 0.8172  | 1.167 | -0.2617  | 0.7936  |
| 16  | rs16940100 | 84533460 | T  | ADD  | 7300  | 0.986  | 0.09054 | 0.8257  | 1.177 | -0.1559  | 0.8761  |
| 16  | 84533481   | 84533481 | O  | ADD  | 7316  | NA     | NA      | NA      | NA    | NA       | NA      |
| 16  | rs305059   | 84533519 | A  | ADD  | 7087  | 0.9782 | 0.04993 | 0.887   | 1.079 | -0.441   | 0.6592  |
| 16  | 84533526   | 84533526 | O  | ADD  | 7311  | NA     | NA      | NA      | NA    | NA       | NA      |
| 16  | 84533672   | 84533672 | T  | ADD  | 7300  | 0.986  | 0.09054 | 0.8257  | 1.177 | -0.1559  | 0.8761  |
| 16  | 84533804   | 84533804 | C  | ADD  | 7299  | 0.9859 | 0.09053 | 0.8256  | 1.177 | -0.1571  | 0.8752  |
| 16  | 84533839   | 84533839 | O  | ADD  | 7173  | NA     | NA      | NA      | NA    | NA       | NA      |
| 16  | 84533939   | 84533939 | C  | ADD  | 7150  | 0.9905 | 0.09083 | 0.829   | 1.184 | -0.105   | 0.9164  |
| 16  | 84534522   | 84534522 | G  | ADD  | 7236  | 1.137  | 0.2247  | 0.7319  | 1.766 | 0.5708   | 0.5681  |
| 16  | 84534632   | 84534632 | C  | ADD  | 7313  | 1.481  | 0.8033  | 0.3067  | 7.149 | 0.4886   | 0.6252  |
| 16  | 84534741   | 84534741 | T  | ADD  | 7187  | 1.257  | 0.5174  | 0.4558  | 3.465 | 0.4417   | 0.6587  |
| 16  | rs7202472  | 84535003 | T  | ADD  | 7271  | 0.9265 | 0.1558  | 0.6827  | 1.257 | -0.4898  | 0.6243  |
| 16  | 84535111   | 84535111 | T  | ADD  | 7179  | 0.822  | 0.2051  | 0.5499  | 1.229 | -0.9559  | 0.3391  |
| 16  | 84535271   | 84535271 | A  | ADD  | 7285  | 0.3062 | 0.8415  | 0.05885 | 1.593 | -1.406   | 0.1596  |
| 16  | 84535272   | 84535272 | A  | ADD  | 7301  | 0.1825 | 1.124   | 0.02014 | 1.653 | -1.513   | 0.1303  |
| 16  | rs305097   | 84535412 | A  | ADD  | 7215  | 1.125  | 0.1068  | 0.9129  | 1.387 | 1.106    | 0.2686  |
| 16  | rs62051024 | 84535456 | C  | ADD  | 7033  | 0.9129 | 0.07258 | 0.7919  | 1.052 | -1.255   | 0.2093  |
| 16  | rs305095   | 84535500 | T  | ADD  | 7284  | 1.076  | 0.1043  | 0.8767  | 1.319 | 0.6984   | 0.4849  |
| 16  | rs305094   | 84535606 | C  | ADD  | 7262  | 1.008  | 0.0495  | 0.915   | 1.111 | 0.1659   | 0.8683  |
| 16  | rs72807020 | 84535618 | G  | ADD  | 7266  | 0.9293 | 0.05972 | 0.8266  | 1.045 | -1.228   | 0.2194  |
| 16  | rs16940101 | 84535626 | G  | ADD  | 7315  | 0.9656 | 0.08894 | 0.8111  | 1.149 | -0.3941  | 0.6935  |
| 16  | rs16940103 | 84535710 | T  | ADD  | 7264  | 0.9216 | 0.05976 | 0.8197  | 1.036 | -1.367   | 0.1717  |
| 16  | rs16940104 | 84535711 | T  | ADD  | 7300  | 0.9671 | 0.09049 | 0.8099  | 1.155 | -0.3697  | 0.7116  |
| 16  | rs7186094  | 84535988 | T  | ADD  | 7310  | 0.9864 | 0.05594 | 0.8839  | 1.101 | -0.2452  | 0.8063  |
| 16  | rs7190319  | 84536046 | G  | ADD  | 7313  | 0.9872 | 0.05599 | 0.8846  | 1.102 | -0.2307  | 0.8175  |
| 16  | rs305093   | 84536086 | T  | ADD  | 7288  | 1.001  | 0.04964 | 0.9084  | 1.104 | 0.02522  | 0.9799  |
| 16  | 84536244   | 84536244 | O  | ADD  | 7308  | NA     | NA      | NA      | NA    | NA       | NA      |
| 16  | rs11639990 | 84536305 | G  | ADD  | 7314  | 0.9869 | 0.05592 | 0.8845  | 1.101 | -0.2355  | 0.8138  |
| 16  | 84536585   | 84536585 | O  | ADD  | 7227  | NA     | NA      | NA      | NA    | NA       | NA      |
| 16  | 84536608   | 84536608 | C  | ADD  | 7284  | 2.475  | 0.5035  | 0.9226  | 6.639 | 1.8      | 0.07187 |
| 16  | rs305092   | 84536618 | A  | ADD  | 7256  | 0.9983 | 0.05266 | 0.9004  | 1.107 | -0.03274 | 0.9739  |
| 16  | rs305091   | 84536744 | A  | ADD  | 7290  | 0.9886 | 0.05214 | 0.8926  | 1.095 | -0.2198  | 0.8261  |
| 16  | 84536846   | 84536846 | C  | ADD  | 3139  | 0.9548 | 0.08598 | 0.8067  | 1.13  | -0.5383  | 0.5903  |

| CHR | SNP        | BP       | A1 | TEST | NMISS | OR       | SE       | L95     | U95    | STAT       | P        |
|-----|------------|----------|----|------|-------|----------|----------|---------|--------|------------|----------|
| 16  | rs305090   | 84536847 | T  | ADD  | 7267  | 0.9997   | 0.05212  | 0.9026  | 1.107  | -0.00661   | 0.9947   |
| 16  | 84536862   | 84536862 | A  | ADD  | 7313  | 1.941    | 0.561    | 0.6462  | 5.828  | 1.182      | 0.2373   |
| 16  | 84537033   | 84537033 | T  | ADD  | 7254  | 4.49E-10 | 2.44E+04 | 0       | inf    | -0.000883  | 0.9993   |
| 16  | 84537070   | 84537070 | T  | ADD  | 7287  | 0.3671   | 0.847    | 0.06979 | 1.931  | -1.183     | 0.2367   |
| 16  | 84537135   | 84537135 | 0  | ADD  | 7273  | NA       | NA       | NA      | NA     | NA         | NA       |
| 16  | 84537212   | 84537212 | A  | ADD  | 7305  | 6.99E-10 | 1.60E+04 | 0       | inf    | -0.001317  | 0.9989   |
| 16  | 84537309   | 84537309 | 0  | ADD  | 7307  | NA       | NA       | NA      | NA     | NA         | NA       |
| 16  | rs11641591 | 84537652 | T  | ADD  | 7266  | 1.264    | 0.1834   | 0.882   | 1.81   | 1.276      | 0.2021   |
| 16  | rs62051025 | 84537707 | T  | ADD  | 6886  | 0.8909   | 0.08196  | 0.7587  | 1.046  | -1.409     | 0.1588   |
| 16  | rs965773   | 84537847 | A  | ADD  | 7263  | 1.02     | 0.08429  | 0.8648  | 1.203  | 0.2362     | 0.8133   |
| 16  | rs16940113 | 84537948 | T  | ADD  | 7313  | 1.008    | 0.8683   | 0.1838  | 5.528  | 0.009163   | 0.9927   |
| 16  | 84538025   | 84538025 | G  | ADD  | 7280  | 1.023    | 0.0969   | 0.8461  | 1.237  | 0.2348     | 0.8144   |
| 16  | rs731708   | 84538035 | A  | ADD  | 7234  | 0.9516   | 0.1499   | 0.7093  | 1.277  | -0.3308    | 0.7408   |
| 16  | 84538040   | 84538040 | T  | ADD  | 7016  | 0.6518   | 0.2583   | 0.3929  | 1.081  | -1.657     | 0.09751  |
| 16  | rs731709   | 84538088 | C  | ADD  | 7282  | 1.024    | 0.09191  | 0.8552  | 1.226  | 0.2575     | 0.7968   |
| 16  | 84538106   | 84538106 | T  | ADD  | 7004  | 1.122    | 0.2497   | 0.6876  | 1.83   | 0.46       | 0.6455   |
| 16  | 84538380   | 84538380 | 0  | ADD  | 7291  | NA       | NA       | NA      | NA     | NA         | NA       |
| 16  | rs731707   | 84538469 | C  | ADD  | 7265  | 1.058    | 0.08238  | 0.8999  | 1.243  | 0.6795     | 0.4968   |
| 16  | 84538530   | 84538530 | A  | ADD  | 7287  | 0.8164   | 1.075    | 0.09936 | 6.708  | -0.1888    | 0.8502   |
| 16  | rs305089   | 84538531 | T  | ADD  | 7291  | 0.9929   | 0.04949  | 0.9011  | 1.094  | -0.1442    | 0.8853   |
| 16  | 84538676   | 84538676 | 0  | ADD  | 7290  | NA       | NA       | NA      | NA     | NA         | NA       |
| 16  | 84538740   | 84538740 | T  | ADD  | 7205  | 0.5305   | 1.018    | 0.07214 | 3.901  | -0.6227    | 0.5335   |
| 16  | 84538942   | 84538942 | G  | ADD  | 7007  | 1.066    | 0.2046   | 0.7138  | 1.592  | 0.3119     | 0.7551   |
| 16  | 84538944   | 84538944 | T  | ADD  | 7301  | 3.65E-10 | 1.72E+04 | 0       | inf    | -0.001261  | 0.999    |
| 16  | rs11643168 | 84538983 | T  | ADD  | 7258  | 0.9896   | 0.07082  | 0.8614  | 1.137  | -0.1474    | 0.8828   |
| 16  | rs305088   | 84539102 | T  | ADD  | 7248  | 0.9893   | 0.04444  | 0.9068  | 1.079  | -0.2419    | 0.8089   |
| 16  | 84539195   | 84539195 | C  | ADD  | 7316  | 1.31E+09 | 2.44E+04 | 0       | inf    | 0.0008612  | 0.9993   |
| 16  | 84539211   | 84539211 | C  | ADD  | 7300  | 1.363    | 1.226    | 0.1233  | 15.06  | 0.2524     | 0.8007   |
| 16  | 84539306   | 84539306 | A  | ADD  | 6314  | 1.085    | 0.08863  | 0.9119  | 1.291  | 0.9199     | 0.3576   |
| 16  | rs305087   | 84539747 | C  | ADD  | 6903  | 0.8401   | 0.05607  | 0.7526  | 0.9377 | -3.108     | 0.001884 |
| 16  | rs7198504  | 84539802 | C  | ADD  | 6770  | 0.916    | 0.04223  | 0.8433  | 0.9951 | -2.077     | 0.03779  |
| 16  | rs9935237  | 84540017 | G  | ADD  | 6188  | 0.6834   | 0.3452   | 0.3474  | 1.344  | -1.103     | 0.2702   |
| 16  | rs305086   | 84540022 | A  | ADD  | 7312  | 1.022    | 0.04904  | 0.9281  | 1.125  | 0.4394     | 0.6604   |
| 16  | rs8053060  | 84540490 | A  | ADD  | 5034  | 1.017    | 0.05481  | 0.9134  | 1.132  | 0.3077     | 0.7583   |
| 16  | 84540536   | 84540536 | 0  | ADD  | 7318  | NA       | NA       | NA      | NA     | NA         | NA       |
| 16  | 84540547   | 84540547 | 0  | ADD  | 7318  | NA       | NA       | NA      | NA     | NA         | NA       |
| 16  | rs6540234  | 84540557 | T  | ADD  | 7263  | 0.9895   | 0.04099  | 0.9131  | 1.072  | -0.257     | 0.7972   |
| 16  | rs8049187  | 84540779 | T  | ADD  | 5058  | 1.041    | 0.0447   | 0.9537  | 1.136  | 0.8997     | 0.3683   |
| 16  | rs8062690  | 84540827 | G  | ADD  | 4988  | 0.9103   | 0.0596   | 0.81    | 1.023  | -1.576     | 0.1149   |
| 16  | rs8053604  | 84540842 | T  | ADD  | 4292  | 1.036    | 0.04862  | 0.9422  | 1.14   | 0.7349     | 0.4624   |
| 16  | 84541049   | 84541049 | G  | ADD  | 7305  | 3.49E-10 | 2.44E+04 | 0       | inf    | -0.0008933 | 0.9993   |
| 16  | 84541077   | 84541077 | 0  | ADD  | 6990  | NA       | NA       | NA      | NA     | NA         | NA       |
| 16  | 84541142   | 84541142 | G  | ADD  | 7315  | 3.50E-10 | 2.44E+04 | 0       | inf    | -0.0008932 | 0.9993   |
| 16  | 84541177   | 84541177 | C  | ADD  | 4169  | 0.919    | 0.04851  | 0.8357  | 1.011  | -1.741     | 0.08164  |
| 16  | 84541179   | 84541179 | T  | ADD  | 4168  | 0.9201   | 0.04852  | 0.8366  | 1.012  | -1.716     | 0.08617  |
| 16  | 84541180   | 84541180 | C  | ADD  | 4168  | 0.9201   | 0.04852  | 0.8366  | 1.012  | -1.716     | 0.08617  |
| 16  | rs2361768  | 84541181 | G  | ADD  | 4168  | 0.9201   | 0.04852  | 0.8366  | 1.012  | -1.716     | 0.08617  |
| 16  | 84541385   | 84541385 | A  | ADD  | 7306  | 3.49E-10 | 2.44E+04 | 0       | inf    | -0.0008933 | 0.9993   |
| 16  | 84541450   | 84541450 | G  | ADD  | 7269  | 0.7239   | 1.425    | 0.04429 | 11.83  | -0.2266    | 0.8207   |
| 16  | rs55739703 | 84541492 | G  | ADD  | 7255  | 0.9399   | 0.1173   | 0.7468  | 1.183  | -0.5289    | 0.5969   |
| 16  | rs870614   | 84541516 | A  | ADD  | 5801  | 0.9662   | 0.05647  | 0.8649  | 1.079  | -0.6094    | 0.5423   |
| 16  | rs8047292  | 84541556 | T  | ADD  | 7314  | 0.6117   | 0.6361   | 0.1758  | 2.128  | -0.7728    | 0.4396   |

| CHR | SNP        | BP       | A1 | TEST | NMISS | OR       | SE       | L95     | U95    | STAT       | P      |
|-----|------------|----------|----|------|-------|----------|----------|---------|--------|------------|--------|
| 16  | rs908988   | 84542101 | G  | ADD  | 7289  | 0.9885   | 0.03966  | 0.9146  | 1.068  | -0.2909    | 0.7711 |
| 16  | rs8060078  | 84542153 | T  | ADD  | 7296  | 2.164    | 0.667    | 0.5854  | 7.998  | 1.157      | 0.2472 |
| 16  | rs908987   | 84542390 | T  | ADD  | 6896  | 0.9898   | 0.04083  | 0.9137  | 1.072  | -0.2499    | 0.8027 |
| 16  | rs908986   | 84542429 | G  | ADD  | 7292  | 1.006    | 0.04025  | 0.9299  | 1.089  | 0.1556     | 0.8764 |
| 16  | rs908985   | 84542503 | T  | ADD  | 7297  | 1.004    | 0.04025  | 0.9277  | 1.086  | 0.09462    | 0.9246 |
| 16  | 84542511   | 84542511 | A  | ADD  | 7293  | 0.7563   | 0.67     | 0.2034  | 2.812  | -0.4169    | 0.6768 |
| 16  | rs908984   | 84542530 | T  | ADD  | 7313  | 1.005    | 0.04023  | 0.9292  | 1.088  | 0.135      | 0.8926 |
| 16  | rs57670691 | 84542583 | A  | ADD  | 7271  | 0.891    | 0.1122   | 0.7152  | 1.11   | -1.029     | 0.3034 |
| 16  | rs57396687 | 84542701 | A  | ADD  | 7275  | 0.9157   | 0.1133   | 0.7334  | 1.143  | -0.777     | 0.4372 |
| 16  | rs1915034  | 84542858 | A  | ADD  | 7303  | 1.019    | 0.04106  | 0.9403  | 1.105  | 0.4612     | 0.6447 |
| 16  | rs4240807  | 84542862 | A  | ADD  | 7289  | 1.019    | 0.04107  | 0.9402  | 1.104  | 0.4585     | 0.6466 |
| 16  | rs1915033  | 84542932 | A  | ADD  | 7273  | 1.007    | 0.04026  | 0.9305  | 1.09   | 0.1699     | 0.8651 |
| 16  | 84542936   | 84542936 | T  | ADD  | 7315  | 3.50E-10 | 2.44E+04 | 0       | inf    | -0.0008932 | 0.9993 |
| 16  | 84542966   | 84542966 | C  | ADD  | 7315  | 3.50E-10 | 2.44E+04 | 0       | inf    | -0.0008932 | 0.9993 |
| 16  | rs4843871  | 84543036 | G  | ADD  | 7273  | 0.9952   | 0.03986  | 0.9204  | 1.076  | -0.1215    | 0.9033 |
| 16  | rs4843872  | 84543172 | A  | ADD  | 7298  | 1.003    | 0.0402   | 0.9275  | 1.086  | 0.0864     | 0.9311 |
| 16  | 84543226   | 84543226 | A  | ADD  | 7317  | 7.05E+08 | 2.44E+04 | 0       | inf    | 0.0008357  | 0.9993 |
| 16  | rs10863201 | 84543272 | C  | ADD  | 7057  | 0.9946   | 0.04051  | 0.9187  | 1.077  | -0.1344    | 0.8931 |
| 16  | rs58073431 | 84543416 | C  | ADD  | 7276  | 0.9068   | 0.1134   | 0.726   | 1.133  | -0.8627    | 0.3883 |
| 16  | rs59821663 | 84543420 | A  | ADD  | 7276  | 0.9068   | 0.1134   | 0.726   | 1.133  | -0.8627    | 0.3883 |
| 16  | 84543445   | 84543445 | O  | ADD  | 7313  | NA       | NA       | NA      | NA     | NA         | NA     |
| 16  | 84543446   | 84543446 | O  | ADD  | 7313  | NA       | NA       | NA      | NA     | NA         | NA     |
| 16  | rs59403904 | 84543458 | T  | ADD  | 7189  | 1.017    | 0.1354   | 0.7798  | 1.326  | 0.1226     | 0.9024 |
| 16  | 84543506   | 84543506 | O  | ADD  | 7318  | NA       | NA       | NA      | NA     | NA         | NA     |
| 16  | 84543518   | 84543518 | O  | ADD  | 7318  | NA       | NA       | NA      | NA     | NA         | NA     |
| 16  | rs58189590 | 84543560 | A  | ADD  | 7270  | 0.9001   | 0.1132   | 0.7209  | 1.124  | -0.93      | 0.3524 |
| 16  | rs57426547 | 84543596 | T  | ADD  | 7270  | 0.9001   | 0.1132   | 0.7209  | 1.124  | -0.93      | 0.3524 |
| 16  | 84543660   | 84543660 | O  | ADD  | 7318  | NA       | NA       | NA      | NA     | NA         | NA     |
| 16  | rs73268906 | 84544188 | G  | ADD  | 7270  | 0.9064   | 0.1134   | 0.7258  | 1.132  | -0.8662    | 0.3864 |
| 16  | rs73268908 | 84544290 | A  | ADD  | 7278  | 0.9126   | 0.1136   | 0.7305  | 1.14   | -0.8052    | 0.4207 |
| 16  | rs73268912 | 84544401 | A  | ADD  | 7273  | 0.9205   | 0.1133   | 0.7371  | 1.15   | -0.7306    | 0.465  |
| 16  | 84544635   | 84544635 | T  | ADD  | 7272  | 0.5294   | 0.665    | 0.1438  | 1.949  | -0.9565    | 0.3388 |
| 16  | 84544641   | 84544641 | O  | ADD  | 7316  | NA       | NA       | NA      | NA     | NA         | NA     |
| 16  | 84544743   | 84544743 | G  | ADD  | 7315  | 3.50E-10 | 2.44E+04 | 0       | inf    | -0.0008932 | 0.9993 |
| 16  | rs59120392 | 84544797 | T  | ADD  | 7281  | 0.9166   | 0.1135   | 0.7339  | 1.145  | -0.7677    | 0.4427 |
| 16  | rs57278440 | 84544999 | C  | ADD  | 7282  | 0.9164   | 0.1135   | 0.7337  | 1.145  | -0.7692    | 0.4418 |
| 16  | rs10863202 | 84545499 | A  | ADD  | 7198  | 1.004    | 0.04006  | 0.9278  | 1.086  | 0.08818    | 0.9297 |
| 16  | rs8060960  | 84545861 | T  | ADD  | 7265  | 0.9904   | 0.04033  | 0.9151  | 1.072  | -0.2404    | 0.81   |
| 16  | rs8048151  | 84546099 | C  | ADD  | 7254  | 1.006    | 0.04067  | 0.9294  | 1.09   | 0.1587     | 0.8739 |
| 16  | 84546166   | 84546166 | A  | ADD  | 7277  | 0.5367   | 0.8868   | 0.09438 | 3.052  | -0.7017    | 0.4829 |
| 16  | 84546175   | 84546175 | A  | ADD  | 7315  | 3.50E-10 | 2.44E+04 | 0       | inf    | -0.0008932 | 0.9993 |
| 16  | rs73268923 | 84546268 | T  | ADD  | 7280  | 0.9266   | 0.1138   | 0.7414  | 1.158  | -0.6706    | 0.5025 |
| 16  | 84546359   | 84546359 | A  | ADD  | 7275  | 0.9147   | 0.1134   | 0.7324  | 1.142  | -0.7865    | 0.4316 |
| 16  | rs6540235  | 84546396 | T  | ADD  | 7274  | 0.9998   | 0.03991  | 0.9246  | 1.081  | -0.00548   | 0.9956 |
| 16  | 84546553   | 84546553 | O  | ADD  | 7291  | NA       | NA       | NA      | NA     | NA         | NA     |
| 16  | rs7186247  | 84546570 | T  | ADD  | 7269  | 0.9989   | 0.0399   | 0.9238  | 1.08   | -0.02693   | 0.9785 |
| 16  | 84546654   | 84546654 | G  | ADD  | 7224  | 1.115    | 0.4624   | 0.4505  | 2.76   | 0.2354     | 0.8139 |
| 16  | rs7199472  | 84546685 | G  | ADD  | 7307  | 0.9914   | 0.03977  | 0.9171  | 1.072  | -0.2165    | 0.8286 |
| 16  | rs11640143 | 84546965 | C  | ADD  | 7288  | 0.8332   | 0.07396  | 0.7208  | 0.9631 | -2.468     | 0.0136 |
| 16  | 84547130   | 84547130 | T  | ADD  | 7247  | 1.264    | 1.45     | 0.07372 | 21.66  | 0.1614     | 0.8718 |
| 16  | 84547216   | 84547216 | T  | ADD  | 7318  | 1.528    | 1.157    | 0.1583  | 14.74  | 0.3664     | 0.714  |
| 16  | rs4843873  | 84547276 | A  | ADD  | 7292  | 1.018    | 0.04011  | 0.9408  | 1.101  | 0.439      | 0.6607 |

| CHR | SNP        | BP       | A1 | TEST | NMISS | OR       | SE       | L95     | U95    | STAT       | P        |
|-----|------------|----------|----|------|-------|----------|----------|---------|--------|------------|----------|
| 16  | 84547352   | 84547352 | A  | ADD  | 7224  | 1.696    | 0.3949   | 0.7822  | 3.677  | 1.338      | 0.1809   |
| 16  | rs4843874  | 84547399 | C  | ADD  | 7294  | 1.007    | 0.04006  | 0.9308  | 1.089  | 0.1687     | 0.866    |
| 16  | rs4843875  | 84547443 | T  | ADD  | 5748  | 1.031    | 0.0575   | 0.9214  | 1.154  | 0.5363     | 0.5918   |
| 16  | 84547570   | 84547570 | O  | ADD  | 7318  | NA       | NA       | NA      | NA     | NA         | NA       |
| 16  | 84547601   | 84547601 | C  | ADD  | 7278  | 0.5371   | 0.8869   | 0.09444 | 3.055  | -0.7009    | 0.4834   |
| 16  | rs73268928 | 84547653 | G  | ADD  | 7262  | 0.9453   | 0.1158   | 0.7534  | 1.186  | -0.4855    | 0.6273   |
| 16  | 84547657   | 84547657 | O  | ADD  | 7288  | NA       | NA       | NA      | NA     | NA         | NA       |
| 16  | rs11117426 | 84547768 | C  | ADD  | 7231  | 0.9168   | 0.05293  | 0.8265  | 1.017  | -1.641     | 0.1009   |
| 16  | 84547926   | 84547926 | C  | ADD  | 7316  | 3.49E-10 | 2.44E+04 | 0       | inf    | -0.0008932 | 0.9993   |
| 16  | rs11117427 | 84548058 | A  | ADD  | 7189  | 0.9196   | 0.05343  | 0.8281  | 1.021  | -1.569     | 0.1166   |
| 16  | rs925992   | 84548081 | T  | ADD  | 7089  | 1.005    | 0.04061  | 0.9281  | 1.088  | 0.1229     | 0.9022   |
| 16  | 84548374   | 84548374 | T  | ADD  | 7317  | 3.49E-10 | 2.44E+04 | 0       | inf    | -0.0008932 | 0.9993   |
| 16  | 84548382   | 84548382 | C  | ADD  | 7242  | 0.3549   | 0.7192   | 0.08668 | 1.453  | -1.44      | 0.1497   |
| 16  | rs8057009  | 84548424 | G  | ADD  | 7306  | 0.9939   | 0.04043  | 0.9182  | 1.076  | -0.1521    | 0.8791   |
| 16  | rs6540236  | 84548591 | A  | ADD  | 7216  | 1.014    | 0.04034  | 0.9369  | 1.097  | 0.3437     | 0.7311   |
| 16  | rs12445476 | 84548770 | G  | ADD  | 7314  | 0.9114   | 0.05307  | 0.8214  | 1.011  | -1.748     | 0.08044  |
| 16  | 84548866   | 84548866 | G  | ADD  | 7312  | 9.676    | 1.1      | 1.12    | 83.62  | 2.063      | 0.03915  |
| 16  | 84548901   | 84548901 | T  | ADD  | 5785  | 0.9434   | 0.1093   | 0.7615  | 1.169  | -0.5336    | 0.5936   |
| 16  | rs7185590  | 84549154 | A  | ADD  | 7272  | 1.435    | 0.3351   | 0.7438  | 2.767  | 1.077      | 0.2815   |
| 16  | rs11642873 | 84549206 | C  | ADD  | 7254  | 0.913    | 0.05377  | 0.8217  | 1.014  | -1.693     | 0.09054  |
| 16  | 84549320   | 84549320 | C  | ADD  | 6273  | 0.6738   | 0.2362   | 0.4241  | 1.071  | -1.671     | 0.09463  |
| 16  | rs6540238  | 84549328 | A  | ADD  | 7179  | 1.012    | 0.04033  | 0.935   | 1.095  | 0.2937     | 0.769    |
| 16  | rs12444486 | 84550150 | C  | ADD  | 7217  | 0.9574   | 0.03631  | 0.8916  | 1.028  | -1.2       | 0.2301   |
| 16  | rs4843876  | 84550233 | T  | ADD  | 7311  | 1.003    | 0.03951  | 0.9284  | 1.084  | 0.07868    | 0.9373   |
| 16  | rs11117428 | 84550330 | C  | ADD  | 7032  | 1.002    | 0.04333  | 0.9205  | 1.091  | 0.04722    | 0.9623   |
| 16  | rs2361764  | 84550459 | G  | ADD  | 7185  | 1.005    | 0.03976  | 0.9299  | 1.087  | 0.1312     | 0.8956   |
| 16  | 84550594   | 84550594 | O  | ADD  | 7318  | NA       | NA       | NA      | NA     | NA         | NA       |
| 16  | rs2361763  | 84550635 | T  | ADD  | 7230  | 0.99     | 0.03714  | 0.9205  | 1.065  | -0.2696    | 0.7874   |
| 16  | rs2885364  | 84550691 | A  | ADD  | 7214  | 1.005    | 0.03973  | 0.9293  | 1.086  | 0.1141     | 0.9091   |
| 16  | rs4843877  | 84550733 | C  | ADD  | 7198  | 0.9931   | 0.03976  | 0.9186  | 1.074  | -0.1748    | 0.8612   |
| 16  | rs35929052 | 84551985 | T  | ADD  | 7023  | 0.9792   | 0.07222  | 0.85    | 1.128  | -0.2907    | 0.7713   |
| 16  | rs908983   | 84552021 | C  | ADD  | 7307  | 1.015    | 0.03903  | 0.9403  | 1.096  | 0.3836     | 0.7013   |
| 16  | rs883332   | 84552225 | C  | ADD  | 7315  | 1.047    | 0.2224   | 0.6774  | 1.62   | 0.2086     | 0.8348   |
| 16  | rs34347181 | 84552262 | O  | ADD  | 7316  | NA       | NA       | NA      | NA     | NA         | NA       |
| 16  | rs2049086  | 84552380 | T  | ADD  | 7040  | 1.002    | 0.04009  | 0.9259  | 1.083  | 0.03836    | 0.9694   |
| 16  | rs908982   | 84552384 | A  | ADD  | 7059  | 1.001    | 0.03996  | 0.9256  | 1.083  | 0.02414    | 0.9807   |
| 16  | 84552424   | 84552424 | O  | ADD  | 7318  | NA       | NA       | NA      | NA     | NA         | NA       |
| 16  | rs8044852  | 84552728 | A  | ADD  | 7216  | 0.9868   | 0.0389   | 0.9143  | 1.065  | -0.3421    | 0.7323   |
| 16  | rs908981   | 84552926 | T  | ADD  | 7300  | 0.9925   | 0.03872  | 0.9199  | 1.071  | -0.1952    | 0.8453   |
| 16  | 84552937   | 84552937 | C  | ADD  | 6860  | 0.778    | 0.08142  | 0.6632  | 0.9126 | -3.084     | 0.002044 |
| 16  | rs12446139 | 84553085 | G  | ADD  | 7300  | 0.9925   | 0.03872  | 0.9199  | 1.071  | -0.1952    | 0.8453   |
| 16  | 84553110   | 84553110 | C  | ADD  | 7244  | 0.9538   | 0.1192   | 0.7551  | 1.205  | -0.3971    | 0.6913   |
| 16  | rs12919427 | 84553160 | A  | ADD  | 7300  | 0.9925   | 0.03872  | 0.9199  | 1.071  | -0.1952    | 0.8453   |
| 16  | rs12930405 | 84553163 | C  | ADD  | 7300  | 0.9925   | 0.03872  | 0.9199  | 1.071  | -0.1952    | 0.8453   |
| 16  | rs11642456 | 84553581 | T  | ADD  | 7299  | 0.9928   | 0.03872  | 0.9202  | 1.071  | -0.1868    | 0.8518   |
| 16  | 84553752   | 84553752 | T  | ADD  | 7272  | 0.7246   | 1.425    | 0.04434 | 11.84  | -0.226     | 0.8212   |
| 16  | rs11649461 | 84553758 | C  | ADD  | 7077  | 0.9909   | 0.03899  | 0.918   | 1.07   | -0.2345    | 0.8146   |
| 16  | 84553776   | 84553776 | T  | ADD  | 7306  | 1.507    | 0.6932   | 0.3875  | 5.865  | 0.5921     | 0.5538   |
| 16  | rs11645398 | 84553796 | G  | ADD  | 7156  | 0.9981   | 0.03929  | 0.9242  | 1.078  | -0.04732   | 0.9623   |
| 16  | 84554094   | 84554094 | C  | ADD  | 7314  | 4.25E-10 | 2.44E+04 | 0       | inf    | -0.0008852 | 0.9993   |
| 16  | rs4843324  | 84554392 | O  | ADD  | 7304  | NA       | NA       | NA      | NA     | NA         | NA       |
| 16  | rs11643829 | 84554502 | C  | ADD  | 4758  | 0.9972   | 0.0463   | 0.9107  | 1.092  | -0.06034   | 0.9519   |

| CHR | SNP        | BP       | A1 | TEST | NMISS | OR       | SE       | L95     | U95    | STAT       | P       |
|-----|------------|----------|----|------|-------|----------|----------|---------|--------|------------|---------|
| 16  | rs35615495 | 84554505 | T  | ADD  | 5263  | 0.9192   | 0.06241  | 0.8133  | 1.039  | -1.351     | 0.1769  |
| 16  | rs11640586 | 84554529 | C  | ADD  | 4359  | 1.112    | 0.05002  | 1.008   | 1.227  | 2.124      | 0.03364 |
| 16  | rs59015387 | 84554628 | A  | ADD  | 7309  | 3.49E-10 | 2.44E+04 | 0       | inf    | -0.0008932 | 0.9993  |
| 16  | 84554776   | 84554776 | T  | ADD  | 7250  | 2.333    | 0.9202   | 0.3843  | 14.17  | 0.9208     | 0.3571  |
| 16  | rs12019053 | 84554782 | G  | ADD  | 5121  | 0.9127   | 0.06267  | 0.8072  | 1.032  | -1.458     | 0.1448  |
| 16  | 84554944   | 84554944 | C  | ADD  | 3985  | 0.9708   | 0.05258  | 0.8758  | 1.076  | -0.5632    | 0.5733  |
| 16  | 84554954   | 84554954 | C  | ADD  | 3573  | 0.9518   | 0.05931  | 0.8473  | 1.069  | -0.8334    | 0.4046  |
| 16  | rs11860050 | 84555097 | A  | ADD  | 5183  | 0.9128   | 0.06306  | 0.8067  | 1.033  | -1.447     | 0.1478  |
| 16  | 84555268   | 84555268 | O  | ADD  | 7318  | NA       | NA       | NA      | NA     | NA         | NA      |
| 16  | rs12446834 | 84555541 | C  | ADD  | 4639  | 0.9728   | 0.04635  | 0.8884  | 1.065  | -0.5939    | 0.5526  |
| 16  | rs55906426 | 84555779 | C  | ADD  | 6204  | 1.025    | 0.04569  | 0.9368  | 1.12   | 0.5301     | 0.596   |
| 16  | rs12019051 | 84555863 | G  | ADD  | 4637  | 0.9733   | 0.04635  | 0.8887  | 1.066  | -0.5843    | 0.559   |
| 16  | 84555917   | 84555917 | O  | ADD  | 7303  | NA       | NA       | NA      | NA     | NA         | NA      |
| 16  | 84556011   | 84556011 | O  | ADD  | 7308  | NA       | NA       | NA      | NA     | NA         | NA      |
| 16  | rs16940146 | 84556487 | G  | ADD  | 7311  | 8.682    | 1.115    | 0.9753  | 77.28  | 1.938      | 0.05268 |
| 16  | 84556512   | 84556512 | O  | ADD  | 7317  | NA       | NA       | NA      | NA     | NA         | NA      |
| 16  | rs34445961 | 84556804 | G  | ADD  | 4004  | 1.022    | 0.05084  | 0.9248  | 1.129  | 0.4228     | 0.6724  |
| 16  | rs34256051 | 84556806 | C  | ADD  | 4029  | 1.012    | 0.05032  | 0.9173  | 1.117  | 0.2447     | 0.8067  |
| 16  | 84556855   | 84556855 | T  | ADD  | 7305  | 7.51E-10 | 1.65E+04 | 0       | inf    | -0.001276  | 0.999   |
| 16  | rs62051883 | 84556897 | A  | ADD  | 7125  | 1.207    | 0.3463   | 0.6122  | 2.38   | 0.5432     | 0.587   |
| 16  | rs59276136 | 84556910 | A  | ADD  | 4553  | 0.9694   | 0.04681  | 0.8844  | 1.063  | -0.6641    | 0.5067  |
| 16  | 84557150   | 84557150 | O  | ADD  | 7310  | NA       | NA       | NA      | NA     | NA         | NA      |
| 16  | rs11863308 | 84557298 | T  | ADD  | 7309  | 3.49E-10 | 2.44E+04 | 0       | inf    | -0.0008932 | 0.9993  |
| 16  | 84557332   | 84557332 | C  | ADD  | 6987  | 0.8494   | 0.3677   | 0.4132  | 1.746  | -0.4439    | 0.6571  |
| 16  | 84557466   | 84557466 | G  | ADD  | 7309  | 6.79E-10 | 1.17E+04 | 0       | inf    | -0.001798  | 0.9986  |
| 16  | rs12598292 | 84557532 | T  | ADD  | 5570  | 0.9395   | 0.2323   | 0.5959  | 1.481  | -0.2688    | 0.7881  |
| 16  | rs8053185  | 84557593 | G  | ADD  | 4379  | 0.9681   | 0.04794  | 0.8813  | 1.063  | -0.6758    | 0.4992  |
| 16  | rs12446659 | 84557863 | T  | ADD  | 4331  | 0.9617   | 0.04821  | 0.875   | 1.057  | -0.8093    | 0.4183  |
| 16  | rs35867147 | 84557883 | A  | ADD  | 5186  | 0.9132   | 0.06407  | 0.8054  | 1.035  | -1.418     | 0.1562  |
| 16  | 84557898   | 84557898 | O  | ADD  | 7294  | NA       | NA       | NA      | NA     | NA         | NA      |
| 16  | rs12446684 | 84557908 | T  | ADD  | 4356  | 0.9654   | 0.04805  | 0.8786  | 1.061  | -0.7332    | 0.4634  |
| 16  | rs12444385 | 84557964 | A  | ADD  | 4327  | 0.9612   | 0.04823  | 0.8745  | 1.057  | -0.82      | 0.4122  |
| 16  | 84558091   | 84558091 | C  | ADD  | 4325  | 0.9622   | 0.04824  | 0.8754  | 1.058  | -0.7992    | 0.4242  |
| 16  | rs9924246  | 84558107 | C  | ADD  | 4325  | 0.9622   | 0.04824  | 0.8754  | 1.058  | -0.7992    | 0.4242  |
| 16  | 84558180   | 84558180 | C  | ADD  | 3169  | 0.9573   | 0.05692  | 0.8562  | 1.07   | -0.7672    | 0.443   |
| 16  | 84558188   | 84558188 | C  | ADD  | 3793  | 0.9856   | 0.05208  | 0.89    | 1.092  | -0.2777    | 0.7813  |
| 16  | rs9926350  | 84558192 | A  | ADD  | 2480  | 1.098    | 0.06687  | 0.9633  | 1.252  | 1.4        | 0.1614  |
| 16  | rs9934574  | 84558465 | T  | ADD  | 5163  | 0.9133   | 0.06416  | 0.8054  | 1.036  | -1.413     | 0.1577  |
| 16  | rs9941263  | 84558545 | G  | ADD  | 4329  | 0.9632   | 0.04818  | 0.8764  | 1.059  | -0.7788    | 0.4361  |
| 16  | rs9934725  | 84558585 | T  | ADD  | 4328  | 0.9631   | 0.04818  | 0.8763  | 1.058  | -0.7808    | 0.4349  |
| 16  | 84558619   | 84558619 | T  | ADD  | 7221  | 0.3551   | 0.7191   | 0.08673 | 1.454  | -1.44      | 0.1499  |
| 16  | rs9938885  | 84558713 | G  | ADD  | 4313  | 0.966    | 0.0483   | 0.8788  | 1.062  | -0.7151    | 0.4745  |
| 16  | rs11648475 | 84558762 | G  | ADD  | 3577  | 0.916    | 0.05171  | 0.8277  | 1.014  | -1.697     | 0.08974 |
| 16  | rs74032515 | 84558875 | G  | ADD  | 6987  | 0.8494   | 0.3677   | 0.4132  | 1.746  | -0.4439    | 0.6571  |
| 16  | rs74032517 | 84558990 | O  | ADD  | 7317  | NA       | NA       | NA      | NA     | NA         | NA      |
| 16  | rs72807046 | 84559122 | T  | ADD  | 6428  | 0.7767   | 0.2166   | 0.508   | 1.188  | -1.166     | 0.2434  |
| 16  | 84559204   | 84559204 | C  | ADD  | 7300  | 2.242    | 1.12     | 0.2499  | 20.12  | 0.7212     | 0.4708  |
| 16  | 84559353   | 84559353 | A  | ADD  | 7160  | 2.953    | 1.227    | 0.2667  | 32.7   | 0.8827     | 0.3774  |
| 16  | rs11860004 | 84559380 | A  | ADD  | 3834  | 0.9305   | 0.06621  | 0.8173  | 1.059  | -1.087     | 0.2769  |
| 16  | rs34912238 | 84559404 | T  | ADD  | 6852  | 0.8858   | 0.05559  | 0.7943  | 0.9877 | -2.182     | 0.02911 |
| 16  | rs35655122 | 84559618 | T  | ADD  | 5208  | 0.919    | 0.06393  | 0.8107  | 1.042  | -1.322     | 0.1862  |
| 16  | rs11862493 | 84559626 | C  | ADD  | 5207  | 0.9207   | 0.06395  | 0.8122  | 1.044  | -1.292     | 0.1964  |

| <b>CHR</b> | <b>SNP</b> | <b>BP</b> | <b>A1</b> | <b>TEST</b> | <b>NMISS</b> | <b>OR</b> | <b>SE</b> | <b>L95</b> | <b>U95</b> | <b>STAT</b> | <b>P</b> |
|------------|------------|-----------|-----------|-------------|--------------|-----------|-----------|------------|------------|-------------|----------|
| 16         | rs11859186 | 84559852  | C         | ADD         | 5013         | 0.9663    | 0.07091   | 0.8409     | 1.11       | -0.4841     | 0.6283   |

Table S6. Replicating SNPs

| SNP        | Locus           | Chr | Position (bp) | Meta             |                   | European   |                   |                  |                 | African-American  |          |                  | Asian             |          |                  | Gullah            |                 |          |                  | Hispanic          |                 |          |                  | Amerindian        |                 |          |                  |
|------------|-----------------|-----|---------------|------------------|-------------------|------------|-------------------|------------------|-----------------|-------------------|----------|------------------|-------------------|----------|------------------|-------------------|-----------------|----------|------------------|-------------------|-----------------|----------|------------------|-------------------|-----------------|----------|------------------|
|            |                 |     |               | $P_{META-ALL}^*$ | Alleles (maj/min) | $P_{OMAS}$ | $P_{REPLICATION}$ | OR (95%CI)       | $P_{META-EURO}$ | Alleles (maj/min) | P        | OR (95%CI)       | Alleles (maj/min) | P        | OR (95%CI)       | Alleles (maj/min) | MAF (case/ctrl) | P        | OR (95%CI)       | Alleles (maj/min) | MAF (case/ctrl) | P        | OR (95%CI)       | Alleles (maj/min) | MAF (case/ctrl) | P        | OR (95%CI)       |
| rs1132200  | TMEM39A         | 3   | 120633526     | 8.621E-09        | G/A               | 1.53E-03   | 2.37E-04          | 0.83 (0.76-0.92) | 1.81E-06        | G/A               | 6.92E-02 | 0.75 (0.56-1.02) | G/A               | 1.66E-03 | 0.73 (0.59-0.89) | G/A               | 0.01/0.01       | 9.33E-01 | 1.07 (0.23-4.93) | G/A               | 0.08/0.09       | 1.50E-01 | 0.84 (0.66-1.07) | G/A               | 0.08/0.09       | 3.88E-01 | 1.27 (0.74-2.18) |
| rs9913957  | IKZF3           | 17  | 35228025      | 1.391E-08        | A/G               | 5.08E-04   | 5.14E-04          | 1.39 (1.15-1.66) | 1.38E-05        | A/G               | 1.07E-02 | 1.22 (1.05-1.41) | -                 | -        | -                | A/G               | 0.15/0.16       | 7.02E-01 | 0.91 (0.58-1.45) | A/G               | 0.04/0.03       | 5.27E-03 | 1.84 (1.20-2.81) | A/G               | 0.06/0.03       | 3.54E-01 | 1.32 (0.73-2.39) |
| rs8076347  | IKZF3           | 17  | 35231067      | 3.013E-08        | C/A               | 2.49E-05   | 3.04E-03          | 1.32 (1.1-1.58)  | 4.75E-05        | C/A               | 2.19E-03 | 1.2 (1.07-1.34)  | -                 | -        | -                | C/A               | 0.30/0.31       | 8.66E-01 | 0.97 (0.68-1.39) | C/A               | 0.06/0.05       | 2.51E-02 | 1.50 (1.05-2.14) | C/A               | 0.06/0.03       | 3.17E-01 | 1.34 (0.76-2.36) |
| rs8079075  | IKZF3           | 17  | 35264341      | 4.829E-09        | A/G               | 4.23E-05   | 5.08E-04          | 1.39 (1.16-1.68) | 3.81E-06        | A/G               | 2.62E-03 | 1.26 (1.08-1.46) | -                 | -        | -                | A/G               | 0.17/0.16       | 8.35E-01 | 1.05 (0.67-1.65) | A/G               | 0.04/0.02       | 4.68E-02 | 1.55 (1.01-2.39) | A/G               | 0.06/0.03       | 5.31E-01 | 1.21 (0.66-2.22) |
| rs1453560  | ZBP2            | 17  | 35276967      | 3.48E-10         | A/C               | 2.76E-05   | 6.42E-04          | 1.37 (1.14-1.64) | 3.21E-06        | A/C               | 4.86E-04 | 1.23 (1.09-1.37) | -                 | -        | -                | A/C               | 0.32/0.31       | 7.48E-01 | 1.06 (0.74-1.51) | A/C               | 0.06/0.05       | 2.27E-02 | 1.51 (1.06-2.14) | A/C               | 0.07/0.03       | 3.30E-01 | 1.31 (0.76-2.27) |
| rs454232   | LOC730109/IL12A | 3   | 161214725     | -                | G/A               | 1.49E-04   | 4.92E-05          | 0.86 (0.81-0.93) | 4.50E-07        | G/A               | 1.03E-01 | 1.09 (0.98-1.21) | G/A               | 7.83E-01 | 0.98 (0.86-1.13) | G/A               | 0.45/0.50       | 2.70E-01 | 0.83 (0.59-1.16) | G/A               | 0.35/0.36       | 7.99E-02 | 0.88 (0.76-1.02) | G/A               | 0.31/0.37       | 2.79E-01 | 0.85 (0.63-1.15) |
| rs669003   | LOC730109/IL12A | 3   | 161214579     | -                | A/G               | 1.24E-04   | 1.15E-04          | 0.87 (0.81-0.93) | 1.02E-06        | A/G               | 1.22E-01 | 1.08 (0.98-1.2)  | A/G               | 7.25E-01 | 0.98 (0.85-1.12) | A/G               | 0.45/0.50       | 2.67E-01 | 0.82 (0.59-1.16) | A/G               | 0.35/0.36       | 5.46E-02 | 0.87 (0.75-1.00) | A/G               | 0.31/0.39       | 8.77E-02 | 0.78 (0.58-1.04) |
| rs485499   | LOC730109/IL12A | 3   | 161228557     | -                | A/G               | 1.20E-04   | 1.47E-04          | 0.87 (0.81-0.94) | 1.31E-06        | A/G               | 9.89E-01 | 1 (0.85-1.17)    | A/G               | 7.91E-01 | 0.98 (0.82-1.17) | A/G               | 0.09/0.11       | 4.65E-01 | 0.81 (0.46-1.42) | A/G               | 0.22/0.25       | 1.37E-02 | 0.82 (0.70-0.96) | A/G               | 0.19/0.27       | 3.36E-01 | 0.82 (0.55-1.22) |
| rs2940712  | C10orf64        | 10  | 49726454      | -                | G/A               | 1.94E-03   | 8.73E-04          | 0.88 (0.82-0.95) | 1.62E-05        | G/A               | 8.63E-01 | 1.01 (0.91-1.12) | A/G               | 3.46E-03 | 1.19 (1.06-1.34) | G/A               | 0.39/0.42       | 4.73E-01 | 0.88 (0.63-1.24) | G/A               | 0.33/0.36       | 4.08E-01 | 0.94 (0.81-1.09) | A/G               | 0.36/0.35       | 4.39E-01 | 0.89 (0.66-1.20) |
| rs7542235  | CFHR1           | 1   | 19500236      | -                | A/G               | 1.44E-03   | 1.10E-03          | 1.15 (1.06-1.25) | 1.85E-05        | A/G               | 5.12E-03 | 1.16 (1.05-1.28) | A/G               | 4.11E-01 | 1.09 (0.88-1.35) | A/G               | 0.40/0.37       | 5.38E-01 | 1.12 (0.79-1.58) | A/G               | 0.16/0.16       | 3.02E-01 | 1.11 (0.91-1.34) | A/G               | 0.15/0.13       | 6.72E-02 | 1.49 (0.97-2.27) |
| rs7039790  | D               | 9   | 18853560      | -                | C/A               | 4.12E-04   | 1.14E-03          | 1.27 (1.1-1.47)  | 2.38E-05        | C/A               | 1.74E-01 | 0.93 (0.84-1.03) | C/A               | 8.55E-01 | 1.02 (0.86-1.19) | A/C               | 0.55/0.55       | 9.23E-01 | 1.02 (0.72-1.43) | C/A               | 0.09/0.11       | 9.49E-01 | 0.99 (0.77-1.28) | C/A               | 0.07/0.07       | 7.57E-01 | 0.92 (0.55-1.55) |
| rs7631930  | LPP             | 3   | 189524723     | -                | A/G               | 9.10E-03   | 1.66E-03          | 1.15 (1.05-1.25) | 2.71E-05        | A/G               | 8.33E-01 | 1.01 (0.91-1.12) | G/A               | 6.66E-01 | 1.03 (0.91-1.15) | A/G               | 0.37/0.39       | 7.41E-01 | 0.94 (0.66-1.35) | A/G               | 0.42/0.36       | 8.46E-01 | 1.02 (0.87-1.18) | A/G               | 0.45/0.42       | 6.58E-01 | 1.07 (0.81-1.41) |
| rs11855819 | TMCO5           | 15  | 35966388      | -                | G/A               | 1.86E-03   | 6.58E-03          | 0.86 (0.77-0.96) | 3.48E-05        | G/A               | 9.35E-01 | 1.01 (0.77-1.32) | G/A               | 8.03E-01 | 1.02 (0.88-1.18) | A/G               | 0.04/0.04       | 7.74E-01 | 1.14 (0.47-2.73) | -                 | -               | -        | -                | -                 | -               | -        | -                |
| rs749373   | STXBP6          | 14  | 24343206      | -                | A/G               | 2.30E-03   | 2.32E-03          | 1.16 (1.05-1.27) | 5.26E-05        | A/G               | 3.65E-01 | 0.95 (0.86-1.06) | A/G               | 5.19E-01 | 0.94 (0.78-1.13) | A/G               | 0.39/0.40       | 7.61E-01 | 0.95 (0.66-1.36) | A/G               | 0.15/0.19       | 2.61E-01 | 0.90 (0.74-1.08) | A/G               | 0.14/0.14       | 7.62E-01 | 1.06 (0.71-1.58) |
| rs1075059  | LOC63920        | 5   | 159758376     | -                | A/C               | 7.89E-03   | 7.26E-03          | 0.91 (0.85-0.97) | 5.27E-05        | A/C               | 2.67E-01 | 0.94 (0.85-1.05) | A/C               | 5.64E-01 | 1.05 (0.89-1.24) | A/C               | 0.35/0.28       | 1.24E-01 | 1.35 (0.92-1.98) | A/C               | 0.43/0.46       | 2.02E-02 | 0.84 (0.73-0.97) | A/C               | 0.40/0.47       | 1.88E-02 | 0.72 (0.55-0.95) |
| rs10790605 | OR9D4           | 11  | 123279835     | -                | G/A               | 1.30E-02   | 4.35E-03          | 0.88 (0.81-0.96) | 5.39E-05        | G/A               | 8.75E-01 | 1.01 (0.87-1.16) | G/A               | 9.87E-01 | 1 (0.86-1.16)    | G/A               | 0.12/0.12       | 8.58E-01 | 1.05 (0.62-1.76) | G/A               | 0.12/0.14       | 5.78E-01 | 0.94 (0.77-1.16) | G/A               | 0.13/0.14       | 6.44E-01 | 0.91 (0.60-1.37) |
| rs11895321 | SLIT7           | 5   | 159778988     | -                | A/C               | 7.06E-03   | 3.11E-03          | 1.11 (1.04-1.19) | 6.09E-05        | A/C               | 1.94E-02 | 1.17 (1.03-1.33) | A/C               | 4.42E-01 | 1.06 (0.91-1.25) | A/C               | 0.16/0.19       | 3.60E-01 | 0.81 (0.51-1.28) | A/C               | 0.35/0.32       | 2.06E-02 | 1.19 (1.03-1.39) | A/C               | 0.37/0.32       | 2.53E-01 | 1.19 (0.88-1.61) |
| rs10831318 | SESN3           | 11  | 94585583      | -                | G/A               | 6.05E-03   | 3.29E-03          | 1.12 (1.04-1.2)  | 7.55E-05        | G/A               | 5.39E-01 | 0.95 (0.81-1.11) | G/A               | 5.75E-01 | 1.04 (0.91-1.19) | G/A               | 0.06/0.08       | 3.04E-01 | 0.69 (0.34-1.40) | G/A               | 0.33/0.30       | 4.69E-02 | 1.17 (1.00-1.36) | G/A               | 0.33/0.28       | 2.25E-01 | 1.21 (0.89-1.64) |
| rs9310002  | CADM2           | 3   | 86306105      | -                | G/A               | 3.06E-04   | 6.12E-03          | 1.39 (1.1-1.76)  | 8.30E-05        | -                 | 4.64E-01 | 0.91 (0.70-1.18) | G/A               | 9.01E-03 | 0.74 (0.59-0.93) | G/A               | 0.03/0.03       | 8.33E-01 | 1.12 (0.40-3.16) | G/A               | 0.04/0.04       | 9.32E-01 | 1.02 (0.72-1.43) | G/A               | 0.04/0.03       | 5.00E-01 | 1.29 (0.61-2.72) |
| rs7960162  | FAM19A2         | 12  | 60498125      | -                | A/G               | 1.30E-02   | 4.31E-03          | 0.87 (0.79-0.96) | 9.79E-05        | -                 | 5.35E-01 | 1.09 (0.83-1.42) | A/G               | 3.99E-01 | 0.86 (0.60-1.23) | A/G               | 0.03/0.03       | 7.52E-01 | 1.17 (0.45-3.04) | A/G               | 0.11/0.13       | 3.02E-01 | 0.90 (0.73-1.11) | A/G               | 0.10/0.12       | 4.89E-01 | 0.86 (0.56-1.33) |

a: Data for all ethnic groups.

**Table S7. Reference Panels Used for Imputation**

| Populations       | Panel 1                      | Panel 2            |
|-------------------|------------------------------|--------------------|
| African-Americans | 25 SLE cases<br>21 controls  | -                  |
| Asians            | CHB+JPT<br>1000<br>Genomes   | CHB+JPT<br>HapMap3 |
| Europeans         | 92 SLE cases<br>114 controls | -                  |

CHB: Han Chinese in Beijing, China, JPT: Japanese in Tokyo, Japan
